# Supplementary material for: Room-temperature dynamic nuclear polarization enhanced NMR spectroscopy of small biological molecules in water
Source: Nat Commun. 2021 Nov 25;12:6880. doi: 10.1038/s41467-021-27067-0 (PMC8616939; doi:10.1038/s41467-021-27067-0)
Supplement: Supplementary file 2 — Source Data [file 41467_2021_27067_MOESM2_ESM.xlsx]

## Sheet: Figures
	data deposite	additional source data
Figure 1	https://doi.org/10.6084/m9.figshare.14774433, https://doi.org/10.6084/m9.figshare.14774415
Figure 2	https://doi.org/10.6084/m9.figshare.14774433, https://doi.org/10.6084/m9.figshare.14774415	source data collected in sheet "Supplementary Table4"
Figure 3	https://github.com/xiaohegroup/Simulations-of-Tempol	source data collected in sheet "Supplementary Table 5"
Figure 4	https://doi.org/10.6084/m9.figshare.14774433, https://doi.org/10.6084/m9.figshare.14774415
Figure 5	https://github.com/xiaohegroup/Simulations-of-Tempol	source data collected in sheet "geometry trajectory"
Figure 6	https://github.com/xiaohegroup/Simulations-of-Tempol	source data collected in sheet "geometry trajectory", "spin density covariance", "ACF", "spectral density","memory function"

## Sheet: spin density trajectory
	TEMPO	TEMPO	TEMPO	TEMPO	TEMPO	INDOLE	INDOLE	INDOLE	INDOLE	INDOLE	INDOLE	INDOLE	INDOLE	INDOLE	INDOLE
t (fs)	C2	C6	C2C6average	N(O)	O(N)	H(N)	N	C2	C3	C3a	C4	C5	C6	C7	C7a
0	-0.011466	-0.012689	-0.0120775	0.468419	0.483486	-0.003057	0.008032	-0.000181	-0.000213	0.000362	-2.6e-05	6.5e-05	-0.001885	0.002966	0.001571
1	-0.011302	-0.012297	-0.0117995	0.465037	0.487504	-0.002862	0.007141	-0.000175	-0.00019	0.000329	-4.1e-05	7.6e-05	-0.001874	0.003091	0.001528
2	-0.011506	-0.012401	-0.0119535	0.466454	0.485982	-0.002784	0.007053	-0.000172	-0.00019	0.000347	-5e-05	8.3e-05	-0.001875	0.003071	0.001479
3	-0.011765	-0.012593	-0.012179	0.467927	0.484279	-0.002695	0.006934	-0.000165	-0.000189	0.000372	-6.2e-05	9.3e-05	-0.001861	0.003037	0.001404
4	-0.01213	-0.012837	-0.0124835	0.469814	0.482084	-0.002592	0.006781	-0.000155	-0.000187	0.000403	-8e-05	0.000107	-0.001833	0.002976	0.001311
5	-0.012494	-0.013113	-0.0128035	0.47067	0.480728	-0.002464	0.006611	-0.000146	-0.000183	0.000437	-0.000101	0.000122	-0.001787	0.00289	0.001175
6	-0.013025	-0.013499	-0.013262	0.472781	0.478162	-0.002351	0.006432	-0.000134	-0.000182	0.000475	-0.000126	0.00014	-0.001732	0.00282	0.001068
7	-0.013714	-0.013954	-0.013834	0.475513	0.474879	-0.002238	0.006261	-0.000121	-0.000183	0.000512	-0.000152	0.00016	-0.001666	0.00277	0.000973
8	-0.014283	-0.014241	-0.014262	0.476514	0.473296	-0.002168	0.006145	-0.000108	-0.000178	0.000534	-0.000173	0.000176	-0.001597	0.002754	0.000852
9	-0.014938	-0.014525	-0.0147315	0.476989	0.472287	-0.002132	0.006106	-9.6e-05	-0.000169	0.000543	-0.00019	0.000188	-0.001522	0.002795	0.000693
10	-0.015747	-0.014769	-0.015258	0.478477	0.470404	-0.002097	0.006125	-8.5e-05	-0.00016	0.000542	-0.000204	0.000199	-0.001454	0.002932	0.000511
11	-0.016376	-0.014771	-0.0155735	0.478163	0.470539	-0.00217	0.006273	-7e-05	-0.000145	0.000527	-0.000211	0.000203	-0.001399	0.003166	0.000345
12	-0.016918	-0.014758	-0.015838	0.478494	0.46997	-0.002141	0.00638	-6.4e-05	-0.000131	0.000509	-0.000216	0.000207	-0.001362	0.003304	0.000153
13	-0.017333	-0.014552	-0.0159425	0.478011	0.470516	-0.002183	0.006561	-5.4e-05	-0.000115	0.000484	-0.000216	0.000206	-0.00134	0.003464	4.3e-05
14	-0.017602	-0.014257	-0.0159295	0.47731	0.471395	-0.002221	0.006732	-4.6e-05	-0.0001	0.000454	-0.000213	0.000204	-0.00133	0.00356	-5e-06
15	-0.017699	-0.013901	-0.0158	0.476361	0.47276	-0.002287	0.006897	-3.7e-05	-8.6e-05	0.000419	-0.000209	0.000201	-0.001329	0.003614	2.9e-05
16	-0.017635	-0.013541	-0.015588	0.475164	0.47443	-0.00237	0.007034	-2.7e-05	-7.6e-05	0.000381	-0.000204	0.000197	-0.001333	0.003591	0.000142
17	-0.017406	-0.013205	-0.0153055	0.473597	0.476541	-0.002471	0.007146	-1.8e-05	-7e-05	0.000341	-0.000196	0.000192	-0.001338	0.003513	0.00031
18	-0.017053	-0.012894	-0.0149735	0.472193	0.478453	-0.002557	0.007218	-1e-05	-6.9e-05	0.000301	-0.000187	0.000186	-0.00135	0.003375	0.000509
19	-0.016616	-0.012667	-0.0146415	0.470894	0.480226	-0.002644	0.007277	-2e-06	-7.1e-05	0.000264	-0.000176	0.000181	-0.001368	0.003221	0.000708
20	-0.016128	-0.012537	-0.0143325	0.469868	0.481593	-0.002699	0.007314	2e-06	-7.7e-05	0.000232	-0.000163	0.000175	-0.00139	0.003052	0.000863
21	-0.015636	-0.012516	-0.014076	0.46913	0.482499	-0.002734	0.00734	4e-06	-8.4e-05	0.000205	-0.000148	0.000171	-0.001417	0.002898	0.000961
22	-0.015127	-0.01261	-0.0138685	0.468415	0.483229	-0.00276	0.007362	4e-06	-8.9e-05	0.000184	-0.000133	0.000166	-0.001446	0.00277	0.000999
23	-0.014545	-0.012837	-0.013691	0.467087	0.484422	-0.002796	0.007389	2e-06	-9.2e-05	0.000168	-0.000116	0.000162	-0.00147	0.002685	0.000978
24	-0.014087	-0.013293	-0.01369	0.4677	0.48352	-0.002735	0.00734	-6e-06	-9.9e-05	0.000161	-0.000105	0.000163	-0.001489	0.002637	0.000896
25	-0.013714	-0.013792	-0.013753	0.468559	0.482264	-0.002669	0.007269	-1.5e-05	-0.000107	0.000161	-0.0001	0.000167	-0.001489	0.002642	0.000766
26	-0.013271	-0.014208	-0.0137395	0.467449	0.482855	-0.002642	0.007234	-2.1e-05	-0.000107	0.000161	-9.7e-05	0.000169	-0.001455	0.002659	0.00058
27	-0.012953	-0.014878	-0.0139155	0.468769	0.481016	-0.002525	0.007121	-3.2e-05	-0.000113	0.000171	-0.000101	0.000174	-0.001401	0.002636	0.000363
28	-0.012722	-0.015673	-0.0141975	0.470865	0.478403	-0.002366	0.006979	-4.3e-05	-0.00012	0.000186	-0.00011	0.00018	-0.001327	0.002544	0.000138
29	-0.012641	-0.01643	-0.0145355	0.472962	0.47585	-0.002225	0.00684	-5.1e-05	-0.000127	0.000205	-0.000122	0.000187	-0.001247	0.00244	-5.7e-05
30	-0.012597	-0.017314	-0.0149555	0.47497	0.473498	-0.002102	0.006717	-5.8e-05	-0.00013	0.000225	-0.000136	0.000193	-0.001167	0.002351	-0.00023
31	-0.012626	-0.018187	-0.0154065	0.477003	0.471205	-0.001997	0.006612	-6.2e-05	-0.000132	0.000246	-0.000152	0.000199	-0.001089	0.002296	-0.000376
32	-0.012789	-0.01914	-0.0159645	0.48013	0.468053	-0.001917	0.006527	-6.3e-05	-0.000134	0.000268	-0.00017	0.000206	-0.001026	0.002312	-0.000467
33	-0.012949	-0.020045	-0.016497	0.482141	0.466062	-0.001849	0.006481	-6.3e-05	-0.000129	0.000282	-0.000185	0.000209	-0.000978	0.002328	-0.000544
34	-0.013179	-0.02091	-0.0170445	0.48423	0.464176	-0.001797	0.006473	-6.2e-05	-0.000121	0.00029	-0.000196	0.00021	-0.000947	0.00237	-0.000592
35	-0.01348	-0.021642	-0.017561	0.486029	0.46272	-0.001788	0.006511	-5.8e-05	-0.00011	0.000291	-0.000205	0.000209	-0.000927	0.002448	-0.000607
36	-0.013762	-0.022162	-0.017962	0.486105	0.462967	-0.001807	0.006576	-5.5e-05	-9.3e-05	0.00028	-0.000206	0.000204	-0.000919	0.002494	-0.0006
37	-0.01417	-0.022559	-0.0183645	0.486627	0.462901	-0.001865	0.006653	-4.7e-05	-7.6e-05	0.000265	-0.000204	0.000198	-0.000918	0.002569	-0.000537
38	-0.014654	-0.022765	-0.0187095	0.486756	0.46324	-0.001936	0.006723	-3.8e-05	-5.9e-05	0.000245	-0.000198	0.00019	-0.000926	0.002622	-0.000429
39	-0.015113	-0.022709	-0.018911	0.486343	0.464057	-0.002019	0.006781	-2.7e-05	-4.1e-05	0.000222	-0.000188	0.000181	-0.000938	0.002639	-0.000286
40	-0.015552	-0.022509	-0.0190305	0.48617	0.464547	-0.002048	0.006798	-1.8e-05	-2.8e-05	0.000197	-0.000176	0.000172	-0.000956	0.002581	-0.000133
41	-0.015976	-0.022051	-0.0190135	0.485196	0.465834	-0.002141	0.00683	-6e-06	-1.5e-05	0.000171	-0.000161	0.000162	-0.000981	0.002536	4.4e-05
42	-0.0164	-0.021406	-0.018903	0.484101	0.467072	-0.00222	0.006858	5e-06	-6e-06	0.000148	-0.000147	0.000153	-0.00101	0.002514	0.000195
43	-0.016774	-0.02064	-0.018707	0.483234	0.467966	-0.002257	0.006872	1.3e-05	-3e-06	0.000129	-0.000133	0.000147	-0.001046	0.002488	0.000318
44	-0.017212	-0.019851	-0.0185315	0.483662	0.467482	-0.002252	0.006873	1.9e-05	-8e-06	0.000116	-0.000122	0.000144	-0.001088	0.002487	0.000408
45	-0.017548	-0.018936	-0.018242	0.482616	0.468182	-0.002261	0.006889	2.3e-05	-1.4e-05	0.000105	-0.000111	0.000142	-0.001135	0.00247	0.000455
46	-0.017866	-0.018067	-0.0179665	0.481876	0.468361	-0.002231	0.006892	2.3e-05	-2.4e-05	9.8e-05	-0.000101	0.000141	-0.001179	0.00243	0.000448
47	-0.0182	-0.017289	-0.0177445	0.481454	0.467988	-0.002166	0.006879	1.8e-05	-3.9e-05	9.9e-05	-9.5e-05	0.000142	-0.001219	0.002376	0.000389
48	-0.018421	-0.016528	-0.0174745	0.481019	0.467649	-0.002102	0.006869	1.2e-05	-5.6e-05	0.000106	-9.2e-05	0.000144	-0.001247	0.002335	0.000296
49	-0.018581	-0.015898	-0.0172395	0.480452	0.467223	-0.002022	0.006839	4e-06	-7.4e-05	0.00012	-9.3e-05	0.000147	-0.00126	0.00229	0.00018
50	-0.018711	-0.015414	-0.0170625	0.480355	0.466365	-0.001917	0.006795	-6e-06	-9.3e-05	0.00014	-9.9e-05	0.000152	-0.001255	0.002238	4.5e-05
51	-0.018759	-0.015107	-0.016933	0.480581	0.465209	-0.001803	0.006728	-1.9e-05	-0.000113	0.000165	-0.000112	0.000159	-0.001232	0.002201	-9.1e-05
52	-0.018727	-0.014909	-0.016818	0.480796	0.464023	-0.001674	0.006644	-3.4e-05	-0.000132	0.000192	-0.000128	0.000168	-0.001196	0.002142	-0.00023
53	-0.01867	-0.014995	-0.0168325	0.481949	0.46186	-0.001488	0.006522	-5.3e-05	-0.000152	0.000222	-0.000149	0.000179	-0.001154	0.002056	-0.000371
54	-0.018502	-0.01494	-0.016721	0.481414	0.461641	-0.001455	0.006475	-6.4e-05	-0.000165	0.000248	-0.00017	0.000187	-0.001106	0.002088	-0.000462
55	-0.018268	-0.015172	-0.01672	0.481624	0.460821	-0.00136	0.006388	-8.1e-05	-0.000174	0.000273	-0.000192	0.000196	-0.001066	0.00209	-0.000561
56	-0.017992	-0.015403	-0.0166975	0.481583	0.460616	-0.001366	0.006337	-9.2e-05	-0.00018	0.000294	-0.000214	0.000204	-0.001033	0.002215	-0.000602
57	-0.017621	-0.015564	-0.0165925	0.480052	0.462086	-0.001433	0.006309	-0.0001	-0.000177	0.000308	-0.00023	0.000209	-0.001011	0.002359	-0.000623
58	-0.017322	-0.015843	-0.0165825	0.47961	0.462671	-0.001512	0.006276	-0.000107	-0.000176	0.000322	-0.000245	0.000215	-0.001005	0.002582	-0.000604
59	-0.017049	-0.016077	-0.016563	0.47876	0.463842	-0.001634	0.006263	-0.00011	-0.00017	0.000331	-0.000252	0.000217	-0.001011	0.002811	-0.000557
60	-0.016799	-0.016241	-0.01652	0.478065	0.464936	-0.001767	0.006257	-0.000111	-0.000162	0.000337	-0.000253	0.000217	-0.00103	0.003044	-0.000479
61	-0.016513	-0.016337	-0.016425	0.476581	0.466861	-0.001929	0.006269	-0.00011	-0.000151	0.000337	-0.000246	0.000213	-0.001058	0.003241	-0.000376
62	-0.016175	-0.016387	-0.016281	0.474473	0.469536	-0.00215	0.006329	-0.000102	-0.000136	0.000332	-0.000231	0.000203	-0.001095	0.003413	-0.000224
63	-0.015822	-0.0164	-0.016111	0.473184	0.471438	-0.002306	0.006358	-9.8e-05	-0.000124	0.000328	-0.000213	0.000194	-0.001144	0.003471	-5.7e-05
64	-0.015452	-0.016474	-0.015963	0.472556	0.472581	-0.002372	0.006338	-9.8e-05	-0.000113	0.000323	-0.000195	0.000186	-0.001202	0.003405	9.4e-05
65	-0.015064	-0.016422	-0.015743	0.471576	0.474141	-0.00245	0.006349	-9.3e-05	-0.000103	0.000315	-0.000175	0.000177	-0.001263	0.003334	0.000257
66	-0.014626	-0.016347	-0.0154865	0.469973	0.476272	-0.002534	0.006372	-8.4e-05	-9.1e-05	0.000306	-0.000156	0.000168	-0.00133	0.003247	0.000416
67	-0.014257	-0.016247	-0.015252	0.469192	0.477535	-0.002584	0.006388	-7.3e-05	-8.5e-05	0.000299	-0.00014	0.000163	-0.001399	0.003179	0.000556
68	-0.013892	-0.016189	-0.0150405	0.468827	0.478228	-0.002546	0.006365	-6.6e-05	-8e-05	0.000292	-0.000129	0.000161	-0.001465	0.00307	0.000625
69	-0.01353	-0.016088	-0.014809	0.468289	0.478932	-0.002476	0.006339	-5.9e-05	-7.7e-05	0.000287	-0.00012	0.000161	-0.001524	0.002959	0.00065
70	-0.01328	-0.015973	-0.0146265	0.468411	0.478835	-0.002364	0.006305	-5.3e-05	-7.6e-05	0.000285	-0.000117	0.000166	-0.001569	0.002861	0.000624
71	-0.013119	-0.015853	-0.014486	0.468834	0.478236	-0.002216	0.006272	-4.9e-05	-7.8e-05	0.000286	-0.000118	0.000172	-0.001603	0.002753	0.00056
72	-0.012998	-0.015655	-0.0143265	0.469099	0.477668	-0.002045	0.006246	-4.6e-05	-7.9e-05	0.000289	-0.000123	0.000179	-0.001622	0.00265	0.000473
73	-0.012955	-0.015448	-0.0142015	0.46955	0.47684	-0.001873	0.006223	-4.6e-05	-8.1e-05	0.000296	-0.000131	0.000187	-0.001625	0.002568	0.000376
74	-0.012968	-0.015263	-0.0141155	0.470431	0.475611	-0.001723	0.006212	-4.7e-05	-8.3e-05	0.000304	-0.000142	0.000196	-0.001613	0.002556	0.000286
75	-0.013104	-0.01508	-0.014092	0.471459	0.474302	-0.00158	0.006201	-5e-05	-8.4e-05	0.000314	-0.000156	0.000206	-0.001584	0.002567	0.000191
76	-0.013293	-0.014841	-0.014067	0.472312	0.473269	-0.001458	0.00619	-5.4e-05	-8.4e-05	0.000325	-0.000173	0.000214	-0.001544	0.002603	9.8e-05
77	-0.013489	-0.014571	-0.01403	0.472897	0.472702	-0.001403	0.006196	-5.7e-05	-8.2e-05	0.000333	-0.000191	0.000223	-0.001498	0.002706	2.3e-05
78	-0.013688	-0.014196	-0.013942	0.472226	0.473741	-0.00149	0.006259	-5.3e-05	-7.2e-05	0.000335	-0.000205	0.000229	-0.001449	0.002931	-1.4e-05
79	-0.013993	-0.013887	-0.01394	0.472202	0.474365	-0.001557	0.006305	-5.1e-05	-6.6e-05	0.000338	-0.000218	0.000236	-0.001408	0.003187	-4.3e-05
80	-0.014285	-0.013496	-0.0138905	0.47159	0.475783	-0.001695	0.006381	-4.6e-05	-5.7e-05	0.000339	-0.000225	0.000241	-0.001372	0.003525	-3.6e-05
81	-0.014611	-0.013135	-0.013873	0.471004	0.477181	-0.001849	0.006449	-4.2e-05	-5.1e-05	0.00034	-0.000228	0.000245	-0.001346	0.003895	-1.2e-05
82	-0.014915	-0.012827	-0.013871	0.471068	0.478027	-0.001973	0.00649	-4.3e-05	-5e-05	0.000343	-0.000227	0.000248	-0.001334	0.004214	3e-05
83	-0.015294	-0.012494	-0.013894	0.471136	0.478883	-0.002107	0.006528	-4.5e-05	-4.9e-05	0.000345	-0.000221	0.000249	-0.001326	0.004478	8.2e-05
84	-0.015668	-0.01218	-0.013924	0.471037	0.479839	-0.002264	0.00656	-4.7e-05	-4.8e-05	0.000345	-0.000211	0.000247	-0.00132	0.004675	0.00014
85	-0.015956	-0.011771	-0.0138635	0.470267	0.481528	-0.002479	0.006614	-4.6e-05	-4.5e-05	0.000343	-0.000198	0.000242	-0.001316	0.004823	0.00022
86	-0.016199	-0.011388	-0.0137935	0.46969	0.482952	-0.002676	0.006645	-4.6e-05	-4.3e-05	0.000342	-0.000186	0.000237	-0.001321	0.004885	0.0003
87	-0.016407	-0.01106	-0.0137335	0.468709	0.484636	-0.00289	0.00667	-4.5e-05	-4.2e-05	0.000341	-0.000174	0.000232	-0.001338	0.004861	0.000404
88	-0.016663	-0.010938	-0.0138005	0.468282	0.485574	-0.003039	0.006655	-4.6e-05	-4.1e-05	0.000339	-0.000165	0.000226	-0.00136	0.004745	0.000488
89	-0.016922	-0.010992	-0.013957	0.46839	0.485964	-0.003138	0.006617	-4.8e-05	-4e-05	0.000337	-0.000157	0.000222	-0.001385	0.004571	0.000549
90	-0.017137	-0.011183	-0.01416	0.468583	0.486207	-0.00319	0.006568	-4.8e-05	-3.7e-05	0.00033	-0.000153	0.00022	-0.001411	0.004362	0.000577
91	-0.017369	-0.011543	-0.014456	0.469215	0.485896	-0.003177	0.006512	-4.8e-05	-3.3e-05	0.000322	-0.000152	0.000219	-0.00143	0.004128	0.000547
92	-0.017623	-0.012065	-0.014844	0.470311	0.485045	-0.003128	0.006474	-4.7e-05	-2.8e-05	0.000313	-0.000154	0.00022	-0.001441	0.003923	0.00048
93	-0.017662	-0.012657	-0.0151595	0.470334	0.485131	-0.003034	0.006459	-4.6e-05	-1.8e-05	0.0003	-0.000158	0.000221	-0.001437	0.00372	0.000362
94	-0.017777	-0.013368	-0.0155725	0.471734	0.483726	-0.002861	0.006415	-4.9e-05	-7e-06	0.00029	-0.000165	0.000225	-0.00143	0.003509	0.000222
95	-0.017886	-0.01416	-0.016023	0.473265	0.482211	-0.002704	0.006416	-4.7e-05	8e-06	0.000278	-0.000175	0.00023	-0.001403	0.003377	8.2e-05
96	-0.018026	-0.015029	-0.0165275	0.474866	0.48056	-0.002528	0.006437	-4.6e-05	2.9e-05	0.000265	-0.000188	0.000237	-0.001366	0.003279	-4.8e-05
97	-0.018103	-0.015903	-0.017003	0.476321	0.479034	-0.00235	0.00646	-4.5e-05	5.4e-05	0.000249	-0.000202	0.000244	-0.001325	0.003222	-0.00015
98	-0.017987	-0.016587	-0.017287	0.47609	0.479371	-0.002296	0.006549	-3.7e-05	9.3e-05	0.000225	-0.000212	0.000246	-0.001279	0.003268	-0.000183
99	-0.017887	-0.017325	-0.017606	0.47706	0.47841	-0.00215	0.006561	-3.7e-05	0.000126	0.000206	-0.000226	0.00025	-0.001239	0.003329	-0.000219
100	-0.017727	-0.017888	-0.0178075	0.477008	0.47856	-0.002094	0.006583	-3.2e-05	0.000165	0.000184	-0.000237	0.000252	-0.001199	0.003495	-0.000207
101	-0.01761	-0.018513	-0.0180615	0.478083	0.477773	-0.002018	0.006568	-2.8e-05	0.000195	0.000168	-0.000247	0.000255	-0.001162	0.003707	-0.000173
102	-0.017458	-0.018991	-0.0182245	0.478713	0.477573	-0.002009	0.006563	-1.9e-05	0.00022	0.000155	-0.000253	0.000255	-0.001128	0.003959	-0.000106
103	-0.01728	-0.01925	-0.018265	0.479	0.477826	-0.002032	0.006551	-6e-06	0.000235	0.000148	-0.000255	0.000254	-0.001099	0.004217	-2.6e-05
104	-0.017084	-0.019369	-0.0182265	0.479013	0.478389	-0.002102	0.006539	1e-05	0.000239	0.000145	-0.000255	0.000252	-0.001073	0.00449	7.5e-05
105	-0.016826	-0.019337	-0.0180815	0.478495	0.479551	-0.002223	0.006531	3e-05	0.000234	0.000145	-0.000249	0.000249	-0.001054	0.004742	0.000196
106	-0.016613	-0.019163	-0.017888	0.477964	0.480801	-0.002352	0.006525	4.9e-05	0.000221	0.000148	-0.000241	0.000244	-0.001045	0.004926	0.00034
107	-0.016411	-0.01883	-0.0176205	0.477311	0.482197	-0.002479	0.006523	6.8e-05	0.000202	0.000151	-0.000231	0.00024	-0.001043	0.005063	0.000475
108	-0.016263	-0.018283	-0.017273	0.476318	0.483884	-0.002618	0.006523	8.1e-05	0.000181	0.000154	-0.000221	0.000237	-0.00105	0.005155	0.000595
109	-0.016168	-0.017629	-0.0168985	0.474771	0.486014	-0.002788	0.006537	9.3e-05	0.000162	0.000157	-0.000211	0.000234	-0.001064	0.005218	0.00071
110	-0.01618	-0.01693	-0.016555	0.473601	0.487628	-0.002943	0.006548	9.9e-05	0.000143	0.00016	-0.000205	0.000236	-0.001083	0.005291	0.000809
111	-0.016222	-0.016223	-0.0162225	0.472277	0.489176	-0.003045	0.006526	9.4e-05	0.000128	0.000162	-0.000202	0.000236	-0.001112	0.005311	0.000847
112	-0.016313	-0.015492	-0.0159025	0.47098	0.490569	-0.003111	0.006492	8.1e-05	0.000116	0.000164	-0.000205	0.000239	-0.001142	0.005362	0.000828
113	-0.016501	-0.014805	-0.015653	0.470006	0.491501	-0.003147	0.006439	6.2e-05	0.000108	0.000165	-0.000211	0.000245	-0.001174	0.005423	0.000773
114	-0.016752	-0.014177	-0.0154645	0.469062	0.492208	-0.003138	0.006355	3.8e-05	0.000103	0.000166	-0.00022	0.000251	-0.001205	0.005483	0.000688
115	-0.016983	-0.01358	-0.0152815	0.468238	0.492565	-0.003084	0.006243	1.2e-05	9.9e-05	0.000168	-0.000234	0.00026	-0.001236	0.005544	0.000579
116	-0.017216	-0.01305	-0.015133	0.467827	0.492445	-0.003028	0.006131	-1.2e-05	9.5e-05	0.000174	-0.00025	0.00027	-0.001261	0.005634	0.000462
117	-0.017346	-0.012544	-0.014945	0.467276	0.49234	-0.002956	0.006021	-3.3e-05	9.2e-05	0.00018	-0.000267	0.000281	-0.001284	0.005714	0.000335
118	-0.01733	-0.012127	-0.0147285	0.467027	0.491874	-0.002863	0.005913	-5e-05	8.7e-05	0.000189	-0.000283	0.000293	-0.001305	0.005812	0.000209
119	-0.017203	-0.011811	-0.014507	0.466974	0.491191	-0.002777	0.005823	-6.3e-05	8.1e-05	0.0002	-0.000298	0.000303	-0.001328	0.005917	9.3e-05
120	-0.016978	-0.011709	-0.0143435	0.467318	0.490142	-0.002684	0.00573	-7.2e-05	7.4e-05	0.000211	-0.000309	0.000312	-0.001355	0.005982	-3e-06
121	-0.016671	-0.011675	-0.014173	0.467594	0.489252	-0.002623	0.00567	-7.4e-05	6.8e-05	0.000221	-0.000315	0.000317	-0.001382	0.006053	-6.1e-05
122	-0.016319	-0.011851	-0.014085	0.467814	0.488578	-0.002592	0.005661	-7.1e-05	6.6e-05	0.000225	-0.000314	0.000318	-0.001406	0.006122	-8.8e-05
123	-0.016015	-0.012308	-0.0141615	0.468966	0.48719	-0.002552	0.005661	-6.6e-05	6.5e-05	0.000226	-0.000308	0.000315	-0.001426	0.006159	-9e-05
124	-0.015674	-0.012859	-0.0142665	0.469902	0.486229	-0.002546	0.005696	-5.8e-05	6.9e-05	0.000219	-0.000296	0.000309	-0.001437	0.006193	-5.7e-05
125	-0.015294	-0.013485	-0.0143895	0.470361	0.485957	-0.002602	0.005796	-4.6e-05	8.1e-05	0.000205	-0.000279	0.000299	-0.001438	0.006223	3.3e-05
126	-0.014931	-0.014224	-0.0145775	0.470938	0.485638	-0.002657	0.005901	-3.1e-05	9.6e-05	0.000189	-0.000261	0.000289	-0.001432	0.006244	0.000158
127	-0.014585	-0.014996	-0.0147905	0.471017	0.485895	-0.002727	0.00601	-1.5e-05	0.000115	0.000171	-0.000243	0.000279	-0.001421	0.006218	0.000323
128	-0.014323	-0.015756	-0.0150395	0.471129	0.48622	-0.002823	0.006136	2e-06	0.000137	0.000153	-0.000225	0.00027	-0.001402	0.006157	0.000535
129	-0.014081	-0.016582	-0.0153315	0.471504	0.486166	-0.002883	0.006224	1.7e-05	0.000157	0.000139	-0.000211	0.000263	-0.001381	0.006055	0.000742
130	-0.01382	-0.017338	-0.015579	0.471773	0.48618	-0.002924	0.0063	3.3e-05	0.000173	0.000127	-0.000201	0.000258	-0.001358	0.005925	0.000951
131	-0.013547	-0.017958	-0.0157525	0.471762	0.486429	-0.002938	0.006358	4.9e-05	0.000187	0.000117	-0.000196	0.000256	-0.001334	0.005817	0.001126
132	-0.013281	-0.018449	-0.015865	0.471749	0.486623	-0.002906	0.006391	6.4e-05	0.000195	0.000109	-0.000197	0.000256	-0.001313	0.005742	0.001258
133	-0.013056	-0.018705	-0.0158805	0.470728	0.487936	-0.002909	0.006446	8.2e-05	0.000205	0.0001	-0.000201	0.000258	-0.001287	0.005746	0.001364
134	-0.012937	-0.018875	-0.015906	0.469669	0.489216	-0.002894	0.006489	9.8e-05	0.000212	9.1e-05	-0.000211	0.000263	-0.00126	0.005794	0.001418
135	-0.012953	-0.01907	-0.0160115	0.469633	0.489258	-0.002776	0.006477	0.00011	0.000206	8.8e-05	-0.000229	0.000271	-0.00124	0.005874	0.001406
136	-0.013081	-0.019186	-0.0161335	0.469369	0.48944	-0.002685	0.006491	0.000123	0.000197	8.5e-05	-0.000253	0.000283	-0.001213	0.006053	0.001352
137	-0.013324	-0.019301	-0.0163125	0.46923	0.489259	-0.002575	0.006505	0.000133	0.000183	8.6e-05	-0.00028	0.000298	-0.001189	0.006267	0.001254
138	-0.013733	-0.019425	-0.016579	0.46993	0.48813	-0.002426	0.00651	0.00014	0.000163	9e-05	-0.000307	0.000314	-0.001177	0.006432	0.001148
139	-0.014178	-0.019474	-0.016826	0.470284	0.487216	-0.002302	0.00654	0.000145	0.000144	9.6e-05	-0.00033	0.000329	-0.001171	0.006624	0.001025
140	-0.014606	-0.01944	-0.017023	0.470531	0.486413	-0.002215	0.006586	0.000147	0.000128	0.000105	-0.000347	0.000344	-0.001174	0.006853	0.000899
141	-0.015184	-0.019502	-0.017343	0.471755	0.484566	-0.00212	0.006631	0.000141	0.000113	0.000114	-0.000357	0.000358	-0.001187	0.007092	0.000765
142	-0.015785	-0.019601	-0.017693	0.472757	0.482815	-0.00205	0.006691	0.00013	0.0001	0.000122	-0.000359	0.000369	-0.001208	0.007331	0.000617
143	-0.016345	-0.019662	-0.0180035	0.473418	0.481576	-0.002059	0.006786	0.000119	9.1e-05	0.000127	-0.000352	0.000374	-0.001234	0.007598	0.000498
144	-0.017055	-0.019748	-0.0184015	0.474966	0.479629	-0.002124	0.006898	0.000108	8.1e-05	0.000131	-0.000337	0.000377	-0.00126	0.00791	0.000403
145	-0.017588	-0.019818	-0.018703	0.475829	0.478491	-0.002203	0.006999	9.2e-05	7.4e-05	0.000132	-0.000316	0.000373	-0.001297	0.008117	0.00033
146	-0.01807	-0.019886	-0.018978	0.476759	0.477561	-0.002319	0.007094	8e-05	6.9e-05	0.00013	-0.000292	0.000366	-0.001335	0.008277	0.000302
147	-0.018477	-0.019906	-0.0191915	0.4775	0.477022	-0.002475	0.007188	7.1e-05	6.8e-05	0.000125	-0.000268	0.000356	-0.001379	0.008365	0.00033
148	-0.018793	-0.019988	-0.0193905	0.478222	0.476633	-0.002664	0.007288	6.8e-05	6.8e-05	0.000117	-0.000246	0.000344	-0.001422	0.008412	0.00041
149	-0.019026	-0.020036	-0.019531	0.478752	0.476494	-0.002856	0.007388	6.9e-05	7.1e-05	0.000107	-0.000226	0.000333	-0.001465	0.008384	0.000525
150	-0.019211	-0.020051	-0.019631	0.479315	0.476333	-0.003015	0.007467	7.6e-05	7.7e-05	9.6e-05	-0.000212	0.000322	-0.001504	0.008246	0.000665
151	-0.019426	-0.020056	-0.019741	0.480025	0.476	-0.003134	0.007522	8.7e-05	8.4e-05	8.3e-05	-0.000201	0.000312	-0.00154	0.008005	0.000809
152	-0.019456	-0.020027	-0.0197415	0.479471	0.476932	-0.003239	0.00757	0.000104	0.0001	6.6e-05	-0.000194	0.000301	-0.001563	0.007679	0.00095
153	-0.019667	-0.020005	-0.019836	0.481215	0.47555	-0.003246	0.007526	0.000122	0.000111	5.2e-05	-0.000192	0.000294	-0.001578	0.007315	0.001105
154	-0.019749	-0.019903	-0.019826	0.481594	0.475497	-0.003184	0.00744	0.000139	0.000131	3.6e-05	-0.000195	0.000286	-0.00157	0.006945	0.00121
155	-0.019864	-0.019856	-0.01986	0.482298	0.47509	-0.003038	0.007286	0.000153	0.000152	1.9e-05	-0.000205	0.000278	-0.001545	0.006597	0.001263
156	-0.019947	-0.019758	-0.0198525	0.48215	0.475436	-0.002873	0.007107	0.000165	0.000179	-2e-06	-0.000218	0.000272	-0.001496	0.0063	0.001256
157	-0.020091	-0.019615	-0.019853	0.481967	0.475792	-0.002703	0.00693	0.000176	0.000204	-2e-05	-0.000236	0.00027	-0.001431	0.006119	0.001205
158	-0.020166	-0.019443	-0.0198045	0.481497	0.476462	-0.002545	0.006764	0.000186	0.000226	-3.4e-05	-0.000259	0.000273	-0.001357	0.006031	0.001126
159	-0.02024	-0.019292	-0.019766	0.481024	0.477046	-0.002379	0.006622	0.00019	0.000242	-4.3e-05	-0.000283	0.000279	-0.001289	0.006029	0.001001
160	-0.020251	-0.019205	-0.019728	0.480724	0.477334	-0.002205	0.006511	0.000194	0.00025	-4.5e-05	-0.000306	0.000289	-0.001236	0.006127	0.000846
161	-0.020229	-0.01912	-0.0196745	0.480482	0.477548	-0.002062	0.006461	0.0002	0.000253	-4.2e-05	-0.000324	0.000302	-0.001194	0.006355	0.00065
162	-0.020119	-0.019043	-0.019581	0.479989	0.477771	-0.001957	0.006462	0.000209	0.000251	-3.4e-05	-0.000336	0.000315	-0.001166	0.006686	0.000428
163	-0.019951	-0.018965	-0.019458	0.479784	0.477567	-0.001848	0.006492	0.000216	0.000245	-2.2e-05	-0.00034	0.000328	-0.001154	0.007069	0.000167
164	-0.019798	-0.018975	-0.0193865	0.479787	0.477039	-0.001761	0.006565	0.000224	0.000237	-1.2e-05	-0.000335	0.000339	-0.001149	0.007509	-0.000118
165	-0.019551	-0.018987	-0.019269	0.479926	0.476405	-0.00171	0.006684	0.000231	0.00023	-7e-06	-0.000324	0.000349	-0.001145	0.00798	-0.000422
166	-0.019271	-0.019065	-0.019168	0.480189	0.475664	-0.001691	0.006833	0.000239	0.000223	-4e-06	-0.000309	0.000356	-0.001139	0.008435	-0.000708
167	-0.018983	-0.019237	-0.01911	0.480982	0.474555	-0.001688	0.006996	0.000243	0.000216	-5e-06	-0.000292	0.000361	-0.001138	0.008851	-0.000947
168	-0.018625	-0.019396	-0.0190105	0.481461	0.47385	-0.00175	0.007169	0.000246	0.000211	-8e-06	-0.000275	0.000364	-0.001141	0.00919	-0.001099
169	-0.018264	-0.019524	-0.018894	0.481625	0.473558	-0.001894	0.007358	0.00025	0.00021	-1.4e-05	-0.000258	0.000366	-0.001146	0.009414	-0.001155
170	-0.017849	-0.01974	-0.0187945	0.482209	0.472857	-0.00202	0.007501	0.000249	0.000207	-2e-05	-0.000244	0.000364	-0.001167	0.009469	-0.001143
171	-0.017436	-0.019934	-0.018685	0.482732	0.4724	-0.002155	0.007603	0.000249	0.000204	-2.4e-05	-0.000233	0.000361	-0.001195	0.009391	-0.001058
172	-0.017151	-0.020132	-0.0186415	0.48353	0.471596	-0.002273	0.007653	0.000247	0.000201	-2.6e-05	-0.000228	0.000355	-0.00123	0.00922	-0.000924
173	-0.016841	-0.020257	-0.018549	0.483563	0.471502	-0.002426	0.007676	0.000248	0.000199	-2.8e-05	-0.000226	0.000348	-0.001267	0.008964	-0.000725
174	-0.016598	-0.020363	-0.0184805	0.483635	0.471284	-0.002554	0.007666	0.000251	0.000195	-2.7e-05	-0.00023	0.00034	-0.001304	0.008665	-0.000501
175	-0.016356	-0.020428	-0.018392	0.483042	0.471555	-0.002666	0.007628	0.000258	0.000189	-2.4e-05	-0.000238	0.00033	-0.001338	0.008306	-0.000249
176	-0.016106	-0.020386	-0.018246	0.481781	0.472242	-0.002737	0.007561	0.000269	0.000182	-1.9e-05	-0.000251	0.000321	-0.001365	0.007907	8e-06
177	-0.015888	-0.020268	-0.018078	0.480261	0.473126	-0.002774	0.007477	0.000283	0.000171	-1.2e-05	-0.000267	0.000312	-0.00138	0.007479	0.00028
178	-0.015742	-0.020097	-0.0179195	0.478607	0.474004	-0.002771	0.007391	0.0003	0.00016	-1e-06	-0.000287	0.000305	-0.001379	0.007085	0.000535
179	-0.015596	-0.019766	-0.017681	0.475767	0.476071	-0.002792	0.007332	0.000323	0.000154	1.1e-05	-0.000307	0.000298	-0.001353	0.006783	0.000756
180	-0.015562	-0.01941	-0.017486	0.473241	0.47768	-0.002738	0.007246	0.000341	0.000147	2.7e-05	-0.000326	0.000293	-0.001316	0.006525	0.000926
181	-0.015699	-0.01892	-0.0173095	0.471062	0.478981	-0.002671	0.007173	0.000356	0.000143	4.7e-05	-0.000345	0.000292	-0.001273	0.006402	0.001031
182	-0.015912	-0.01846	-0.017186	0.469305	0.479763	-0.002492	0.007049	0.000359	0.000142	6.7e-05	-0.000359	0.000291	-0.001246	0.006268	0.001056
183	-0.016213	-0.017873	-0.017043	0.467397	0.480839	-0.002344	0.006949	0.000358	0.000151	8.4e-05	-0.000369	0.000291	-0.001216	0.006238	0.001014
184	-0.016544	-0.017252	-0.016898	0.465721	0.48165	-0.002184	0.006847	0.000351	0.000166	9.9e-05	-0.000374	0.000295	-0.001196	0.006325	0.000895
185	-0.016871	-0.016652	-0.0167615	0.464708	0.481857	-0.001951	0.006724	0.000334	0.000186	0.000109	-0.000374	0.0003	-0.001198	0.006483	0.000708
186	-0.017209	-0.01603	-0.0166195	0.464185	0.48177	-0.001771	0.006638	0.000316	0.000209	0.000118	-0.00037	0.000308	-0.001213	0.006836	0.000504
187	-0.017525	-0.015445	-0.016485	0.463987	0.481567	-0.00162	0.006581	0.000296	0.000235	0.000121	-0.000364	0.000319	-0.001239	0.007301	0.000285
188	-0.017888	-0.014847	-0.0163675	0.46387	0.481531	-0.001518	0.006549	0.000276	0.000264	0.000115	-0.000355	0.00033	-0.001272	0.007827	6.7e-05
189	-0.018251	-0.014374	-0.0163125	0.464039	0.481502	-0.001467	0.00653	0.000258	0.000294	0.000101	-0.000345	0.000342	-0.001308	0.008348	-0.000109
190	-0.018712	-0.014044	-0.016378	0.464789	0.481154	-0.001432	0.006517	0.000243	0.000318	8e-05	-0.000333	0.000353	-0.001347	0.008829	-0.000236
191	-0.019124	-0.013775	-0.0164495	0.465362	0.481308	-0.001442	0.006515	0.000232	0.000336	5.4e-05	-0.000322	0.000361	-0.001377	0.009234	-0.000304
192	-0.019575	-0.013663	-0.016619	0.466468	0.481204	-0.001474	0.006508	0.000226	0.000343	2.5e-05	-0.000313	0.000368	-0.001398	0.009524	-0.000295
193	-0.019848	-0.013635	-0.0167415	0.467334	0.481615	-0.001578	0.006517	0.000228	0.000341	-5e-06	-0.000306	0.000372	-0.001407	0.009718	-0.000205
194	-0.019979	-0.013751	-0.016865	0.468033	0.482329	-0.001704	0.006521	0.000235	0.000332	-3.1e-05	-0.000302	0.000374	-0.001406	0.009834	-6.4e-05
195	-0.020039	-0.013981	-0.01701	0.469222	0.482684	-0.001861	0.006528	0.000246	0.000315	-5.4e-05	-0.0003	0.000372	-0.001394	0.00986	0.000136
196	-0.01997	-0.014355	-0.0171625	0.470433	0.482978	-0.002033	0.00653	0.000258	0.000294	-7e-05	-0.000299	0.000369	-0.00138	0.009772	0.000387
197	-0.019758	-0.014798	-0.017278	0.47144	0.483379	-0.002213	0.006529	0.000269	0.000271	-7.8e-05	-0.000302	0.000365	-0.001363	0.009637	0.000652
198	-0.01949	-0.015248	-0.017369	0.472259	0.483868	-0.002395	0.006529	0.00028	0.00025	-7.7e-05	-0.000308	0.00036	-0.001344	0.00942	0.000924
199	-0.01923	-0.015847	-0.0175385	0.474192	0.483029	-0.002491	0.006495	0.000286	0.000222	-6.2e-05	-0.000317	0.000358	-0.001334	0.009127	0.001187
200	-0.01895	-0.016472	-0.017711	0.476203	0.481986	-0.00258	0.006477	0.000289	0.000194	-4e-05	-0.000326	0.000354	-0.001327	0.008794	0.001416
201	-0.018742	-0.017138	-0.01794	0.478179	0.480878	-0.002649	0.006477	0.000289	0.00017	-1.2e-05	-0.000331	0.00035	-0.00132	0.008432	0.00161
202	-0.018514	-0.017845	-0.0181795	0.480534	0.479281	-0.002664	0.006471	0.000284	0.000148	1.8e-05	-0.000336	0.000347	-0.001319	0.008083	0.001753
203	-0.018302	-0.018535	-0.0184185	0.482832	0.477541	-0.002639	0.006468	0.000276	0.000131	4.8e-05	-0.000338	0.000346	-0.001325	0.0078	0.001845
204	-0.018167	-0.019186	-0.0186765	0.48531	0.475407	-0.00256	0.006465	0.000263	0.000119	7.5e-05	-0.000339	0.000345	-0.001335	0.007605	0.00188
205	-0.018101	-0.019833	-0.018967	0.488421	0.472535	-0.002413	0.006451	0.000246	0.000108	0.000101	-0.000339	0.000349	-0.001357	0.007498	0.001868
206	-0.017899	-0.020286	-0.0190925	0.490143	0.471018	-0.002296	0.00646	0.000231	0.00011	0.00012	-0.000339	0.000356	-0.001378	0.007543	0.001814
207	-0.017709	-0.020636	-0.0191725	0.491349	0.469882	-0.00217	0.00646	0.000215	0.000119	0.000135	-0.000337	0.000366	-0.001403	0.007702	0.001739
208	-0.017524	-0.020859	-0.0191915	0.49195	0.46906	-0.002	0.006422	0.000199	0.000135	0.000145	-0.000336	0.000377	-0.001436	0.007925	0.001662
209	-0.017351	-0.020994	-0.0191725	0.493203	0.467548	-0.001807	0.006346	0.000183	0.000152	0.000154	-0.000338	0.000393	-0.001472	0.008263	0.001601
210	-0.017117	-0.020876	-0.0189965	0.492661	0.467735	-0.001693	0.006275	0.00017	0.000179	0.000155	-0.00034	0.000411	-0.001493	0.008696	0.001557
211	-0.016989	-0.020737	-0.018863	0.49204	0.467978	-0.001583	0.006188	0.000157	0.000209	0.000151	-0.000342	0.000428	-0.001502	0.009128	0.00155
212	-0.016855	-0.020471	-0.018663	0.490392	0.46919	-0.001535	0.006103	0.000145	0.000246	0.00014	-0.000342	0.000443	-0.001492	0.009591	0.001575
213	-0.016785	-0.020044	-0.0184145	0.488377	0.470685	-0.001502	0.005998	0.000133	0.00028	0.000127	-0.000342	0.000454	-0.001468	0.010001	0.001637
214	-0.016716	-0.019561	-0.0181385	0.485781	0.472722	-0.001516	0.005887	0.000123	0.000312	0.00011	-0.000339	0.000462	-0.001424	0.010345	0.001716
215	-0.016653	-0.018963	-0.017808	0.482744	0.475226	-0.001569	0.005784	0.000117	0.000337	9.2e-05	-0.000336	0.000466	-0.001368	0.01063	0.001808
216	-0.016606	-0.018318	-0.017462	0.479561	0.47788	-0.00163	0.00569	0.000115	0.000354	7.3e-05	-0.00033	0.000465	-0.001309	0.010832	0.001923
217	-0.016568	-0.017664	-0.017116	0.476574	0.480505	-0.001711	0.005629	0.00012	0.000362	5.4e-05	-0.000322	0.000462	-0.001236	0.011023	0.002037
218	-0.016482	-0.017008	-0.016745	0.473651	0.483108	-0.001787	0.005582	0.000131	0.00036	3.6e-05	-0.000312	0.000456	-0.001163	0.011159	0.002151
219	-0.016422	-0.016456	-0.016439	0.471325	0.485139	-0.001846	0.005553	0.00015	0.000345	2.2e-05	-0.000301	0.000449	-0.001103	0.011218	0.002261
220	-0.016385	-0.015944	-0.0161645	0.468883	0.487315	-0.001919	0.005557	0.000172	0.000327	8e-06	-0.000289	0.00044	-0.001056	0.011197	0.002348
221	-0.016303	-0.015464	-0.0158835	0.466393	0.489493	-0.002003	0.005592	0.000197	0.000307	-5e-06	-0.000277	0.000429	-0.001033	0.011056	0.002423
222	-0.016235	-0.015155	-0.015695	0.465002	0.490508	-0.00206	0.00565	0.000217	0.000286	-1.6e-05	-0.000265	0.00042	-0.001037	0.010859	0.002462
223	-0.016029	-0.014895	-0.015462	0.46276	0.492319	-0.00212	0.005753	0.000232	0.00027	-2.9e-05	-0.00025	0.000407	-0.001063	0.01059	0.002445
224	-0.015912	-0.014764	-0.015338	0.462215	0.492478	-0.002164	0.005878	0.000239	0.000255	-3.7e-05	-0.000231	0.000394	-0.001102	0.01033	0.002405
225	-0.015788	-0.01468	-0.015234	0.462243	0.492213	-0.002207	0.006043	0.000237	0.000247	-4.4e-05	-0.000209	0.000381	-0.00115	0.01011	0.002286
226	-0.015757	-0.014654	-0.0152055	0.462577	0.491598	-0.00223	0.006238	0.000228	0.000242	-4.5e-05	-0.000189	0.000371	-0.001203	0.010008	0.002068
227	-0.01575	-0.014608	-0.015179	0.462966	0.490896	-0.002232	0.006443	0.000214	0.000242	-3.9e-05	-0.000169	0.000362	-0.001276	0.00994	0.001777
228	-0.015688	-0.014545	-0.0151165	0.463463	0.490136	-0.002243	0.006655	0.000197	0.000247	-2.7e-05	-0.000149	0.000358	-0.001351	0.009933	0.001443
229	-0.015608	-0.014507	-0.0150575	0.463878	0.489423	-0.002251	0.006865	0.000182	0.000254	-9e-06	-0.000132	0.000359	-0.001427	0.009982	0.001065
230	-0.015396	-0.014417	-0.0149065	0.462898	0.490129	-0.002312	0.007085	0.000171	0.000269	9e-06	-0.000117	0.000363	-0.001487	0.010087	0.000672
231	-0.015272	-0.014357	-0.0148145	0.463091	0.489723	-0.002319	0.007252	0.000164	0.000282	3e-05	-0.000105	0.000366	-0.001543	0.010152	0.000304
232	-0.015121	-0.014276	-0.0146985	0.46338	0.489321	-0.002303	0.007372	0.000162	0.000295	4.9e-05	-9.3e-05	0.000365	-0.001596	0.010126	-5e-06
233	-0.014839	-0.01414	-0.0144895	0.463605	0.4892	-0.002301	0.007449	0.000163	0.000309	6.7e-05	-8.6e-05	0.000365	-0.001646	0.010039	-0.000254
234	-0.014414	-0.013886	-0.01415	0.463433	0.489709	-0.002323	0.007468	0.000167	0.000327	7.9e-05	-7.9e-05	0.000363	-0.001686	0.00987	-0.000393
235	-0.013929	-0.013561	-0.013745	0.463259	0.490307	-0.002319	0.00741	0.000171	0.000344	8.1e-05	-7.5e-05	0.00036	-0.001718	0.009682	-0.000453
236	-0.013331	-0.013158	-0.0132445	0.462881	0.491246	-0.002318	0.007294	0.000173	0.000364	7.3e-05	-7e-05	0.000356	-0.001734	0.009489	-0.000442
237	-0.012676	-0.012703	-0.0126895	0.462499	0.49231	-0.002349	0.007139	0.000173	0.000385	5.3e-05	-5.7e-05	0.000352	-0.001725	0.009288	-0.000337
238	-0.01201	-0.012206	-0.012108	0.461459	0.493961	-0.002352	0.006936	0.000172	0.000405	2.5e-05	-5e-05	0.000347	-0.001707	0.009118	-0.000237
239	-0.011333	-0.011661	-0.011497	0.460945	0.495058	-0.002317	0.006685	0.000171	0.000417	-7e-06	-4.7e-05	0.000342	-0.001688	0.008965	-0.000129
240	-0.010643	-0.010993	-0.010818	0.460148	0.496634	-0.002371	0.00648	0.000173	0.000435	-4.5e-05	-3.4e-05	0.000343	-0.001638	0.008974	1.1e-05
241	-0.009861	-0.010426	-0.0101435	0.458356	0.498968	-0.002387	0.006279	0.000181	0.000447	-7.6e-05	-3.3e-05	0.000347	-0.001605	0.009024	8.1e-05
242	-0.009087	-0.009938	-0.0095125	0.456547	0.501244	-0.002378	0.006095	0.000195	0.000456	-9.6e-05	-3.9e-05	0.000353	-0.001574	0.009169	8.7e-05
243	-0.008417	-0.00953	-0.0089735	0.454977	0.503097	-0.002356	0.005969	0.000217	0.000462	-0.000107	-5.1e-05	0.000363	-0.00154	0.009464	9e-06
244	-0.00789	-0.009246	-0.008568	0.453794	0.504397	-0.00231	0.005885	0.000245	0.000464	-0.000108	-6.9e-05	0.000378	-0.001511	0.009917	-0.000171
245	-0.007473	-0.00908	-0.0082765	0.452849	0.505385	-0.002275	0.005879	0.000278	0.000467	-9.7e-05	-9.1e-05	0.000395	-0.001482	0.010496	-0.000438
246	-0.007199	-0.009072	-0.0081355	0.452413	0.505842	-0.002234	0.005935	0.000312	0.000465	-7.1e-05	-0.000116	0.000414	-0.001459	0.011172	-0.000786
247	-0.007055	-0.009152	-0.0081035	0.452167	0.506037	-0.002166	0.006038	0.000343	0.000458	-3e-05	-0.000149	0.000432	-0.001445	0.011885	-0.001231
248	-0.007092	-0.009457	-0.0082745	0.453077	0.505224	-0.002114	0.006214	0.000363	0.000445	2.1e-05	-0.000177	0.000448	-0.00142	0.012679	-0.001706
249	-0.007272	-0.009907	-0.0085895	0.454269	0.504112	-0.002066	0.006439	0.000372	0.000429	7.8e-05	-0.000202	0.000462	-0.001391	0.01341	-0.002166
250	-0.007633	-0.01061	-0.0091215	0.456465	0.501907	-0.001976	0.006682	0.000369	0.000403	0.000132	-0.000224	0.000469	-0.001369	0.013983	-0.002607
251	-0.008212	-0.011311	-0.0097615	0.459132	0.49933	-0.001906	0.006964	0.000356	0.000383	0.000174	-0.000236	0.000469	-0.001335	0.01444	-0.002985
252	-0.00895	-0.012024	-0.010487	0.461468	0.497046	-0.001863	0.007252	0.000337	0.000372	0.000195	-0.00024	0.000462	-0.001294	0.014698	-0.003238
253	-0.009852	-0.012886	-0.011369	0.464444	0.494109	-0.001795	0.007498	0.000315	0.000364	0.000198	-0.000239	0.000447	-0.001252	0.014765	-0.003373
254	-0.010859	-0.013737	-0.012298	0.467468	0.491068	-0.001726	0.0077	0.000292	0.000361	0.000181	-0.000234	0.000427	-0.001209	0.014656	-0.003387
255	-0.011901	-0.014553	-0.013227	0.470177	0.488245	-0.001656	0.007841	0.000272	0.000363	0.000149	-0.000228	0.000402	-0.00117	0.014386	-0.003296
256	-0.012945	-0.01527	-0.0141075	0.472436	0.485873	-0.001619	0.007917	0.000257	0.000369	0.000106	-0.00022	0.000377	-0.001131	0.013917	-0.003048
257	-0.014067	-0.015952	-0.0150095	0.474519	0.483599	-0.001583	0.007918	0.000247	0.000377	5.6e-05	-0.000213	0.000349	-0.001097	0.013258	-0.002669
258	-0.015194	-0.01664	-0.015917	0.476465	0.48148	-0.001588	0.007855	0.000245	0.000384	6e-06	-0.000204	0.000323	-0.00106	0.012437	-0.002145
259	-0.016349	-0.017269	-0.016809	0.477838	0.4798	-0.001609	0.007734	0.000247	0.000392	-4.6e-05	-0.000195	0.000297	-0.001024	0.011492	-0.001543
260	-0.017442	-0.017839	-0.0176405	0.478832	0.478389	-0.00166	0.007586	0.000251	0.0004	-9.6e-05	-0.000183	0.000273	-0.000989	0.010505	-0.000917
261	-0.018443	-0.018342	-0.0183925	0.479679	0.477073	-0.001728	0.007421	0.000257	0.000407	-0.000142	-0.000171	0.000255	-0.000965	0.009543	-0.000307
262	-0.019352	-0.018918	-0.019135	0.481005	0.475177	-0.001761	0.007228	0.000264	0.000407	-0.00018	-0.000158	0.000241	-0.000964	0.008592	0.000274
263	-0.020167	-0.01932	-0.0197435	0.481388	0.474093	-0.001839	0.007052	0.000273	0.00041	-0.000209	-0.000143	0.000233	-0.000976	0.007766	0.000803
264	-0.020864	-0.019683	-0.0202735	0.481566	0.473144	-0.001923	0.006893	0.000284	0.000413	-0.000231	-0.000125	0.00023	-0.001011	0.007068	0.001262
265	-0.021522	-0.020073	-0.0207975	0.48179	0.472011	-0.001985	0.006756	0.000297	0.000414	-0.000239	-0.000109	0.000235	-0.001068	0.006557	0.00162
266	-0.022093	-0.020459	-0.021276	0.481732	0.471038	-0.00202	0.006629	0.000313	0.000413	-0.000233	-9.5e-05	0.000243	-0.001146	0.006179	0.001893
267	-0.022467	-0.020789	-0.021628	0.481439	0.470441	-0.002053	0.006539	0.000331	0.000409	-0.000215	-8.5e-05	0.000258	-0.001234	0.005993	0.002073
268	-0.02278	-0.021093	-0.0219365	0.48105	0.469906	-0.00206	0.006467	0.000349	0.000403	-0.000187	-8e-05	0.000275	-0.001321	0.005982	0.002173
269	-0.022904	-0.02132	-0.022112	0.480594	0.469654	-0.002045	0.006428	0.000361	0.000397	-0.000155	-8e-05	0.000291	-0.00139	0.006131	0.002195
270	-0.022864	-0.021459	-0.0221615	0.480469	0.469317	-0.001973	0.006398	0.000365	0.000387	-0.000119	-8.4e-05	0.000303	-0.001426	0.006401	0.002163
271	-0.022628	-0.021535	-0.0220815	0.480309	0.469403	-0.00192	0.006422	0.000365	0.000379	-8.1e-05	-9.2e-05	0.000315	-0.001413	0.006769	0.002069
272	-0.022249	-0.021544	-0.0218965	0.480427	0.469554	-0.001841	0.006474	0.000358	0.000371	-4.5e-05	-0.000105	0.000325	-0.001355	0.007186	0.001908
273	-0.021781	-0.021464	-0.0216225	0.480968	0.46976	-0.001786	0.006566	0.000346	0.000369	-1.8e-05	-0.000119	0.000333	-0.001272	0.007646	0.001692
274	-0.021204	-0.02136	-0.021282	0.481961	0.469665	-0.001677	0.006654	0.000328	0.000365	2e-06	-0.000138	0.000338	-0.001195	0.008111	0.001437
275	-0.02052	-0.021311	-0.0209155	0.483427	0.469238	-0.001568	0.006759	0.000309	0.000361	1.5e-05	-0.00016	0.000345	-0.001131	0.008565	0.001165
276	-0.0198	-0.021192	-0.020496	0.484992	0.468824	-0.001471	0.006866	0.000289	0.000358	2e-05	-0.000184	0.000351	-0.001088	0.008968	0.000899
277	-0.019098	-0.021058	-0.020078	0.486625	0.468312	-0.001397	0.006971	0.000271	0.000352	2.1e-05	-0.000209	0.000359	-0.001067	0.00928	0.000667
278	-0.018388	-0.020918	-0.019653	0.487986	0.468042	-0.00137	0.007072	0.000259	0.000347	1.9e-05	-0.000232	0.000364	-0.001052	0.009501	0.000486
279	-0.017738	-0.020813	-0.0192755	0.489384	0.467571	-0.001351	0.007165	0.000252	0.000341	1.5e-05	-0.000251	0.000366	-0.001038	0.009608	0.000378
280	-0.017132	-0.020689	-0.0189105	0.490537	0.467204	-0.001366	0.007251	0.000251	0.000333	1.2e-05	-0.000268	0.000367	-0.001025	0.009632	0.000345
281	-0.01654	-0.020512	-0.018526	0.490665	0.467718	-0.001468	0.007335	0.000256	0.00033	1e-05	-0.000279	0.000367	-0.001014	0.009594	0.000386
282	-0.016084	-0.020381	-0.0182325	0.491169	0.467703	-0.001546	0.007391	0.000266	0.00032	1.3e-05	-0.000289	0.000369	-0.001015	0.00949	0.00048
283	-0.015744	-0.020276	-0.01801	0.491206	0.468057	-0.001716	0.007456	0.000283	0.000311	1.8e-05	-0.000294	0.000373	-0.001011	0.009391	0.000645
284	-0.015661	-0.020295	-0.017978	0.492402	0.467007	-0.001764	0.00745	0.000303	0.000286	3e-05	-0.000303	0.00038	-0.001035	0.009159	0.000868
285	-0.015564	-0.020103	-0.0178335	0.491705	0.467733	-0.001916	0.007452	0.000327	0.000269	3.7e-05	-0.000302	0.000387	-0.001065	0.008871	0.001153
286	-0.015568	-0.019943	-0.0177555	0.490394	0.468612	-0.00197	0.007399	0.000352	0.000243	4.6e-05	-0.000304	0.000396	-0.001129	0.008476	0.00147
287	-0.015742	-0.019791	-0.0177665	0.489369	0.469093	-0.002041	0.007324	0.000378	0.000219	5.3e-05	-0.000301	0.00041	-0.001203	0.008153	0.001804
288	-0.015954	-0.01964	-0.017797	0.487936	0.469736	-0.002089	0.007224	0.000401	0.000196	5.9e-05	-0.000296	0.000428	-0.001305	0.00787	0.002132
289	-0.01627	-0.019501	-0.0178855	0.486022	0.470488	-0.002027	0.007063	0.00042	0.00017	6.5e-05	-0.000293	0.000446	-0.001447	0.007558	0.002449
290	-0.016666	-0.019266	-0.017966	0.484047	0.471139	-0.001984	0.006897	0.000438	0.000151	6.9e-05	-0.000287	0.000466	-0.001593	0.007376	0.002734
291	-0.016922	-0.01902	-0.017971	0.480937	0.47274	-0.00196	0.006718	0.000453	0.00014	7e-05	-0.00028	0.000485	-0.001724	0.007285	0.002974
292	-0.017204	-0.018728	-0.017966	0.477219	0.474691	-0.001912	0.006529	0.000462	0.000136	6.9e-05	-0.000278	0.000501	-0.001843	0.007299	0.003144
293	-0.01752	-0.018428	-0.017974	0.473487	0.476695	-0.001849	0.006337	0.000465	0.000137	6.7e-05	-0.000278	0.000509	-0.001924	0.007375	0.003242
294	-0.017727	-0.018137	-0.017932	0.470052	0.478434	-0.001742	0.006125	0.000457	0.000141	6.5e-05	-0.000285	0.000509	-0.001979	0.007475	0.003268
295	-0.017842	-0.01775	-0.017796	0.465769	0.481186	-0.001673	0.005961	0.000443	0.000155	6.2e-05	-0.000298	0.000499	-0.001989	0.007615	0.003219
296	-0.018087	-0.017357	-0.017722	0.462691	0.483001	-0.001606	0.005834	0.000421	0.000173	6e-05	-0.000315	0.000484	-0.001958	0.007813	0.003109
297	-0.018259	-0.016947	-0.017603	0.460007	0.484658	-0.001555	0.005758	0.000395	0.000195	6e-05	-0.00034	0.000466	-0.001892	0.008057	0.002947
298	-0.01841	-0.01652	-0.017465	0.458026	0.485931	-0.001499	0.005713	0.000371	0.000214	6.4e-05	-0.000371	0.000448	-0.001803	0.008328	0.002761
299	-0.018448	-0.016098	-0.017273	0.456958	0.486659	-0.001446	0.005715	0.00035	0.000229	7e-05	-0.000406	0.000432	-0.001709	0.008621	0.002561
300	-0.018382	-0.015702	-0.017042	0.456374	0.487193	-0.001432	0.005767	0.000336	0.00024	8e-05	-0.000442	0.00042	-0.001613	0.008934	0.002355
301	-0.018246	-0.015438	-0.016842	0.456603	0.487227	-0.001421	0.005853	0.000328	0.000244	8.9e-05	-0.000476	0.00041	-0.001529	0.009252	0.002139
302	-0.018034	-0.015225	-0.0166295	0.457922	0.486513	-0.0014	0.005972	0.000323	0.00024	9.6e-05	-0.000504	0.000404	-0.00147	0.009563	0.001911
303	-0.017802	-0.015044	-0.016423	0.459213	0.486099	-0.001433	0.006138	0.000323	0.000235	0.000101	-0.000522	0.000401	-0.001425	0.009864	0.001679
304	-0.017586	-0.015048	-0.016317	0.461759	0.484704	-0.001538	0.006354	0.000333	0.00022	0.000106	-0.000532	0.000406	-0.001383	0.010209	0.001458
305	-0.0173	-0.015061	-0.0161805	0.463605	0.4841	-0.001673	0.006597	0.000339	0.000205	0.000104	-0.000529	0.00041	-0.001358	0.010459	0.001233
306	-0.017063	-0.015259	-0.016161	0.466294	0.48272	-0.001778	0.006813	0.00034	0.000183	0.0001	-0.000516	0.000418	-0.001358	0.010621	0.001016
307	-0.01677	-0.01544	-0.016105	0.467819	0.482633	-0.002016	0.007085	0.000342	0.000176	8.5e-05	-0.000491	0.000426	-0.001354	0.010815	0.000808
308	-0.016549	-0.015806	-0.0161775	0.470164	0.481656	-0.002196	0.007308	0.000338	0.000169	6.6e-05	-0.000464	0.00044	-0.001367	0.010979	0.000602
309	-0.016421	-0.016214	-0.0163175	0.472364	0.480697	-0.00235	0.007515	0.000329	0.000167	3.9e-05	-0.000434	0.000453	-0.001393	0.011115	0.000384
310	-0.016244	-0.016781	-0.0165125	0.47499	0.479244	-0.002481	0.007702	0.000319	0.00017	7e-06	-0.000403	0.000467	-0.001422	0.011284	0.000164
311	-0.016062	-0.017375	-0.0167185	0.477516	0.477714	-0.002559	0.007848	0.000308	0.000177	-2.8e-05	-0.000375	0.000482	-0.001459	0.01146	-4.5e-05
312	-0.015874	-0.017963	-0.0169185	0.479774	0.476313	-0.002589	0.007968	0.000297	0.000189	-6.8e-05	-0.000351	0.000495	-0.001492	0.011691	-0.000263
313	-0.015783	-0.018647	-0.017215	0.482131	0.474646	-0.002543	0.008025	0.000286	0.000203	-0.000111	-0.000331	0.000504	-0.001523	0.01189	-0.000452
314	-0.015708	-0.019311	-0.0175095	0.483585	0.473698	-0.002468	0.008017	0.00028	0.00022	-0.000148	-0.000314	0.000505	-0.001535	0.012047	-0.000581
315	-0.015614	-0.019911	-0.0177625	0.484332	0.473287	-0.002371	0.00794	0.000277	0.000238	-0.000175	-0.0003	0.000499	-0.001531	0.012122	-0.000657
316	-0.0155	-0.020351	-0.0179255	0.483213	0.474481	-0.00224	0.007791	0.000276	0.000257	-0.000191	-0.000289	0.000482	-0.001517	0.01207	-0.000716
317	-0.015392	-0.02066	-0.018026	0.48154	0.476196	-0.00222	0.007646	0.00028	0.000281	-0.000191	-0.00028	0.000465	-0.001484	0.012018	-0.00072
318	-0.015422	-0.020994	-0.018208	0.480508	0.476836	-0.00208	0.007417	0.000275	0.000293	-0.000173	-0.000277	0.000443	-0.001461	0.011836	-0.000744
319	-0.015515	-0.021133	-0.018324	0.47904	0.477987	-0.002047	0.00722	0.000276	0.000304	-0.000142	-0.000276	0.000424	-0.00141	0.011728	-0.00075
320	-0.015737	-0.021213	-0.018475	0.478433	0.478176	-0.001928	0.007009	0.00027	0.000305	-0.000101	-0.000275	0.000403	-0.001369	0.011483	-0.000778
321	-0.016007	-0.021051	-0.018529	0.477102	0.479163	-0.001906	0.006871	0.00027	0.000307	-5.8e-05	-0.000269	0.000381	-0.001318	0.011221	-0.000781
322	-0.01635	-0.02084	-0.018595	0.476452	0.479567	-0.001884	0.00677	0.000276	0.000302	-1.3e-05	-0.00026	0.000361	-0.001271	0.01091	-0.000775
323	-0.016543	-0.020425	-0.018484	0.474328	0.481508	-0.001921	0.006743	0.000287	0.000298	2.9e-05	-0.000247	0.000339	-0.001228	0.010535	-0.000772
324	-0.016958	-0.01994	-0.018449	0.474014	0.481939	-0.001984	0.006788	0.000305	0.000285	6.8e-05	-0.000228	0.000318	-0.001187	0.010162	-0.000754
325	-0.017327	-0.019481	-0.018404	0.474528	0.481779	-0.002052	0.006888	0.000324	0.000267	0.000102	-0.000207	0.000298	-0.001155	0.009794	-0.000727
326	-0.01775	-0.019094	-0.018422	0.475684	0.481161	-0.002107	0.007024	0.000345	0.000243	0.000133	-0.000184	0.000277	-0.001139	0.00934	-0.000695
327	-0.018089	-0.018691	-0.01839	0.476944	0.480538	-0.00221	0.00721	0.000363	0.000222	0.000156	-0.000161	0.000257	-0.001135	0.0089	-0.000649
328	-0.018438	-0.018361	-0.0183995	0.478323	0.479741	-0.002331	0.007427	0.000376	0.000202	0.000174	-0.000138	0.00024	-0.001149	0.008491	-0.000616
329	-0.01875	-0.018095	-0.0184225	0.480143	0.478441	-0.002433	0.007644	0.00038	0.000184	0.000185	-0.000119	0.000227	-0.001177	0.008117	-0.000602
330	-0.019045	-0.017892	-0.0184685	0.482293	0.476749	-0.002522	0.007846	0.000374	0.000171	0.000188	-0.000105	0.000219	-0.001227	0.007829	-0.000614
331	-0.019233	-0.01774	-0.0184865	0.483877	0.475308	-0.002619	0.008024	0.000358	0.000166	0.000177	-9.3e-05	0.000217	-0.001293	0.0076	-0.00062
332	-0.019395	-0.017703	-0.018549	0.48568	0.473411	-0.002681	0.008157	0.000333	0.000166	0.000156	-8.6e-05	0.000222	-0.001371	0.00745	-0.000638
333	-0.019472	-0.017794	-0.018633	0.486996	0.471783	-0.002719	0.008249	0.000302	0.000173	0.000123	-8.3e-05	0.000231	-0.00145	0.00737	-0.000662
334	-0.019472	-0.018031	-0.0187515	0.48926	0.469091	-0.002643	0.008261	0.000265	0.000177	8.5e-05	-8.7e-05	0.000244	-0.001511	0.00737	-0.000696
335	-0.019332	-0.018209	-0.0187705	0.489918	0.467968	-0.002621	0.008295	0.000231	0.000192	3.8e-05	-9.4e-05	0.00026	-0.001542	0.007494	-0.000705
336	-0.019123	-0.018484	-0.0188035	0.490571	0.466787	-0.002532	0.008272	0.000194	0.000204	-8e-06	-0.000109	0.000277	-0.001555	0.00769	-0.000722
337	-0.018901	-0.018716	-0.0188085	0.490407	0.466439	-0.002427	0.008229	0.000163	0.000215	-5e-05	-0.000131	0.000297	-0.001544	0.007967	-0.000733
338	-0.01869	-0.018953	-0.0188215	0.489562	0.4667	-0.002324	0.008169	0.000138	0.000226	-8.5e-05	-0.000158	0.000319	-0.001508	0.008267	-0.000736
339	-0.01847	-0.01913	-0.0188	0.488017	0.467629	-0.002218	0.008091	0.000116	0.000237	-0.00011	-0.000192	0.00034	-0.001461	0.008639	-0.000759
340	-0.018299	-0.019331	-0.018815	0.486194	0.468788	-0.002094	0.007994	9.9e-05	0.000243	-0.000118	-0.000232	0.000363	-0.00142	0.009052	-0.000782
341	-0.018257	-0.019483	-0.01887	0.484233	0.469905	-0.001946	0.007875	8.3e-05	0.000246	-0.000109	-0.000274	0.000385	-0.001402	0.009492	-0.000808
342	-0.018204	-0.019612	-0.018908	0.482644	0.470702	-0.001829	0.00777	7.3e-05	0.000243	-8.2e-05	-0.000316	0.000408	-0.001408	0.009963	-0.000794
343	-0.018252	-0.019588	-0.01892	0.480525	0.471843	-0.001729	0.007658	6.7e-05	0.000237	-4.3e-05	-0.000356	0.00043	-0.001426	0.010395	-0.000776
344	-0.018363	-0.019582	-0.0189725	0.479088	0.472156	-0.001576	0.007514	6e-05	0.000221	7e-06	-0.000392	0.000449	-0.001452	0.010608	-0.000754
345	-0.018307	-0.019331	-0.018819	0.476854	0.4734	-0.001543	0.007426	6.3e-05	0.000207	5.6e-05	-0.000416	0.00046	-0.001472	0.010708	-0.000694
346	-0.018319	-0.018965	-0.018642	0.475486	0.473915	-0.001539	0.007354	7e-05	0.000189	0.000105	-0.00043	0.000466	-0.001486	0.010728	-0.000615
347	-0.018047	-0.018476	-0.0182615	0.473709	0.475089	-0.00156	0.007285	7.4e-05	0.00017	0.000147	-0.000431	0.000463	-0.001494	0.01061	-0.000511
348	-0.017595	-0.017916	-0.0177555	0.472011	0.476329	-0.001602	0.007207	7.5e-05	0.00015	0.000182	-0.000423	0.000454	-0.001503	0.010374	-0.000373
349	-0.017006	-0.017259	-0.0171325	0.470473	0.477764	-0.001688	0.007141	7.4e-05	0.000129	0.000209	-0.000406	0.00044	-0.001517	0.010026	-0.000186
350	-0.016355	-0.016655	-0.016505	0.469356	0.479152	-0.001792	0.007074	7e-05	0.000111	0.000228	-0.000381	0.000423	-0.001534	0.009596	2.6e-05
351	-0.015627	-0.015946	-0.0157865	0.46848	0.480654	-0.001953	0.007035	6.4e-05	9.5e-05	0.00024	-0.000356	0.000408	-0.001551	0.009173	0.00026
352	-0.014758	-0.015288	-0.015023	0.468006	0.481974	-0.002074	0.00697	4.8e-05	8e-05	0.000249	-0.000331	0.000393	-0.001579	0.008673	0.000494
353	-0.013894	-0.014647	-0.0142705	0.467586	0.483384	-0.002212	0.006925	3.2e-05	6.9e-05	0.000253	-0.000308	0.000381	-0.001599	0.0082	0.000721
354	-0.013113	-0.014131	-0.013622	0.467686	0.484227	-0.002273	0.006844	8e-06	5.9e-05	0.000255	-0.00029	0.000372	-0.001613	0.007706	0.000903
355	-0.012475	-0.013697	-0.013086	0.468288	0.484523	-0.0023	0.00675	-1.9e-05	5e-05	0.000256	-0.000276	0.000367	-0.001615	0.007209	0.001062
356	-0.011994	-0.013235	-0.0126145	0.468508	0.485128	-0.002346	0.006683	-4.4e-05	4.3e-05	0.000256	-0.000267	0.000365	-0.001589	0.006815	0.00118
357	-0.011712	-0.013012	-0.012362	0.4696	0.484571	-0.002277	0.006559	-7.1e-05	3.1e-05	0.00026	-0.000263	0.000364	-0.001558	0.006433	0.001247
358	-0.011624	-0.012884	-0.012254	0.471019	0.483519	-0.002193	0.006424	-9.4e-05	1.8e-05	0.000267	-0.000263	0.000364	-0.001523	0.006168	0.001285
359	-0.011647	-0.012857	-0.012252	0.472519	0.48231	-0.002063	0.006268	-0.000118	4e-06	0.000279	-0.000267	0.000365	-0.001491	0.006008	0.001276
360	-0.011849	-0.012896	-0.0123725	0.474172	0.480903	-0.001922	0.006113	-0.000138	-1e-05	0.000295	-0.000274	0.000367	-0.001462	0.005976	0.001234
361	-0.012124	-0.012806	-0.012465	0.474956	0.480447	-0.001815	0.005994	-0.000152	-1.9e-05	0.000311	-0.000281	0.000372	-0.001439	0.006071	0.001153
362	-0.012597	-0.01291	-0.0127535	0.476412	0.479246	-0.001637	0.005822	-0.000167	-3.2e-05	0.00033	-0.000292	0.000379	-0.001432	0.006216	0.001022
363	-0.01316	-0.013172	-0.013166	0.47795	0.477827	-0.001411	0.005613	-0.000184	-4.6e-05	0.00035	-0.000304	0.000385	-0.001436	0.006402	0.00084
364	-0.013821	-0.013481	-0.013651	0.479343	0.476611	-0.001241	0.005433	-0.000194	-5.8e-05	0.000372	-0.000321	0.0004	-0.001441	0.006713	0.000659
365	-0.014533	-0.013842	-0.0141875	0.480696	0.475521	-0.001094	0.00526	-0.000202	-6.9e-05	0.000392	-0.000337	0.000414	-0.001447	0.007045	0.000494
366	-0.015216	-0.014273	-0.0147445	0.482002	0.474532	-0.000967	0.005099	-0.000207	-7.9e-05	0.000407	-0.000352	0.000428	-0.001449	0.00739	0.000354
367	-0.015877	-0.014779	-0.015328	0.483156	0.473701	-0.00087	0.004962	-0.000211	-8.7e-05	0.000416	-0.000366	0.000441	-0.001438	0.007733	0.000248
368	-0.016488	-0.015308	-0.015898	0.483848	0.473217	-0.000811	0.00486	-0.000213	-9.1e-05	0.000415	-0.000376	0.00045	-0.001411	0.008064	0.000175
369	-0.017054	-0.015799	-0.0164265	0.484305	0.472757	-0.000753	0.004781	-0.000217	-9.3e-05	0.000404	-0.000381	0.000452	-0.00138	0.008273	0.00012
370	-0.017558	-0.016181	-0.0168695	0.484133	0.472937	-0.000781	0.00478	-0.000216	-9e-05	0.000388	-0.000381	0.000451	-0.00134	0.008483	0.000103
371	-0.017929	-0.016454	-0.0171915	0.483414	0.47359	-0.000842	0.004824	-0.000214	-8.4e-05	0.00037	-0.000375	0.000444	-0.001306	0.008575	0.000109
372	-0.018238	-0.016663	-0.0174505	0.483151	0.473588	-0.000884	0.004878	-0.000217	-8.1e-05	0.000356	-0.000369	0.000435	-0.001285	0.008568	0.000124
373	-0.01837	-0.016604	-0.017487	0.481285	0.475167	-0.001014	0.00501	-0.000215	-7.1e-05	0.00034	-0.000357	0.000418	-0.001268	0.008506	0.000163
374	-0.01843	-0.016527	-0.0174785	0.479754	0.476404	-0.001152	0.00518	-0.000213	-6.1e-05	0.000326	-0.000344	0.000397	-0.001262	0.008366	0.000226
375	-0.018386	-0.01638	-0.017383	0.478083	0.477773	-0.001295	0.005364	-0.00021	-5.1e-05	0.000315	-0.000333	0.000376	-0.00126	0.008166	0.0003
376	-0.018289	-0.016256	-0.0172725	0.476715	0.478882	-0.001426	0.005553	-0.000204	-4.2e-05	0.000305	-0.000322	0.000355	-0.001263	0.0079	0.000395
377	-0.018106	-0.016103	-0.0171045	0.476028	0.479391	-0.001513	0.005713	-0.000201	-3.7e-05	0.000298	-0.000314	0.000336	-0.001269	0.007582	0.000493
378	-0.017872	-0.016028	-0.01695	0.476134	0.479227	-0.001563	0.005842	-0.000198	-3.7e-05	0.000292	-0.00031	0.000322	-0.001271	0.007243	0.0006
379	-0.017567	-0.015958	-0.0167625	0.47624	0.479188	-0.001577	0.005945	-0.000197	-3.9e-05	0.000284	-0.000305	0.000309	-0.001269	0.00685	0.000675
380	-0.017288	-0.016005	-0.0166465	0.47698	0.478613	-0.001532	0.005999	-0.000197	-4.2e-05	0.000277	-0.0003	0.0003	-0.001264	0.006497	0.000714
381	-0.017067	-0.016129	-0.016598	0.478131	0.477743	-0.001452	0.006006	-0.000197	-4.8e-05	0.000273	-0.000295	0.000295	-0.001255	0.006242	0.00072
382	-0.016851	-0.016353	-0.016602	0.479567	0.476673	-0.001337	0.00597	-0.000196	-5.5e-05	0.000275	-0.000287	0.000291	-0.001251	0.00605	0.000691
383	-0.016655	-0.016688	-0.0166715	0.481248	0.475426	-0.001228	0.005899	-0.000191	-6.5e-05	0.000289	-0.000278	0.000291	-0.001249	0.005966	0.000661
384	-0.016587	-0.017085	-0.016836	0.483244	0.473685	-0.001023	0.005739	-0.00019	-8.2e-05	0.000313	-0.000266	0.00029	-0.001261	0.005884	0.000582
385	-0.016536	-0.017531	-0.0170335	0.48497	0.472212	-0.000799	0.005497	-0.000186	-0.000103	0.00035	-0.000254	0.00029	-0.001279	0.005868	0.000494
386	-0.016615	-0.01804	-0.0173275	0.486973	0.470416	-0.000533	0.00516	-0.000183	-0.000133	0.000403	-0.000243	0.000292	-0.001306	0.005857	0.000422
387	-0.016768	-0.018563	-0.0176655	0.488923	0.468703	-0.000238	0.004758	-0.00018	-0.000166	0.000465	-0.000234	0.000295	-0.001333	0.00584	0.000378
388	-0.017001	-0.019081	-0.018041	0.491167	0.466582	0.000112	0.004282	-0.000182	-0.000202	0.000533	-0.000229	0.000299	-0.001364	0.005744	0.000374
389	-0.017205	-0.019381	-0.018293	0.491668	0.466146	0.000444	0.003819	-0.000189	-0.000234	0.000591	-0.000224	0.000301	-0.00139	0.005588	0.000419
390	-0.01748	-0.019657	-0.0185685	0.492653	0.465243	0.000735	0.003419	-0.000199	-0.000263	0.000635	-0.000223	0.000304	-0.001415	0.005412	0.000519
391	-0.017714	-0.019831	-0.0187725	0.493646	0.46427	0.000953	0.003144	-0.000214	-0.000286	0.000663	-0.000223	0.000306	-0.001441	0.005234	0.000634
392	-0.017872	-0.019854	-0.018863	0.494539	0.463334	0.001101	0.003031	-0.000236	-0.000303	0.000674	-0.000223	0.000305	-0.001468	0.005037	0.000731
393	-0.017897	-0.019712	-0.0188045	0.494261	0.463334	0.001173	0.003098	-0.000264	-0.000312	0.000669	-0.000223	0.000297	-0.001491	0.004819	0.000766
394	-0.017996	-0.019356	-0.018676	0.494363	0.462879	0.001145	0.003365	-0.000295	-0.000317	0.000656	-0.000224	0.000286	-0.001519	0.004609	0.000759
395	-0.018036	-0.018821	-0.0184285	0.494037	0.462687	0.001026	0.003771	-0.000329	-0.000318	0.000639	-0.000225	0.000274	-0.001545	0.004434	0.000716
396	-0.017988	-0.018037	-0.0180125	0.492599	0.46328	0.000848	0.004258	-0.000364	-0.00032	0.000621	-0.000227	0.000259	-0.001584	0.004243	0.000668
397	-0.017809	-0.017106	-0.0174575	0.490318	0.46463	0.00058	0.004775	-0.000394	-0.000321	0.000607	-0.000229	0.000246	-0.001613	0.004024	0.000639
398	-0.017701	-0.016063	-0.016882	0.487838	0.466025	0.000294	0.005222	-0.000424	-0.000323	0.000599	-0.000233	0.000235	-0.001632	0.003722	0.000656
399	-0.017417	-0.014911	-0.016164	0.483038	0.469611	-6.3e-05	0.005602	-0.000445	-0.000324	0.000594	-0.000234	0.000225	-0.001628	0.00337	0.00075
400	-0.017128	-0.013763	-0.0154455	0.47867	0.472882	-0.000417	0.005855	-0.00046	-0.000328	0.000596	-0.000237	0.00022	-0.001606	0.003016	0.000893
401	-0.016795	-0.012742	-0.0147685	0.475034	0.475266	-0.000589	0.005907	-0.000479	-0.000335	0.000607	-0.000241	0.000217	-0.001586	0.002615	0.001025
402	-0.016359	-0.011811	-0.014085	0.471486	0.47773	-0.000758	0.005871	-0.000486	-0.000342	0.000621	-0.000244	0.000217	-0.001564	0.002275	0.001211
403	-0.01587	-0.011065	-0.0134675	0.468497	0.479659	-0.00085	0.005742	-0.000489	-0.00035	0.00064	-0.000246	0.000218	-0.001542	0.001979	0.001411
404	-0.01538	-0.01057	-0.012975	0.466754	0.480408	-0.000837	0.005497	-0.000483	-0.000363	0.000668	-0.000248	0.000221	-0.001523	0.001731	0.00161
405	-0.014871	-0.010336	-0.0126035	0.465924	0.480295	-0.00072	0.005145	-0.000468	-0.000385	0.000705	-0.000248	0.000223	-0.001513	0.001482	0.001817
406	-0.014329	-0.010299	-0.012314	0.465967	0.479437	-0.000532	0.004693	-0.00044	-0.000416	0.000758	-0.000248	0.000226	-0.001513	0.001225	0.002043
407	-0.01377	-0.010511	-0.0121405	0.466782	0.477938	-0.000281	0.004132	-0.000394	-0.000458	0.000828	-0.000249	0.000231	-0.001513	0.000949	0.002297
408	-0.013306	-0.010906	-0.012106	0.467733	0.476333	4.8e-05	0.003423	-0.000341	-0.000508	0.000915	-0.00025	0.000238	-0.001516	0.000628	0.002551
409	-0.012972	-0.011458	-0.012215	0.469331	0.474141	0.000464	0.002541	-0.000289	-0.000562	0.001023	-0.000253	0.000246	-0.001516	0.000235	0.002809
410	-0.012732	-0.01208	-0.012406	0.4698	0.473105	0.000903	0.001549	-0.000247	-0.000608	0.001137	-0.000255	0.000256	-0.001511	-0.000209	0.003092
411	-0.012609	-0.012698	-0.0126535	0.469466	0.472931	0.001367	0.000516	-0.000224	-0.000639	0.001242	-0.000257	0.000268	-0.0015	-0.000645	0.00337
412	-0.012645	-0.013425	-0.013035	0.469207	0.472703	0.001863	-0.00049	-0.000225	-0.000652	0.001336	-0.000259	0.000277	-0.001482	-0.001094	0.00359
413	-0.012774	-0.014266	-0.01352	0.46914	0.472251	0.002341	-0.001351	-0.000242	-0.000644	0.001409	-0.000262	0.000286	-0.001452	-0.001474	0.003704
414	-0.012961	-0.015031	-0.013996	0.469026	0.472066	0.002691	-0.001892	-0.000261	-0.000624	0.001452	-0.00026	0.000289	-0.001416	-0.001717	0.003668
415	-0.013202	-0.015714	-0.014458	0.468989	0.471896	0.002869	-0.002044	-0.000282	-0.000595	0.001465	-0.000253	0.000284	-0.001375	-0.001823	0.003466
416	-0.013426	-0.016357	-0.0148915	0.469168	0.471579	0.002864	-0.001809	-0.000306	-0.000565	0.001457	-0.000242	0.000273	-0.001329	-0.001801	0.003118
417	-0.013561	-0.016875	-0.015218	0.46917	0.471413	0.002683	-0.001208	-0.000334	-0.000538	0.001435	-0.000227	0.000254	-0.001284	-0.001661	0.002645
418	-0.013689	-0.017323	-0.015506	0.469623	0.470879	0.002359	-0.00033	-0.000369	-0.000514	0.001398	-0.00021	0.000231	-0.001242	-0.001473	0.002119
419	-0.013721	-0.017628	-0.0156745	0.470207	0.470284	0.001924	0.000737	-0.000411	-0.000495	0.001349	-0.000192	0.000206	-0.001204	-0.00124	0.001617
420	-0.013734	-0.017751	-0.0157425	0.470565	0.469918	0.001424	0.001872	-0.00046	-0.000482	0.001292	-0.000173	0.000181	-0.001175	-0.001024	0.00122
421	-0.013696	-0.017724	-0.01571	0.470409	0.469881	0.000952	0.002885	-0.000511	-0.000475	0.00123	-0.000158	0.000156	-0.001157	-0.000873	0.000964
422	-0.013574	-0.017527	-0.0155505	0.469893	0.470237	0.000544	0.003666	-0.000556	-0.000474	0.001161	-0.000147	0.000136	-0.001141	-0.000831	0.00086
423	-0.013368	-0.017077	-0.0152225	0.468667	0.471372	0.000173	0.004239	-0.000593	-0.000476	0.001086	-0.000137	0.000118	-0.001131	-0.000878	0.000921
424	-0.01303	-0.016566	-0.014798	0.46772	0.472203	-3.7e-05	0.004524	-0.000621	-0.000487	0.001013	-0.00013	0.000101	-0.001124	-0.001045	0.001082
425	-0.012762	-0.01593	-0.014346	0.466838	0.472953	-0.000182	0.004626	-0.000631	-0.000501	0.000938	-0.000126	8.8e-05	-0.001125	-0.001269	0.001352
426	-0.012542	-0.015248	-0.013895	0.466231	0.473434	-0.000257	0.004567	-0.000619	-0.000521	0.000864	-0.000122	7.6e-05	-0.001133	-0.001536	0.001718
427	-0.012288	-0.014663	-0.0134755	0.466435	0.472959	-0.00017	0.004329	-0.000599	-0.000543	0.000798	-0.000118	6.5e-05	-0.001147	-0.001844	0.002095
428	-0.012133	-0.014168	-0.0131505	0.467823	0.471295	4.5e-05	0.003942	-0.000568	-0.000568	0.000745	-0.000114	5.5e-05	-0.001168	-0.002192	0.002486
429	-0.012024	-0.013743	-0.0128835	0.469733	0.469234	0.000357	0.003446	-0.000529	-0.000595	0.000711	-0.00011	4.5e-05	-0.001194	-0.002545	0.002846
430	-0.011986	-0.013497	-0.0127415	0.472379	0.466574	0.000798	0.002809	-0.000487	-0.000622	0.00071	-0.000106	3.9e-05	-0.001231	-0.002898	0.003153
431	-0.012029	-0.013319	-0.012674	0.47472	0.464399	0.001355	0.002014	-0.000446	-0.000643	0.000747	-0.000105	3.7e-05	-0.001273	-0.003246	0.003413
432	-0.012126	-0.013222	-0.012674	0.476898	0.462666	0.001999	0.00111	-0.000416	-0.000655	0.00081	-0.000109	3.9e-05	-0.001319	-0.003554	0.003619
433	-0.012333	-0.013173	-0.012753	0.479165	0.461273	0.0027	0.000176	-0.000401	-0.000654	0.000897	-0.000118	4.8e-05	-0.001358	-0.003764	0.003715
434	-0.012599	-0.01318	-0.0128895	0.481472	0.460151	0.003454	-0.000745	-0.000402	-0.00064	0.000995	-0.000131	6e-05	-0.001386	-0.003844	0.00366
435	-0.012967	-0.013215	-0.013091	0.48337	0.459705	0.004137	-0.001451	-0.000412	-0.000615	0.001079	-0.000144	6.9e-05	-0.001388	-0.003708	0.003403
436	-0.013381	-0.013355	-0.013368	0.485434	0.459289	0.004737	-0.001891	-0.000427	-0.000586	0.001145	-0.000155	7.7e-05	-0.001364	-0.003369	0.002921
437	-0.01383	-0.013537	-0.0136835	0.487608	0.458898	0.005155	-0.001989	-0.000443	-0.000555	0.001176	-0.000163	8.4e-05	-0.001326	-0.002805	0.002257
438	-0.014334	-0.013782	-0.014058	0.490043	0.458229	0.005367	-0.001762	-0.000459	-0.000527	0.001171	-0.000169	9e-05	-0.001279	-0.00207	0.001477
439	-0.014968	-0.014145	-0.0145565	0.493094	0.45671	0.00536	-0.001201	-0.000481	-0.000501	0.001127	-0.000175	9.6e-05	-0.001231	-0.001206	0.000642
440	-0.015667	-0.014364	-0.0150155	0.495712	0.455327	0.005121	-0.000314	-0.000506	-0.000479	0.001044	-0.000176	0.0001	-0.001192	-0.000258	-0.000192
441	-0.016228	-0.014776	-0.015502	0.499175	0.45273	0.004784	0.000693	-0.000547	-0.00046	0.000942	-0.000177	0.000108	-0.001153	0.000652	-0.001
442	-0.01664	-0.015105	-0.0158725	0.501749	0.450796	0.00434	0.001828	-0.000592	-0.000446	0.000824	-0.000174	0.000114	-0.001123	0.001514	-0.0017
443	-0.01702	-0.01547	-0.016245	0.504327	0.44853	0.003885	0.002943	-0.000645	-0.000436	0.00071	-0.000171	0.000121	-0.001089	0.002253	-0.002286
444	-0.01728	-0.015872	-0.016576	0.506062	0.446802	0.003453	0.003917	-0.000694	-0.000431	0.000614	-0.000169	0.000128	-0.001049	0.002795	-0.002721
445	-0.017321	-0.016302	-0.0168115	0.50678	0.446011	0.003067	0.004669	-0.00073	-0.000432	0.000543	-0.000166	0.000132	-0.001001	0.003132	-0.002994
446	-0.017202	-0.016748	-0.016975	0.506519	0.44602	0.00274	0.005213	-0.000753	-0.00044	0.000496	-0.000164	0.000136	-0.000945	0.00331	-0.003139
447	-0.016929	-0.017137	-0.017033	0.50523	0.446977	0.002492	0.00551	-0.000755	-0.000454	0.000471	-0.000164	0.000139	-0.000884	0.003345	-0.003182
448	-0.016518	-0.017528	-0.017023	0.503594	0.448244	0.002354	0.005577	-0.000738	-0.000476	0.000463	-0.000166	0.000144	-0.00082	0.003258	-0.003174
449	-0.015976	-0.01779	-0.016883	0.501019	0.450385	0.002288	0.005455	-0.000703	-0.000504	0.000466	-0.000168	0.000151	-0.00076	0.003078	-0.003093
450	-0.015273	-0.017966	-0.0166195	0.498011	0.452839	0.002338	0.005148	-0.000652	-0.000537	0.000481	-0.00017	0.000159	-0.000707	0.002839	-0.002976
451	-0.014485	-0.018059	-0.016272	0.494405	0.455822	0.002447	0.004684	-0.000586	-0.000573	0.000506	-0.000174	0.00017	-0.000663	0.002579	-0.002797
452	-0.013621	-0.018156	-0.0158885	0.490946	0.458419	0.00269	0.004075	-0.000521	-0.00061	0.000543	-0.00018	0.000184	-0.000634	0.002224	-0.002603
453	-0.012655	-0.01804	-0.0153475	0.486918	0.461601	0.002974	0.003406	-0.000454	-0.000646	0.000591	-0.000186	0.000196	-0.000623	0.001863	-0.002394
454	-0.011571	-0.01775	-0.0146605	0.482528	0.465231	0.003298	0.002683	-0.000395	-0.000673	0.000645	-0.000193	0.000207	-0.000623	0.001516	-0.002215
455	-0.010472	-0.017327	-0.0138995	0.478591	0.468555	0.003654	0.001968	-0.000349	-0.000691	0.000702	-0.000201	0.000215	-0.000638	0.00125	-0.002085
456	-0.009223	-0.016843	-0.013033	0.474504	0.472049	0.004045	0.001291	-0.000317	-0.000697	0.000758	-0.000208	0.000218	-0.000671	0.001095	-0.002059
457	-0.008037	-0.016298	-0.0121675	0.470809	0.475302	0.004428	0.000696	-0.000297	-0.000693	0.000809	-0.000215	0.000217	-0.000724	0.00107	-0.002072
458	-0.00694	-0.015618	-0.011279	0.466414	0.479351	0.004748	0.000338	-0.000284	-0.000677	0.000839	-0.000217	0.000209	-0.000802	0.001263	-0.002158
459	-0.006037	-0.015042	-0.0105395	0.463217	0.482447	0.00501	0.000124	-0.000282	-0.000652	0.000854	-0.000216	0.000196	-0.000893	0.00152	-0.002282
460	-0.005369	-0.014433	-0.009901	0.460446	0.4853	0.005132	8.2e-05	-0.000284	-0.000622	0.000849	-0.000214	0.000184	-0.001002	0.00187	-0.002384
461	-0.00497	-0.013887	-0.0094285	0.458479	0.487562	0.005093	0.000197	-0.000292	-0.000588	0.000827	-0.000211	0.000173	-0.001124	0.002228	-0.002409
462	-0.004869	-0.013356	-0.0091125	0.456729	0.489763	0.00489	0.000437	-0.000303	-0.000556	0.000794	-0.000205	0.000163	-0.001239	0.002494	-0.002358
463	-0.005037	-0.012901	-0.008969	0.455541	0.491417	0.004526	0.000781	-0.000319	-0.000528	0.000757	-0.000196	0.000155	-0.001344	0.002658	-0.002248
464	-0.005482	-0.012464	-0.008973	0.455149	0.492372	0.004052	0.001201	-0.000343	-0.000504	0.000711	-0.000182	0.000149	-0.001433	0.002784	-0.002112
465	-0.006152	-0.012062	-0.009107	0.455598	0.492519	0.003533	0.001656	-0.000372	-0.000481	0.00066	-0.000165	0.000144	-0.001501	0.002866	-0.001967
466	-0.006935	-0.011569	-0.009252	0.455725	0.492983	0.002985	0.002137	-0.000404	-0.000458	0.000602	-0.000145	0.000139	-0.001544	0.002897	-0.001814
467	-0.007878	-0.011128	-0.009503	0.45721	0.492056	0.002483	0.002558	-0.00044	-0.000438	0.000552	-0.000127	0.000138	-0.001562	0.0029	-0.001707
468	-0.008891	-0.01081	-0.0098505	0.459132	0.490549	0.002036	0.002914	-0.000477	-0.000423	0.000515	-0.000113	0.000138	-0.001558	0.002861	-0.001657
469	-0.009996	-0.010451	-0.0102235	0.461697	0.488555	0.001651	0.003204	-0.00051	-0.000413	0.000495	-0.000106	0.000144	-0.001547	0.002777	-0.001534
470	-0.011014	-0.010109	-0.0105615	0.464143	0.486606	0.001355	0.003371	-0.000537	-0.000411	0.000497	-0.00011	0.000156	-0.001522	0.002684	-0.00139
471	-0.012002	-0.009915	-0.0109585	0.467122	0.48413	0.001154	0.003405	-0.000555	-0.000415	0.000518	-0.000123	0.000173	-0.001469	0.002533	-0.001231
472	-0.013101	-0.009764	-0.0114325	0.470797	0.481019	0.001023	0.003302	-0.000562	-0.000427	0.000554	-0.000146	0.000194	-0.001379	0.002238	-0.001043
473	-0.014016	-0.009676	-0.011846	0.473308	0.478951	0.000933	0.003126	-0.000559	-0.000447	0.000591	-0.000172	0.000217	-0.001255	0.001821	-0.000825
474	-0.014788	-0.009783	-0.0122855	0.475722	0.476726	0.000921	0.00286	-0.000551	-0.000474	0.00063	-0.000201	0.000239	-0.001122	0.001335	-0.000545
475	-0.015456	-0.010062	-0.012759	0.478149	0.474436	0.000971	0.002535	-0.000537	-0.000506	0.000667	-0.00023	0.000258	-0.001016	0.000923	-0.000172
476	-0.016011	-0.010408	-0.0132095	0.480686	0.471919	0.001102	0.002161	-0.00052	-0.000542	0.000707	-0.000262	0.000277	-0.000924	0.000501	0.000212
477	-0.016418	-0.010598	-0.013508	0.482075	0.470604	0.001214	0.001833	-0.000496	-0.000577	0.000748	-0.000291	0.000289	-0.000849	0.000158	0.000593
478	-0.01655	-0.0108	-0.013675	0.482794	0.469803	0.001346	0.001561	-0.000471	-0.000613	0.000798	-0.000319	0.000296	-0.000801	-0.000176	0.000888
479	-0.016437	-0.010949	-0.013693	0.483021	0.469502	0.001476	0.001354	-0.000446	-0.000644	0.000861	-0.000344	0.000297	-0.000788	-0.000486	0.001096
480	-0.016096	-0.010974	-0.013535	0.482369	0.46998	0.001583	0.001208	-0.000426	-0.000668	0.000929	-0.000366	0.000293	-0.000808	-0.000796	0.001219
481	-0.015562	-0.010951	-0.0132565	0.481365	0.470866	0.001661	0.00113	-0.000407	-0.000687	0.001005	-0.00038	0.000284	-0.000859	-0.001081	0.001299
482	-0.014875	-0.010947	-0.012911	0.480065	0.472069	0.001691	0.001153	-0.000394	-0.000698	0.001081	-0.000389	0.000272	-0.000939	-0.001266	0.001328
483	-0.014069	-0.010931	-0.0125	0.478465	0.473722	0.001664	0.001242	-0.000387	-0.000694	0.001149	-0.000394	0.000257	-0.00105	-0.001246	0.001335
484	-0.013292	-0.010978	-0.012135	0.476652	0.475597	0.001562	0.001386	-0.000382	-0.000678	0.001205	-0.000389	0.000241	-0.001175	-0.001134	0.001361
485	-0.01263	-0.011192	-0.011911	0.475618	0.476575	0.001449	0.001512	-0.000384	-0.000653	0.001246	-0.000372	0.000222	-0.001295	-0.001171	0.001401
486	-0.011943	-0.011325	-0.011634	0.473078	0.479083	0.001238	0.0017	-0.000376	-0.000621	0.001254	-0.000339	0.000195	-0.001403	-0.001177	0.001479
487	-0.011372	-0.011526	-0.011449	0.470976	0.481096	0.000987	0.001847	-0.000366	-0.000585	0.001239	-0.000299	0.000163	-0.001483	-0.001215	0.001588
488	-0.01103	-0.011903	-0.0114665	0.469294	0.482725	0.000697	0.002003	-0.000354	-0.000545	0.001192	-0.000257	0.000132	-0.001564	-0.001066	0.001774
489	-0.01087	-0.012367	-0.0116185	0.468185	0.483832	0.000411	0.002129	-0.000341	-0.000509	0.001132	-0.000217	0.0001	-0.001634	-0.00087	0.001997
490	-0.011027	-0.01299	-0.0120085	0.468057	0.483876	0.000148	0.002258	-0.000327	-0.000479	0.001067	-0.000185	7.2e-05	-0.001693	-0.000704	0.002198
491	-0.011402	-0.01375	-0.012576	0.468551	0.483117	-8.9e-05	0.002355	-0.000314	-0.000451	0.001	-0.00016	4.9e-05	-0.001732	-0.00059	0.002357
492	-0.011994	-0.014485	-0.0132395	0.469313	0.481997	-0.000309	0.002481	-0.000299	-0.000427	0.000934	-0.000142	3.1e-05	-0.001753	-0.000534	0.002459
493	-0.012737	-0.015199	-0.013968	0.470785	0.480121	-0.000475	0.002602	-0.000288	-0.000406	0.000878	-0.00013	2e-05	-0.001758	-0.000549	0.002488
494	-0.013676	-0.015821	-0.0147485	0.472733	0.477767	-0.000591	0.002724	-0.000279	-0.00039	0.000835	-0.000124	1.7e-05	-0.001746	-0.000627	0.002448
495	-0.014804	-0.016313	-0.0155585	0.475456	0.474697	-0.000632	0.002825	-0.000274	-0.00038	0.000804	-0.000123	2e-05	-0.001724	-0.000761	0.002354
496	-0.015985	-0.016791	-0.016388	0.478145	0.471494	-0.000602	0.002919	-0.000275	-0.000373	0.000779	-0.000123	2.8e-05	-0.001673	-0.000984	0.002185
497	-0.017141	-0.01706	-0.0171005	0.479908	0.469559	-0.000621	0.00312	-0.000271	-0.000368	0.000758	-0.000122	3.6e-05	-0.001604	-0.001244	0.00203
498	-0.018385	-0.017328	-0.0178565	0.482636	0.46648	-0.00054	0.003297	-0.000277	-0.000365	0.000743	-0.000123	4.7e-05	-0.001514	-0.001511	0.0018
499	-0.019546	-0.017432	-0.018489	0.485133	0.463752	-0.000463	0.003513	-0.000286	-0.000361	0.000736	-0.000124	5.8e-05	-0.001421	-0.001724	0.001563
500	-0.020496	-0.017391	-0.0189435	0.486817	0.461927	-0.000412	0.003777	-0.000296	-0.000354	0.000734	-0.000126	6.8e-05	-0.001338	-0.001835	0.001303
501	-0.02127	-0.017297	-0.0192835	0.487988	0.460724	-0.000387	0.004064	-0.000309	-0.000344	0.000735	-0.000132	7.9e-05	-0.001268	-0.001806	0.001033
502	-0.0217	-0.017103	-0.0194015	0.488131	0.460556	-0.000379	0.00435	-0.000325	-0.000329	0.000741	-0.00014	9.4e-05	-0.001226	-0.001606	0.000762
503	-0.021822	-0.016661	-0.0192415	0.487171	0.461871	-0.000494	0.004692	-0.000336	-0.000306	0.000742	-0.000149	0.000109	-0.00121	-0.001233	0.000571
504	-0.021632	-0.016194	-0.018913	0.486535	0.462885	-0.000561	0.004957	-0.00035	-0.000281	0.000741	-0.000161	0.000128	-0.001205	-0.000817	0.000383
505	-0.021185	-0.015691	-0.018438	0.485515	0.464414	-0.000662	0.00518	-0.000363	-0.000254	0.000733	-0.000168	0.000145	-0.001206	-0.0004	0.000243
506	-0.020459	-0.015072	-0.0177655	0.483209	0.467368	-0.000852	0.005381	-0.00037	-0.000222	0.000716	-0.000171	0.000159	-0.001207	-2.5e-05	0.000168
507	-0.019558	-0.014461	-0.0170095	0.480903	0.470259	-0.001	0.005498	-0.000378	-0.000192	0.000693	-0.00017	0.000171	-0.00121	0.000296	0.000122
508	-0.01855	-0.013858	-0.016204	0.478304	0.473426	-0.00114	0.005553	-0.000385	-0.000167	0.000669	-0.000166	0.00018	-0.001211	0.00057	0.000127
509	-0.017374	-0.013015	-0.0151945	0.47438	0.478099	-0.001356	0.0056	-0.000386	-0.00014	0.000642	-0.000158	0.000185	-0.001213	0.000809	0.000186
510	-0.016189	-0.012328	-0.0142585	0.471418	0.481795	-0.00151	0.005578	-0.000387	-0.000123	0.00062	-0.000151	0.000188	-0.001218	0.001003	0.000243
511	-0.015126	-0.011741	-0.0134335	0.469626	0.484186	-0.001576	0.005471	-0.00039	-0.000117	0.000608	-0.000148	0.000193	-0.001226	0.001185	0.000268
512	-0.01397	-0.01106	-0.012515	0.467105	0.487385	-0.0017	0.005381	-0.000386	-0.000115	0.000595	-0.000146	0.000197	-0.001228	0.0014	0.000308
513	-0.012945	-0.010484	-0.0117145	0.465626	0.489395	-0.001766	0.005245	-0.000382	-0.000122	0.000584	-0.000147	0.0002	-0.001227	0.001589	0.000318
514	-0.012092	-0.009947	-0.0110195	0.464714	0.490682	-0.001792	0.005062	-0.000377	-0.000136	0.000575	-0.000148	0.000203	-0.001223	0.001716	0.000311
515	-0.011355	-0.009387	-0.010371	0.463882	0.49188	-0.001825	0.004886	-0.000368	-0.000154	0.000563	-0.000149	0.000203	-0.001219	0.001797	0.000322
516	-0.010797	-0.008898	-0.0098475	0.463566	0.492433	-0.00183	0.004686	-0.000357	-0.000177	0.000555	-0.000151	0.000202	-0.001213	0.001803	0.000324
517	-0.010441	-0.00847	-0.0094555	0.463923	0.492247	-0.001793	0.004474	-0.000346	-0.000204	0.000548	-0.000154	0.0002	-0.001205	0.001733	0.00031
518	-0.010218	-0.008075	-0.0091465	0.464538	0.491719	-0.001744	0.004287	-0.000332	-0.000232	0.000542	-0.000159	0.000197	-0.001198	0.001622	0.000296
519	-0.010067	-0.007873	-0.00897	0.465972	0.490151	-0.001605	0.004061	-0.000324	-0.000261	0.00054	-0.000166	0.000192	-0.001191	0.001406	0.000213
520	-0.009954	-0.007764	-0.008859	0.46782	0.488053	-0.001432	0.003879	-0.000319	-0.000287	0.000544	-0.000176	0.000188	-0.00119	0.001172	7.9e-05
521	-0.009903	-0.007698	-0.0088005	0.469852	0.485635	-0.001251	0.003756	-0.000314	-0.000309	0.00055	-0.000187	0.000187	-0.001196	0.000989	-9.6e-05
522	-0.009805	-0.007753	-0.008779	0.471658	0.483241	-0.001036	0.003669	-0.000313	-0.000327	0.000552	-0.000197	0.000185	-0.0012	0.000788	-0.000362
523	-0.009725	-0.007944	-0.0088345	0.474385	0.479825	-0.000781	0.003623	-0.000314	-0.000341	0.000554	-0.000206	0.000186	-0.001208	0.000639	-0.000689
524	-0.009541	-0.008126	-0.0088335	0.475877	0.477532	-0.000563	0.003659	-0.000312	-0.000351	0.000549	-0.000211	0.000185	-0.001223	0.000568	-0.00101
525	-0.0093	-0.008366	-0.008833	0.476663	0.475878	-0.000404	0.00376	-0.000308	-0.000355	0.000534	-0.000212	0.000183	-0.001245	0.000607	-0.001293
526	-0.009039	-0.008747	-0.008893	0.477527	0.474208	-0.000271	0.003868	-0.000304	-0.000354	0.000511	-0.000208	0.00018	-0.00127	0.0007	-0.001528
527	-0.008658	-0.00916	-0.008909	0.476869	0.474149	-0.000212	0.003986	-0.000295	-0.000347	0.000476	-0.000198	0.000174	-0.001301	0.000872	-0.001686
528	-0.008393	-0.009578	-0.0089855	0.476384	0.474097	-0.000213	0.004073	-0.000281	-0.000337	0.000438	-0.000186	0.000169	-0.001349	0.001112	-0.001694
529	-0.00815	-0.009976	-0.009063	0.475045	0.474915	-0.000269	0.004128	-0.000264	-0.000324	0.000399	-0.000173	0.000165	-0.001401	0.001372	-0.001585
530	-0.00795	-0.010292	-0.009121	0.473104	0.476372	-0.00037	0.004138	-0.000241	-0.000312	0.000363	-0.00016	0.000165	-0.001455	0.001632	-0.001368
531	-0.007805	-0.010629	-0.009217	0.470178	0.478737	-0.000508	0.004105	-0.000217	-0.000298	0.000333	-0.00015	0.00017	-0.001494	0.00188	-0.001108
532	-0.007709	-0.010949	-0.009329	0.466581	0.481725	-0.000685	0.004047	-0.00019	-0.000282	0.00031	-0.000144	0.000183	-0.001515	0.002161	-0.00083
533	-0.00777	-0.011329	-0.0095495	0.462761	0.484838	-0.000893	0.003998	-0.000163	-0.000266	0.000292	-0.000142	0.000201	-0.001503	0.002475	-0.000583
534	-0.007844	-0.011642	-0.009743	0.458021	0.488749	-0.001117	0.003946	-0.000138	-0.000247	0.000278	-0.000142	0.00022	-0.001453	0.002796	-0.000414
535	-0.007992	-0.011983	-0.0099875	0.453215	0.492476	-0.001332	0.003889	-0.000116	-0.000228	0.000271	-0.000145	0.000238	-0.001378	0.0031	-0.000302
536	-0.008368	-0.012445	-0.0104065	0.449146	0.495274	-0.001514	0.003801	-9.8e-05	-0.000211	0.00027	-0.000153	0.000254	-0.001274	0.003391	-0.000264
537	-0.008725	-0.012956	-0.0108405	0.444603	0.498439	-0.001699	0.003748	-8.4e-05	-0.000192	0.00027	-0.000162	0.000263	-0.001149	0.003694	-0.000292
538	-0.009282	-0.013676	-0.011479	0.441914	0.499616	-0.001818	0.003684	-7.9e-05	-0.000178	0.000275	-0.000175	0.000269	-0.001031	0.003986	-0.000358
539	-0.009999	-0.014502	-0.0122505	0.439932	0.499802	-0.001895	0.003626	-8.1e-05	-0.000165	0.000282	-0.000191	0.000272	-0.000926	0.004275	-0.000437
540	-0.01082	-0.015382	-0.013101	0.439125	0.498797	-0.001938	0.003586	-8.6e-05	-0.000155	0.000289	-0.000207	0.000273	-0.000838	0.004514	-0.000503
541	-0.011751	-0.016293	-0.014022	0.439609	0.496547	-0.001937	0.003588	-9.5e-05	-0.000147	0.000295	-0.000226	0.000273	-0.000766	0.004647	-0.000589
542	-0.012696	-0.017114	-0.014905	0.441333	0.49338	-0.001893	0.003607	-0.000107	-0.000142	0.000301	-0.000244	0.000273	-0.000716	0.004642	-0.000671
543	-0.013567	-0.017808	-0.0156875	0.444107	0.489547	-0.001827	0.003665	-0.000119	-0.00014	0.000303	-0.000258	0.000271	-0.000693	0.004496	-0.000734
544	-0.014364	-0.018283	-0.0163235	0.447984	0.485172	-0.001736	0.003776	-0.000132	-0.000139	0.000301	-0.000269	0.000268	-0.000691	0.004241	-0.000796
545	-0.015024	-0.018482	-0.016753	0.452761	0.480513	-0.001613	0.003933	-0.000148	-0.000141	0.000296	-0.000273	0.000262	-0.000705	0.003837	-0.000877
546	-0.01552	-0.018402	-0.016961	0.458424	0.475722	-0.001472	0.004147	-0.000162	-0.000145	0.000287	-0.00027	0.000251	-0.000737	0.003372	-0.000965
547	-0.015845	-0.018092	-0.0169685	0.464751	0.471002	-0.00132	0.004399	-0.000177	-0.00015	0.000276	-0.00026	0.000235	-0.000788	0.002887	-0.001044
548	-0.01592	-0.017603	-0.0167615	0.470608	0.467411	-0.001218	0.004694	-0.000186	-0.000153	0.000263	-0.000241	0.000215	-0.000867	0.002521	-0.00107
549	-0.01579	-0.017104	-0.016447	0.477194	0.463443	-0.001096	0.004957	-0.000196	-0.000157	0.00025	-0.000218	0.000193	-0.000964	0.002126	-0.00108
550	-0.015405	-0.016557	-0.015981	0.483609	0.459679	-0.000961	0.005165	-0.000208	-0.000161	0.000235	-0.00019	0.000171	-0.00106	0.001652	-0.001104
551	-0.014745	-0.01589	-0.0153175	0.488266	0.457793	-0.00093	0.005363	-0.000208	-0.000159	0.000216	-0.000158	0.000145	-0.001164	0.001316	-0.00104
552	-0.013928	-0.015239	-0.0145835	0.492194	0.456428	-0.000938	0.00551	-0.000203	-0.000155	0.000199	-0.000128	0.000121	-0.001267	0.001166	-0.000927
553	-0.01302	-0.014701	-0.0138605	0.495251	0.455818	-0.000974	0.005585	-0.000192	-0.000148	0.000187	-0.000104	0.000104	-0.001398	0.00127	-0.000678
554	-0.012143	-0.014281	-0.013212	0.497222	0.455991	-0.001055	0.005624	-0.000175	-0.00014	0.000178	-8.6e-05	9.2e-05	-0.001535	0.001465	-0.000357
555	-0.011349	-0.014004	-0.0126765	0.498261	0.456737	-0.001158	0.005626	-0.000156	-0.00013	0.000169	-7.1e-05	8.5e-05	-0.001629	0.001585	-0.000105
556	-0.010675	-0.01378	-0.0122275	0.498577	0.457808	-0.001271	0.005604	-0.000137	-0.000119	0.00016	-6e-05	8.2e-05	-0.001687	0.001648	8.4e-05
557	-0.010079	-0.013597	-0.011838	0.497664	0.459824	-0.001439	0.005586	-0.000117	-0.000107	0.000156	-5.4e-05	8.6e-05	-0.001719	0.0017	0.000255
558	-0.009575	-0.013455	-0.011515	0.495835	0.462397	-0.001659	0.005575	-9.6e-05	-9.7e-05	0.000158	-5.3e-05	9.5e-05	-0.001729	0.001768	0.000411
559	-0.009205	-0.013448	-0.0113265	0.492927	0.465557	-0.001897	0.005575	-7.8e-05	-8.6e-05	0.000163	-5.8e-05	0.000107	-0.001697	0.00182	0.000495
560	-0.009024	-0.01357	-0.011297	0.489223	0.469137	-0.002148	0.005604	-6.1e-05	-7.6e-05	0.00017	-6.6e-05	0.000118	-0.001609	0.001851	0.000455
561	-0.009015	-0.013852	-0.0114335	0.485223	0.472639	-0.002382	0.005653	-4.7e-05	-6.8e-05	0.000179	-7.9e-05	0.00013	-0.001488	0.001892	0.000333
562	-0.009126	-0.01431	-0.011718	0.480702	0.476237	-0.002575	0.005701	-3.8e-05	-5.9e-05	0.000191	-9.6e-05	0.000143	-0.001379	0.002079	0.000231
563	-0.009478	-0.014916	-0.012197	0.476685	0.479137	-0.00275	0.005767	-2.8e-05	-5.2e-05	0.000203	-0.000117	0.000159	-0.001284	0.002488	0.000175
564	-0.009998	-0.01571	-0.012854	0.473516	0.480999	-0.002877	0.005837	-2e-05	-4.7e-05	0.000213	-0.00014	0.000175	-0.00117	0.002946	4e-05
565	-0.010687	-0.016586	-0.0136365	0.470481	0.482522	-0.002982	0.005916	-1.2e-05	-4.2e-05	0.000221	-0.000163	0.00019	-0.001059	0.003407	-0.000128
566	-0.011524	-0.017529	-0.0145265	0.468184	0.483161	-0.003032	0.005991	-4e-06	-4e-05	0.000226	-0.000183	0.000204	-0.000971	0.003797	-0.000297
567	-0.012443	-0.018505	-0.015474	0.466621	0.483135	-0.003037	0.006065	3e-06	-3.9e-05	0.000228	-0.000197	0.000214	-0.000905	0.004093	-0.000445
568	-0.013415	-0.019436	-0.0164255	0.465858	0.482408	-0.002974	0.006118	7e-06	-3.8e-05	0.000229	-0.000204	0.000221	-0.000862	0.004277	-0.000562
569	-0.014566	-0.020328	-0.017447	0.466768	0.480165	-0.002853	0.006157	1.2e-05	-3.9e-05	0.000232	-0.000206	0.000224	-0.000839	0.00435	-0.000627
570	-0.015613	-0.021092	-0.0183525	0.467342	0.478439	-0.002749	0.006216	1.7e-05	-3.6e-05	0.000229	-0.000198	0.000222	-0.000831	0.004294	-0.000636
571	-0.016563	-0.021757	-0.01916	0.468281	0.476619	-0.002627	0.006263	2.3e-05	-3e-05	0.000226	-0.000185	0.000216	-0.000842	0.004118	-0.000597
572	-0.01734	-0.022213	-0.0197765	0.469463	0.474907	-0.002502	0.006296	2.9e-05	-2.4e-05	0.000226	-0.00017	0.000209	-0.000876	0.003834	-0.000496
573	-0.017889	-0.022426	-0.0201575	0.470941	0.473355	-0.00237	0.006309	3.6e-05	-1.9e-05	0.000229	-0.000155	0.0002	-0.000931	0.003466	-0.000327
574	-0.018096	-0.022276	-0.020186	0.470992	0.473851	-0.002376	0.006372	5.3e-05	-8e-06	0.000227	-0.000137	0.000191	-0.001	0.003156	-7.5e-05
575	-0.01814	-0.022054	-0.020097	0.472357	0.47325	-0.002283	0.006354	6.1e-05	-1e-06	0.000225	-0.00012	0.000182	-0.001069	0.002733	0.000115
576	-0.017916	-0.021563	-0.0197395	0.47363	0.473124	-0.002218	0.006322	6.8e-05	6e-06	0.000217	-0.000102	0.000172	-0.001133	0.002295	0.000269
577	-0.017445	-0.020911	-0.019178	0.474544	0.473595	-0.002204	0.006291	7.5e-05	1.6e-05	0.000198	-8e-05	0.000161	-0.001194	0.002004	0.00041
578	-0.016734	-0.020103	-0.0184185	0.474982	0.474718	-0.002224	0.006255	8.2e-05	3.1e-05	0.000169	-5.7e-05	0.000148	-0.001249	0.001873	0.000543
579	-0.015877	-0.019266	-0.0175715	0.47488	0.4764	-0.00228	0.006226	8.6e-05	4.7e-05	0.000133	-3.3e-05	0.000136	-0.001299	0.001824	0.000653
580	-0.014908	-0.018308	-0.016608	0.47444	0.478547	-0.002355	0.006193	8.7e-05	6.5e-05	9.4e-05	-1.1e-05	0.000124	-0.001349	0.00184	0.00074
581	-0.01387	-0.017293	-0.0155815	0.473517	0.481083	-0.002441	0.006173	8.8e-05	8.3e-05	5.6e-05	6e-06	0.000116	-0.001403	0.001952	0.000792
582	-0.012865	-0.016276	-0.0145705	0.471923	0.484027	-0.002559	0.006177	9e-05	0.000102	2.3e-05	1.6e-05	0.000111	-0.00144	0.002115	0.000788
583	-0.012052	-0.015294	-0.013673	0.470231	0.486803	-0.002676	0.006201	9.3e-05	0.000121	-2e-06	2e-05	0.00011	-0.001465	0.002297	0.000724
584	-0.011275	-0.014351	-0.012813	0.467949	0.489831	-0.002802	0.006253	9.5e-05	0.00014	-2.1e-05	1.8e-05	0.000112	-0.001471	0.002485	0.000623
585	-0.010564	-0.013415	-0.0119895	0.46539	0.492813	-0.00291	0.006311	9.7e-05	0.000157	-3.3e-05	1.2e-05	0.000117	-0.001466	0.002659	0.000518
586	-0.009916	-0.012465	-0.0111905	0.462249	0.4962	-0.003069	0.006421	0.000103	0.000175	-3.6e-05	1e-06	0.000125	-0.001458	0.002865	0.000431
587	-0.009445	-0.011734	-0.0105895	0.460057	0.498233	-0.003162	0.006531	0.000106	0.000188	-3.4e-05	-1.1e-05	0.000134	-0.001444	0.003104	0.000319
588	-0.009143	-0.01112	-0.0101315	0.458126	0.499866	-0.003288	0.006689	0.000112	0.000199	-2.5e-05	-2.4e-05	0.000144	-0.001422	0.00337	0.000244
589	-0.009092	-0.010749	-0.0099205	0.457689	0.499691	-0.003292	0.006794	0.00011	0.0002	-1.2e-05	-3.4e-05	0.000151	-0.00139	0.003599	0.000158
590	-0.009171	-0.01047	-0.0098205	0.457129	0.49961	-0.003332	0.006931	0.000113	0.0002	4e-06	-4.3e-05	0.000157	-0.001342	0.003803	0.000105
591	-0.009418	-0.010391	-0.0099045	0.456862	0.499081	-0.003343	0.007061	0.000117	0.000193	2.2e-05	-5.1e-05	0.000162	-0.001282	0.00395	6.3e-05
592	-0.009804	-0.010461	-0.0101325	0.457081	0.498055	-0.003348	0.007179	0.000124	0.00018	4.1e-05	-5.6e-05	0.000166	-0.001214	0.004029	4.2e-05
593	-0.010389	-0.010721	-0.010555	0.457801	0.49655	-0.00332	0.007274	0.000133	0.000163	6e-05	-5.9e-05	0.000169	-0.001145	0.003993	6.1e-05
594	-0.01112	-0.011152	-0.011136	0.458682	0.495005	-0.003283	0.007353	0.000146	0.000144	7.7e-05	-5.9e-05	0.000171	-0.001072	0.003889	0.000106
595	-0.011995	-0.011782	-0.0118885	0.460061	0.493185	-0.003226	0.007405	0.000163	0.000122	9.2e-05	-6e-05	0.000173	-0.001002	0.00373	0.000178
596	-0.012893	-0.012513	-0.012703	0.46123	0.491875	-0.003193	0.007441	0.000181	0.000103	0.000104	-5.9e-05	0.000175	-0.00094	0.003555	0.000277
597	-0.01385	-0.013362	-0.013606	0.462451	0.490796	-0.003169	0.007451	0.000199	8.6e-05	0.000113	-5.8e-05	0.000176	-0.000882	0.003399	0.000388
598	-0.014722	-0.014253	-0.0144875	0.462567	0.491194	-0.00321	0.007475	0.000218	7.9e-05	0.000116	-5.5e-05	0.000176	-0.000823	0.00331	0.000504
599	-0.015578	-0.015074	-0.015326	0.462599	0.491847	-0.003225	0.007461	0.000231	7.7e-05	0.000113	-5e-05	0.000174	-0.000771	0.00324	0.000598
600	-0.016447	-0.015981	-0.016214	0.464142	0.491351	-0.003204	0.007413	0.000238	7.6e-05	0.000108	-4.4e-05	0.000172	-0.000728	0.003264	0.000671
601	-0.01721	-0.016873	-0.0170415	0.466485	0.490267	-0.003119	0.007311	0.000237	7.8e-05	9.8e-05	-3.7e-05	0.000167	-0.000692	0.003346	0.00069
602	-0.017823	-0.017508	-0.0176655	0.467931	0.490314	-0.003103	0.007237	0.000233	9e-05	8.1e-05	-2.8e-05	0.000162	-0.000659	0.003567	0.000676
603	-0.018324	-0.017988	-0.018156	0.469353	0.490543	-0.003098	0.007152	0.000228	0.000106	6.2e-05	-1.8e-05	0.000156	-0.000635	0.003883	0.000635
604	-0.018765	-0.018462	-0.0186135	0.472025	0.489619	-0.003084	0.007049	0.000218	0.000123	4.1e-05	-8e-06	0.00015	-0.000625	0.004247	0.000585
605	-0.019017	-0.01864	-0.0188285	0.472432	0.490934	-0.003152	0.006977	0.000212	0.000151	2.1e-05	0	0.000145	-0.000632	0.004582	0.000552
606	-0.019286	-0.018745	-0.0190155	0.473936	0.491019	-0.003163	0.006857	0.0002	0.000175	8e-06	5e-06	0.000139	-0.000661	0.004796	0.000526
607	-0.019618	-0.018834	-0.019226	0.476726	0.489629	-0.003123	0.0067	0.000185	0.000196	2e-06	7e-06	0.000133	-0.000703	0.00488	0.000528
608	-0.019781	-0.018797	-0.019289	0.47811	0.489386	-0.003125	0.006577	0.000172	0.00022	-1e-06	1e-05	0.000127	-0.000761	0.004843	0.00062
609	-0.019962	-0.018832	-0.019397	0.480602	0.487674	-0.003069	0.006414	0.000157	0.000237	4e-06	1.2e-05	0.00012	-0.000842	0.004662	0.00077
610	-0.020025	-0.018722	-0.0193735	0.481458	0.487265	-0.003052	0.006279	0.000146	0.000256	1.2e-05	1.7e-05	0.000115	-0.000946	0.004354	0.001015
611	-0.019999	-0.018599	-0.019299	0.482053	0.486805	-0.003038	0.00614	0.000135	0.000269	2.5e-05	2.3e-05	0.000111	-0.001067	0.0039	0.001313
612	-0.019869	-0.018484	-0.0191765	0.481962	0.486705	-0.003011	0.006003	0.000128	0.000277	4.2e-05	3e-05	0.000108	-0.001185	0.003318	0.001612
613	-0.019623	-0.018357	-0.01899	0.48063	0.487663	-0.003046	0.00595	0.000131	0.000281	5.8e-05	3.9e-05	0.000107	-0.001273	0.002702	0.001877
614	-0.019324	-0.018346	-0.018835	0.480018	0.487632	-0.003024	0.0059	0.000137	0.000275	7.3e-05	4.9e-05	0.000102	-0.001363	0.002147	0.002155
615	-0.01894	-0.01834	-0.01864	0.478893	0.487829	-0.002997	0.00587	0.00015	0.000265	8.8e-05	6.3e-05	9.4e-05	-0.001428	0.001654	0.002451
616	-0.018539	-0.018331	-0.018435	0.477841	0.487745	-0.00298	0.005877	0.000168	0.000252	9.8e-05	8.1e-05	8.4e-05	-0.001451	0.001135	0.00271
617	-0.018118	-0.018352	-0.018235	0.47624	0.488043	-0.002981	0.005928	0.000191	0.000238	0.000102	0.000101	7e-05	-0.001405	0.0006	0.00286
618	-0.017578	-0.018254	-0.017916	0.47348	0.489531	-0.00306	0.006051	0.000216	0.000231	0.000102	0.00012	5.8e-05	-0.001319	0.000185	0.002938
619	-0.017071	-0.018287	-0.017679	0.471978	0.489832	-0.003098	0.006164	0.000244	0.000219	0.000107	0.000131	5.1e-05	-0.00123	-2.7e-05	0.002967
620	-0.016536	-0.018372	-0.017454	0.470459	0.490228	-0.003159	0.006303	0.000269	0.000209	0.000109	0.000139	4.7e-05	-0.001139	-0.000106	0.002957
621	-0.016027	-0.018507	-0.017267	0.469489	0.490281	-0.003224	0.006462	0.000291	0.000202	0.000111	0.00014	5e-05	-0.001062	-2.6e-05	0.002872
622	-0.015567	-0.0187	-0.0171335	0.468746	0.490288	-0.003298	0.006657	0.000306	0.000197	0.000109	0.000132	6e-05	-0.000984	0.000173	0.002663
623	-0.015131	-0.018954	-0.0170425	0.46851	0.490061	-0.00341	0.0069	0.000312	0.000198	0.000101	0.000129	7.3e-05	-0.000882	0.000384	0.002353
624	-0.014763	-0.019235	-0.016999	0.468058	0.490292	-0.003539	0.007181	0.000313	0.000205	9e-05	0.000123	8.9e-05	-0.000788	0.000698	0.00202
625	-0.014482	-0.019677	-0.0170795	0.468228	0.490201	-0.003678	0.007477	0.000308	0.000216	7.9e-05	0.000112	0.00011	-0.000735	0.001314	0.001753
626	-0.014308	-0.020101	-0.0172045	0.468748	0.489973	-0.003777	0.007767	0.000298	0.000223	6.7e-05	9.4e-05	0.000131	-0.000686	0.002129	0.001399
627	-0.014217	-0.020588	-0.0174025	0.470274	0.489059	-0.00392	0.008091	0.000283	0.000238	5e-05	8e-05	0.000151	-0.000634	0.003006	0.000998
628	-0.014217	-0.021139	-0.017678	0.471976	0.488172	-0.004034	0.008372	0.000267	0.000252	3.2e-05	6.8e-05	0.000165	-0.000579	0.003833	0.000572
629	-0.014362	-0.021739	-0.0180505	0.47429	0.486929	-0.00413	0.008593	0.00025	0.000266	1.4e-05	6e-05	0.000173	-0.000531	0.004522	0.000189
630	-0.01474	-0.022429	-0.0185845	0.47827	0.484113	-0.004134	0.008685	0.000233	0.000273	-1e-06	5.3e-05	0.000175	-0.000497	0.005015	-0.000105
631	-0.015238	-0.023133	-0.0191855	0.482241	0.481244	-0.004081	0.00869	0.000217	0.00028	-1.5e-05	4.9e-05	0.000173	-0.000479	0.005347	-0.000316
632	-0.015723	-0.023656	-0.0196895	0.484657	0.47999	-0.004106	0.008692	0.000205	0.000297	-2.7e-05	4.9e-05	0.000171	-0.000483	0.005523	-0.000383
633	-0.016257	-0.024074	-0.0201655	0.486344	0.479329	-0.004103	0.008631	0.000195	0.000314	-3.4e-05	4.8e-05	0.000169	-0.000504	0.005503	-0.000335
634	-0.016946	-0.024504	-0.020725	0.489523	0.476881	-0.003941	0.008453	0.000185	0.000321	-3.2e-05	4.3e-05	0.000165	-0.000546	0.005283	-0.000211
635	-0.017555	-0.024835	-0.021195	0.491748	0.475258	-0.003819	0.008273	0.000177	0.000332	-2.6e-05	4.2e-05	0.000161	-0.000601	0.004931	4.7e-05
636	-0.018043	-0.024995	-0.021519	0.49299	0.474333	-0.003683	0.008082	0.000171	0.000345	-1.7e-05	4.2e-05	0.000157	-0.000662	0.004361	0.000398
637	-0.018509	-0.025061	-0.021785	0.493885	0.473409	-0.00352	0.007858	0.000167	0.000355	-5e-06	4.4e-05	0.000153	-0.000719	0.003593	0.0008
638	-0.019005	-0.025107	-0.022056	0.494411	0.47254	-0.003329	0.007622	0.000166	0.000358	7e-06	4.7e-05	0.000148	-0.000767	0.002711	0.001206
639	-0.019343	-0.025022	-0.0221825	0.493503	0.472856	-0.003211	0.007418	0.000167	0.000362	1.5e-05	5.3e-05	0.000142	-0.000798	0.001809	0.001602
640	-0.019626	-0.024822	-0.022224	0.491639	0.47376	-0.003149	0.007243	0.00017	0.000364	1.6e-05	6.3e-05	0.000135	-0.000804	0.00101	0.001921
641	-0.019935	-0.024628	-0.0222815	0.489985	0.474214	-0.003045	0.007056	0.000178	0.000358	1.6e-05	7.2e-05	0.000127	-0.000802	0.000383	0.002194
642	-0.020141	-0.024339	-0.02224	0.487656	0.475139	-0.002983	0.006901	0.000191	0.00035	1.1e-05	8.5e-05	0.000118	-0.000788	-5.2e-05	0.002391
643	-0.020157	-0.023874	-0.0220155	0.484101	0.477012	-0.002977	0.006786	0.000205	0.000342	2e-06	9.9e-05	0.00011	-0.000757	-0.000326	0.002481
644	-0.020037	-0.023404	-0.0217205	0.480346	0.479008	-0.003029	0.006724	0.00022	0.000338	-1.1e-05	0.000117	0.000104	-0.000726	-0.000473	0.002486
645	-0.019812	-0.022784	-0.021298	0.476193	0.481219	-0.003072	0.006686	0.000232	0.000331	-2.6e-05	0.000133	9.8e-05	-0.000695	-0.000545	0.00238
646	-0.019469	-0.022123	-0.020796	0.472163	0.48338	-0.00313	0.006691	0.000239	0.000326	-4e-05	0.000149	9.4e-05	-0.000671	-0.000509	0.002231
647	-0.019036	-0.021362	-0.020199	0.467994	0.485909	-0.003238	0.006758	0.000241	0.000326	-5.6e-05	0.000165	9.3e-05	-0.000658	-0.000377	0.002065
648	-0.018546	-0.020622	-0.019584	0.463945	0.488603	-0.003381	0.006873	0.000237	0.000328	-7.2e-05	0.000179	9.3e-05	-0.000659	-0.000146	0.001897
649	-0.018011	-0.019907	-0.018959	0.460485	0.491154	-0.003548	0.007031	0.000227	0.000332	-8.5e-05	0.000187	9.7e-05	-0.00069	0.000253	0.001719
650	-0.017492	-0.019237	-0.0183645	0.457666	0.493606	-0.003728	0.007212	0.000214	0.000337	-9.5e-05	0.000188	0.000105	-0.000743	0.000803	0.001519
651	-0.017041	-0.018729	-0.017885	0.456181	0.495249	-0.003914	0.007408	0.0002	0.000342	-0.000101	0.000184	0.000114	-0.00079	0.001418	0.001255
652	-0.016627	-0.018354	-0.0174905	0.455394	0.496588	-0.004094	0.007587	0.000185	0.000348	-0.000105	0.000176	0.000122	-0.000818	0.002021	0.000949
653	-0.016272	-0.018125	-0.0171985	0.455661	0.497299	-0.004237	0.007726	0.000171	0.000354	-0.000102	0.000166	0.00013	-0.000838	0.002563	0.000646
654	-0.015967	-0.018046	-0.0170065	0.456893	0.497326	-0.004296	0.007789	0.000159	0.000359	-9.4e-05	0.000154	0.000137	-0.000856	0.002982	0.000389
655	-0.015732	-0.018106	-0.016919	0.459088	0.496568	-0.004292	0.007793	0.000149	0.000363	-7.9e-05	0.000144	0.000143	-0.000871	0.003219	0.000214
656	-0.015602	-0.018286	-0.016944	0.462596	0.494547	-0.004154	0.007693	0.000144	0.000358	-6e-05	0.000134	0.000144	-0.000887	0.003244	0.000124
657	-0.015417	-0.018487	-0.016952	0.465619	0.493004	-0.004016	0.00759	0.000144	0.000361	-3.9e-05	0.000127	0.000148	-0.000901	0.003127	0.000134
658	-0.015263	-0.018777	-0.01702	0.470499	0.489442	-0.003736	0.007379	0.000148	0.000351	-1.3e-05	0.000118	0.000148	-0.000918	0.002881	0.000206
659	-0.014937	-0.018871	-0.016904	0.473689	0.487352	-0.003496	0.00719	0.000156	0.000346	1.3e-05	0.000111	0.000152	-0.000934	0.002583	0.00036
660	-0.014666	-0.01903	-0.016848	0.476986	0.484872	-0.003242	0.006986	0.000165	0.000335	3.7e-05	0.000106	0.000152	-0.000946	0.002206	0.000573
661	-0.014419	-0.019212	-0.0168155	0.479709	0.482691	-0.00303	0.006805	0.000178	0.000321	5.6e-05	0.000101	0.00015	-0.000952	0.001841	0.000798
662	-0.014232	-0.019421	-0.0168265	0.481858	0.480851	-0.002871	0.006661	0.000192	0.000308	7e-05	9.8e-05	0.000146	-0.000949	0.001525	0.00102
663	-0.014084	-0.019657	-0.0168705	0.483436	0.479318	-0.002762	0.006551	0.000206	0.00029	7.8e-05	9.8e-05	0.00014	-0.000939	0.001269	0.001242
664	-0.014043	-0.019896	-0.0169695	0.483809	0.478634	-0.002693	0.006473	0.00022	0.000273	8.2e-05	9.6e-05	0.000134	-0.000928	0.001083	0.001426
665	-0.014172	-0.020211	-0.0171915	0.484129	0.47782	-0.002643	0.006416	0.00023	0.000253	8.3e-05	9.2e-05	0.000127	-0.000918	0.00098	0.001561
666	-0.014422	-0.020538	-0.01748	0.484036	0.477283	-0.002634	0.006416	0.000234	0.000237	8.2e-05	8.6e-05	0.000122	-0.000914	0.001011	0.001625
667	-0.014749	-0.020729	-0.017739	0.483286	0.47743	-0.002743	0.006505	0.000234	0.000227	7.8e-05	8e-05	0.000123	-0.000918	0.001213	0.001653
668	-0.015241	-0.02096	-0.0181005	0.482396	0.477537	-0.002847	0.006611	0.000229	0.00022	7.5e-05	7.1e-05	0.000125	-0.000933	0.001537	0.001611
669	-0.015826	-0.021159	-0.0184925	0.481432	0.477657	-0.002979	0.006769	0.000218	0.000218	7.3e-05	6e-05	0.000129	-0.000961	0.001969	0.00152
670	-0.016397	-0.021302	-0.0188495	0.479651	0.478501	-0.003176	0.00699	0.000201	0.000223	6.9e-05	5.1e-05	0.000136	-0.000991	0.002509	0.001382
671	-0.016975	-0.021366	-0.0191705	0.478347	0.478789	-0.003367	0.007215	0.000179	0.000226	6.8e-05	4.2e-05	0.000142	-0.001024	0.003075	0.001191
672	-0.017548	-0.021336	-0.019442	0.476758	0.479451	-0.003596	0.007448	0.000156	0.000233	6.6e-05	3.3e-05	0.000149	-0.001047	0.003667	0.000961
673	-0.018069	-0.02115	-0.0196095	0.474168	0.481284	-0.003826	0.007667	0.000132	0.000242	6.2e-05	2.4e-05	0.000154	-0.001064	0.004191	0.000708
674	-0.018659	-0.02101	-0.0198345	0.47289	0.482038	-0.004062	0.007853	0.000107	0.000249	5.8e-05	1.8e-05	0.000161	-0.001072	0.004705	0.000485
675	-0.019219	-0.02076	-0.0199895	0.471566	0.482991	-0.004248	0.007984	8.4e-05	0.00025	5.2e-05	1.3e-05	0.000166	-0.001079	0.005124	0.00031
676	-0.019861	-0.020502	-0.0201815	0.472417	0.481992	-0.00431	0.007996	6.2e-05	0.000241	4.9e-05	8e-06	0.000171	-0.001089	0.005432	0.00021
677	-0.020395	-0.020088	-0.0202415	0.472449	0.481922	-0.004314	0.00798	4.4e-05	0.000232	4.1e-05	7e-06	0.000175	-0.001102	0.005644	0.000175
678	-0.020892	-0.019614	-0.020253	0.473132	0.481331	-0.004228	0.007907	2.9e-05	0.000218	3.5e-05	8e-06	0.000177	-0.001124	0.005719	0.000204
679	-0.02144	-0.019283	-0.0203615	0.476451	0.478321	-0.004006	0.00775	1.6e-05	0.000192	3.3e-05	9e-06	0.000176	-0.001162	0.005669	0.000293
680	-0.021737	-0.01871	-0.0202235	0.477928	0.477175	-0.003793	0.007625	7e-06	0.00017	3.1e-05	1.1e-05	0.000173	-0.001206	0.00549	0.000433
681	-0.021865	-0.018127	-0.019996	0.480247	0.475216	-0.003509	0.007472	0	0.000143	3.5e-05	1.3e-05	0.000168	-0.001243	0.005232	0.000586
682	-0.021836	-0.017483	-0.0196595	0.482592	0.473141	-0.003201	0.007324	-4e-06	0.000114	4.4e-05	1.1e-05	0.000161	-0.001269	0.004923	0.000731
683	-0.02166	-0.01683	-0.019245	0.484746	0.471264	-0.002929	0.007202	-6e-06	8.7e-05	5.6e-05	9e-06	0.000153	-0.001277	0.004589	0.00086
684	-0.021324	-0.016157	-0.0187405	0.486655	0.469584	-0.002674	0.007086	-8e-06	6e-05	7.1e-05	5e-06	0.000146	-0.001274	0.004228	0.000953
685	-0.020916	-0.015486	-0.018201	0.488444	0.468015	-0.002465	0.006993	-1e-05	3.4e-05	8.7e-05	2e-06	0.000139	-0.00126	0.003867	0.001023
686	-0.020502	-0.014885	-0.0176935	0.489881	0.466658	-0.002298	0.006907	-1.3e-05	1.1e-05	0.000101	-1e-06	0.000133	-0.001244	0.003529	0.001063
687	-0.019976	-0.014218	-0.017097	0.488668	0.467895	-0.002349	0.006917	-6e-06	2e-06	0.000109	-1e-06	0.000129	-0.001225	0.003251	0.001116
688	-0.019614	-0.013926	-0.01677	0.490003	0.466416	-0.002323	0.006859	-5e-06	-1.3e-05	0.000119	0	0.000126	-0.001219	0.002986	0.001156
689	-0.019186	-0.013605	-0.0163955	0.489569	0.46641	-0.002328	0.006804	-5e-06	-2.2e-05	0.000125	-1e-06	0.000123	-0.001223	0.002765	0.001156
690	-0.018726	-0.013326	-0.016026	0.488539	0.466856	-0.002398	0.006764	-4e-06	-2.7e-05	0.000132	-1e-06	0.000122	-0.001237	0.002605	0.001135
691	-0.018209	-0.013097	-0.015653	0.486847	0.467761	-0.002503	0.006732	-3e-06	-3e-05	0.000143	-4e-06	0.000124	-0.001262	0.002515	0.001078
692	-0.017628	-0.012952	-0.01529	0.48458	0.468989	-0.002622	0.006693	-2e-06	-3.1e-05	0.000159	-9e-06	0.000127	-0.001301	0.002506	0.00099
693	-0.016928	-0.012918	-0.014923	0.48171	0.470695	-0.002778	0.006661	0	-3.1e-05	0.000178	-1.4e-05	0.000133	-0.001352	0.002585	0.000889
694	-0.016212	-0.013057	-0.0146345	0.478223	0.472818	-0.002937	0.006625	3e-06	-2.8e-05	0.0002	-2.3e-05	0.000141	-0.001403	0.002786	0.000765
695	-0.01553	-0.013328	-0.014429	0.47441	0.475123	-0.003107	0.006605	8e-06	-2.6e-05	0.000225	-3.2e-05	0.000151	-0.001447	0.003097	0.000638
696	-0.014946	-0.013724	-0.014335	0.470568	0.477327	-0.003212	0.00657	1e-05	-2.6e-05	0.000247	-4.3e-05	0.000162	-0.001475	0.003438	0.000488
697	-0.014578	-0.014307	-0.0144425	0.467803	0.478096	-0.003153	0.006449	3e-06	-3.1e-05	0.000267	-5.6e-05	0.000171	-0.00148	0.003716	0.000279
698	-0.014329	-0.014975	-0.014652	0.464275	0.479785	-0.003148	0.006419	1e-06	-3.4e-05	0.000276	-6.5e-05	0.00018	-0.001457	0.004023	0.000142
699	-0.014176	-0.015599	-0.0148875	0.459769	0.482501	-0.003098	0.006417	-4e-06	-3.5e-05	0.000277	-7.2e-05	0.000186	-0.00142	0.004264	3.3e-05
700	-0.01428	-0.016361	-0.0153205	0.45737	0.483112	-0.002951	0.006375	-1.4e-05	-4.5e-05	0.00028	-7.8e-05	0.000192	-0.001382	0.004415	-2.2e-05
701	-0.014568	-0.017065	-0.0158165	0.455572	0.483349	-0.002771	0.006341	-2.9e-05	-5.8e-05	0.000284	-8.5e-05	0.000197	-0.001334	0.004494	-5.2e-05
702	-0.015007	-0.017667	-0.016337	0.45472	0.482941	-0.002555	0.006296	-4.8e-05	-7.5e-05	0.000291	-9.3e-05	0.000201	-0.00128	0.004482	-8.8e-05
703	-0.015555	-0.018219	-0.016887	0.454522	0.482104	-0.002337	0.006258	-7e-05	-9.4e-05	0.000303	-0.000103	0.000204	-0.001226	0.004416	-0.000126
704	-0.016249	-0.018703	-0.017476	0.45533	0.480567	-0.00212	0.006229	-9.5e-05	-0.000115	0.000317	-0.000115	0.000207	-0.001174	0.004315	-0.000184
705	-0.016993	-0.019089	-0.018041	0.456962	0.47854	-0.001923	0.006194	-0.000122	-0.000134	0.000333	-0.00013	0.00021	-0.001128	0.004186	-0.000268
706	-0.0177	-0.019363	-0.0185315	0.459623	0.475816	-0.00173	0.006143	-0.000154	-0.000152	0.000351	-0.000148	0.000214	-0.001097	0.004025	-0.000363
707	-0.018192	-0.019303	-0.0187475	0.46078	0.47517	-0.001667	0.006146	-0.000178	-0.000163	0.000363	-0.000165	0.000218	-0.001074	0.003926	-0.000432
708	-0.01868	-0.019243	-0.0189615	0.464047	0.472629	-0.001567	0.006071	-0.000207	-0.000175	0.000375	-0.000184	0.000221	-0.00106	0.003786	-0.000518
709	-0.018983	-0.019008	-0.0189955	0.466703	0.471086	-0.001545	0.005979	-0.000228	-0.000183	0.000383	-0.000199	0.000221	-0.001047	0.003662	-0.000585
710	-0.019184	-0.018685	-0.0189345	0.47056	0.468637	-0.001533	0.005833	-0.000245	-0.000193	0.000389	-0.000213	0.00022	-0.001046	0.003521	-0.000624
711	-0.019166	-0.018085	-0.0186255	0.473296	0.467653	-0.001546	0.005626	-0.000257	-0.000201	0.000392	-0.000224	0.000215	-0.001054	0.003353	-0.000664
712	-0.018946	-0.017375	-0.0181605	0.475316	0.467516	-0.001592	0.005377	-0.000264	-0.000209	0.000389	-0.000229	0.000206	-0.001068	0.003202	-0.000691
713	-0.018553	-0.016549	-0.017551	0.476403	0.468333	-0.00167	0.005115	-0.000265	-0.000216	0.000381	-0.000229	0.000194	-0.001094	0.003092	-0.00071
714	-0.018022	-0.015738	-0.01688	0.477163	0.469562	-0.001769	0.004845	-0.00026	-0.000225	0.00037	-0.000225	0.000181	-0.001131	0.003027	-0.000712
715	-0.017381	-0.014924	-0.0161525	0.477574	0.471095	-0.001858	0.004606	-0.000252	-0.000234	0.000358	-0.000217	0.000167	-0.001181	0.002978	-0.000722
716	-0.016545	-0.013928	-0.0152365	0.475438	0.475108	-0.001986	0.004481	-0.000239	-0.000239	0.000344	-0.000204	0.000151	-0.001238	0.00293	-0.000742
717	-0.015616	-0.013107	-0.0143615	0.474987	0.477186	-0.002054	0.00437	-0.00023	-0.000245	0.000337	-0.00019	0.000137	-0.0013	0.00284	-0.00079
718	-0.014624	-0.012329	-0.0134765	0.474398	0.479263	-0.002113	0.004353	-0.000221	-0.000247	0.000337	-0.000177	0.000125	-0.001364	0.00273	-0.00082
719	-0.013578	-0.011599	-0.0125885	0.473291	0.481549	-0.002141	0.004412	-0.000217	-0.000242	0.00034	-0.000163	0.000115	-0.001414	0.002604	-0.00089
720	-0.012552	-0.010895	-0.0117235	0.471754	0.483989	-0.00213	0.004543	-0.000223	-0.000231	0.000344	-0.000149	0.000106	-0.001454	0.002455	-0.000981
721	-0.0116	-0.010249	-0.0109245	0.470569	0.485865	-0.002071	0.004696	-0.000235	-0.000217	0.000351	-0.000135	9.8e-05	-0.001486	0.002292	-0.001068
722	-0.010759	-0.009707	-0.010233	0.470026	0.486881	-0.001955	0.004855	-0.000254	-0.000204	0.000358	-0.000123	9.1e-05	-0.001509	0.002128	-0.001169
723	-0.010019	-0.009233	-0.009626	0.469256	0.487928	-0.001838	0.005034	-0.000274	-0.000191	0.000366	-0.000114	8.5e-05	-0.001515	0.001965	-0.001266
724	-0.009461	-0.008844	-0.0091525	0.468934	0.488356	-0.001687	0.005209	-0.000297	-0.000182	0.000375	-0.000109	8.3e-05	-0.001506	0.001808	-0.001408
725	-0.009162	-0.008581	-0.0088715	0.46953	0.487784	-0.001495	0.005343	-0.00032	-0.000179	0.000392	-0.000109	8.3e-05	-0.001499	0.00172	-0.001561
726	-0.009042	-0.008493	-0.0087675	0.470208	0.486999	-0.001293	0.005454	-0.000341	-0.000182	0.000415	-0.000111	8.5e-05	-0.001482	0.001656	-0.001743
727	-0.009229	-0.008629	-0.008929	0.472904	0.484345	-0.001085	0.00551	-0.000357	-0.000191	0.000446	-0.000118	9.1e-05	-0.001462	0.001583	-0.001926
728	-0.009584	-0.008861	-0.0092225	0.474764	0.482367	-0.000859	0.005518	-0.000371	-0.0002	0.00048	-0.000125	9.6e-05	-0.001434	0.001492	-0.002153
729	-0.010153	-0.009365	-0.009759	0.476612	0.480397	-0.000653	0.005468	-0.00038	-0.000208	0.000514	-0.000132	0.0001	-0.001403	0.001365	-0.002344
730	-0.010862	-0.010013	-0.0104375	0.478588	0.478307	-0.000465	0.005337	-0.000385	-0.000216	0.000546	-0.000139	0.000104	-0.001367	0.001152	-0.00245
731	-0.011606	-0.010764	-0.011185	0.479924	0.476901	-0.000314	0.005102	-0.000383	-0.000223	0.000574	-0.000145	0.000107	-0.001318	0.000823	-0.002456
732	-0.012426	-0.011702	-0.012064	0.480898	0.475719	-0.000183	0.004752	-0.000373	-0.000229	0.000593	-0.000152	0.00011	-0.00125	0.000356	-0.002345
733	-0.013263	-0.012807	-0.013035	0.481455	0.474848	-7.3e-05	0.004286	-0.00036	-0.000236	0.000606	-0.00016	0.000114	-0.001165	-0.000261	-0.002092
734	-0.014015	-0.013988	-0.0140015	0.481163	0.474685	-2.7e-05	0.00378	-0.000343	-0.000246	0.000613	-0.000165	0.000118	-0.001067	-0.000999	-0.001665
735	-0.014729	-0.015213	-0.014971	0.480158	0.475122	-4.9e-05	0.003281	-0.000324	-0.000259	0.000613	-0.000169	0.00012	-0.000973	-0.001659	-0.001105
736	-0.01544	-0.016472	-0.015956	0.479269	0.47528	-0.000109	0.002844	-0.000306	-0.000273	0.000611	-0.000172	0.000124	-0.000892	-0.002116	-0.000484
737	-0.016024	-0.017622	-0.016823	0.477589	0.475954	-0.000232	0.002534	-0.000289	-0.000288	0.000606	-0.000175	0.000128	-0.000814	-0.002376	6.4e-05
738	-0.016457	-0.01864	-0.0175485	0.475401	0.476848	-0.000387	0.002372	-0.000274	-0.000302	0.000599	-0.000175	0.000131	-0.000741	-0.002466	0.000476
739	-0.0167	-0.019457	-0.0180785	0.473185	0.477701	-0.000542	0.002358	-0.000264	-0.000315	0.000594	-0.000175	0.000133	-0.000681	-0.002406	0.000736
740	-0.016812	-0.020072	-0.018442	0.471226	0.478247	-0.000664	0.002459	-0.000258	-0.000326	0.000595	-0.000176	0.000134	-0.000639	-0.002242	0.000872
741	-0.016781	-0.020393	-0.018587	0.469093	0.47889	-0.000724	0.002645	-0.000257	-0.000336	0.000599	-0.000175	0.000134	-0.000614	-0.002083	0.000888
742	-0.016532	-0.020467	-0.0184995	0.466928	0.47965	-0.000733	0.002917	-0.000263	-0.000343	0.0006	-0.000172	0.00013	-0.000614	-0.001926	0.000823
743	-0.016173	-0.02026	-0.0182165	0.465146	0.480189	-0.000674	0.003227	-0.000275	-0.00035	0.000599	-0.000167	0.000123	-0.000642	-0.001825	0.000697
744	-0.015693	-0.019904	-0.0177985	0.464766	0.479456	-0.000499	0.003494	-0.000301	-0.000359	0.000595	-0.000164	0.000116	-0.000694	-0.001796	0.000509
745	-0.015049	-0.019229	-0.017139	0.463987	0.479481	-0.000327	0.003796	-0.000328	-0.000371	0.000582	-0.000155	0.000104	-0.000767	-0.001792	0.000277
746	-0.014348	-0.018314	-0.016331	0.463911	0.479259	-0.000117	0.00408	-0.00036	-0.000384	0.000566	-0.000145	8.8e-05	-0.000855	-0.001707	-3.5e-05
747	-0.013579	-0.017253	-0.015416	0.464506	0.47876	0.000109	0.004342	-0.000392	-0.000394	0.000554	-0.000137	7.3e-05	-0.000981	-0.001198	-0.00034
748	-0.012757	-0.016127	-0.014442	0.464816	0.478828	0.000269	0.004608	-0.000415	-0.0004	0.000542	-0.000132	5.8e-05	-0.001122	-0.000408	-0.000645
749	-0.011943	-0.015155	-0.013549	0.466635	0.477662	0.00049	0.00478	-0.000441	-0.000407	0.00054	-0.000131	4.6e-05	-0.001239	0.000339	-0.001004
750	-0.011203	-0.014184	-0.0126935	0.468606	0.476523	0.000707	0.004878	-0.000467	-0.000413	0.000544	-0.00013	3.2e-05	-0.001314	0.00097	-0.001415
751	-0.010498	-0.0132	-0.011849	0.470542	0.475577	0.000921	0.004843	-0.000485	-0.00042	0.000555	-0.00013	1.9e-05	-0.001353	0.001538	-0.001821
752	-0.009805	-0.012267	-0.011036	0.472638	0.474645	0.001146	0.004642	-0.000495	-0.000422	0.000568	-0.000132	8e-06	-0.001352	0.002042	-0.00221
753	-0.008937	-0.01127	-0.0101035	0.473435	0.475082	0.001354	0.004273	-0.000494	-0.000425	0.000586	-0.000135	0	-0.001348	0.002364	-0.002477
754	-0.008146	-0.010309	-0.0092275	0.473977	0.475843	0.001577	0.00373	-0.000485	-0.000425	0.000601	-0.000137	-3e-06	-0.001333	0.002468	-0.002641
755	-0.007385	-0.009331	-0.008358	0.473756	0.477477	0.001774	0.003045	-0.000464	-0.000423	0.000615	-0.00014	0	-0.001321	0.002316	-0.002657
756	-0.006669	-0.00835	-0.0075095	0.472438	0.48021	0.001932	0.00226	-0.000435	-0.000417	0.000625	-0.000143	1e-05	-0.001317	0.001925	-0.002527
757	-0.006174	-0.007479	-0.0068265	0.471821	0.482316	0.002056	0.001416	-0.000403	-0.000413	0.000641	-0.000152	2.9e-05	-0.001327	0.001413	-0.002225
758	-0.005879	-0.006682	-0.0062805	0.469761	0.485752	0.002081	0.0006	-0.000372	-0.00041	0.000662	-0.000162	5.7e-05	-0.001306	0.000787	-0.001871
759	-0.005777	-0.006112	-0.0059445	0.466929	0.489779	0.00199	-0.000157	-0.000342	-0.00041	0.000689	-0.000174	8.8e-05	-0.001211	5.7e-05	-0.001559
760	-0.005901	-0.005765	-0.005833	0.464305	0.493385	0.001802	-0.000821	-0.000316	-0.000411	0.000716	-0.000187	0.000124	-0.001056	-0.000856	-0.001307
761	-0.006141	-0.005705	-0.005923	0.462021	0.496493	0.001542	-0.001347	-0.00029	-0.000413	0.000749	-0.000201	0.00016	-0.000929	-0.001584	-0.00089
762	-0.006507	-0.005954	-0.0062305	0.460246	0.498962	0.001261	-0.001702	-0.000267	-0.000415	0.00078	-0.000218	0.000194	-0.000841	-0.001858	-0.000371
763	-0.00697	-0.006356	-0.006663	0.458945	0.500671	0.001022	-0.001901	-0.000249	-0.000418	0.0008	-0.000234	0.000221	-0.000743	-0.00201	-3.1e-05
764	-0.007448	-0.006961	-0.0072045	0.458412	0.501315	0.000846	-0.001896	-0.000237	-0.000421	0.000799	-0.000245	0.00024	-0.000643	-0.002079	0.000101
765	-0.007935	-0.00766	-0.0077975	0.458531	0.500989	0.000749	-0.001724	-0.000231	-0.000424	0.000783	-0.000254	0.000254	-0.000575	-0.002028	3.2e-05
766	-0.008499	-0.008363	-0.008431	0.45979	0.499201	0.000772	-0.001437	-0.000234	-0.000429	0.000753	-0.000258	0.000262	-0.000544	-0.001846	-0.000249
767	-0.008945	-0.009134	-0.0090395	0.461032	0.497167	0.000905	-0.001032	-0.000248	-0.000434	0.000707	-0.000259	0.000266	-0.000547	-0.001454	-0.000708
768	-0.009362	-0.009828	-0.009595	0.46233	0.494738	0.001112	-0.000568	-0.00027	-0.00044	0.000655	-0.000256	0.000265	-0.000573	-0.000954	-0.00134
769	-0.009758	-0.010406	-0.010082	0.463829	0.491931	0.001402	-8.2e-05	-0.0003	-0.000446	0.0006	-0.000249	0.000259	-0.000618	-0.000383	-0.002101
770	-0.010106	-0.010863	-0.0104845	0.464827	0.489304	0.001738	0.000388	-0.000333	-0.000451	0.000545	-0.000237	0.000248	-0.000679	0.000233	-0.00295
771	-0.01041	-0.011257	-0.0108335	0.465792	0.486538	0.002114	0.00081	-0.000366	-0.000457	0.000493	-0.000222	0.000232	-0.000745	0.000823	-0.003826
772	-0.010716	-0.011456	-0.011086	0.466226	0.484204	0.002506	0.001153	-0.000393	-0.000464	0.000446	-0.000203	0.000211	-0.000819	0.001424	-0.004626
773	-0.010949	-0.011545	-0.011247	0.466058	0.482591	0.002895	0.001391	-0.000412	-0.000472	0.000409	-0.000182	0.000187	-0.000898	0.001991	-0.005214
774	-0.011255	-0.011706	-0.0114805	0.465856	0.481025	0.003282	0.001501	-0.000422	-0.00048	0.00039	-0.000161	0.000161	-0.000994	0.002569	-0.005509
775	-0.011713	-0.011883	-0.011798	0.465791	0.479582	0.003653	0.001465	-0.000421	-0.000487	0.000386	-0.000142	0.000135	-0.001087	0.002985	-0.005514
776	-0.01226	-0.012021	-0.0121405	0.465569	0.478492	0.003961	0.001342	-0.000415	-0.000493	0.000392	-0.000127	0.00011	-0.001156	0.00316	-0.005358
777	-0.01279	-0.012089	-0.0124395	0.465183	0.477919	0.004217	0.001118	-0.000403	-0.000501	0.000412	-0.000118	8.8e-05	-0.001187	0.003068	-0.005132
778	-0.013333	-0.012128	-0.0127305	0.464599	0.477792	0.004396	0.000845	-0.000391	-0.000508	0.000442	-0.000115	7.1e-05	-0.001186	0.002719	-0.00483
779	-0.013913	-0.012184	-0.0130485	0.464337	0.477731	0.00447	0.000518	-0.000379	-0.000518	0.000487	-0.000119	6.3e-05	-0.001169	0.002116	-0.004398
780	-0.01451	-0.012259	-0.0133845	0.463923	0.478071	0.004454	0.000151	-0.000366	-0.000531	0.000541	-0.000126	6.1e-05	-0.001141	0.001318	-0.00386
781	-0.015141	-0.012453	-0.013797	0.464377	0.477741	0.004349	-0.000224	-0.000358	-0.000543	0.000603	-0.000138	6.6e-05	-0.0011	0.000408	-0.003285
782	-0.015707	-0.012481	-0.014094	0.464606	0.47794	0.004185	-0.000554	-0.000351	-0.000554	0.000662	-0.000152	7.4e-05	-0.001061	-0.000521	-0.002626
783	-0.016131	-0.012489	-0.01431	0.465029	0.478111	0.00402	-0.000848	-0.000346	-0.000566	0.000718	-0.000165	8.2e-05	-0.001005	-0.001413	-0.001983
784	-0.016499	-0.012483	-0.014491	0.46606	0.477874	0.003861	-0.00107	-0.000344	-0.000573	0.000763	-0.000178	8.8e-05	-0.000936	-0.002222	-0.001411
785	-0.01687	-0.012432	-0.014651	0.468222	0.476582	0.003745	-0.001207	-0.00035	-0.000572	0.000794	-0.000189	9.3e-05	-0.00086	-0.002943	-0.000953
786	-0.016991	-0.012158	-0.0145745	0.469451	0.476456	0.003664	-0.001216	-0.000359	-0.000567	0.00081	-0.000195	9.6e-05	-0.000793	-0.003523	-0.000612
787	-0.017018	-0.011811	-0.0144145	0.470944	0.476101	0.00364	-0.001121	-0.000374	-0.000555	0.00081	-0.000199	9.9e-05	-0.000738	-0.003938	-0.00043
788	-0.016975	-0.011367	-0.014171	0.472419	0.475904	0.003681	-0.000941	-0.000394	-0.000539	0.000797	-0.000198	0.000101	-0.000692	-0.004239	-0.00041
789	-0.016897	-0.010843	-0.01387	0.47413	0.475504	0.003798	-0.000707	-0.000422	-0.00052	0.000775	-0.000193	0.000103	-0.000656	-0.004498	-0.000555
790	-0.016805	-0.010138	-0.0134715	0.475202	0.475805	0.003985	-0.000415	-0.00045	-0.000503	0.000747	-0.000185	0.000102	-0.000634	-0.004682	-0.000851
791	-0.016733	-0.009565	-0.013149	0.477282	0.474976	0.004217	-9.5e-05	-0.000484	-0.000485	0.000714	-0.000175	0.000103	-0.000616	-0.004856	-0.001309
792	-0.016644	-0.009028	-0.012836	0.479303	0.47415	0.004495	0.000229	-0.00052	-0.000467	0.000681	-0.000163	0.000104	-0.00061	-0.004985	-0.001897
793	-0.01658	-0.008595	-0.0125875	0.481494	0.472999	0.004817	0.000513	-0.000553	-0.000451	0.000651	-0.000152	0.000105	-0.000614	-0.005052	-0.002579
794	-0.01649	-0.008323	-0.0124065	0.483369	0.471785	0.005132	0.000791	-0.000581	-0.000438	0.000626	-0.000141	0.000106	-0.000628	-0.005028	-0.003309
795	-0.01633	-0.008076	-0.012203	0.484096	0.471468	0.005379	0.001098	-0.000601	-0.000431	0.000602	-0.00013	0.000104	-0.000649	-0.004881	-0.004025
796	-0.016243	-0.008074	-0.0121585	0.486128	0.469688	0.005591	0.001412	-0.000618	-0.000429	0.000583	-0.000121	0.000102	-0.000666	-0.004643	-0.004728
797	-0.016107	-0.008221	-0.012164	0.487578	0.468287	0.005733	0.001702	-0.000625	-0.000432	0.000569	-0.000113	9.8e-05	-0.000678	-0.004318	-0.005338
798	-0.015907	-0.008593	-0.01225	0.48885	0.466952	0.00578	0.001956	-0.000623	-0.000441	0.000563	-0.000108	9.2e-05	-0.000679	-0.003977	-0.005777
799	-0.015687	-0.009158	-0.0124225	0.489795	0.465922	0.005705	0.002184	-0.000614	-0.000456	0.000566	-0.000103	8.5e-05	-0.000666	-0.003696	-0.006015
800	-0.015481	-0.009902	-0.0126915	0.49055	0.465017	0.005524	0.002367	-0.000598	-0.000475	0.000575	-9.8e-05	7.8e-05	-0.000633	-0.003539	-0.006049
801	-0.015342	-0.010763	-0.0130525	0.491064	0.464392	0.00525	0.002469	-0.000574	-0.0005	0.000594	-9.4e-05	7e-05	-0.000588	-0.003563	-0.00585
802	-0.015244	-0.011722	-0.013483	0.491467	0.463887	0.004903	0.002511	-0.000543	-0.000527	0.000618	-9.1e-05	6.2e-05	-0.000542	-0.003671	-0.00546
803	-0.015248	-0.012728	-0.013988	0.491907	0.463356	0.004539	0.002471	-0.000507	-0.000556	0.000648	-8.9e-05	5.4e-05	-0.0005	-0.003902	-0.004921
804	-0.015317	-0.013712	-0.0145145	0.492081	0.462978	0.004146	0.002373	-0.000467	-0.000582	0.000679	-8.9e-05	4.8e-05	-0.000468	-0.004138	-0.004287
805	-0.015335	-0.014621	-0.014978	0.492278	0.462461	0.003762	0.002208	-0.000426	-0.000602	0.000709	-9e-05	4.4e-05	-0.000448	-0.004312	-0.00363
806	-0.015313	-0.015336	-0.0153245	0.491765	0.462533	0.003413	0.002006	-0.00039	-0.000615	0.000735	-9.2e-05	4e-05	-0.000442	-0.004356	-0.003037
807	-0.015265	-0.015889	-0.015577	0.491194	0.462676	0.003113	0.001757	-0.000359	-0.00062	0.000759	-9.4e-05	3.9e-05	-0.000448	-0.004347	-0.002493
808	-0.015142	-0.016287	-0.0157145	0.490171	0.46326	0.002884	0.001493	-0.000339	-0.000616	0.000782	-9.6e-05	3.8e-05	-0.000466	-0.00426	-0.002051
809	-0.014909	-0.016467	-0.015688	0.488432	0.464527	0.00271	0.001245	-0.00033	-0.000603	0.000799	-9.8e-05	3.9e-05	-0.000495	-0.004064	-0.001741
810	-0.014624	-0.016519	-0.0155715	0.486562	0.465922	0.002598	0.001019	-0.000332	-0.000582	0.000809	-0.0001	4.2e-05	-0.000526	-0.003806	-0.001575
811	-0.014334	-0.016467	-0.0154005	0.485345	0.466718	0.002608	0.000796	-0.000344	-0.000557	0.000816	-0.000102	4.7e-05	-0.000557	-0.003524	-0.001549
812	-0.01402	-0.016273	-0.0151465	0.484006	0.467782	0.002697	0.000595	-0.000361	-0.000528	0.00082	-0.000105	5.4e-05	-0.000596	-0.003208	-0.001642
813	-0.013644	-0.016006	-0.014825	0.482237	0.469165	0.002861	0.000438	-0.000383	-0.000498	0.000822	-0.00011	6.1e-05	-0.000637	-0.002876	-0.001863
814	-0.013223	-0.015604	-0.0144135	0.480242	0.470768	0.003088	0.000328	-0.000406	-0.00047	0.000824	-0.000116	6.7e-05	-0.000684	-0.002555	-0.002175
815	-0.012779	-0.015104	-0.0139415	0.478549	0.472048	0.003377	0.000261	-0.000431	-0.000445	0.000827	-0.000124	7.1e-05	-0.000731	-0.002253	-0.002571
816	-0.01232	-0.014483	-0.0134015	0.476936	0.473171	0.003707	0.000224	-0.000457	-0.000424	0.000835	-0.000133	7.3e-05	-0.000775	-0.001992	-0.003025
817	-0.011882	-0.0138	-0.012841	0.475189	0.474252	0.00404	0.000228	-0.000482	-0.000409	0.00085	-0.000143	7.6e-05	-0.000811	-0.001831	-0.003506
818	-0.011546	-0.013073	-0.0123095	0.473317	0.475168	0.004349	0.000226	-0.000505	-0.000402	0.000872	-0.000154	8.1e-05	-0.000835	-0.001844	-0.003954
819	-0.01123	-0.012292	-0.011761	0.471094	0.476397	0.004599	0.000215	-0.000521	-0.000402	0.000899	-0.000166	8.8e-05	-0.00085	-0.001999	-0.004296
820	-0.011092	-0.011568	-0.01133	0.46908	0.477363	0.004744	0.000234	-0.000532	-0.000412	0.000929	-0.000179	0.000101	-0.00085	-0.00231	-0.004535
821	-0.011132	-0.011007	-0.0110695	0.467312	0.478087	0.004784	0.000222	-0.000534	-0.000431	0.000962	-0.000195	0.00012	-0.000826	-0.002851	-0.004637
822	-0.011317	-0.010531	-0.010924	0.465338	0.47915	0.004703	0.000218	-0.000525	-0.000457	0.000989	-0.000211	0.00014	-0.000782	-0.003542	-0.004609
823	-0.011612	-0.010248	-0.01093	0.463242	0.480394	0.004452	0.00026	-0.000505	-0.000487	0.001003	-0.000227	0.000165	-0.000728	-0.00427	-0.004438
824	-0.011967	-0.010078	-0.0110225	0.461136	0.481913	0.004093	0.000304	-0.000476	-0.000518	0.001005	-0.000241	0.00019	-0.000675	-0.004918	-0.004114
825	-0.012408	-0.010089	-0.0112485	0.459094	0.483573	0.003654	0.000361	-0.000441	-0.000546	0.000995	-0.000253	0.000215	-0.000634	-0.005304	-0.003679
826	-0.012917	-0.010216	-0.0115665	0.457506	0.485043	0.003179	0.000413	-0.000402	-0.000568	0.000978	-0.000263	0.000237	-0.000615	-0.005299	-0.00318
827	-0.013434	-0.010503	-0.0119685	0.45658	0.486048	0.002704	0.000474	-0.000364	-0.000587	0.000955	-0.00027	0.000254	-0.000605	-0.005004	-0.002723
828	-0.013919	-0.010847	-0.012383	0.456353	0.486573	0.002268	0.000515	-0.00033	-0.0006	0.000929	-0.000273	0.000264	-0.000607	-0.004498	-0.002313
829	-0.014188	-0.011205	-0.0126965	0.456641	0.486759	0.001882	0.000554	-0.000307	-0.000606	0.000899	-0.00027	0.000268	-0.00062	-0.003873	-0.001996
830	-0.014296	-0.011579	-0.0129375	0.457369	0.486587	0.001564	0.000568	-0.000293	-0.000605	0.00087	-0.000263	0.000269	-0.000646	-0.003241	-0.001734
831	-0.014344	-0.01204	-0.013192	0.460272	0.484383	0.001365	0.000538	-0.000289	-0.000601	0.000845	-0.000254	0.000265	-0.000689	-0.00263	-0.001538
832	-0.014079	-0.012415	-0.013247	0.462238	0.483244	0.001263	0.000474	-0.000291	-0.000596	0.000822	-0.000241	0.000256	-0.000742	-0.00213	-0.001388
833	-0.013584	-0.012746	-0.013165	0.463526	0.4829	0.001236	0.000428	-0.000298	-0.000588	0.000801	-0.000228	0.000245	-0.000809	-0.00168	-0.001271
834	-0.013029	-0.013104	-0.0130665	0.466124	0.481304	0.001321	0.000323	-0.000308	-0.000577	0.000782	-0.000216	0.000233	-0.000883	-0.001356	-0.001233
835	-0.012476	-0.013558	-0.013017	0.469748	0.478722	0.001492	0.000202	-0.000321	-0.000563	0.000767	-0.000207	0.000221	-0.000962	-0.001075	-0.001252
836	-0.011891	-0.014049	-0.01297	0.473137	0.476344	0.001727	5.6e-05	-0.000332	-0.000549	0.000758	-0.000202	0.00021	-0.001039	-0.000846	-0.00131
837	-0.01138	-0.014572	-0.012976	0.476477	0.473874	0.002016	-6.8e-05	-0.00034	-0.000536	0.000756	-0.0002	0.000198	-0.00111	-0.000649	-0.001404
838	-0.010986	-0.015088	-0.013037	0.479707	0.471391	0.002339	-0.000195	-0.000344	-0.000527	0.000767	-0.000202	0.000186	-0.001185	-0.000437	-0.001455
839	-0.010715	-0.015602	-0.0131585	0.482774	0.468995	0.002698	-0.000319	-0.000345	-0.00052	0.000789	-0.000207	0.000175	-0.001258	-0.000211	-0.001496
840	-0.010636	-0.01611	-0.013373	0.485284	0.466883	0.003053	-0.000417	-0.000345	-0.000516	0.000825	-0.000215	0.000165	-0.001317	-3.3e-05	-0.001551
841	-0.010717	-0.016506	-0.0136115	0.487231	0.465055	0.00338	-0.000471	-0.000347	-0.000514	0.000869	-0.000224	0.000156	-0.001357	0.000101	-0.001635
842	-0.010971	-0.016826	-0.0138985	0.488419	0.463786	0.003661	-0.00049	-0.000351	-0.000515	0.000917	-0.000232	0.000147	-0.001369	0.000149	-0.001747
843	-0.011354	-0.016968	-0.014161	0.489094	0.462765	0.003856	-0.000466	-0.000358	-0.000516	0.000964	-0.000239	0.00014	-0.001357	0.000141	-0.00189
844	-0.011832	-0.016961	-0.0143965	0.489152	0.462159	0.003958	-0.000426	-0.000368	-0.000517	0.001006	-0.000244	0.000134	-0.001336	4.5e-05	-0.001988
845	-0.01234	-0.016848	-0.014594	0.488618	0.461976	0.003966	-0.000367	-0.000378	-0.00052	0.001041	-0.000245	0.000129	-0.001317	-0.000147	-0.002022
846	-0.012888	-0.016667	-0.0147775	0.487535	0.462103	0.003874	-0.000282	-0.000386	-0.000526	0.001061	-0.000243	0.000124	-0.001297	-0.000428	-0.001983
847	-0.013437	-0.01642	-0.0149285	0.486293	0.462325	0.003699	-0.000197	-0.000392	-0.000536	0.001066	-0.000237	0.000119	-0.001274	-0.00084	-0.001844
848	-0.013981	-0.016124	-0.0150525	0.485055	0.462634	0.003423	-6.4e-05	-0.000395	-0.000549	0.00105	-0.000226	0.000113	-0.001241	-0.00131	-0.001647
849	-0.014533	-0.015941	-0.015237	0.484579	0.462269	0.003072	0.000125	-0.000397	-0.000562	0.001016	-0.000214	0.000107	-0.0012	-0.001767	-0.001394
850	-0.014925	-0.015712	-0.0153185	0.483436	0.462653	0.002692	0.000324	-0.000396	-0.000574	0.00097	-0.000201	0.000102	-0.001154	-0.00212	-0.001111
851	-0.015203	-0.015509	-0.015356	0.482257	0.463193	0.002294	0.000543	-0.000396	-0.000581	0.000918	-0.000189	9.9e-05	-0.001118	-0.002233	-0.000803
852	-0.015418	-0.015301	-0.0153595	0.481245	0.463914	0.001912	0.000801	-0.000397	-0.000582	0.000864	-0.000178	9.9e-05	-0.001093	-0.002074	-0.000495
853	-0.01562	-0.015059	-0.0153395	0.480546	0.464724	0.001562	0.001072	-0.000403	-0.000576	0.000811	-0.000169	0.000102	-0.001066	-0.001742	-0.000222
854	-0.015854	-0.014804	-0.015329	0.481108	0.464515	0.001284	0.001305	-0.000415	-0.000566	0.000769	-0.000167	0.00011	-0.001045	-0.001237	-2.3e-05
855	-0.015967	-0.014449	-0.015208	0.480598	0.465644	0.001042	0.00154	-0.000426	-0.000554	0.000735	-0.000168	0.000118	-0.001033	-0.000627	0.000138
856	-0.015985	-0.014055	-0.01502	0.480057	0.466899	0.000856	0.001761	-0.00044	-0.000542	0.000708	-0.000172	0.000128	-0.001028	-7.8e-05	0.000261
857	-0.015805	-0.013572	-0.0146885	0.479685	0.468041	0.000747	0.001964	-0.000458	-0.000532	0.00069	-0.000182	0.000138	-0.001033	0.000338	0.000331
858	-0.015529	-0.01308	-0.0143045	0.48021	0.468391	0.000716	0.002142	-0.000479	-0.000524	0.000682	-0.000195	0.00015	-0.001051	0.000673	0.000372
859	-0.015091	-0.012516	-0.0138035	0.480326	0.469121	0.000735	0.002285	-0.000496	-0.000519	0.000685	-0.000211	0.000163	-0.001084	0.000951	0.0004
860	-0.014531	-0.011905	-0.013218	0.480681	0.469453	0.000819	0.002362	-0.000511	-0.000517	0.000703	-0.000232	0.000179	-0.001129	0.001122	0.000427
861	-0.01394	-0.011327	-0.0126335	0.481379	0.469182	0.00095	0.002367	-0.000519	-0.000519	0.000737	-0.000256	0.000196	-0.001185	0.001173	0.000469
862	-0.013308	-0.010742	-0.012025	0.481764	0.468913	0.001119	0.002307	-0.000524	-0.000523	0.000782	-0.00028	0.000214	-0.001254	0.001109	0.000499
863	-0.012658	-0.010185	-0.0114215	0.481808	0.468786	0.001306	0.002158	-0.000521	-0.000527	0.000842	-0.000306	0.000232	-0.001328	0.000951	0.000558
864	-0.012042	-0.009692	-0.010867	0.481158	0.469169	0.001472	0.001947	-0.000509	-0.000531	0.000909	-0.00033	0.000248	-0.001404	0.000738	0.000647
865	-0.011532	-0.009336	-0.010434	0.479899	0.469923	0.001624	0.00166	-0.000489	-0.000537	0.000978	-0.000351	0.000263	-0.001478	0.000479	0.000751
866	-0.011159	-0.009182	-0.0101705	0.478323	0.471003	0.001726	0.00135	-0.000461	-0.000544	0.001044	-0.000367	0.000273	-0.001553	0.000214	0.000919
867	-0.010928	-0.009227	-0.0100775	0.476211	0.472528	0.001771	0.001018	-0.000433	-0.000549	0.001101	-0.000377	0.000278	-0.001619	-5.1e-05	0.001124
868	-0.010891	-0.009507	-0.010199	0.473829	0.474333	0.001737	0.00072	-0.000406	-0.000553	0.001142	-0.000378	0.000278	-0.001677	-0.000305	0.001382
869	-0.010991	-0.009951	-0.010471	0.471136	0.476412	0.001652	0.000442	-0.000382	-0.000556	0.001166	-0.000369	0.00027	-0.001732	-0.000566	0.001701
870	-0.011124	-0.010537	-0.0108305	0.468134	0.478816	0.001509	0.000212	-0.000361	-0.000558	0.00117	-0.000349	0.000256	-0.001783	-0.000796	0.002059
871	-0.011239	-0.011208	-0.0112235	0.464943	0.481366	0.001318	9e-05	-0.000343	-0.000561	0.001154	-0.000322	0.000239	-0.001832	-0.000933	0.00239
872	-0.011381	-0.01204	-0.0117105	0.462432	0.48303	0.001082	6.7e-05	-0.000331	-0.000564	0.001123	-0.000291	0.000221	-0.001885	-0.00099	0.002652
873	-0.01146	-0.012834	-0.012147	0.459724	0.484993	0.000793	0.000226	-0.000318	-0.000565	0.001072	-0.000259	0.000202	-0.001937	-0.000876	0.00284
874	-0.011476	-0.013486	-0.012481	0.457411	0.48655	0.000496	0.0005	-0.00031	-0.000564	0.001013	-0.000226	0.000184	-0.001989	-0.000684	0.002937
875	-0.011508	-0.013994	-0.012751	0.455867	0.487513	0.000216	0.000879	-0.000305	-0.00056	0.000951	-0.000195	0.000167	-0.002035	-0.000418	0.002934
876	-0.011486	-0.014316	-0.012901	0.455086	0.487889	-2e-05	0.001322	-0.000306	-0.000553	0.000889	-0.000169	0.000152	-0.002072	-0.000107	0.002852
877	-0.011475	-0.014492	-0.0129835	0.455344	0.487375	-0.000206	0.001843	-0.000317	-0.000542	0.000825	-0.000147	0.000138	-0.002095	0.000252	0.002711
878	-0.011349	-0.014417	-0.012883	0.456169	0.486487	-0.000347	0.002448	-0.000338	-0.000529	0.000763	-0.000132	0.000128	-0.002102	0.000648	0.002504
879	-0.011234	-0.014168	-0.012701	0.457889	0.484803	-0.000439	0.00308	-0.000368	-0.000514	0.000708	-0.000124	0.000121	-0.002089	0.001064	0.002241
880	-0.011015	-0.013791	-0.012403	0.460436	0.482513	-0.000471	0.003709	-0.000404	-0.0005	0.000666	-0.000124	0.00012	-0.002058	0.001497	0.001941
881	-0.01072	-0.013306	-0.012013	0.463665	0.47976	-0.000436	0.004293	-0.000443	-0.000489	0.000636	-0.000133	0.000123	-0.002009	0.001915	0.001598
882	-0.010293	-0.01269	-0.0114915	0.466934	0.477152	-0.000366	0.004831	-0.000477	-0.00048	0.000621	-0.00015	0.000132	-0.001944	0.002318	0.001243
883	-0.009817	-0.011998	-0.0109075	0.470441	0.474584	-0.000303	0.005319	-0.000496	-0.000478	0.000622	-0.000176	0.000149	-0.001871	0.002724	0.000903
884	-0.009306	-0.011317	-0.0103115	0.474236	0.471544	-0.000167	0.005705	-0.000507	-0.000481	0.000632	-0.000209	0.000171	-0.00179	0.00311	0.000518
885	-0.008795	-0.010693	-0.009744	0.477834	0.468674	-3.1e-05	0.006024	-0.000504	-0.000487	0.000651	-0.000248	0.000198	-0.001706	0.003459	0.000125
886	-0.008349	-0.010152	-0.0092505	0.481216	0.466077	0.000114	0.006216	-0.000486	-0.000494	0.000677	-0.000288	0.00023	-0.00163	0.003787	-0.000219
887	-0.007988	-0.0096	-0.008794	0.484147	0.463916	0.000265	0.006284	-0.000457	-0.000502	0.000707	-0.000325	0.000264	-0.001572	0.004068	-0.000447
888	-0.00772	-0.009122	-0.008421	0.486321	0.462551	0.000361	0.006237	-0.000411	-0.000508	0.000742	-0.000358	0.0003	-0.001523	0.004335	-0.000515
889	-0.007703	-0.008797	-0.00825	0.487883	0.461728	0.000442	0.0061	-0.000366	-0.000506	0.000778	-0.00038	0.000329	-0.001472	0.004516	-0.000494
890	-0.00794	-0.008688	-0.008314	0.489173	0.461171	0.000448	0.005901	-0.000319	-0.000499	0.000813	-0.000396	0.000356	-0.001418	0.004632	-0.000381
891	-0.008483	-0.008765	-0.008624	0.489509	0.461466	0.000382	0.005663	-0.000277	-0.000482	0.00084	-0.0004	0.000374	-0.001358	0.004709	-0.000208
892	-0.009201	-0.008998	-0.0090995	0.48899	0.462475	0.000223	0.005457	-0.000243	-0.000454	0.000851	-0.000394	0.000383	-0.001299	0.004831	-1.1e-05
893	-0.010092	-0.009352	-0.009722	0.487875	0.463842	-2.4e-05	0.005319	-0.000215	-0.000419	0.000843	-0.000376	0.000383	-0.001246	0.004988	0.000186
894	-0.011243	-0.009944	-0.0105935	0.486537	0.465031	-0.000324	0.005297	-0.000197	-0.000376	0.000814	-0.000347	0.000375	-0.001201	0.005177	0.000336
895	-0.012505	-0.010693	-0.011599	0.484648	0.466212	-0.000686	0.005424	-0.000183	-0.000329	0.000766	-0.000311	0.000359	-0.001161	0.005399	0.000412
896	-0.013869	-0.011654	-0.0127615	0.482586	0.466924	-0.001072	0.005685	-0.00017	-0.000278	0.000707	-0.000274	0.000337	-0.001128	0.005605	0.000408
897	-0.015246	-0.012784	-0.014015	0.480433	0.467043	-0.001437	0.006027	-0.000158	-0.00023	0.000644	-0.000237	0.00031	-0.001107	0.00573	0.000342
898	-0.016626	-0.014074	-0.01535	0.478365	0.466474	-0.00177	0.00643	-0.000144	-0.000186	0.000583	-0.000201	0.00028	-0.001105	0.005729	0.000263
899	-0.018042	-0.015517	-0.0167795	0.476769	0.464989	-0.00204	0.006827	-0.000128	-0.000148	0.000528	-0.000169	0.000249	-0.001124	0.005574	0.000214
900	-0.019353	-0.016978	-0.0181655	0.475182	0.463373	-0.002267	0.007194	-0.000108	-0.000115	0.000476	-0.000141	0.000217	-0.00116	0.00529	0.000223
901	-0.020566	-0.018397	-0.0194815	0.474103	0.461513	-0.002439	0.007515	-8.3e-05	-8.9e-05	0.000429	-0.00012	0.000187	-0.00121	0.004893	0.000288
902	-0.021668	-0.019654	-0.020661	0.473741	0.45952	-0.002555	0.007786	-5.4e-05	-7.2e-05	0.000387	-0.000103	0.000158	-0.001284	0.004388	0.000443
903	-0.022613	-0.020793	-0.021703	0.473793	0.457912	-0.00264	0.008015	-2.2e-05	-6.2e-05	0.00035	-9.1e-05	0.000134	-0.001377	0.00388	0.000695
904	-0.023382	-0.021873	-0.0226275	0.474796	0.456246	-0.002692	0.008196	1.2e-05	-5.7e-05	0.000319	-8.5e-05	0.000114	-0.001447	0.003364	0.000932
905	-0.024047	-0.022869	-0.023458	0.476939	0.454346	-0.002709	0.00835	4.7e-05	-5.5e-05	0.000294	-8.2e-05	9.9e-05	-0.001488	0.002854	0.001113
906	-0.024482	-0.023643	-0.0240625	0.47914	0.453328	-0.002751	0.008531	8.2e-05	-4.7e-05	0.000275	-8.1e-05	8.7e-05	-0.001516	0.002398	0.00127
907	-0.024778	-0.024367	-0.0245725	0.482962	0.451245	-0.002668	0.00864	0.000102	-4.2e-05	0.000261	-8.3e-05	8.2e-05	-0.001533	0.002032	0.001363
908	-0.024922	-0.025066	-0.024994	0.48736	0.449225	-0.002603	0.008774	0.000117	-3.2e-05	0.000252	-9e-05	8.3e-05	-0.001539	0.001812	0.001426
909	-0.024953	-0.025704	-0.0253285	0.492311	0.446934	-0.002487	0.00887	0.00012	-2e-05	0.000243	-9.8e-05	9e-05	-0.001541	0.001716	0.001447
910	-0.024841	-0.026224	-0.0255325	0.496759	0.44537	-0.002421	0.00901	0.000119	3e-06	0.00023	-0.000107	0.000101	-0.001538	0.001757	0.001436
911	-0.024673	-0.026632	-0.0256525	0.5013	0.443924	-0.002384	0.009174	0.00011	3.6e-05	0.000213	-0.000115	0.000116	-0.001532	0.001949	0.001382
912	-0.024511	-0.026958	-0.0257345	0.506208	0.441977	-0.002283	0.009265	8.7e-05	6.9e-05	0.000191	-0.000122	0.000136	-0.001525	0.002279	0.001242
913	-0.024129	-0.026971	-0.02555	0.509233	0.441836	-0.002346	0.009432	6.6e-05	0.000118	0.000169	-0.000125	0.000156	-0.001507	0.002774	0.001046
914	-0.023638	-0.02666	-0.025149	0.511074	0.44271	-0.002436	0.009579	3.9e-05	0.000171	0.00015	-0.000127	0.000176	-0.001468	0.003447	0.000732
915	-0.023145	-0.026184	-0.0246645	0.512399	0.443778	-0.002616	0.009738	1.7e-05	0.000222	0.000141	-0.000129	0.000198	-0.001426	0.004307	0.000375
916	-0.022645	-0.025582	-0.0241135	0.512923	0.445242	-0.002841	0.009897	0	0.000268	0.00014	-0.000132	0.000221	-0.001392	0.005327	-9e-06
917	-0.022043	-0.024806	-0.0234245	0.5126	0.446924	-0.003013	0.01001	-1.7e-05	0.000308	0.00014	-0.000138	0.000242	-0.001338	0.006371	-0.0005
918	-0.021315	-0.023719	-0.022517	0.510644	0.449922	-0.003283	0.010198	-2.2e-05	0.000345	0.000141	-0.000143	0.00026	-0.001277	0.007406	-0.00097
919	-0.020547	-0.022503	-0.021525	0.507819	0.453276	-0.003509	0.010376	-2e-05	0.000375	0.000139	-0.000145	0.000273	-0.001227	0.008257	-0.00139
920	-0.019736	-0.021173	-0.0204545	0.504176	0.457149	-0.003739	0.010556	-8e-06	0.000398	0.000134	-0.000147	0.000282	-0.001186	0.008883	-0.001701
921	-0.018905	-0.019868	-0.0193865	0.50048	0.460715	-0.003873	0.010648	1e-05	0.000407	0.000122	-0.00015	0.000287	-0.00116	0.009241	-0.001898
922	-0.018054	-0.018571	-0.0183125	0.496598	0.464331	-0.003968	0.010672	3.6e-05	0.000407	0.000103	-0.000155	0.00029	-0.001149	0.009391	-0.001972
923	-0.017208	-0.017386	-0.017297	0.493568	0.467078	-0.00407	0.010638	7.7e-05	0.000395	8.1e-05	-0.000165	0.000293	-0.00115	0.009384	-0.001896
924	-0.016353	-0.0163	-0.0163265	0.490076	0.470195	-0.004118	0.010514	0.000124	0.000377	4.8e-05	-0.000174	0.000289	-0.001162	0.009079	-0.001688
925	-0.015534	-0.015298	-0.015416	0.487053	0.47288	-0.00416	0.010352	0.000182	0.000352	1.8e-05	-0.000185	0.000282	-0.001183	0.008566	-0.00134
926	-0.014783	-0.014387	-0.014585	0.484614	0.474998	-0.004195	0.010158	0.000247	0.000321	-6e-06	-0.000198	0.000274	-0.001206	0.0079	-0.000914
927	-0.014105	-0.013622	-0.0138635	0.483126	0.476197	-0.0042	0.00992	0.000316	0.000284	-1.9e-05	-0.000214	0.000265	-0.001231	0.007114	-0.000424
928	-0.013535	-0.012937	-0.013236	0.481382	0.477574	-0.004267	0.009772	0.00039	0.000258	-2.6e-05	-0.000229	0.000256	-0.001249	0.006333	8.1e-05
929	-0.013238	-0.012613	-0.0129255	0.481503	0.477064	-0.004226	0.009606	0.000452	0.000226	-2.2e-05	-0.000246	0.00025	-0.001278	0.005556	0.00054
930	-0.013282	-0.012567	-0.0129245	0.483199	0.475141	-0.004144	0.009489	0.000504	0.000199	-1.2e-05	-0.000261	0.000245	-0.001316	0.004863	0.000948
931	-0.013584	-0.012706	-0.013145	0.485461	0.47265	-0.004027	0.009433	0.000542	0.00018	0	-0.000274	0.000244	-0.001362	0.004312	0.001275
932	-0.014126	-0.013077	-0.0136015	0.488193	0.469745	-0.003883	0.009437	0.000564	0.000172	1e-05	-0.000285	0.000247	-0.001416	0.003966	0.001498
933	-0.014766	-0.013515	-0.0141405	0.490566	0.467162	-0.003745	0.009501	0.000569	0.000179	1.6e-05	-0.000294	0.000253	-0.001469	0.003872	0.001596
934	-0.01553	-0.014073	-0.0148015	0.492399	0.46516	-0.003673	0.009652	0.000566	0.0002	1.9e-05	-0.000299	0.000262	-0.001511	0.004072	0.001584
935	-0.016376	-0.014872	-0.015624	0.494258	0.46316	-0.003548	0.009771	0.000544	0.000229	1.5e-05	-0.0003	0.000271	-0.001547	0.004429	0.001445
936	-0.017242	-0.015874	-0.016558	0.496234	0.460999	-0.003358	0.009836	0.000508	0.00026	7e-06	-0.000295	0.000279	-0.001564	0.00487	0.001198
937	-0.018018	-0.016844	-0.017431	0.497001	0.460098	-0.003307	0.009952	0.000472	0.0003	-7e-06	-0.000286	0.000286	-0.001541	0.005465	0.000916
938	-0.018755	-0.01784	-0.0182975	0.496793	0.46007	-0.003307	0.010061	0.000436	0.000341	-2.6e-05	-0.000273	0.000289	-0.001484	0.006037	0.000635
939	-0.019357	-0.018902	-0.0191295	0.496327	0.460104	-0.003321	0.010104	0.000399	0.000373	-4.6e-05	-0.000257	0.000289	-0.001411	0.0065	0.000397
940	-0.019773	-0.019924	-0.0198485	0.494186	0.461487	-0.00335	0.010075	0.000369	0.000398	-6.8e-05	-0.000237	0.000283	-0.001325	0.006793	0.00023
941	-0.019963	-0.020994	-0.0204785	0.491887	0.462867	-0.003414	0.009971	0.000352	0.000409	-8.5e-05	-0.000219	0.000274	-0.001237	0.006949	0.000172
942	-0.019965	-0.022044	-0.0210045	0.488752	0.464867	-0.003496	0.009802	0.00035	0.000407	-9.9e-05	-0.000203	0.000263	-0.001151	0.006938	0.000217
943	-0.019834	-0.023043	-0.0214385	0.485191	0.467068	-0.003564	0.009549	0.00036	0.000393	-0.000107	-0.00019	0.000251	-0.00108	0.006731	0.000353
944	-0.01958	-0.023963	-0.0217715	0.481505	0.469187	-0.003604	0.009222	0.000384	0.000366	-0.000111	-0.000181	0.000239	-0.001028	0.006327	0.000578
945	-0.019247	-0.024774	-0.0220105	0.478023	0.471116	-0.00362	0.008847	0.000417	0.000332	-0.00011	-0.000176	0.00023	-0.000992	0.005761	0.000865
946	-0.018817	-0.025369	-0.022093	0.474544	0.473156	-0.003619	0.00847	0.000458	0.000297	-0.000106	-0.000174	0.000221	-0.000961	0.005105	0.001158
947	-0.018299	-0.025758	-0.0220285	0.471464	0.475099	-0.003608	0.008134	0.000504	0.000264	-9.8e-05	-0.000176	0.000213	-0.00093	0.004418	0.00145
948	-0.017761	-0.025931	-0.021846	0.469366	0.476396	-0.003575	0.00782	0.00055	0.000232	-8.5e-05	-0.000181	0.000208	-0.000905	0.003725	0.001726
949	-0.017262	-0.025792	-0.021527	0.468061	0.477273	-0.003548	0.00758	0.000595	0.000204	-6.8e-05	-0.000187	0.000206	-0.000892	0.003083	0.001985
950	-0.016729	-0.025388	-0.0210585	0.467242	0.478048	-0.003511	0.007401	0.000633	0.000182	-4.7e-05	-0.000196	0.000205	-0.000894	0.002499	0.002216
951	-0.016246	-0.024741	-0.0204935	0.467727	0.477932	-0.003452	0.007278	0.000661	0.000165	-2.3e-05	-0.000206	0.000209	-0.000916	0.00203	0.002417
952	-0.015716	-0.023832	-0.019774	0.468892	0.477656	-0.003396	0.007233	0.000677	0.000156	1e-06	-0.000217	0.000215	-0.000956	0.001697	0.002565
953	-0.015258	-0.022601	-0.0189295	0.470647	0.47732	-0.003355	0.007246	0.00068	0.000154	2.3e-05	-0.000227	0.000223	-0.001005	0.001525	0.002663
954	-0.014863	-0.021326	-0.0180945	0.47338	0.476294	-0.003276	0.007293	0.000664	0.000159	4e-05	-0.000236	0.000233	-0.001065	0.001517	0.002667
955	-0.014589	-0.020145	-0.017367	0.478072	0.473726	-0.003194	0.007389	0.000636	0.000165	5e-05	-0.000246	0.000247	-0.001118	0.001808	0.002572
956	-0.01436	-0.018885	-0.0166225	0.481242	0.472662	-0.003117	0.007519	0.000594	0.000186	4.8e-05	-0.000252	0.000257	-0.001165	0.002287	0.00238
957	-0.014241	-0.017653	-0.015947	0.484369	0.471831	-0.003045	0.007641	0.000544	0.000214	3.6e-05	-0.000254	0.000267	-0.001203	0.003005	0.002128
958	-0.01419	-0.016492	-0.015341	0.487187	0.471467	-0.002989	0.007767	0.000486	0.000249	1.1e-05	-0.000254	0.000276	-0.001229	0.00393	0.00181
959	-0.014222	-0.015526	-0.014874	0.490009	0.471156	-0.00293	0.007866	0.000427	0.000284	-1.9e-05	-0.000252	0.000284	-0.001236	0.00495	0.001447
960	-0.014294	-0.014703	-0.0144985	0.492242	0.471435	-0.002937	0.007954	0.000374	0.000319	-5.6e-05	-0.000246	0.000291	-0.001216	0.006015	0.001078
961	-0.014407	-0.014068	-0.0142375	0.494301	0.471738	-0.002948	0.008007	0.000325	0.000351	-9.2e-05	-0.000241	0.000297	-0.001188	0.006984	0.000736
962	-0.014517	-0.013628	-0.0140725	0.495514	0.472555	-0.003	0.008032	0.000287	0.000376	-0.000127	-0.000237	0.000303	-0.001162	0.007762	0.000471
963	-0.014729	-0.013429	-0.014079	0.496696	0.473041	-0.003039	0.007987	0.000258	0.00039	-0.000154	-0.000236	0.000309	-0.001148	0.008312	0.000309
964	-0.014909	-0.013474	-0.0141915	0.497639	0.473238	-0.003034	0.007872	0.000237	0.000394	-0.000173	-0.000238	0.000313	-0.001155	0.008614	0.000226
965	-0.015119	-0.013667	-0.014393	0.498362	0.473245	-0.003073	0.007721	0.000231	0.000387	-0.000183	-0.000245	0.00032	-0.001169	0.008734	0.000251
966	-0.01536	-0.014098	-0.014729	0.499019	0.47284	-0.003088	0.00752	0.000237	0.000372	-0.000187	-0.000256	0.000324	-0.001188	0.008651	0.000358
967	-0.015635	-0.01476	-0.0151975	0.499067	0.472502	-0.003105	0.007298	0.000255	0.00035	-0.000185	-0.000268	0.000325	-0.001209	0.008366	0.000531
968	-0.016004	-0.015607	-0.0158055	0.499249	0.471659	-0.003104	0.007068	0.000282	0.000323	-0.000178	-0.00028	0.000324	-0.001221	0.007953	0.000757
969	-0.016404	-0.016547	-0.0164755	0.499898	0.470072	-0.003079	0.006854	0.000314	0.000289	-0.000162	-0.000293	0.00032	-0.001228	0.007481	0.001008
970	-0.016754	-0.01757	-0.017162	0.500346	0.468275	-0.003055	0.006681	0.00035	0.000253	-0.000143	-0.000306	0.000315	-0.001236	0.00696	0.001276
971	-0.017134	-0.018553	-0.0178435	0.500478	0.466678	-0.003064	0.006573	0.000391	0.000219	-0.000119	-0.000315	0.000308	-0.00124	0.006477	0.001554
972	-0.017451	-0.019552	-0.0185015	0.500714	0.464559	-0.003014	0.006484	0.000425	0.000185	-9e-05	-0.00032	0.000299	-0.001266	0.005976	0.001814
973	-0.01768	-0.020437	-0.0190585	0.500568	0.462635	-0.002958	0.006443	0.000454	0.000155	-5.7e-05	-0.000323	0.000293	-0.001308	0.005568	0.002039
974	-0.017732	-0.021054	-0.019393	0.498824	0.462061	-0.002891	0.006442	0.000473	0.000134	-2.5e-05	-0.000324	0.000287	-0.001362	0.005285	0.002178
975	-0.01771	-0.021544	-0.019627	0.497645	0.460956	-0.002826	0.006468	0.000485	0.000118	1.1e-05	-0.000327	0.00029	-0.00142	0.005233	0.002224
976	-0.017599	-0.0218	-0.0196995	0.49582	0.46044	-0.002766	0.006513	0.000487	0.000109	4.4e-05	-0.000331	0.000298	-0.001473	0.005417	0.002157
977	-0.017355	-0.021776	-0.0195655	0.493455	0.460522	-0.002712	0.006581	0.000479	0.000107	7.2e-05	-0.000337	0.000312	-0.001514	0.005867	0.001978
978	-0.017035	-0.021571	-0.019303	0.49069	0.46105	-0.002654	0.006647	0.000462	0.000113	9.1e-05	-0.000343	0.000332	-0.00155	0.006515	0.001729
979	-0.016567	-0.021047	-0.018807	0.486851	0.462855	-0.002631	0.006724	0.000439	0.000129	0.0001	-0.000349	0.000353	-0.001563	0.007318	0.001433
980	-0.016054	-0.020248	-0.018151	0.482662	0.465149	-0.002587	0.006772	0.000407	0.000149	0.000102	-0.000356	0.000376	-0.001557	0.008164	0.001116
981	-0.015478	-0.019205	-0.0173415	0.478072	0.468103	-0.002541	0.006798	0.000369	0.000175	9.6e-05	-0.000366	0.000399	-0.00152	0.009105	0.000781
982	-0.014875	-0.017936	-0.0164055	0.472657	0.472246	-0.002521	0.006798	0.000333	0.000206	8.3e-05	-0.000372	0.000418	-0.00146	0.009975	0.000489
983	-0.014263	-0.016442	-0.0153525	0.466522	0.477524	-0.002562	0.006792	0.000302	0.000244	6.2e-05	-0.000379	0.000435	-0.001383	0.010813	0.000265
984	-0.013715	-0.014935	-0.014325	0.460823	0.482494	-0.002516	0.006714	0.000269	0.000276	4e-05	-0.000387	0.000449	-0.001333	0.011388	0.000101
985	-0.013028	-0.01343	-0.013229	0.454535	0.488383	-0.002527	0.006632	0.000244	0.000308	1.4e-05	-0.000395	0.000462	-0.001285	0.011748	2.5e-05
986	-0.012304	-0.012007	-0.0121555	0.448798	0.494011	-0.00254	0.006523	0.000227	0.000332	-1e-05	-0.000404	0.000474	-0.001252	0.011877	2.3e-05
987	-0.011564	-0.010666	-0.011115	0.443586	0.499252	-0.002548	0.006411	0.000218	0.00035	-3.3e-05	-0.000414	0.000485	-0.001233	0.011803	7.3e-05
988	-0.010763	-0.009464	-0.0101135	0.438726	0.504179	-0.002575	0.006305	0.00022	0.000361	-5.2e-05	-0.000424	0.000494	-0.001231	0.011531	0.000186
989	-0.01	-0.00854	-0.00927	0.436478	0.506571	-0.002597	0.006203	0.00023	0.000359	-6.3e-05	-0.000435	0.000506	-0.00124	0.011178	0.000346
990	-0.009228	-0.007704	-0.008466	0.43439	0.50872	-0.002597	0.00611	0.000246	0.000354	-7.2e-05	-0.000442	0.000511	-0.001256	0.010611	0.00053
991	-0.008547	-0.007125	-0.007836	0.434125	0.509051	-0.002577	0.006023	0.000266	0.000342	-7.6e-05	-0.000445	0.000513	-0.001276	0.009925	0.000754
992	-0.007946	-0.006764	-0.007355	0.435348	0.507833	-0.002542	0.005955	0.00029	0.000325	-7.5e-05	-0.000442	0.000511	-0.001298	0.009158	0.001004
993	-0.007492	-0.006673	-0.0070825	0.437924	0.505157	-0.002495	0.005908	0.000312	0.000306	-6.9e-05	-0.000431	0.000504	-0.001328	0.008274	0.001281
994	-0.007189	-0.006796	-0.0069925	0.441862	0.500948	-0.002403	0.005868	0.000332	0.000282	-5.8e-05	-0.000417	0.000493	-0.001377	0.007266	0.001577
995	-0.006874	-0.006912	-0.006893	0.444937	0.497586	-0.002391	0.005892	0.000352	0.000266	-4.2e-05	-0.000394	0.000481	-0.001433	0.006339	0.00186
996	-0.006814	-0.007251	-0.0070325	0.449497	0.492558	-0.002312	0.005919	0.000366	0.000247	-2.1e-05	-0.000372	0.000473	-0.001517	0.005548	0.002079
997	-0.006855	-0.007663	-0.007259	0.45405	0.487545	-0.002246	0.00597	0.000376	0.000232	2e-06	-0.00035	0.00047	-0.001605	0.004993	0.002216
998	-0.007111	-0.00802	-0.0075655	0.458306	0.482843	-0.002162	0.006035	0.00038	0.000222	2.5e-05	-0.000331	0.000465	-0.001697	0.004611	0.002273
999	-0.007484	-0.008285	-0.0078845	0.46162	0.479278	-0.002099	0.006111	0.000382	0.000217	4.6e-05	-0.000316	0.000462	-0.001773	0.004449	0.002242
1000	-0.007997	-0.00856	-0.0082785	0.464753	0.476091	-0.002026	0.006182	0.00038	0.000215	6.2e-05	-0.000307	0.000458	-0.001824	0.004474	0.002151
1001	-0.008694	-0.008777	-0.0087355	0.467236	0.473848	-0.00196	0.006247	0.000373	0.00022	7e-05	-0.0003	0.00045	-0.001838	0.004653	0.002007
1002	-0.009459	-0.008988	-0.0092235	0.46877	0.47277	-0.001932	0.006302	0.000365	0.000229	7.2e-05	-0.000295	0.000438	-0.001801	0.004955	0.001843
1003	-0.010284	-0.009233	-0.0097585	0.469414	0.472778	-0.001922	0.006336	0.000355	0.000242	6.8e-05	-0.000291	0.000421	-0.001712	0.005351	0.001677
1004	-0.011147	-0.00947	-0.0103085	0.469401	0.473603	-0.00195	0.006351	0.000344	0.000258	6.3e-05	-0.000288	0.000404	-0.001577	0.005846	0.001521
1005	-0.012044	-0.009755	-0.0108995	0.468891	0.474936	-0.001976	0.006338	0.000332	0.000275	5.4e-05	-0.000285	0.000385	-0.001431	0.006327	0.001382
1006	-0.012848	-0.009994	-0.011421	0.467798	0.476849	-0.002019	0.006285	0.000323	0.000295	4.5e-05	-0.000286	0.00037	-0.001286	0.006814	0.001257
1007	-0.013624	-0.010248	-0.011936	0.466546	0.478882	-0.002054	0.006194	0.000318	0.000311	3.8e-05	-0.00029	0.000359	-0.001161	0.007208	0.001173
1008	-0.014442	-0.010539	-0.0124905	0.465472	0.480541	-0.002045	0.006057	0.000315	0.000321	3.4e-05	-0.000298	0.000353	-0.001072	0.007458	0.001144
1009	-0.015171	-0.010919	-0.013045	0.464031	0.482606	-0.002077	0.005926	0.000317	0.000333	3.4e-05	-0.000307	0.000352	-0.001001	0.007635	0.001162
1010	-0.015908	-0.011299	-0.0136035	0.462167	0.485027	-0.002083	0.005773	0.000321	0.000343	3.6e-05	-0.000316	0.000352	-0.00097	0.007605	0.001227
1011	-0.016709	-0.011994	-0.0143515	0.463231	0.484546	-0.002019	0.005596	0.000328	0.000339	4.7e-05	-0.00033	0.000359	-0.000971	0.007504	0.001331
1012	-0.017368	-0.012785	-0.0150765	0.46455	0.483895	-0.001939	0.005426	0.000336	0.000331	6.1e-05	-0.000344	0.000368	-0.000998	0.007276	0.001443
1013	-0.017924	-0.013643	-0.0157835	0.466252	0.48297	-0.001877	0.005287	0.000348	0.000324	7.7e-05	-0.000357	0.000379	-0.001034	0.007049	0.001552
1014	-0.018393	-0.0146	-0.0164965	0.468598	0.481411	-0.001792	0.005157	0.000359	0.000316	9.5e-05	-0.000372	0.000394	-0.00109	0.006801	0.001651
1015	-0.018842	-0.015783	-0.0173125	0.472552	0.478254	-0.001688	0.005055	0.00037	0.000304	0.000116	-0.000388	0.000416	-0.001159	0.006581	0.00173
1016	-0.019144	-0.016802	-0.017973	0.474322	0.477225	-0.001662	0.00502	0.00038	0.000306	0.000134	-0.000398	0.000436	-0.001224	0.00635	0.001778
1017	-0.019434	-0.018095	-0.0187645	0.478613	0.473564	-0.001471	0.004953	0.000384	0.000286	0.000157	-0.000412	0.000457	-0.001334	0.006003	0.001838
1018	-0.019678	-0.019367	-0.0195225	0.482666	0.470047	-0.001323	0.004943	0.000386	0.000273	0.000178	-0.000422	0.000479	-0.001428	0.005796	0.001849
1019	-0.019887	-0.020538	-0.0202125	0.486502	0.466639	-0.001168	0.004945	0.000387	0.000258	0.000201	-0.000432	0.000497	-0.001516	0.005647	0.001836
1020	-0.019986	-0.021595	-0.0207905	0.489402	0.464016	-0.001033	0.004962	0.000388	0.000243	0.000224	-0.000438	0.00051	-0.001583	0.005578	0.001786
1021	-0.020025	-0.022472	-0.0212485	0.492008	0.461672	-0.000903	0.004987	0.000388	0.000227	0.000243	-0.000442	0.000515	-0.001624	0.005586	0.001704
1022	-0.019907	-0.023023	-0.021465	0.493082	0.460814	-0.000874	0.005026	0.000389	0.000216	0.000256	-0.000443	0.000512	-0.001609	0.005757	0.001584
1023	-0.019669	-0.023261	-0.021465	0.49367	0.460327	-0.000803	0.005043	0.00039	0.0002	0.000264	-0.000444	0.000498	-0.00159	0.005886	0.001461
1024	-0.019325	-0.023177	-0.021251	0.49342	0.460699	-0.000791	0.005057	0.000391	0.000187	0.000265	-0.000444	0.000476	-0.001535	0.006075	0.001322
1025	-0.018879	-0.022674	-0.0207765	0.492313	0.461958	-0.000817	0.005072	0.000392	0.000175	0.000256	-0.000439	0.000448	-0.001465	0.006244	0.001192
1026	-0.018367	-0.021719	-0.020043	0.49068	0.463959	-0.000874	0.005081	0.000395	0.000165	0.000239	-0.000431	0.000416	-0.001384	0.006389	0.001074
1027	-0.017734	-0.020331	-0.0190325	0.488185	0.466939	-0.000973	0.005083	0.000401	0.000157	0.000212	-0.000418	0.000381	-0.001288	0.006485	0.000969
1028	-0.01702	-0.018682	-0.017851	0.485263	0.470456	-0.001097	0.005074	0.00041	0.000151	0.000179	-0.0004	0.000347	-0.001183	0.006537	0.000886
1029	-0.016257	-0.016881	-0.016569	0.481747	0.474666	-0.001245	0.005051	0.000424	0.000146	0.000142	-0.000381	0.000315	-0.001087	0.00647	0.000845
1030	-0.015498	-0.015057	-0.0152775	0.478036	0.479112	-0.001412	0.005018	0.000445	0.000142	0.000107	-0.000359	0.000285	-0.001009	0.006301	0.000847
1031	-0.014873	-0.013376	-0.0141245	0.47456	0.483225	-0.001567	0.004979	0.000471	0.000136	7.8e-05	-0.000336	0.00026	-0.000958	0.006013	0.000894
1032	-0.01439	-0.011928	-0.013159	0.471132	0.487057	-0.001713	0.004941	0.0005	0.000129	5.5e-05	-0.000314	0.000239	-0.000942	0.005623	0.000977
1033	-0.014006	-0.010718	-0.012362	0.468085	0.490189	-0.001852	0.004913	0.00053	0.000122	4.1e-05	-0.000293	0.000225	-0.000954	0.005237	0.00107
1034	-0.013745	-0.009837	-0.011791	0.465773	0.492304	-0.001961	0.004884	0.000558	0.000115	3.3e-05	-0.000275	0.000216	-0.000998	0.004837	0.001166
1035	-0.013618	-0.00934	-0.011479	0.464291	0.493258	-0.002056	0.004874	0.000585	0.000106	3e-05	-0.000259	0.000213	-0.00107	0.004492	0.001251
1036	-0.013624	-0.009194	-0.011409	0.463298	0.493446	-0.002132	0.004874	0.000604	0.000101	3.2e-05	-0.000246	0.000215	-0.001169	0.004222	0.001307
1037	-0.013805	-0.009471	-0.011638	0.463919	0.491806	-0.002149	0.004867	0.000614	9.3e-05	3.8e-05	-0.000238	0.000222	-0.001298	0.004057	0.001338
1038	-0.014103	-0.010053	-0.012078	0.465178	0.489336	-0.002137	0.004888	0.000617	8.8e-05	4.6e-05	-0.000233	0.000235	-0.001446	0.004007	0.001344
1039	-0.014514	-0.011069	-0.0127915	0.46836	0.484818	-0.002046	0.004902	0.000612	7.8e-05	5.6e-05	-0.000233	0.000252	-0.001614	0.00401	0.00134
1040	-0.014874	-0.012244	-0.013559	0.47059	0.481055	-0.001981	0.004958	0.000604	7.7e-05	6.6e-05	-0.000236	0.000271	-0.001773	0.004092	0.001305
1041	-0.015363	-0.013696	-0.0145295	0.473149	0.476837	-0.001896	0.005017	0.00059	7.9e-05	8e-05	-0.000245	0.000289	-0.001918	0.004214	0.001247
1042	-0.015821	-0.015343	-0.015582	0.475448	0.472822	-0.001816	0.005091	0.000573	8.3e-05	9.6e-05	-0.000257	0.000304	-0.002018	0.004386	0.001146
1043	-0.016224	-0.017192	-0.016708	0.477605	0.468718	-0.001716	0.005171	0.000554	8.7e-05	0.000112	-0.000274	0.000315	-0.002083	0.004582	0.001017
1044	-0.016546	-0.019048	-0.017797	0.478377	0.465922	-0.001672	0.005263	0.000536	9.8e-05	0.000126	-0.000292	0.000322	-0.002088	0.004832	0.000845
1045	-0.016834	-0.020968	-0.018901	0.478608	0.463508	-0.001648	0.005344	0.000516	0.00011	0.000139	-0.000312	0.000324	-0.002046	0.005124	0.000634
1046	-0.017068	-0.022834	-0.019951	0.477997	0.461879	-0.001652	0.0054	0.000496	0.000123	0.000149	-0.000331	0.000319	-0.001967	0.005417	0.000377
1047	-0.017159	-0.0245	-0.0208295	0.476072	0.461615	-0.001704	0.005432	0.000478	0.000138	0.000154	-0.000346	0.000309	-0.001868	0.005683	9.3e-05
1048	-0.017058	-0.025851	-0.0214545	0.473489	0.462386	-0.001834	0.005447	0.000461	0.000153	0.000154	-0.000353	0.000296	-0.001729	0.005978	-0.000199
1049	-0.016832	-0.026763	-0.0217975	0.470677	0.463799	-0.001988	0.00544	0.00045	0.000164	0.000146	-0.00035	0.000278	-0.001577	0.006122	-0.000465
1050	-0.01645	-0.027075	-0.0217625	0.467235	0.466329	-0.002164	0.005419	0.000447	0.000175	0.000137	-0.000336	0.000257	-0.001425	0.006057	-0.000671
1051	-0.015991	-0.026858	-0.0214245	0.463836	0.469454	-0.002346	0.005397	0.000451	0.000183	0.000128	-0.000315	0.000235	-0.001288	0.005816	-0.000813
1052	-0.015479	-0.026004	-0.0207415	0.460181	0.473357	-0.002521	0.005373	0.000467	0.000187	0.000121	-0.000288	0.000212	-0.001162	0.00545	-0.000923
1053	-0.014888	-0.024539	-0.0197135	0.456556	0.4781	-0.002714	0.005368	0.000492	0.000191	0.000116	-0.000257	0.000192	-0.001034	0.005113	-0.001006
1054	-0.014327	-0.022598	-0.0184625	0.453355	0.482991	-0.002888	0.005375	0.000525	0.000191	0.000113	-0.000227	0.000176	-0.000913	0.004833	-0.001061
1055	-0.013879	-0.020413	-0.017146	0.451182	0.487175	-0.003032	0.005401	0.000567	0.000186	0.000117	-0.000201	0.000168	-0.000807	0.004665	-0.001116
1056	-0.013356	-0.018029	-0.0156925	0.44823	0.492401	-0.003202	0.005474	0.000609	0.000191	0.000122	-0.000177	0.000168	-0.000711	0.004619	-0.001195
1057	-0.013116	-0.015842	-0.014479	0.447349	0.495387	-0.003306	0.005547	0.000648	0.000189	0.000131	-0.000164	0.000177	-0.000638	0.004685	-0.001264
1058	-0.013065	-0.013974	-0.0135195	0.448074	0.496598	-0.003391	0.005626	0.000681	0.000188	0.000142	-0.000155	0.000195	-0.000566	0.004875	-0.001325
1059	-0.013177	-0.01236	-0.0127685	0.449656	0.496667	-0.003428	0.005681	0.000705	0.000184	0.000155	-0.000155	0.000218	-0.000525	0.00508	-0.001352
1060	-0.013471	-0.011184	-0.0123275	0.452448	0.495175	-0.003429	0.005746	0.000718	0.000184	0.000167	-0.000159	0.000245	-0.000514	0.005316	-0.001331
1061	-0.014008	-0.010565	-0.0122865	0.456748	0.491931	-0.00339	0.005798	0.000719	0.000183	0.000176	-0.000167	0.000273	-0.000543	0.005481	-0.001231
1062	-0.014691	-0.01043	-0.0125605	0.461697	0.487964	-0.003338	0.005843	0.000712	0.000184	0.000183	-0.000178	0.000298	-0.000624	0.005531	-0.001068
1063	-0.015716	-0.010874	-0.013295	0.468659	0.481924	-0.003219	0.005854	0.000695	0.000172	0.000188	-0.000192	0.000321	-0.000761	0.00544	-0.000846
1064	-0.016848	-0.011631	-0.0142395	0.474546	0.476876	-0.003122	0.005881	0.000669	0.000169	0.000189	-0.000206	0.000336	-0.000926	0.005293	-0.0006
1065	-0.018125	-0.012732	-0.0154285	0.480336	0.471995	-0.003032	0.005913	0.000638	0.000165	0.000185	-0.000223	0.000342	-0.001101	0.005125	-0.000379
1066	-0.019494	-0.014162	-0.016828	0.485712	0.4675	-0.002927	0.005944	0.000604	0.000159	0.000178	-0.000246	0.000341	-0.001274	0.004929	-0.000191
1067	-0.020896	-0.01576	-0.018328	0.49061	0.46353	-0.002837	0.005971	0.000571	0.000152	0.000172	-0.000275	0.000336	-0.001424	0.004784	-4.1e-05
1068	-0.0223	-0.017469	-0.0198845	0.494472	0.460355	-0.002763	0.005984	0.000538	0.000144	0.000166	-0.000309	0.000328	-0.001543	0.004647	6.5e-05
1069	-0.023603	-0.019106	-0.0213545	0.496158	0.459043	-0.002758	0.005997	0.000509	0.000141	0.00016	-0.000345	0.000318	-0.00162	0.004537	0.0001
1070	-0.02488	-0.020833	-0.0228565	0.498829	0.456385	-0.002699	0.005963	0.000491	0.00012	0.000162	-0.000387	0.000311	-0.001676	0.004452	0.000106
1071	-0.025792	-0.02242	-0.024106	0.499075	0.455952	-0.00274	0.00594	0.000483	0.000108	0.000163	-0.000421	0.000304	-0.001681	0.004428	3.5e-05
1072	-0.026424	-0.023887	-0.0251555	0.498607	0.455887	-0.002778	0.005891	0.000483	9.7e-05	0.000162	-0.000445	0.000294	-0.001667	0.004381	-5.2e-05
1073	-0.026758	-0.025148	-0.025953	0.497672	0.456305	-0.002855	0.005828	0.000494	8.4e-05	0.000161	-0.000458	0.000283	-0.001612	0.004423	-0.000168
1074	-0.026812	-0.026077	-0.0264445	0.496403	0.457307	-0.00295	0.005744	0.000516	7e-05	0.000157	-0.000455	0.000269	-0.001533	0.00447	-0.000291
1075	-0.026654	-0.02671	-0.026682	0.494951	0.458739	-0.003055	0.005654	0.000548	5.6e-05	0.000152	-0.000436	0.000251	-0.001428	0.004512	-0.000419
1076	-0.026274	-0.026993	-0.0266335	0.492862	0.461267	-0.003181	0.005559	0.000588	4.3e-05	0.000145	-0.000407	0.000232	-0.001314	0.004534	-0.000548
1077	-0.025747	-0.026924	-0.0263355	0.49151	0.463655	-0.003294	0.005448	0.000636	2.8e-05	0.000138	-0.00037	0.000212	-0.001199	0.004487	-0.000649
1078	-0.025135	-0.02654	-0.0258375	0.490491	0.466169	-0.003399	0.005338	0.000692	1e-05	0.000134	-0.00033	0.000194	-0.001094	0.00437	-0.000703
1079	-0.024467	-0.025864	-0.0251655	0.490111	0.468494	-0.003494	0.005246	0.000754	-1e-05	0.000133	-0.000294	0.000183	-0.001003	0.004241	-0.000708
1080	-0.023815	-0.024962	-0.0243885	0.490509	0.470249	-0.003574	0.00516	0.000819	-3e-05	0.000134	-0.000266	0.000179	-0.000933	0.004113	-0.000689
1081	-0.023125	-0.023889	-0.023507	0.49113	0.47187	-0.003642	0.005088	0.000881	-4.7e-05	0.000142	-0.000251	0.000183	-0.000893	0.004012	-0.000655
1082	-0.022519	-0.022802	-0.0226605	0.493046	0.472085	-0.003679	0.005038	0.00094	-6.5e-05	0.000153	-0.000248	0.000197	-0.000887	0.003964	-0.000607
1083	-0.021878	-0.021683	-0.0217805	0.495233	0.471833	-0.003703	0.005026	0.00099	-7.7e-05	0.000164	-0.000262	0.00022	-0.000906	0.004029	-0.000562
1084	-0.021226	-0.020634	-0.02093	0.497613	0.470905	-0.003705	0.005064	0.00103	-8.5e-05	0.000176	-0.00029	0.000255	-0.000943	0.004294	-0.000546
1085	-0.020603	-0.019661	-0.020132	0.499798	0.469625	-0.003698	0.005143	0.001058	-8.8e-05	0.00019	-0.000331	0.000298	-0.00099	0.00476	-0.000554
1086	-0.02001	-0.01877	-0.01939	0.501983	0.467732	-0.003652	0.005231	0.001069	-8.9e-05	0.000206	-0.000382	0.000346	-0.001063	0.005334	-0.000531
1087	-0.019467	-0.017976	-0.0187215	0.503265	0.466134	-0.003592	0.005346	0.001064	-8.2e-05	0.000225	-0.00044	0.000395	-0.001166	0.005936	-0.000468
1088	-0.018992	-0.017333	-0.0181625	0.504138	0.464362	-0.003502	0.005451	0.001042	-7.3e-05	0.000246	-0.000505	0.000443	-0.001299	0.006515	-0.000346
1089	-0.018546	-0.016799	-0.0176725	0.50465	0.462654	-0.003421	0.005566	0.00101	-6.2e-05	0.00027	-0.000574	0.00049	-0.001421	0.007098	-0.000204
1090	-0.018281	-0.016311	-0.017296	0.504236	0.461523	-0.003321	0.00568	0.000964	-4.4e-05	0.000289	-0.000637	0.000528	-0.001539	0.007591	-4e-05
1091	-0.018121	-0.015899	-0.01701	0.502826	0.461256	-0.003235	0.005777	0.000906	-2e-05	0.000307	-0.000692	0.000556	-0.001638	0.008026	0.000135
1092	-0.018142	-0.015595	-0.0168685	0.501081	0.461282	-0.003163	0.005851	0.000841	6e-06	0.000322	-0.000732	0.000571	-0.001713	0.008363	0.000315
1093	-0.018226	-0.015239	-0.0167325	0.497991	0.462449	-0.00314	0.005912	0.000778	3.6e-05	0.000331	-0.000754	0.000575	-0.001753	0.008638	0.000455
1094	-0.018413	-0.014968	-0.0166905	0.494362	0.464059	-0.003146	0.005944	0.00072	6.4e-05	0.000337	-0.000761	0.000571	-0.001769	0.008862	0.000548
1095	-0.018561	-0.014703	-0.016632	0.489097	0.46721	-0.003232	0.005995	0.00067	9.8e-05	0.000339	-0.000751	0.000559	-0.001744	0.009108	0.000573
1096	-0.018864	-0.014502	-0.016683	0.484374	0.469686	-0.003299	0.00602	0.000633	0.000119	0.000343	-0.000732	0.000547	-0.001715	0.009259	0.000575
1097	-0.01904	-0.014255	-0.0166475	0.478584	0.473193	-0.003408	0.006047	0.000609	0.000137	0.000355	-0.000707	0.000539	-0.001671	0.00942	0.000538
1098	-0.019229	-0.014086	-0.0166575	0.47363	0.475889	-0.003475	0.006044	0.000596	0.000142	0.00037	-0.000678	0.000536	-0.001643	0.009487	0.000495
1099	-0.019435	-0.013908	-0.0166715	0.469371	0.478139	-0.003558	0.006063	0.000606	0.00014	0.000391	-0.000651	0.000544	-0.001613	0.009631	0.000438
1100	-0.019549	-0.013659	-0.016604	0.464964	0.480809	-0.003656	0.006099	0.000635	0.000135	0.000414	-0.000624	0.00056	-0.001582	0.009776	0.000381
1101	-0.019571	-0.013251	-0.016411	0.460314	0.483879	-0.003721	0.006142	0.000676	0.000126	0.000434	-0.000602	0.000579	-0.00157	0.009809	0.000341
1102	-0.019478	-0.012779	-0.0161285	0.45713	0.48582	-0.003786	0.006194	0.000736	0.00011	0.000456	-0.000589	0.00061	-0.001553	0.009936	0.000315
1103	-0.019254	-0.012167	-0.0157105	0.454452	0.48742	-0.003842	0.006265	0.000806	9e-05	0.000477	-0.000588	0.00065	-0.001536	0.010101	0.000304
1104	-0.018916	-0.011481	-0.0151985	0.452596	0.48842	-0.003878	0.006345	0.00088	6.8e-05	0.000493	-0.0006	0.000692	-0.001513	0.010285	0.0003
1105	-0.018423	-0.010757	-0.01459	0.451498	0.488676	-0.0039	0.00644	0.000955	4.8e-05	0.000498	-0.000625	0.000735	-0.001496	0.010489	0.000313
1106	-0.017783	-0.010108	-0.0139455	0.451234	0.488076	-0.003904	0.006548	0.001022	3e-05	0.000494	-0.000663	0.000778	-0.001476	0.010739	0.000332
1107	-0.016951	-0.009464	-0.0132075	0.451462	0.486907	-0.003893	0.006672	0.001078	1.5e-05	0.000483	-0.000712	0.000823	-0.001462	0.01104	0.000358
1108	-0.015963	-0.008959	-0.012461	0.451662	0.485627	-0.003829	0.006788	0.00111	3e-06	0.00046	-0.000769	0.000857	-0.001477	0.011244	0.000401
1109	-0.014933	-0.008613	-0.011773	0.453085	0.483169	-0.003768	0.006921	0.001125	-4e-06	0.000431	-0.000831	0.000895	-0.001492	0.011643	0.000444
1110	-0.013871	-0.008454	-0.0111625	0.455332	0.479933	-0.003729	0.007092	0.001123	-5e-06	0.000402	-0.0009	0.000944	-0.00151	0.012299	0.000472
1111	-0.012718	-0.008271	-0.0104945	0.455403	0.479006	-0.00374	0.007293	0.001095	2e-05	0.000356	-0.000951	0.000979	-0.001527	0.013006	0.000481
1112	-0.011735	-0.008325	-0.01003	0.456441	0.477462	-0.003714	0.007463	0.001042	4.3e-05	0.000307	-0.000992	0.00101	-0.00155	0.01376	0.000487
1113	-0.011065	-0.008717	-0.009891	0.457746	0.476047	-0.003696	0.007609	0.000972	7.1e-05	0.000256	-0.001016	0.001034	-0.001569	0.014505	0.000487
1114	-0.010663	-0.009451	-0.010057	0.458891	0.475202	-0.003688	0.007729	0.000889	0.000103	0.000202	-0.001019	0.001047	-0.001577	0.015166	0.000482
1115	-0.010522	-0.010521	-0.0105215	0.4599	0.474805	-0.003721	0.007848	0.000803	0.000142	0.000154	-0.001004	0.001053	-0.001567	0.015751	0.000468
1116	-0.010583	-0.011855	-0.011219	0.46143	0.474142	-0.003754	0.007933	0.000717	0.000179	0.000116	-0.000975	0.001055	-0.001543	0.016215	0.000436
1117	-0.010797	-0.01345	-0.0121235	0.462685	0.473858	-0.003821	0.008001	0.000643	0.000217	9.3e-05	-0.000936	0.001052	-0.001496	0.016547	0.000381
1118	-0.011311	-0.015401	-0.013356	0.465206	0.472221	-0.003823	0.007992	0.000576	0.00024	8.7e-05	-0.000893	0.001045	-0.001444	0.016624	0.000308
1119	-0.011984	-0.017404	-0.014694	0.467194	0.471105	-0.003932	0.008006	0.000537	0.000266	0.000106	-0.000853	0.001043	-0.001363	0.016731	0.000235
1120	-0.012765	-0.019463	-0.016114	0.469736	0.46938	-0.003994	0.007956	0.000514	0.000279	0.000134	-0.000814	0.001035	-0.001291	0.01656	0.000172
1121	-0.013634	-0.021376	-0.017505	0.472523	0.467331	-0.00403	0.007871	0.000513	0.000279	0.000171	-0.000779	0.001019	-0.001233	0.016168	0.000133
1122	-0.01457	-0.023212	-0.018891	0.47664	0.464121	-0.00408	0.007752	0.000538	0.000265	0.000219	-0.000756	0.001008	-0.001191	0.015763	0.000133
1123	-0.015571	-0.024745	-0.020158	0.480735	0.461083	-0.00406	0.007578	0.000577	0.000234	0.000262	-0.000736	0.000983	-0.001192	0.015029	0.000184
1124	-0.016575	-0.025846	-0.0212105	0.484162	0.459207	-0.004066	0.007449	0.000632	0.000213	0.000291	-0.000715	0.000943	-0.001225	0.014173	0.000293
1125	-0.01754	-0.026483	-0.0220115	0.487821	0.45752	-0.004056	0.007339	0.000698	0.000188	0.000311	-0.0007	0.000894	-0.001291	0.013251	0.000472
1126	-0.018475	-0.026751	-0.022613	0.491705	0.455901	-0.00403	0.007253	0.000772	0.000162	0.000319	-0.00069	0.00084	-0.00138	0.01231	0.000708
1127	-0.01938	-0.026681	-0.0230305	0.495712	0.454362	-0.003985	0.00719	0.000844	0.000136	0.000316	-0.000687	0.000784	-0.001469	0.011389	0.000979
1128	-0.020264	-0.026255	-0.0232595	0.500014	0.452682	-0.003919	0.007159	0.000909	0.000112	0.000307	-0.000687	0.000731	-0.001565	0.010509	0.001281
1129	-0.021058	-0.025537	-0.0232975	0.504398	0.450978	-0.003838	0.007168	0.000957	9.4e-05	0.00029	-0.000688	0.000688	-0.001656	0.009737	0.00159
1130	-0.021821	-0.02468	-0.0232505	0.508914	0.449041	-0.003728	0.007194	0.000986	7.9e-05	0.000267	-0.00069	0.000654	-0.001728	0.009129	0.001849
1131	-0.02244	-0.023625	-0.0230325	0.512515	0.447754	-0.003641	0.007289	0.000998	7.9e-05	0.000233	-0.000684	0.00063	-0.001769	0.008826	0.002021
1132	-0.022951	-0.022577	-0.022764	0.516441	0.445723	-0.003496	0.007386	0.000978	8.2e-05	0.00019	-0.000674	0.000614	-0.001792	0.008705	0.002097
1133	-0.023292	-0.021584	-0.022438	0.519701	0.443878	-0.003346	0.007523	0.000933	9.8e-05	0.000135	-0.000654	0.000603	-0.001785	0.008791	0.002067
1134	-0.023447	-0.020721	-0.022084	0.522473	0.442092	-0.003181	0.007693	0.000866	0.000123	6.9e-05	-0.000623	0.000595	-0.001752	0.009076	0.001922
1135	-0.023392	-0.019902	-0.021647	0.523689	0.441239	-0.00301	0.007886	0.000779	0.000158	-9e-06	-0.000581	0.000585	-0.001694	0.009494	0.001676
1136	-0.023148	-0.019215	-0.0211815	0.523332	0.441561	-0.002878	0.008104	0.000689	0.0002	-9.2e-05	-0.000531	0.000571	-0.001615	0.010001	0.001369
1137	-0.022833	-0.018913	-0.020873	0.523951	0.440463	-0.002706	0.008282	0.000595	0.000229	-0.000167	-0.000483	0.000561	-0.001533	0.010539	0.001037
1138	-0.022393	-0.018714	-0.0205535	0.523377	0.440299	-0.002625	0.008465	0.000514	0.000258	-0.000233	-0.000435	0.00055	-0.001445	0.011032	0.000721
1139	-0.021962	-0.018767	-0.0203645	0.522099	0.440512	-0.002595	0.008626	0.000443	0.000283	-0.000283	-0.00039	0.000537	-0.001358	0.011391	0.000445
1140	-0.021481	-0.019011	-0.020246	0.520018	0.441213	-0.002622	0.008747	0.000389	0.000302	-0.000313	-0.000356	0.000526	-0.00128	0.011607	0.000246
1141	-0.020976	-0.019468	-0.020222	0.517005	0.442412	-0.002708	0.00883	0.000351	0.000314	-0.000321	-0.00033	0.000516	-0.001214	0.011679	0.000121
1142	-0.020494	-0.020146	-0.02032	0.514031	0.443129	-0.002762	0.008837	0.000328	0.000314	-0.000304	-0.000317	0.000509	-0.001177	0.011624	6.6e-05
1143	-0.020006	-0.020854	-0.02043	0.509865	0.444873	-0.002917	0.008855	0.000324	0.000314	-0.00027	-0.000313	0.000505	-0.001153	0.011513	9.3e-05
1144	-0.019595	-0.02167	-0.0206325	0.505158	0.447029	-0.003102	0.008853	0.000337	0.000313	-0.000224	-0.000317	0.000501	-0.001146	0.01128	0.000197
1145	-0.01931	-0.022533	-0.0209215	0.500433	0.449119	-0.003256	0.0088	0.000364	0.000306	-0.000168	-0.000329	0.000497	-0.001155	0.010886	0.000386
1146	-0.019032	-0.02332	-0.021176	0.495188	0.451728	-0.003411	0.008739	0.000408	0.000295	-0.000107	-0.000346	0.000494	-0.00117	0.010417	0.000648
1147	-0.01881	-0.024035	-0.0214225	0.490284	0.45414	-0.003522	0.008656	0.00046	0.000281	-4.8e-05	-0.000367	0.000489	-0.001194	0.009876	0.000949
1148	-0.018572	-0.024496	-0.021534	0.48588	0.456435	-0.003576	0.008566	0.000518	0.000263	4e-06	-0.000392	0.000483	-0.001229	0.009241	0.001281
1149	-0.018375	-0.024754	-0.0215645	0.483004	0.457676	-0.00361	0.008469	0.00058	0.00024	5.4e-05	-0.000419	0.000479	-0.001261	0.008636	0.001615
1150	-0.018062	-0.024577	-0.0213195	0.479649	0.459784	-0.003593	0.008368	0.000631	0.000225	9.1e-05	-0.000444	0.000473	-0.001298	0.008074	0.001912
1151	-0.017587	-0.023981	-0.020784	0.476686	0.461933	-0.003552	0.008283	0.000672	0.000212	0.00012	-0.000468	0.000469	-0.001334	0.007689	0.00215
1152	-0.01696	-0.023062	-0.020011	0.474332	0.463746	-0.003474	0.008219	0.000699	0.000201	0.000142	-0.000491	0.000468	-0.001378	0.007536	0.002299
1153	-0.016194	-0.021869	-0.0190315	0.472936	0.464804	-0.003359	0.008171	0.000706	0.000193	0.000157	-0.000508	0.000471	-0.001434	0.007527	0.002357
1154	-0.015201	-0.020348	-0.0177745	0.471911	0.465667	-0.003233	0.008155	0.000689	0.000191	0.000165	-0.000521	0.000478	-0.001505	0.007702	0.002301
1155	-0.014014	-0.018639	-0.0163265	0.471143	0.466441	-0.003104	0.008169	0.000651	0.000198	0.000162	-0.000524	0.000489	-0.001587	0.008049	0.002125
1156	-0.012607	-0.016833	-0.01472	0.469292	0.468418	-0.003048	0.008238	0.000599	0.000219	0.000148	-0.000515	0.000498	-0.001665	0.008584	0.001849
1157	-0.011226	-0.015198	-0.013212	0.468537	0.469365	-0.002949	0.008291	0.000532	0.000231	0.000133	-0.000504	0.000512	-0.001747	0.009246	0.00149
1158	-0.009781	-0.013626	-0.0117035	0.467349	0.47093	-0.002915	0.008374	0.000463	0.000247	0.000118	-0.000489	0.000529	-0.001806	0.010058	0.001065
1159	-0.008342	-0.012286	-0.010314	0.465766	0.473075	-0.002925	0.008454	0.000394	0.000261	0.000103	-0.000468	0.000544	-0.001844	0.010845	0.000622
1160	-0.00696	-0.011333	-0.0091465	0.464165	0.475458	-0.002945	0.008508	0.000326	0.000271	8.9e-05	-0.000448	0.000557	-0.001861	0.011555	0.000193
1161	-0.00582	-0.010516	-0.008168	0.462561	0.478063	-0.003068	0.008578	0.000271	0.000281	7.5e-05	-0.000429	0.000571	-0.001848	0.012196	-0.000183
1162	-0.004934	-0.010039	-0.0074865	0.460781	0.48093	-0.00321	0.008622	0.000224	0.000288	6.3e-05	-0.000412	0.000581	-0.001833	0.012617	-0.000498
1163	-0.004329	-0.009846	-0.0070875	0.459233	0.483623	-0.003376	0.008631	0.000186	0.00029	5.4e-05	-0.000398	0.000586	-0.001817	0.012831	-0.000706
1164	-0.004001	-0.009856	-0.0069285	0.458284	0.485675	-0.003532	0.008596	0.000156	0.000284	5.3e-05	-0.000389	0.000587	-0.001804	0.012848	-0.000814
1165	-0.003961	-0.009886	-0.0069235	0.456419	0.4885	-0.003704	0.008541	0.000136	0.000281	5.3e-05	-0.000384	0.000578	-0.001785	0.012643	-0.000808
1166	-0.004279	-0.010138	-0.0072085	0.456556	0.489206	-0.003832	0.008425	0.000125	0.000267	6.3e-05	-0.000386	0.000569	-0.001765	0.012311	-0.000661
1167	-0.004871	-0.010474	-0.0076725	0.456936	0.489418	-0.003939	0.008286	0.000124	0.000251	7.7e-05	-0.000392	0.000556	-0.00174	0.011799	-0.000379
1168	-0.005775	-0.01096	-0.0083675	0.45892	0.487881	-0.003976	0.008105	0.000125	0.000227	9.8e-05	-0.000403	0.00054	-0.001708	0.011117	-8e-06
1169	-0.006865	-0.011537	-0.009201	0.461752	0.485268	-0.003956	0.007916	0.000129	0.000199	0.000123	-0.000419	0.000523	-0.001667	0.010352	0.000402
1170	-0.008119	-0.012181	-0.01015	0.465579	0.481559	-0.003868	0.007731	0.000137	0.000168	0.000151	-0.000434	0.000503	-0.001616	0.009508	0.000824
1171	-0.009536	-0.01289	-0.011213	0.470029	0.477138	-0.003728	0.007571	0.000145	0.000136	0.000177	-0.000448	0.000484	-0.001557	0.008667	0.001205
1172	-0.011069	-0.013626	-0.0123475	0.474824	0.472247	-0.003529	0.007434	0.000148	0.000103	0.000202	-0.000459	0.000466	-0.001501	0.007886	0.001494
1173	-0.01267	-0.014416	-0.013543	0.480039	0.466874	-0.003269	0.007303	0.000144	7.1e-05	0.000223	-0.000468	0.000453	-0.001457	0.007253	0.001661
1174	-0.014202	-0.015069	-0.0146355	0.484612	0.462264	-0.003031	0.007236	0.00014	4.8e-05	0.000238	-0.000472	0.000442	-0.001416	0.006835	0.001718
1175	-0.015663	-0.015676	-0.0156695	0.488418	0.458515	-0.002798	0.007216	0.000134	3.1e-05	0.000249	-0.00047	0.000435	-0.001383	0.006648	0.001665
1176	-0.017047	-0.016326	-0.0166865	0.49302	0.454165	-0.002499	0.007174	0.000119	1.4e-05	0.000259	-0.000467	0.000433	-0.001368	0.006617	0.001528
1177	-0.018163	-0.016773	-0.017468	0.495858	0.451818	-0.002256	0.007161	0.000104	8e-06	0.000263	-0.000456	0.000429	-0.001356	0.006729	0.001338
1178	-0.019078	-0.017127	-0.0181025	0.4978	0.450477	-0.002044	0.007159	8.7e-05	8e-06	0.000265	-0.000441	0.000426	-0.00135	0.006973	0.001108
1179	-0.019702	-0.017336	-0.018519	0.498981	0.450063	-0.001868	0.007153	7e-05	1.2e-05	0.000267	-0.000421	0.000423	-0.001349	0.007283	0.000868
1180	-0.019997	-0.017445	-0.018721	0.499403	0.450496	-0.001743	0.007157	5.4e-05	2e-05	0.000267	-0.000397	0.000417	-0.001347	0.007611	0.000643
1181	-0.019991	-0.017427	-0.018709	0.498941	0.451812	-0.001665	0.007151	3.9e-05	3.4e-05	0.000265	-0.000369	0.000407	-0.001343	0.007928	0.000429
1182	-0.019745	-0.017215	-0.01848	0.497278	0.454424	-0.001688	0.007179	3e-05	5.4e-05	0.000256	-0.000337	0.000392	-0.001337	0.008189	0.000259
1183	-0.019324	-0.016969	-0.0181465	0.495238	0.457226	-0.001731	0.007201	2.3e-05	7.1e-05	0.000243	-0.000301	0.000372	-0.001339	0.008309	0.000132
1184	-0.018781	-0.016698	-0.0177395	0.492833	0.460308	-0.001814	0.007228	1.7e-05	8.6e-05	0.000229	-0.000266	0.00035	-0.00134	0.008298	3.5e-05
1185	-0.018177	-0.016463	-0.01732	0.49025	0.463456	-0.001922	0.00727	1.3e-05	9.8e-05	0.000214	-0.000231	0.000326	-0.001346	0.00812	-2.5e-05
1186	-0.017397	-0.01627	-0.0168335	0.48701	0.46717	-0.002045	0.007316	1e-05	0.00011	0.000195	-0.000197	0.000302	-0.001364	0.007825	-5e-05
1187	-0.01675	-0.016189	-0.0164695	0.484962	0.469601	-0.002142	0.007343	5e-06	0.000114	0.000182	-0.000168	0.000281	-0.001406	0.0075	1.7e-05
1188	-0.016173	-0.016235	-0.016204	0.4834	0.471354	-0.002221	0.007366	0	0.00011	0.000171	-0.000142	0.000261	-0.001465	0.007082	0.000171
1189	-0.015679	-0.016398	-0.0160385	0.482691	0.472273	-0.002265	0.007382	-7e-06	9.9e-05	0.000168	-0.00012	0.000241	-0.001522	0.006473	0.000382
1190	-0.015354	-0.01658	-0.015967	0.482468	0.47268	-0.002276	0.007386	-1.5e-05	8.5e-05	0.000169	-0.000101	0.00022	-0.00157	0.005751	0.000629
1191	-0.015044	-0.016948	-0.015996	0.4836	0.471817	-0.002198	0.007352	-2.5e-05	6.6e-05	0.000179	-8.7e-05	0.000198	-0.00161	0.004996	0.000899
1192	-0.014923	-0.017454	-0.0161885	0.485778	0.469938	-0.002058	0.007292	-3.6e-05	4.2e-05	0.000201	-7.9e-05	0.000178	-0.001668	0.004264	0.001215
1193	-0.014976	-0.01804	-0.016508	0.489026	0.467015	-0.00184	0.007202	-5e-05	1.4e-05	0.000227	-7.8e-05	0.000157	-0.0017	0.003567	0.001441
1194	-0.015116	-0.018643	-0.0168795	0.492154	0.464024	-0.001596	0.007134	-6e-05	-1.4e-05	0.000255	-8.1e-05	0.000137	-0.001691	0.002953	0.001524
1195	-0.015384	-0.019282	-0.017333	0.495554	0.46059	-0.001298	0.007054	-7.1e-05	-4.1e-05	0.000284	-8.9e-05	0.00012	-0.001663	0.002505	0.001494
1196	-0.015738	-0.019785	-0.0177615	0.498425	0.45775	-0.001056	0.007011	-7.6e-05	-6.6e-05	0.000312	-0.0001	0.000108	-0.001617	0.002248	0.001396
1197	-0.016136	-0.020353	-0.0182445	0.502046	0.454117	-0.0007	0.006894	-9e-05	-9e-05	0.000339	-0.000114	0.000102	-0.001568	0.002143	0.001225
1198	-0.016612	-0.020724	-0.018668	0.504705	0.451526	-0.00036	0.006772	-0.000105	-0.000109	0.00036	-0.000128	0.000101	-0.001507	0.002134	0.001004
1199	-0.016945	-0.021024	-0.0189845	0.505903	0.450285	-0.000151	0.006663	-0.000114	-0.000124	0.000376	-0.000143	0.000104	-0.00143	0.00221	0.000779
1200	-0.017402	-0.021302	-0.019352	0.507475	0.448515	6.8e-05	0.0065	-0.000128	-0.00014	0.000391	-0.000159	0.000116	-0.001347	0.002324	0.000542
1201	-0.017862	-0.021429	-0.0196455	0.508181	0.447461	0.000235	0.006308	-0.000144	-0.000154	0.000403	-0.000175	0.000133	-0.001262	0.002462	0.000301
1202	-0.018274	-0.021276	-0.019775	0.507622	0.447577	0.000279	0.006126	-0.000156	-0.000163	0.000408	-0.000187	0.000151	-0.001168	0.002575	6.4e-05
1203	-0.018648	-0.020922	-0.019785	0.506061	0.448587	0.000234	0.00595	-0.000165	-0.000168	0.000408	-0.000197	0.00017	-0.001076	0.00265	-0.000143
1204	-0.018889	-0.020336	-0.0196125	0.503326	0.450671	0.000102	0.005781	-0.00017	-0.00017	0.000405	-0.000203	0.000189	-0.001013	0.00281	-0.000272
1205	-0.018911	-0.019494	-0.0192025	0.499541	0.45383	-0.000108	0.005619	-0.00017	-0.000169	0.000401	-0.000207	0.000207	-0.000979	0.003033	-0.000329
1206	-0.01862	-0.018461	-0.0185405	0.494857	0.457916	-0.000374	0.005465	-0.000167	-0.000168	0.000398	-0.000209	0.000223	-0.000963	0.003217	-0.000343
1207	-0.018047	-0.017258	-0.0176525	0.488971	0.463189	-0.00068	0.00534	-0.00016	-0.000165	0.000394	-0.000207	0.000235	-0.000962	0.003364	-0.00033
1208	-0.017241	-0.015926	-0.0165835	0.482797	0.468811	-0.000969	0.005219	-0.000153	-0.000166	0.000395	-0.000202	0.000245	-0.000974	0.003412	-0.000295
1209	-0.016175	-0.014496	-0.0153355	0.47645	0.474684	-0.001227	0.005123	-0.000149	-0.00017	0.000398	-0.000193	0.00025	-0.001	0.003313	-0.000233
1210	-0.014883	-0.012983	-0.013933	0.470116	0.48068	-0.001458	0.005039	-0.000147	-0.000179	0.000405	-0.00018	0.000251	-0.001039	0.003098	-0.00015
1211	-0.013479	-0.011442	-0.0124605	0.464504	0.486115	-0.001626	0.004953	-0.000148	-0.000194	0.000417	-0.000165	0.000247	-0.001086	0.0028	-5.2e-05
1212	-0.012051	-0.009968	-0.0110095	0.460223	0.490272	-0.001707	0.00484	-0.000157	-0.000216	0.000438	-0.000151	0.000241	-0.001143	0.002464	5.3e-05
1213	-0.0106	-0.00861	-0.009605	0.45697	0.493457	-0.001714	0.0047	-0.00017	-0.00024	0.000467	-0.000138	0.000233	-0.001207	0.002134	0.000163
1214	-0.009135	-0.00741	-0.0082725	0.454056	0.496269	-0.001667	0.004533	-0.000186	-0.000262	0.000499	-0.000128	0.000222	-0.001279	0.001843	0.000283
1215	-0.00785	-0.006498	-0.007174	0.453423	0.496674	-0.001491	0.004258	-0.000209	-0.000286	0.000541	-0.000123	0.000213	-0.001364	0.00155	0.000413
1216	-0.006717	-0.005782	-0.0062495	0.453802	0.495969	-0.001236	0.00389	-0.000232	-0.000308	0.00059	-0.000124	0.000205	-0.001442	0.001241	0.00054
1217	-0.005709	-0.00524	-0.0054745	0.454975	0.494394	-0.000907	0.003452	-0.000257	-0.000327	0.000635	-0.000127	0.000196	-0.001492	0.000867	0.000625
1218	-0.004874	-0.004841	-0.0048575	0.456623	0.492199	-0.000527	0.002953	-0.000278	-0.000344	0.000673	-0.000131	0.000186	-0.001509	0.000441	0.000665
1219	-0.004308	-0.004669	-0.0044885	0.459461	0.488627	-9.1e-05	0.0024	-0.000299	-0.000359	0.000703	-0.000138	0.000177	-0.001495	-2e-05	0.000679
1220	-0.003648	-0.004503	-0.0040755	0.460384	0.486798	0.000296	0.00188	-0.00031	-0.00037	0.000714	-0.000143	0.000169	-0.001448	-0.000493	0.00068
1221	-0.003277	-0.004509	-0.003893	0.461722	0.484391	0.000661	0.001412	-0.000319	-0.000377	0.00071	-0.000147	0.000162	-0.001383	-0.000941	0.000626
1222	-0.003147	-0.004615	-0.003881	0.462341	0.482674	0.000939	0.001057	-0.000323	-0.000382	0.000694	-0.000148	0.000156	-0.001308	-0.00134	0.00055
1223	-0.00328	-0.004891	-0.0040855	0.46258	0.481448	0.001113	0.000836	-0.000326	-0.000387	0.000672	-0.000147	0.000153	-0.001234	-0.001671	0.000441
1224	-0.003601	-0.005374	-0.0044875	0.461717	0.481432	0.001157	0.000778	-0.000328	-0.000394	0.000646	-0.000143	0.000153	-0.001166	-0.001895	0.000287
1225	-0.004255	-0.005839	-0.005047	0.460649	0.481945	0.001069	0.000868	-0.000327	-0.0004	0.000616	-0.000136	0.000154	-0.001116	-0.001917	0.000139
1226	-0.005091	-0.006405	-0.005748	0.459238	0.483076	0.00087	0.001093	-0.000324	-0.000405	0.000587	-0.000127	0.000156	-0.001077	-0.001769	-1.7e-05
1227	-0.006051	-0.007087	-0.006569	0.45743	0.484786	0.000579	0.00144	-0.000319	-0.000408	0.00056	-0.000117	0.000157	-0.001043	-0.001473	-0.000204
1228	-0.007003	-0.007936	-0.0074695	0.455576	0.486707	0.000246	0.001839	-0.000309	-0.000407	0.000536	-0.000108	0.000159	-0.001007	-0.001088	-0.000396
1229	-0.007846	-0.008886	-0.008366	0.454162	0.488304	-8.4e-05	0.002259	-0.000296	-0.000403	0.00051	-9.9e-05	0.000161	-0.00097	-0.000654	-0.000601
1230	-0.00834	-0.009761	-0.0090505	0.451597	0.491084	-0.000444	0.002712	-0.000277	-0.000392	0.000479	-9.2e-05	0.000164	-0.00094	-0.000124	-0.000777
1231	-0.008885	-0.010688	-0.0097865	0.45052	0.49237	-0.000738	0.003097	-0.000261	-0.000375	0.000449	-8.9e-05	0.000168	-0.000908	0.000322	-0.00093
1232	-0.009295	-0.011835	-0.010565	0.451309	0.491627	-0.000951	0.00339	-0.000248	-0.000355	0.000424	-9.1e-05	0.000175	-0.000888	0.000715	-0.001026
1233	-0.009409	-0.01269	-0.0110495	0.450418	0.492571	-0.001124	0.003618	-0.000234	-0.000333	0.000401	-9.5e-05	0.000184	-0.000873	0.001057	-0.001057
1234	-0.009401	-0.013526	-0.0114635	0.450748	0.492264	-0.001199	0.003755	-0.000225	-0.000314	0.000384	-0.000105	0.000196	-0.000864	0.001342	-0.001075
1235	-0.009386	-0.014265	-0.0118255	0.452054	0.490979	-0.001176	0.003838	-0.000222	-0.000298	0.000371	-0.000115	0.000209	-0.00086	0.00157	-0.001082
1236	-0.009453	-0.014915	-0.012184	0.454223	0.488768	-0.001061	0.003863	-0.000225	-0.000286	0.000364	-0.000125	0.000221	-0.000854	0.001715	-0.001097
1237	-0.009626	-0.015341	-0.0124835	0.456309	0.486751	-0.000893	0.003861	-0.00023	-0.000278	0.000362	-0.000134	0.000231	-0.000841	0.001793	-0.001108
1238	-0.010034	-0.015802	-0.012918	0.460325	0.482836	-0.000602	0.003773	-0.00024	-0.000279	0.000368	-0.000142	0.000238	-0.000829	0.001727	-0.001143
1239	-0.010589	-0.016228	-0.0134085	0.464515	0.478829	-0.000255	0.003657	-0.000254	-0.000283	0.000377	-0.000148	0.000241	-0.000816	0.001583	-0.00119
1240	-0.011345	-0.016549	-0.013947	0.469216	0.474484	0.000156	0.003492	-0.000269	-0.000289	0.000391	-0.000154	0.00024	-0.000802	0.001361	-0.001249
1241	-0.012276	-0.016799	-0.0145375	0.474437	0.469876	0.000626	0.003277	-0.000283	-0.000297	0.000409	-0.000159	0.000235	-0.000785	0.00107	-0.001314
1242	-0.013398	-0.017018	-0.015208	0.479915	0.465198	0.001133	0.002998	-0.000294	-0.000306	0.00043	-0.000163	0.000227	-0.000769	0.000669	-0.00138
1243	-0.014611	-0.017118	-0.0158645	0.484711	0.461351	0.001634	0.002672	-0.0003	-0.000315	0.000453	-0.000168	0.000216	-0.000754	0.000233	-0.00144
1244	-0.015889	-0.01715	-0.0165195	0.489021	0.458025	0.002112	0.002344	-0.000301	-0.000323	0.000476	-0.000173	0.000204	-0.00074	-0.000238	-0.001512
1245	-0.017121	-0.017064	-0.0170925	0.492503	0.455509	0.002517	0.002032	-0.000299	-0.000329	0.000496	-0.00018	0.000192	-0.000726	-0.000669	-0.001595
1246	-0.01818	-0.016938	-0.017559	0.494695	0.454229	0.002766	0.001799	-0.000289	-0.000333	0.00051	-0.000185	0.00018	-0.000715	-0.000943	-0.001651
1247	-0.01915	-0.01659	-0.01787	0.49537	0.454197	0.00286	0.001675	-0.000276	-0.000336	0.000515	-0.000187	0.000165	-0.000705	-0.001128	-0.001726
1248	-0.019916	-0.016288	-0.018102	0.4964	0.453635	0.00285	0.001646	-0.000266	-0.000338	0.000516	-0.000187	0.000152	-0.000699	-0.001257	-0.001821
1249	-0.020398	-0.015904	-0.018151	0.497151	0.453389	0.002703	0.001742	-0.000256	-0.000342	0.000511	-0.000184	0.000139	-0.000701	-0.001287	-0.001882
1250	-0.020689	-0.015402	-0.0180455	0.497147	0.453809	0.002449	0.001932	-0.000247	-0.000345	0.000499	-0.000175	0.000124	-0.000715	-0.001243	-0.001905
1251	-0.020708	-0.014855	-0.0177815	0.496524	0.454779	0.002086	0.002203	-0.000238	-0.000349	0.000486	-0.000163	0.000112	-0.000744	-0.001133	-0.001844
1252	-0.020558	-0.014331	-0.0174445	0.495373	0.456226	0.001662	0.002506	-0.000228	-0.00035	0.000473	-0.000147	0.000102	-0.000781	-0.000997	-0.00173
1253	-0.02018	-0.013852	-0.017016	0.493513	0.458478	0.001215	0.002849	-0.000217	-0.000348	0.000455	-0.00013	9.4e-05	-0.000825	-0.000838	-0.001591
1254	-0.019743	-0.013464	-0.0166035	0.491884	0.460549	0.000817	0.003187	-0.000211	-0.000343	0.000433	-0.000111	8.8e-05	-0.000876	-0.00068	-0.001443
1255	-0.019204	-0.013167	-0.0161855	0.490102	0.462874	0.000474	0.003471	-0.000206	-0.000337	0.000415	-9.3e-05	8.4e-05	-0.000931	-0.000542	-0.001283
1256	-0.018751	-0.013217	-0.015984	0.49073	0.462831	0.000248	0.003685	-0.000206	-0.000331	0.0004	-7.8e-05	8.3e-05	-0.000994	-0.000387	-0.001108
1257	-0.018023	-0.01295	-0.0154865	0.487523	0.466497	5.1e-05	0.003893	-0.000208	-0.000321	0.000382	-6.4e-05	8.2e-05	-0.001051	-0.000223	-0.000971
1258	-0.017326	-0.013024	-0.015175	0.486162	0.468248	-5.7e-05	0.004078	-0.000214	-0.000312	0.000367	-5.4e-05	8.3e-05	-0.001112	-1.1e-05	-0.000819
1259	-0.016694	-0.013152	-0.014923	0.485054	0.469561	-7.5e-05	0.004216	-0.000228	-0.000305	0.000355	-4.9e-05	8.6e-05	-0.001168	0.00023	-0.000704
1260	-0.016186	-0.013344	-0.014765	0.484552	0.470088	-1.4e-05	0.004309	-0.000245	-0.000301	0.00035	-4.9e-05	9.2e-05	-0.001207	0.000466	-0.000623
1261	-0.015757	-0.013547	-0.014652	0.484459	0.469935	0.0001	0.004349	-0.000266	-0.000298	0.00035	-5.4e-05	0.000102	-0.001235	0.00074	-0.000569
1262	-0.015408	-0.013647	-0.0145275	0.484273	0.469502	0.00025	0.004361	-0.00029	-0.000297	0.000355	-6.4e-05	0.000115	-0.001261	0.001074	-0.000527
1263	-0.015139	-0.013629	-0.014384	0.484092	0.468813	0.000431	0.004317	-0.000313	-0.000299	0.000369	-8.1e-05	0.000134	-0.001279	0.001459	-0.000474
1264	-0.014893	-0.013506	-0.0141995	0.483189	0.468676	0.000595	0.004241	-0.000332	-0.000304	0.00039	-0.000101	0.000154	-0.001271	0.001804	-0.000427
1265	-0.014851	-0.013485	-0.014168	0.483025	0.467653	0.000819	0.004057	-0.00035	-0.000313	0.000421	-0.000127	0.000178	-0.001237	0.002043	-0.000389
1266	-0.014925	-0.013441	-0.014183	0.482856	0.466613	0.001055	0.003768	-0.000361	-0.000327	0.000461	-0.000155	0.000201	-0.001186	0.002186	-0.000314
1267	-0.015052	-0.01337	-0.014211	0.482332	0.465908	0.001279	0.003389	-0.000361	-0.000345	0.000511	-0.000185	0.000224	-0.001126	0.00225	-0.00019
1268	-0.01526	-0.013325	-0.0142925	0.481363	0.465744	0.00146	0.002938	-0.000352	-0.000365	0.000567	-0.000214	0.000246	-0.001064	0.002216	-3e-06
1269	-0.015549	-0.01336	-0.0144545	0.479985	0.466153	0.001577	0.002443	-0.000335	-0.000386	0.000623	-0.00024	0.000265	-0.001002	0.00209	0.00023
1270	-0.015861	-0.013537	-0.014699	0.478587	0.466764	0.001665	0.001873	-0.000313	-0.000407	0.000683	-0.000263	0.000282	-0.000947	0.00186	0.000496
1271	-0.016162	-0.013599	-0.0148805	0.475683	0.468989	0.001617	0.00131	-0.000284	-0.000423	0.000739	-0.000279	0.0003	-0.00091	0.001705	0.000823
1272	-0.016522	-0.013661	-0.0150915	0.472407	0.471696	0.001496	0.000782	-0.000259	-0.000434	0.000791	-0.00029	0.000316	-0.00089	0.00162	0.00114
1273	-0.016777	-0.013599	-0.015188	0.468535	0.47515	0.001303	0.000341	-0.000238	-0.000441	0.00084	-0.000294	0.00033	-0.000894	0.001535	0.001429
1274	-0.016861	-0.013432	-0.0151465	0.464861	0.478526	0.001075	-2.2e-05	-0.000226	-0.000444	0.000884	-0.000293	0.00034	-0.000919	0.001395	0.001656
1275	-0.016702	-0.01306	-0.014881	0.460405	0.483008	0.000789	-0.000234	-0.000221	-0.000441	0.000916	-0.000285	0.000348	-0.000964	0.001335	0.001823
1276	-0.016374	-0.012453	-0.0144135	0.455545	0.488048	0.000478	-0.00032	-0.000218	-0.000438	0.000942	-0.000273	0.00035	-0.001031	0.001257	0.001938
1277	-0.015813	-0.011871	-0.013842	0.451436	0.492573	0.00016	-0.000234	-0.00022	-0.000434	0.00096	-0.000258	0.000348	-0.001122	0.001237	0.002004
1278	-0.015149	-0.011257	-0.013203	0.448209	0.496376	-0.000144	-2e-06	-0.000226	-0.000428	0.000967	-0.000238	0.000342	-0.001234	0.00123	0.00204
1279	-0.014246	-0.010636	-0.012441	0.446133	0.499343	-0.000418	0.000347	-0.000233	-0.000422	0.000965	-0.000218	0.000332	-0.001366	0.001232	0.00204
1280	-0.013225	-0.010075	-0.01165	0.44522	0.501286	-0.000639	0.00078	-0.000243	-0.000416	0.000956	-0.000199	0.000322	-0.001513	0.001277	0.002011
1281	-0.01209	-0.009511	-0.0108005	0.445198	0.502328	-0.000806	0.001258	-0.000254	-0.000411	0.00094	-0.000184	0.000312	-0.001659	0.001348	0.001961
1282	-0.010941	-0.008992	-0.0099665	0.446337	0.502154	-0.000905	0.001737	-0.000269	-0.000405	0.000917	-0.000171	0.000303	-0.001788	0.001379	0.001873
1283	-0.009794	-0.008276	-0.009035	0.447529	0.501762	-0.000954	0.00223	-0.000287	-0.0004	0.00089	-0.000159	0.000293	-0.001894	0.001385	0.001792
1284	-0.008679	-0.007722	-0.0082005	0.449986	0.499897	-0.000912	0.002664	-0.000307	-0.0004	0.000865	-0.00015	0.000282	-0.001967	0.001339	0.00171
1285	-0.007903	-0.007325	-0.007614	0.454204	0.496013	-0.000772	0.003021	-0.000331	-0.000402	0.000843	-0.000145	0.000271	-0.002005	0.001276	0.00161
1286	-0.007271	-0.006936	-0.0071035	0.457697	0.492613	-0.000619	0.003364	-0.000352	-0.000405	0.000819	-0.000144	0.000264	-0.002003	0.001234	0.00151
1287	-0.006872	-0.00669	-0.006781	0.461319	0.488922	-0.000432	0.003639	-0.000368	-0.000411	0.000796	-0.000147	0.00026	-0.001977	0.001207	0.00142
1288	-0.006752	-0.006611	-0.0066815	0.464934	0.485156	-0.000231	0.003865	-0.000377	-0.00042	0.000773	-0.000155	0.00026	-0.001924	0.001207	0.001333
1289	-0.006945	-0.006644	-0.0067945	0.468248	0.481726	-3.5e-05	0.004049	-0.000377	-0.000428	0.000752	-0.00017	0.000263	-0.00185	0.001271	0.001254
1290	-0.00739	-0.00684	-0.007115	0.470258	0.479658	8.9e-05	0.00421	-0.000362	-0.000432	0.000729	-0.000189	0.000269	-0.00174	0.001377	0.001148
1291	-0.008297	-0.007349	-0.007823	0.472437	0.477517	0.000216	0.004321	-0.000338	-0.000432	0.000711	-0.000214	0.000278	-0.001593	0.001426	0.000958
1292	-0.009407	-0.008169	-0.008788	0.474218	0.475884	0.00032	0.004391	-0.000309	-0.000426	0.000702	-0.000244	0.000288	-0.001434	0.001488	0.000743
1293	-0.010815	-0.00903	-0.0099225	0.474374	0.476232	0.000257	0.004478	-0.000265	-0.00041	0.000694	-0.000279	0.000301	-0.001298	0.001876	0.000616
1294	-0.012496	-0.010089	-0.0112925	0.47443	0.476643	0.000182	0.004534	-0.000223	-0.000388	0.000695	-0.000313	0.000313	-0.001174	0.002393	0.000497
1295	-0.014223	-0.011119	-0.012671	0.473776	0.477689	3.6e-05	0.004595	-0.000183	-0.000358	0.000693	-0.000342	0.000321	-0.001063	0.003018	0.000394
1296	-0.015862	-0.012035	-0.0139485	0.472432	0.479249	-0.00021	0.004701	-0.000148	-0.000322	0.000679	-0.000359	0.000322	-0.000964	0.003669	0.000288
1297	-0.017282	-0.012783	-0.0150325	0.470947	0.480872	-0.000514	0.004835	-0.000122	-0.000283	0.000654	-0.000363	0.000315	-0.00088	0.004212	0.000167
1298	-0.018488	-0.013471	-0.0159795	0.469664	0.482138	-0.000833	0.004997	-0.000107	-0.000244	0.000617	-0.000352	0.000301	-0.000813	0.004637	5.7e-05
1299	-0.019418	-0.014074	-0.016746	0.468704	0.48304	-0.00114	0.005179	-0.0001	-0.000208	0.000571	-0.000329	0.000283	-0.000769	0.004922	-2.1e-05
1300	-0.020077	-0.014546	-0.0173115	0.468069	0.483782	-0.001435	0.005408	-9.4e-05	-0.000176	0.000518	-0.000298	0.000263	-0.000747	0.005071	-6e-05
1301	-0.020475	-0.015119	-0.017797	0.468843	0.48325	-0.001634	0.005622	-9.6e-05	-0.00015	0.000464	-0.000265	0.000244	-0.00075	0.005055	-7.4e-05
1302	-0.020644	-0.015655	-0.0181495	0.470569	0.481983	-0.001741	0.005837	-0.0001	-0.000129	0.000412	-0.000231	0.000227	-0.000773	0.004927	-5.6e-05
1303	-0.020611	-0.016151	-0.018381	0.472946	0.480214	-0.001762	0.006029	-0.000104	-0.000114	0.000366	-0.000201	0.000213	-0.000815	0.004673	-4e-06
1304	-0.020401	-0.016644	-0.0185225	0.476041	0.478012	-0.001695	0.006199	-0.000108	-0.000105	0.000329	-0.000173	0.000201	-0.000874	0.004278	7.3e-05
1305	-0.020118	-0.017175	-0.0186465	0.47944	0.475688	-0.00154	0.006372	-0.000111	-0.000101	0.000299	-0.000149	0.00019	-0.000944	0.003837	0.000152
1306	-0.01982	-0.017785	-0.0188025	0.483187	0.473133	-0.001325	0.006559	-0.000112	-0.000102	0.000275	-0.000127	0.000179	-0.001023	0.003449	0.000246
1307	-0.019559	-0.018425	-0.018992	0.486964	0.470644	-0.001056	0.006719	-0.000113	-0.000107	0.000259	-0.000113	0.000172	-0.001107	0.003117	0.000342
1308	-0.01925	-0.019046	-0.019148	0.490458	0.46849	-0.000774	0.006844	-0.000113	-0.000116	0.000252	-0.000104	0.000168	-0.001192	0.002847	0.000441
1309	-0.018964	-0.019661	-0.0193125	0.493671	0.46654	-0.000479	0.006937	-0.000116	-0.000127	0.000251	-0.000102	0.000167	-0.001272	0.002704	0.000525
1310	-0.018666	-0.020202	-0.019434	0.495527	0.465556	-0.000152	0.006985	-0.000125	-0.000135	0.000253	-0.000104	0.000168	-0.001341	0.002652	0.000564
1311	-0.018498	-0.020723	-0.0196105	0.497917	0.463909	0.000115	0.007014	-0.000133	-0.000142	0.00026	-0.000114	0.000176	-0.001387	0.002738	0.00058
1312	-0.018428	-0.021061	-0.0197445	0.4991	0.463217	0.000297	0.007036	-0.000142	-0.000143	0.000268	-0.000129	0.000186	-0.001409	0.00295	0.00056
1313	-0.018477	-0.021201	-0.019839	0.499483	0.462914	0.000419	0.007025	-0.000152	-0.000141	0.000279	-0.000149	0.000198	-0.001417	0.003335	0.000512
1314	-0.018691	-0.02122	-0.0199555	0.498912	0.463216	0.000456	0.007002	-0.000156	-0.000133	0.000292	-0.000173	0.000212	-0.001413	0.003903	0.000451
1315	-0.019083	-0.021099	-0.020091	0.49701	0.464532	0.000352	0.006985	-0.000149	-0.000121	0.000303	-0.000198	0.000225	-0.001396	0.004624	0.000393
1316	-0.019776	-0.020942	-0.020359	0.494805	0.465864	0.000226	0.00693	-0.00014	-0.000109	0.000317	-0.000223	0.000237	-0.00137	0.005356	0.000311
1317	-0.020657	-0.020719	-0.020688	0.491689	0.467928	1e-06	0.006871	-0.000124	-9.8e-05	0.000329	-0.000248	0.000247	-0.001329	0.006086	0.00021
1318	-0.021589	-0.020442	-0.0210155	0.488269	0.470228	-0.000264	0.00678	-0.000106	-9.4e-05	0.000342	-0.000268	0.000255	-0.001291	0.00669	0.000147
1319	-0.022443	-0.020221	-0.021332	0.484791	0.472619	-0.000558	0.006665	-8.8e-05	-9.4e-05	0.000351	-0.000284	0.00026	-0.001254	0.007202	0.000116
1320	-0.023135	-0.02008	-0.0216075	0.481658	0.474821	-0.000894	0.006536	-7.2e-05	-0.0001	0.000358	-0.000295	0.000265	-0.001229	0.007651	0.00016
1321	-0.023736	-0.019969	-0.0218525	0.478758	0.476903	-0.001165	0.006365	-6.9e-05	-0.000107	0.00036	-0.0003	0.000268	-0.001212	0.007998	0.00024
1322	-0.023979	-0.019894	-0.0219365	0.475777	0.479182	-0.001415	0.006204	-7.5e-05	-0.000114	0.000357	-0.000299	0.000269	-0.001203	0.008211	0.00037
1323	-0.023996	-0.019869	-0.0219325	0.47359	0.480932	-0.00159	0.006043	-8.9e-05	-0.00012	0.000352	-0.000295	0.000271	-0.001205	0.008277	0.000531
1324	-0.02377	-0.01991	-0.02184	0.472214	0.482132	-0.00169	0.00589	-0.000111	-0.000126	0.000346	-0.00029	0.000274	-0.001216	0.008253	0.000692
1325	-0.023312	-0.020017	-0.0216645	0.471924	0.482539	-0.001709	0.005753	-0.000138	-0.000131	0.000339	-0.000286	0.00028	-0.001241	0.008153	0.000841
1326	-0.022652	-0.020241	-0.0214465	0.473371	0.481396	-0.001619	0.00562	-0.00017	-0.000137	0.000336	-0.000285	0.00029	-0.001282	0.007991	0.000954
1327	-0.021849	-0.020348	-0.0210985	0.475469	0.479903	-0.001505	0.005558	-0.000198	-0.000141	0.000334	-0.000288	0.000305	-0.00133	0.007891	0.001019
1328	-0.020848	-0.020371	-0.0206095	0.478396	0.477784	-0.001348	0.005529	-0.000224	-0.000148	0.000334	-0.000296	0.000326	-0.001391	0.007916	0.001031
1329	-0.019696	-0.020255	-0.0199755	0.481491	0.47546	-0.001162	0.005541	-0.00025	-0.000156	0.000337	-0.00031	0.000353	-0.001461	0.008069	0.000982
1330	-0.018456	-0.019997	-0.0192265	0.485247	0.472442	-0.000978	0.005574	-0.00027	-0.000168	0.000344	-0.00033	0.000386	-0.001534	0.008373	0.000883
1331	-0.017083	-0.019494	-0.0182885	0.488232	0.469961	-0.000796	0.005609	-0.000286	-0.000183	0.000354	-0.000353	0.000422	-0.001613	0.008751	0.000747
1332	-0.015669	-0.018804	-0.0172365	0.490711	0.467642	-0.000642	0.005646	-0.000297	-0.000199	0.000366	-0.000379	0.000462	-0.001682	0.009228	0.000585
1333	-0.014233	-0.017903	-0.016068	0.492004	0.465998	-0.000534	0.005655	-0.000298	-0.000217	0.000383	-0.000408	0.000504	-0.001735	0.009798	0.000413
1334	-0.012741	-0.01678	-0.0147605	0.49218	0.465002	-0.000454	0.005629	-0.000292	-0.000235	0.000405	-0.000435	0.000544	-0.00177	0.010418	0.000249
1335	-0.011322	-0.015561	-0.0134415	0.490959	0.464907	-0.000421	0.005583	-0.000276	-0.000249	0.000423	-0.000458	0.000581	-0.001787	0.011061	0.000103
1336	-0.010044	-0.014357	-0.0122005	0.48847	0.465765	-0.000397	0.005507	-0.000258	-0.000257	0.000434	-0.000475	0.00061	-0.001787	0.011606	-4.4e-05
1337	-0.009081	-0.013181	-0.011131	0.485011	0.467655	-0.00047	0.005462	-0.000227	-0.000259	0.000438	-0.00049	0.000639	-0.001764	0.012205	-0.000136
1338	-0.008528	-0.012127	-0.0103275	0.480943	0.470278	-0.000601	0.005439	-0.000194	-0.000253	0.000431	-0.000504	0.000665	-0.001723	0.01286	-0.000201
1339	-0.008366	-0.011188	-0.009777	0.475771	0.474267	-0.000804	0.005459	-0.00016	-0.000237	0.000416	-0.000514	0.000683	-0.001669	0.013511	-0.000261
1340	-0.008713	-0.01041	-0.0095615	0.469948	0.479038	-0.001063	0.005546	-0.000128	-0.000214	0.000396	-0.00052	0.000693	-0.001601	0.014103	-0.000336
1341	-0.009543	-0.009842	-0.0096925	0.463749	0.484266	-0.001362	0.005687	-0.0001	-0.000185	0.000375	-0.000521	0.000693	-0.001525	0.014597	-0.000425
1342	-0.010816	-0.009543	-0.0101795	0.457421	0.489566	-0.001696	0.005888	-7.5e-05	-0.000154	0.000356	-0.000516	0.000681	-0.001448	0.014936	-0.000516
1343	-0.012404	-0.00948	-0.010942	0.451306	0.494439	-0.002035	0.006135	-5.2e-05	-0.000123	0.00034	-0.000507	0.000661	-0.001375	0.015105	-0.000593
1344	-0.014307	-0.009726	-0.0120165	0.446658	0.497452	-0.002313	0.006367	-3.6e-05	-9.9e-05	0.00033	-0.000496	0.000636	-0.001316	0.015051	-0.000636
1345	-0.016284	-0.010118	-0.013201	0.441999	0.500069	-0.002568	0.006604	-2.1e-05	-7.4e-05	0.000315	-0.000479	0.000604	-0.001259	0.014866	-0.00065
1346	-0.018398	-0.01065	-0.014524	0.43813	0.501707	-0.002801	0.006838	-5e-06	-5.1e-05	0.000297	-0.000459	0.00057	-0.0012	0.014598	-0.000635
1347	-0.020419	-0.011509	-0.015964	0.436194	0.501416	-0.002914	0.006991	8e-06	-3.2e-05	0.000276	-0.000441	0.000535	-0.001148	0.014161	-0.000604
1348	-0.022246	-0.012618	-0.017432	0.436345	0.49934	-0.002931	0.007094	2.3e-05	-1.8e-05	0.000251	-0.000426	0.0005	-0.001103	0.013579	-0.000521
1349	-0.02365	-0.013854	-0.018752	0.437631	0.496713	-0.00286	0.007145	3.8e-05	-7e-06	0.000225	-0.000416	0.00047	-0.00107	0.012977	-0.000398
1350	-0.024555	-0.015283	-0.019919	0.440801	0.493011	-0.002706	0.007137	5.3e-05	1e-06	0.000196	-0.000411	0.000448	-0.001052	0.012351	-0.000236
1351	-0.024966	-0.016682	-0.020824	0.444641	0.489517	-0.002534	0.007125	7.1e-05	1.4e-05	0.000164	-0.000409	0.000431	-0.001045	0.011786	-7.5e-05
1352	-0.024974	-0.018248	-0.021611	0.450321	0.484728	-0.002271	0.007066	8e-05	2.3e-05	0.000135	-0.000413	0.000424	-0.001062	0.011319	5.8e-05
1353	-0.024633	-0.019878	-0.0222555	0.456714	0.479635	-0.001972	0.007011	8.4e-05	3.4e-05	0.000105	-0.000417	0.000424	-0.001104	0.010963	0.000154
1354	-0.024114	-0.021584	-0.022849	0.463493	0.474289	-0.001648	0.006971	8.3e-05	4.9e-05	7.3e-05	-0.00042	0.00043	-0.001167	0.010805	0.000183
1355	-0.023418	-0.023154	-0.023286	0.469895	0.469502	-0.001349	0.006975	7.8e-05	6.9e-05	4.2e-05	-0.000417	0.000441	-0.001249	0.010828	0.000164
1356	-0.022741	-0.024518	-0.0236295	0.475987	0.465107	-0.001071	0.00702	7e-05	9.2e-05	9e-06	-0.00041	0.000454	-0.001339	0.010992	9.6e-05
1357	-0.022149	-0.025738	-0.0239435	0.481238	0.46141	-0.000826	0.0071	6e-05	0.00012	-2.4e-05	-0.000398	0.000467	-0.001425	0.011339	-4.3e-05
1358	-0.021659	-0.026682	-0.0241705	0.48592	0.458356	-0.00065	0.007222	5.5e-05	0.000148	-5.4e-05	-0.000388	0.000482	-0.001494	0.011879	-0.000245
1359	-0.021189	-0.027269	-0.024229	0.489828	0.456219	-0.000573	0.007385	5.6e-05	0.000177	-7.7e-05	-0.00038	0.000497	-0.001535	0.012559	-0.000498
1360	-0.020692	-0.027454	-0.024073	0.492246	0.455788	-0.000636	0.007601	6.4e-05	0.000208	-9.2e-05	-0.000374	0.000511	-0.00154	0.013347	-0.000803
1361	-0.020182	-0.027219	-0.0237005	0.493939	0.456172	-0.000771	0.007827	7.6e-05	0.000233	-8.7e-05	-0.000376	0.000525	-0.001525	0.014179	-0.001132
1362	-0.019625	-0.026612	-0.0231185	0.494785	0.457558	-0.00098	0.00805	9.5e-05	0.000252	-6.8e-05	-0.000383	0.000537	-0.001497	0.014981	-0.001462
1363	-0.019058	-0.025686	-0.022372	0.494867	0.459785	-0.001224	0.008223	0.000117	0.000264	-3.6e-05	-0.000395	0.000548	-0.001469	0.015714	-0.001774
1364	-0.01849	-0.024599	-0.0215445	0.494438	0.462569	-0.001475	0.008319	0.000144	0.00027	2e-06	-0.000411	0.000559	-0.001452	0.016303	-0.002029
1365	-0.017933	-0.023441	-0.020687	0.493301	0.465804	-0.001689	0.00831	0.00017	0.000271	3.8e-05	-0.000427	0.000569	-0.001448	0.016653	-0.002193
1366	-0.017527	-0.022382	-0.0199545	0.492813	0.468102	-0.001784	0.008162	0.000197	0.000261	7.4e-05	-0.000447	0.000578	-0.001445	0.016729	-0.002227
1367	-0.017194	-0.021276	-0.019235	0.490658	0.471892	-0.001928	0.007973	0.000231	0.000257	9.8e-05	-0.000464	0.000583	-0.001424	0.016557	-0.002096
1368	-0.017034	-0.020358	-0.018696	0.488505	0.475277	-0.002005	0.007704	0.000266	0.000249	0.000118	-0.000484	0.000586	-0.001393	0.016213	-0.001847
1369	-0.017074	-0.019655	-0.0183645	0.486379	0.478195	-0.002025	0.007393	0.000303	0.00024	0.000131	-0.000507	0.000587	-0.001349	0.015759	-0.001531
1370	-0.017416	-0.01922	-0.018318	0.484601	0.480269	-0.00197	0.007046	0.000338	0.00023	0.000139	-0.000531	0.000587	-0.001304	0.015257	-0.001185
1371	-0.017988	-0.019014	-0.018501	0.48281	0.481961	-0.001877	0.006689	0.000367	0.000225	0.000141	-0.000555	0.000587	-0.001262	0.01479	-0.000853
1372	-0.018868	-0.019077	-0.0189725	0.481953	0.482482	-0.001764	0.006369	0.000388	0.000223	0.000139	-0.000577	0.000588	-0.001224	0.014403	-0.000576
1373	-0.019938	-0.019359	-0.0196485	0.481731	0.482139	-0.001624	0.00611	0.000396	0.000224	0.000133	-0.000595	0.000588	-0.001204	0.014099	-0.000382
1374	-0.021084	-0.019816	-0.02045	0.48221	0.481054	-0.001468	0.005919	0.000393	0.000229	0.000123	-0.000607	0.000591	-0.001204	0.013906	-0.000268
1375	-0.022288	-0.020484	-0.021386	0.484368	0.478232	-0.001232	0.005782	0.000374	0.000233	0.000114	-0.000618	0.000601	-0.00124	0.013838	-0.000234
1376	-0.023338	-0.02109	-0.022214	0.485985	0.47601	-0.001054	0.005775	0.000349	0.000248	0.000102	-0.000615	0.00061	-0.001291	0.013925	-0.000256
1377	-0.024167	-0.021668	-0.0229175	0.488074	0.473503	-0.000875	0.00586	0.000316	0.000263	9.3e-05	-0.000603	0.00062	-0.001357	0.014054	-0.000318
1378	-0.024741	-0.022069	-0.023405	0.48977	0.471385	-0.000702	0.006021	0.000278	0.000278	8.3e-05	-0.000584	0.00063	-0.001437	0.014207	-0.000422
1379	-0.025079	-0.022424	-0.0237515	0.491909	0.468833	-0.000548	0.006261	0.000244	0.00029	7.4e-05	-0.00056	0.000644	-0.001524	0.014454	-0.000561
1380	-0.025172	-0.02257	-0.023871	0.493377	0.466811	-0.000446	0.006558	0.000218	0.000299	6.6e-05	-0.000534	0.000658	-0.001608	0.014846	-0.000766
1381	-0.025006	-0.022557	-0.0237815	0.494054	0.465473	-0.000416	0.006892	0.0002	0.000304	6.2e-05	-0.000507	0.000672	-0.001673	0.015363	-0.001
1382	-0.024549	-0.02233	-0.0234395	0.493663	0.465049	-0.000473	0.007216	0.000188	0.000304	6.2e-05	-0.000483	0.000685	-0.001729	0.015919	-0.001234
1383	-0.023837	-0.021932	-0.0228845	0.491867	0.465934	-0.000652	0.007505	0.000182	0.000302	6.2e-05	-0.000466	0.000695	-0.001769	0.016424	-0.001453
1384	-0.022943	-0.021464	-0.0222035	0.489128	0.467651	-0.000916	0.007739	0.000179	0.000297	6.8e-05	-0.000458	0.000705	-0.001792	0.016905	-0.001655
1385	-0.021746	-0.020874	-0.02131	0.484569	0.471144	-0.001282	0.007919	0.000179	0.000293	7.1e-05	-0.00046	0.00071	-0.001788	0.017362	-0.001816
1386	-0.020582	-0.020266	-0.020424	0.480494	0.47419	-0.001592	0.008001	0.00018	0.00028	7.9e-05	-0.000475	0.000714	-0.001769	0.017721	-0.001921
1387	-0.019335	-0.019525	-0.01943	0.476242	0.477574	-0.001893	0.008019	0.000186	0.000263	8.8e-05	-0.000502	0.000718	-0.001727	0.018014	-0.001948
1388	-0.017996	-0.01863	-0.018313	0.471556	0.48161	-0.002166	0.007983	0.000198	0.000248	9.3e-05	-0.00054	0.000723	-0.001665	0.018247	-0.001892
1389	-0.016554	-0.017553	-0.0170535	0.466531	0.486067	-0.002335	0.007864	0.000212	0.000233	9.4e-05	-0.000589	0.000731	-0.00161	0.018359	-0.001752
1390	-0.015057	-0.016262	-0.0156595	0.460492	0.491905	-0.002474	0.007706	0.000237	0.000228	9.2e-05	-0.000643	0.000744	-0.001545	0.01842	-0.001521
1391	-0.013686	-0.015026	-0.014356	0.45589	0.496473	-0.002494	0.007473	0.000269	0.000216	0.000108	-0.00071	0.000769	-0.001491	0.018498	-0.001235
1392	-0.012608	-0.013924	-0.013266	0.452485	0.49991	-0.002353	0.007159	0.000301	0.000198	0.000135	-0.000783	0.0008	-0.001473	0.018522	-0.000958
1393	-0.011658	-0.012757	-0.0122075	0.447987	0.504611	-0.002191	0.00684	0.000338	0.000191	0.000167	-0.000848	0.000829	-0.001476	0.01848	-0.000677
1394	-0.010943	-0.011827	-0.011385	0.445235	0.507571	-0.002024	0.006505	0.000376	0.000184	0.000212	-0.00091	0.000867	-0.001495	0.018494	-0.000372
1395	-0.010624	-0.011207	-0.0109155	0.444048	0.50875	-0.001801	0.006176	0.000404	0.000177	0.000264	-0.000956	0.000904	-0.001541	0.018489	-8.7e-05
1396	-0.010643	-0.010961	-0.010802	0.445146	0.507395	-0.001481	0.005848	0.000414	0.000165	0.000318	-0.000989	0.000938	-0.001618	0.018474	0.000168
1397	-0.011017	-0.01095	-0.0109835	0.446653	0.505442	-0.001224	0.005617	0.000419	0.000166	0.000363	-0.001001	0.000966	-0.00169	0.018499	0.00041
1398	-0.01158	-0.011316	-0.011448	0.448601	0.502822	-0.001014	0.005464	0.000417	0.000177	0.000395	-0.000991	0.000985	-0.001759	0.018531	0.000643
1399	-0.012408	-0.012192	-0.0123	0.451564	0.498852	-0.000735	0.005349	0.000403	0.000186	0.000415	-0.000965	0.000994	-0.001841	0.018425	0.000862
1400	-0.013597	-0.013521	-0.013559	0.455022	0.494273	-0.000488	0.005316	0.000385	0.000197	0.000425	-0.000926	0.000993	-0.001906	0.018288	0.001039
1401	-0.014848	-0.015155	-0.0150015	0.458116	0.489951	-0.00026	0.005339	0.000365	0.000209	0.000423	-0.000877	0.000984	-0.001959	0.018092	0.001184
1402	-0.01618	-0.017026	-0.016603	0.46134	0.485548	-3.3e-05	0.005402	0.000346	0.000215	0.000414	-0.000827	0.00097	-0.001997	0.01786	0.001298
1403	-0.017452	-0.018986	-0.018219	0.463944	0.481995	0.000136	0.005515	0.00033	0.000218	0.000398	-0.000778	0.000947	-0.002013	0.017612	0.001369
1404	-0.0187	-0.020932	-0.019816	0.466941	0.478375	0.000308	0.00564	0.000318	0.000211	0.000378	-0.000738	0.00092	-0.002015	0.017332	0.001415
1405	-0.019656	-0.022751	-0.0212035	0.46855	0.476648	0.000382	0.005782	0.000311	0.000205	0.000348	-0.000703	0.000883	-0.001993	0.016991	0.001429
1406	-0.020344	-0.02435	-0.022347	0.470025	0.475666	0.000398	0.005931	0.00031	0.000194	0.000311	-0.000674	0.000843	-0.001948	0.01664	0.001413
1407	-0.020832	-0.025682	-0.023257	0.471349	0.475304	0.000348	0.006078	0.000312	0.000178	0.00027	-0.000655	0.0008	-0.001884	0.016292	0.001376
1408	-0.021108	-0.026745	-0.0239265	0.47248	0.475572	0.000231	0.006205	0.000316	0.000163	0.000227	-0.000645	0.000758	-0.001799	0.015946	0.001338
1409	-0.021214	-0.027447	-0.0243305	0.473352	0.476414	7.7e-05	0.006305	0.00032	0.000148	0.000185	-0.000642	0.000715	-0.001706	0.015556	0.001311
1410	-0.02121	-0.027834	-0.024522	0.474456	0.477294	-7.7e-05	0.006376	0.000323	0.000133	0.000149	-0.000644	0.000678	-0.001613	0.015191	0.001284
1411	-0.021201	-0.027948	-0.0245745	0.476066	0.477952	-0.000256	0.006429	0.000329	0.000119	0.000122	-0.000648	0.000646	-0.00151	0.014879	0.001256
1412	-0.02121	-0.02778	-0.024495	0.477798	0.478636	-0.00042	0.006438	0.000336	0.000109	0.0001	-0.000646	0.000615	-0.001417	0.014563	0.001246
1413	-0.021211	-0.027315	-0.024263	0.478904	0.480067	-0.000593	0.006421	0.000346	0.000106	8.3e-05	-0.000636	0.000582	-0.001329	0.014229	0.001247
1414	-0.021465	-0.026742	-0.0241035	0.481944	0.479659	-0.000679	0.00635	0.000358	9.8e-05	7.6e-05	-0.000621	0.000554	-0.001258	0.013906	0.001257
1415	-0.021835	-0.026042	-0.0239385	0.484819	0.47961	-0.000764	0.006266	0.000377	9.2e-05	7.6e-05	-0.000599	0.000528	-0.001194	0.013585	0.001259
1416	-0.022364	-0.025363	-0.0238635	0.489175	0.478099	-0.000745	0.006122	0.000398	8.3e-05	8.5e-05	-0.000574	0.000505	-0.001154	0.013249	0.00127
1417	-0.022959	-0.024648	-0.0238035	0.493474	0.476681	-0.000705	0.005951	0.000421	7.5e-05	0.000103	-0.000547	0.000485	-0.001131	0.012938	0.001288
1418	-0.023573	-0.023995	-0.023784	0.497782	0.475049	-0.000614	0.005758	0.000443	6.6e-05	0.00013	-0.000523	0.000471	-0.001133	0.012657	0.001303
1419	-0.024245	-0.023495	-0.02387	0.502019	0.473369	-0.000481	0.005571	0.00046	5.7e-05	0.000163	-0.000501	0.000462	-0.001156	0.012398	0.001301
1420	-0.024889	-0.023118	-0.0240035	0.505279	0.472234	-0.000292	0.005391	0.000471	4.8e-05	0.0002	-0.000482	0.000456	-0.001207	0.012119	0.001297
1421	-0.025517	-0.022996	-0.0242565	0.508549	0.47083	-0.000115	0.005248	0.000479	4e-05	0.000245	-0.000469	0.000456	-0.001264	0.011907	0.00125
1422	-0.026092	-0.023093	-0.0245925	0.511039	0.469713	7.4e-05	0.005134	0.000481	3.4e-05	0.000291	-0.000461	0.000459	-0.001328	0.011718	0.001171
1423	-0.026594	-0.023371	-0.0249825	0.512341	0.469294	0.000237	0.005042	0.000475	3.2e-05	0.000333	-0.000456	0.000462	-0.001387	0.011541	0.001056
1424	-0.027036	-0.023866	-0.025451	0.513042	0.468958	0.000413	0.004956	0.000463	2.8e-05	0.000369	-0.000457	0.000465	-0.00144	0.011383	0.000909
1425	-0.027382	-0.024522	-0.025952	0.512841	0.468973	0.00057	0.004892	0.000444	2.8e-05	0.000393	-0.000459	0.000468	-0.001482	0.011239	0.000743
1426	-0.027673	-0.025313	-0.026493	0.51177	0.469333	0.000706	0.004834	0.000421	2.8e-05	0.000404	-0.000464	0.000467	-0.001513	0.01107	0.000571
1427	-0.027904	-0.026134	-0.027019	0.509775	0.470252	0.000785	0.004789	0.000396	3.2e-05	0.000401	-0.000469	0.000466	-0.001531	0.010875	0.00041
1428	-0.02809	-0.026952	-0.027521	0.50686	0.47179	0.000796	0.004761	0.000375	4e-05	0.000383	-0.000472	0.000461	-0.001535	0.010641	0.000278
1429	-0.02829	-0.027712	-0.028001	0.502934	0.474008	0.000735	0.004753	0.000359	4.8e-05	0.000354	-0.000471	0.00045	-0.00152	0.010327	0.000158
1430	-0.028492	-0.028388	-0.02844	0.49851	0.476415	0.000639	0.004753	0.000349	5.5e-05	0.000317	-0.000468	0.000438	-0.001502	0.009966	7.5e-05
1431	-0.028627	-0.028917	-0.028772	0.493673	0.479121	0.000511	0.004758	0.000344	6.3e-05	0.000277	-0.000463	0.000424	-0.00148	0.009564	2.1e-05
1432	-0.02864	-0.02938	-0.02901	0.489654	0.48086	0.000417	0.004756	0.000343	6.5e-05	0.00024	-0.000458	0.00041	-0.001458	0.009175	1.3e-05
1433	-0.028505	-0.029685	-0.029095	0.484814	0.483472	0.000256	0.004772	0.000347	6.9e-05	0.000204	-0.00045	0.000397	-0.001427	0.00879	1.8e-05
1434	-0.028184	-0.029898	-0.029041	0.480645	0.485699	0.000105	0.004791	0.000353	6.9e-05	0.000176	-0.000441	0.000384	-0.00139	0.00844	3.5e-05
1435	-0.027615	-0.030004	-0.0288095	0.477313	0.487519	-2.1e-05	0.004812	0.00036	6.4e-05	0.000156	-0.000431	0.000374	-0.001352	0.008153	6.1e-05
1436	-0.026838	-0.030017	-0.0284275	0.474723	0.48922	-0.000137	0.004831	0.000366	5.8e-05	0.000143	-0.000421	0.000365	-0.00131	0.0079	9.1e-05
1437	-0.025969	-0.029989	-0.027979	0.474013	0.489564	-0.000172	0.004829	0.00037	4.4e-05	0.000141	-0.000412	0.000359	-0.001275	0.007695	0.000129
1438	-0.024852	-0.029739	-0.0272955	0.473001	0.490995	-0.000231	0.004834	0.000376	3.3e-05	0.000148	-0.000402	0.000354	-0.00124	0.007506	0.000161
1439	-0.02363	-0.02927	-0.02645	0.472224	0.492921	-0.000297	0.00484	0.000381	2.6e-05	0.000165	-0.000392	0.000352	-0.00121	0.007336	0.000191
1440	-0.022429	-0.028697	-0.025563	0.472951	0.493632	-0.000261	0.004792	0.000386	1.2e-05	0.000199	-0.000386	0.000354	-0.001207	0.007235	0.000247
1441	-0.021235	-0.027965	-0.0246	0.473065	0.495195	-0.000255	0.004739	0.000393	3e-06	0.000245	-0.00038	0.000357	-0.001212	0.007159	0.000299
1442	-0.020207	-0.027278	-0.0237425	0.475425	0.494242	-8.5e-05	0.004603	0.000397	-1.5e-05	0.000301	-0.00038	0.000364	-0.001248	0.007124	0.00041
1443	-0.019195	-0.026456	-0.0228255	0.476464	0.494328	2.5e-05	0.004462	0.000402	-2.6e-05	0.000365	-0.000383	0.000372	-0.001295	0.007156	0.00052
1444	-0.018321	-0.02564	-0.0219805	0.478288	0.493277	0.000189	0.004275	0.000403	-3.9e-05	0.000433	-0.000391	0.000382	-0.001362	0.007265	0.000662
1445	-0.017618	-0.02488	-0.021249	0.480397	0.491593	0.00034	0.004082	0.000404	-5e-05	0.000497	-0.000405	0.000394	-0.001445	0.007467	0.000797
1446	-0.017073	-0.024092	-0.0205825	0.481159	0.490681	0.000415	0.003905	0.000402	-5.3e-05	0.000544	-0.000425	0.000406	-0.001534	0.007739	0.000904
1447	-0.01673	-0.02341	-0.02007	0.481626	0.489607	0.000502	0.003718	0.000394	-5.4e-05	0.000571	-0.000445	0.000413	-0.00164	0.008035	0.001017
1448	-0.016585	-0.022731	-0.019658	0.481478	0.488934	0.000549	0.003533	0.000382	-4.9e-05	0.000579	-0.000468	0.000421	-0.001746	0.008362	0.001118
1449	-0.016636	-0.022176	-0.019406	0.480421	0.489025	0.000539	0.003358	0.000365	-3.9e-05	0.000566	-0.00049	0.000428	-0.001844	0.008669	0.001195
1450	-0.016913	-0.021769	-0.019341	0.478695	0.489829	0.000466	0.003219	0.000349	-2.7e-05	0.000535	-0.000511	0.000433	-0.001928	0.008935	0.001233
1451	-0.017393	-0.021482	-0.0194375	0.476052	0.491648	0.000337	0.003104	0.000335	-1.1e-05	0.000489	-0.000528	0.000435	-0.001988	0.009135	0.001236
1452	-0.018035	-0.021161	-0.019598	0.47228	0.494714	0.000135	0.003013	0.000324	7e-06	0.000438	-0.000539	0.000436	-0.002004	0.009288	0.001191
1453	-0.018849	-0.020964	-0.0199065	0.468326	0.497932	-1.9e-05	0.00292	0.000318	2e-05	0.000388	-0.00054	0.000434	-0.002006	0.009346	0.001138
1454	-0.019732	-0.020788	-0.02026	0.463481	0.502002	-0.000192	0.002855	0.000315	3.2e-05	0.000342	-0.000531	0.000427	-0.001982	0.009302	0.001067
1455	-0.020836	-0.020627	-0.0207315	0.45998	0.504657	-0.000286	0.002805	0.000319	3.2e-05	0.000311	-0.000517	0.000419	-0.001951	0.009168	0.000984
1456	-0.021957	-0.02041	-0.0211835	0.456336	0.507406	-0.000386	0.002796	0.000324	3e-05	0.000288	-0.000497	0.000411	-0.001906	0.00898	0.000877
1457	-0.023071	-0.020184	-0.0216275	0.453356	0.509448	-0.000468	0.002821	0.000329	2.3e-05	0.000278	-0.000477	0.000404	-0.001852	0.008759	0.000752
1458	-0.024108	-0.01999	-0.022049	0.451249	0.510659	-0.000529	0.002875	0.000332	1.4e-05	0.00028	-0.000454	0.000397	-0.001792	0.008517	0.000624
1459	-0.025061	-0.01984	-0.0224505	0.450115	0.510932	-0.000566	0.002958	0.000333	1e-06	0.000292	-0.000432	0.000389	-0.001731	0.008238	0.000498
1460	-0.025909	-0.019779	-0.022844	0.450139	0.510202	-0.000594	0.00307	0.000332	-1.1e-05	0.000308	-0.000412	0.000383	-0.001671	0.007933	0.000369
1461	-0.026618	-0.019874	-0.023246	0.451373	0.508519	-0.000602	0.003191	0.000331	-2.4e-05	0.000325	-0.000394	0.000376	-0.001614	0.007606	0.000242
1462	-0.027099	-0.020045	-0.023572	0.453278	0.506702	-0.000611	0.003309	0.00033	-3.4e-05	0.000345	-0.000379	0.00037	-0.001547	0.007282	0.000115
1463	-0.027348	-0.020405	-0.0238765	0.456491	0.503861	-0.000537	0.003387	0.000327	-4.6e-05	0.000363	-0.000367	0.000363	-0.001492	0.006957	3e-05
1464	-0.027347	-0.020842	-0.0240945	0.460195	0.501044	-0.000457	0.003433	0.000324	-5.5e-05	0.00038	-0.000361	0.000357	-0.001433	0.006683	-3.4e-05
1465	-0.027098	-0.021397	-0.0242475	0.464386	0.498031	-0.000329	0.003433	0.00032	-6.4e-05	0.000396	-0.000359	0.000351	-0.001391	0.006425	-7e-05
1466	-0.026691	-0.022035	-0.024363	0.46843	0.495341	-0.000201	0.00341	0.000316	-6.9e-05	0.000412	-0.000363	0.000344	-0.001372	0.006197	-0.000108
1467	-0.026108	-0.022777	-0.0244425	0.472466	0.492809	-6.7e-05	0.00337	0.000311	-7.3e-05	0.000425	-0.000375	0.000338	-0.001357	0.006024	-0.000159
1468	-0.025491	-0.023598	-0.0245445	0.477071	0.489648	9.8e-05	0.003307	0.000304	-7.6e-05	0.000436	-0.000395	0.000333	-0.001348	0.005977	-0.000223
1469	-0.024758	-0.024352	-0.024555	0.479785	0.488178	0.000193	0.003256	0.000292	-7.2e-05	0.000439	-0.000417	0.000328	-0.001332	0.00608	-0.000337
1470	-0.024122	-0.025099	-0.0246105	0.481986	0.486875	0.000259	0.003222	0.000279	-6.6e-05	0.000436	-0.000444	0.000323	-0.001326	0.006316	-0.00049
1471	-0.023621	-0.025917	-0.024769	0.483885	0.485508	0.000307	0.003218	0.000266	-5.7e-05	0.000427	-0.000474	0.000322	-0.001338	0.006682	-0.000659
1472	-0.023305	-0.026676	-0.0249905	0.484332	0.485326	0.000257	0.003257	0.000256	-4.1e-05	0.000411	-0.0005	0.000322	-0.001349	0.007088	-0.000862
1473	-0.023198	-0.027398	-0.025298	0.483728	0.486019	0.000153	0.0033	0.000248	-2e-05	0.00039	-0.000521	0.000323	-0.001365	0.007483	-0.001057
1474	-0.023275	-0.028156	-0.0257155	0.482293	0.487312	3.5e-05	0.003317	0.000242	3e-06	0.000368	-0.000532	0.000323	-0.001377	0.007773	-0.001199
1475	-0.023466	-0.028858	-0.026162	0.479637	0.489609	-8.9e-05	0.003305	0.00024	2.5e-05	0.000348	-0.000528	0.000321	-0.001386	0.007921	-0.001274
1476	-0.023776	-0.029486	-0.026631	0.476392	0.492373	-0.000206	0.003273	0.000238	4.7e-05	0.000328	-0.000511	0.000316	-0.001387	0.007943	-0.001278
1477	-0.024138	-0.030022	-0.02708	0.472768	0.495324	-0.00031	0.003247	0.000236	6.6e-05	0.000309	-0.000488	0.000308	-0.001371	0.007868	-0.001238
1478	-0.024547	-0.030451	-0.027499	0.468983	0.498353	-0.000426	0.00325	0.000232	8.5e-05	0.00029	-0.000455	0.000294	-0.001338	0.007697	-0.001183
1479	-0.025024	-0.030816	-0.02792	0.465834	0.500688	-0.000524	0.003285	0.000227	9.9e-05	0.000272	-0.000421	0.000278	-0.001296	0.007518	-0.001139
1480	-0.025509	-0.031073	-0.028291	0.463492	0.502365	-0.000608	0.003359	0.00022	0.00011	0.000257	-0.000386	0.00026	-0.001259	0.007343	-0.001126
1481	-0.025979	-0.031078	-0.0285285	0.461216	0.504328	-0.000696	0.003467	0.000207	0.000121	0.000241	-0.000353	0.000241	-0.001217	0.007192	-0.00119
1482	-0.02655	-0.031122	-0.028836	0.461136	0.504398	-0.000722	0.003581	0.000193	0.000127	0.000227	-0.000326	0.000223	-0.001194	0.007112	-0.001317
1483	-0.027231	-0.031024	-0.0291275	0.462291	0.503579	-0.000686	0.003687	0.000179	0.000127	0.000214	-0.000303	0.000206	-0.001198	0.007078	-0.001507
1484	-0.027944	-0.0308	-0.029372	0.46471	0.501933	-0.000602	0.003779	0.000167	0.000124	0.0002	-0.000286	0.00019	-0.001216	0.007111	-0.001774
1485	-0.028637	-0.030487	-0.029562	0.468302	0.499504	-0.000472	0.003849	0.000156	0.000118	0.000182	-0.000274	0.000175	-0.001243	0.007107	-0.002116
1486	-0.02926	-0.030068	-0.029664	0.472592	0.496805	-0.000323	0.003903	0.00015	0.000111	0.000161	-0.000264	0.00016	-0.001279	0.006976	-0.002482
1487	-0.029773	-0.029632	-0.0297025	0.47757	0.493692	-0.000124	0.003913	0.000146	0.000102	0.000138	-0.000257	0.000146	-0.001322	0.006747	-0.002834
1488	-0.030122	-0.029208	-0.029665	0.48319	0.490077	0.000107	0.003885	0.000145	9.4e-05	0.000111	-0.000254	0.000134	-0.001377	0.006457	-0.003153
1489	-0.03024	-0.028703	-0.0294715	0.488626	0.486605	0.000331	0.003822	0.000144	8.7e-05	8.3e-05	-0.000253	0.000124	-0.001424	0.006068	-0.003409
1490	-0.030092	-0.02813	-0.029111	0.493402	0.483602	0.000528	0.003726	0.00014	8.4e-05	5.7e-05	-0.000255	0.000116	-0.001528	0.005441	-0.00351
1491	-0.029689	-0.027475	-0.028582	0.497636	0.480876	0.00069	0.003625	0.000137	8.2e-05	3.4e-05	-0.00026	0.000111	-0.001646	0.004851	-0.00358
1492	-0.029066	-0.026766	-0.027916	0.501066	0.47856	0.000802	0.003538	0.000133	7.8e-05	1.8e-05	-0.000269	0.000109	-0.001778	0.004321	-0.003628
1493	-0.028205	-0.025971	-0.027088	0.502557	0.477755	0.000762	0.003511	0.00013	7.8e-05	9e-06	-0.000282	0.000112	-0.001876	0.003917	-0.003725
1494	-0.027289	-0.025161	-0.026225	0.503832	0.476568	0.000761	0.003487	0.000127	7.3e-05	7e-06	-0.000295	0.000118	-0.002005	0.003701	-0.003819
1495	-0.026142	-0.024218	-0.02518	0.502305	0.477651	0.000616	0.003518	0.000123	7.2e-05	1.1e-05	-0.000307	0.000126	-0.002138	0.003612	-0.003913
1496	-0.025038	-0.023283	-0.0241605	0.500022	0.479205	0.000458	0.003568	0.000123	7e-05	2e-05	-0.000316	0.000134	-0.002253	0.003672	-0.004009
1497	-0.023928	-0.022456	-0.023192	0.496458	0.481816	0.000271	0.003631	0.000125	6.9e-05	3.4e-05	-0.00032	0.00014	-0.002319	0.00386	-0.004102
1498	-0.022777	-0.021596	-0.0221865	0.490973	0.486062	5.2e-05	0.003681	0.00013	7e-05	5.2e-05	-0.00032	0.000144	-0.002341	0.00416	-0.004169
1499	-0.021646	-0.020854	-0.02125	0.484789	0.490857	-0.000144	0.003695	0.000139	7.2e-05	7.5e-05	-0.000319	0.000149	-0.002333	0.004527	-0.004193
1500	-0.02064	-0.020238	-0.020439	0.478717	0.495446	-0.000262	0.003658	0.000151	7.4e-05	0.000101	-0.000319	0.000156	-0.002297	0.004966	-0.00415
1501	-0.019547	-0.019708	-0.0196275	0.471557	0.501075	-0.000379	0.003582	0.000162	8.2e-05	0.000125	-0.000317	0.000161	-0.00218	0.005409	-0.004052
1502	-0.018547	-0.019254	-0.0189005	0.464234	0.506752	-0.000455	0.003493	0.000173	9e-05	0.000149	-0.000318	0.000168	-0.002038	0.005841	-0.00389
1503	-0.017742	-0.018909	-0.0183255	0.457577	0.511728	-0.000514	0.003402	0.000182	0.0001	0.000171	-0.000322	0.000178	-0.001911	0.006219	-0.003649
1504	-0.017119	-0.018598	-0.0178585	0.451566	0.515979	-0.000556	0.003328	0.000189	0.00011	0.000192	-0.000332	0.000192	-0.001821	0.006591	-0.003374
1505	-0.016806	-0.018373	-0.0175895	0.446926	0.518947	-0.00059	0.003282	0.00019	0.000119	0.000213	-0.000345	0.000209	-0.001747	0.006905	-0.003081
1506	-0.016764	-0.018223	-0.0174935	0.443666	0.520465	-0.0006	0.003264	0.000189	0.000128	0.000231	-0.000364	0.000229	-0.001696	0.007188	-0.002799
1507	-0.016967	-0.018085	-0.017526	0.441323	0.520994	-0.000603	0.003285	0.000182	0.000134	0.000248	-0.000388	0.000251	-0.001683	0.007442	-0.002542
1508	-0.017345	-0.018029	-0.017687	0.440148	0.520326	-0.000591	0.003336	0.000173	0.000138	0.000265	-0.000417	0.000272	-0.001713	0.007635	-0.002314
1509	-0.017825	-0.01803	-0.0179275	0.439827	0.518732	-0.000545	0.003417	0.000163	0.000137	0.00028	-0.000451	0.000292	-0.00179	0.007786	-0.002142
1510	-0.018319	-0.018103	-0.018211	0.440323	0.516307	-0.000472	0.003507	0.000153	0.000131	0.000292	-0.000489	0.00031	-0.001882	0.007962	-0.002023
1511	-0.01858	-0.018114	-0.018347	0.440334	0.514306	-0.000419	0.003609	0.000145	0.000123	0.000298	-0.000529	0.000326	-0.001954	0.008139	-0.001973
1512	-0.018732	-0.018104	-0.018418	0.441198	0.511442	-0.000298	0.003701	0.000139	0.000108	0.000302	-0.000568	0.000339	-0.002031	0.008341	-0.001962
1513	-0.018684	-0.018137	-0.0184105	0.442805	0.507891	-0.000118	0.003768	0.000133	8.6e-05	0.000305	-0.000603	0.000348	-0.002134	0.008452	-0.001973
1514	-0.018375	-0.018074	-0.0182245	0.443152	0.505688	0	0.003834	0.00013	6.5e-05	0.000306	-0.000629	0.000352	-0.002207	0.008526	-0.00201
1515	-0.017886	-0.018001	-0.0179435	0.443629	0.503643	0.00011	0.003876	0.000127	4.4e-05	0.000306	-0.000643	0.000351	-0.002263	0.008568	-0.002062
1516	-0.017307	-0.017976	-0.0176415	0.443866	0.502244	0.000176	0.003898	0.000121	2.8e-05	0.000301	-0.000636	0.000341	-0.002307	0.008495	-0.002105
1517	-0.016743	-0.017926	-0.0173345	0.443508	0.501974	0.000158	0.003911	0.000115	1.9e-05	0.000291	-0.000611	0.000326	-0.002339	0.008349	-0.00215
1518	-0.01626	-0.017944	-0.017102	0.442771	0.502477	7.9e-05	0.003914	0.000108	1.4e-05	0.00028	-0.000572	0.00031	-0.002354	0.008171	-0.002181
1519	-0.015775	-0.018005	-0.01689	0.441517	0.504028	-6.9e-05	0.003909	0.000103	1.6e-05	0.000267	-0.000524	0.000294	-0.002357	0.007957	-0.002197
1520	-0.015201	-0.018073	-0.016637	0.43912	0.50715	-0.000319	0.003909	9.9e-05	2.6e-05	0.000252	-0.000471	0.000275	-0.002347	0.007687	-0.002201
1521	-0.014869	-0.01815	-0.0165095	0.437754	0.509632	-0.000523	0.003867	9.9e-05	3.6e-05	0.000237	-0.000424	0.000258	-0.002352	0.007417	-0.002155
1522	-0.014553	-0.018285	-0.016419	0.436295	0.51251	-0.000766	0.003796	0.000104	5.2e-05	0.000222	-0.000382	0.00024	-0.002336	0.007124	-0.002075
1523	-0.014308	-0.01836	-0.016334	0.435476	0.514863	-0.000935	0.003639	0.000117	6.7e-05	0.000211	-0.000347	0.000222	-0.002318	0.006845	-0.001939
1524	-0.014082	-0.018387	-0.0162345	0.434917	0.517064	-0.00101	0.003362	0.000135	8e-05	0.000203	-0.000319	0.000205	-0.002293	0.006569	-0.001755
1525	-0.01389	-0.01835	-0.01612	0.43488	0.518822	-0.000987	0.003001	0.000157	8.8e-05	0.000197	-0.000297	0.00019	-0.002256	0.006307	-0.001548
1526	-0.013828	-0.01829	-0.016059	0.435825	0.51972	-0.000889	0.0026	0.000182	9.1e-05	0.000195	-0.000282	0.000179	-0.002215	0.006082	-0.001327
1527	-0.013912	-0.018253	-0.0160825	0.438002	0.519544	-0.000767	0.002229	0.000208	9e-05	0.000194	-0.000272	0.000172	-0.002185	0.005914	-0.001103
1528	-0.014224	-0.018252	-0.016238	0.441551	0.518087	-0.000668	0.001953	0.000231	8.9e-05	0.000191	-0.000266	0.000168	-0.002168	0.005808	-0.000898
1529	-0.014793	-0.018305	-0.016549	0.446546	0.515348	-0.00058	0.001752	0.000255	8.5e-05	0.000189	-0.000266	0.00017	-0.00216	0.005808	-0.000713
1530	-0.015642	-0.01845	-0.017046	0.452786	0.511471	-0.00051	0.001631	0.000274	8e-05	0.000185	-0.000268	0.000173	-0.002156	0.005854	-0.000561
1531	-0.016702	-0.018689	-0.0176955	0.460438	0.506297	-0.000455	0.001608	0.000288	7.2e-05	0.000182	-0.000271	0.000177	-0.002154	0.005951	-0.000454
1532	-0.017874	-0.019047	-0.0184605	0.4683	0.500963	-0.000429	0.001682	0.000296	6.4e-05	0.000179	-0.000273	0.000178	-0.00213	0.006045	-0.000387
1533	-0.019135	-0.019534	-0.0193345	0.476209	0.49551	-0.000429	0.001856	0.000299	5.6e-05	0.000177	-0.000277	0.000178	-0.002092	0.006151	-0.000359
1534	-0.020423	-0.020146	-0.0202845	0.483857	0.490267	-0.000452	0.002134	0.000301	4.9e-05	0.000177	-0.000282	0.000176	-0.002059	0.00629	-0.00035
1535	-0.021639	-0.020821	-0.02123	0.490813	0.485576	-0.000433	0.002431	0.000299	4.1e-05	0.000183	-0.000289	0.000173	-0.002033	0.006452	-0.000347
1536	-0.022757	-0.021541	-0.022149	0.496703	0.481634	-0.000332	0.002688	0.000291	3.1e-05	0.000196	-0.000294	0.000169	-0.002005	0.006609	-0.000333
1537	-0.023733	-0.022246	-0.0229895	0.501501	0.47843	-0.000146	0.00287	0.00028	1.8e-05	0.000218	-0.000298	0.000165	-0.001982	0.00674	-0.000292
1538	-0.024556	-0.022955	-0.0237555	0.505188	0.475817	7.8e-05	0.003011	0.000267	4e-06	0.000246	-0.000298	0.000161	-0.001944	0.006832	-0.000224
1539	-0.025181	-0.023515	-0.024348	0.507261	0.474263	0.00028	0.003144	0.000255	-8e-06	0.000274	-0.000296	0.000158	-0.001901	0.006897	-0.000145
1540	-0.025579	-0.023934	-0.0247565	0.508142	0.473356	0.000452	0.003261	0.000244	-1.7e-05	0.000301	-0.00029	0.000156	-0.001869	0.006918	-4.8e-05
1541	-0.025696	-0.024182	-0.024939	0.506581	0.474432	0.00047	0.003386	0.000231	-1.8e-05	0.000319	-0.000282	0.000154	-0.001826	0.006887	2.9e-05
1542	-0.025723	-0.024286	-0.0250045	0.504027	0.475973	0.00045	0.003482	0.000217	-1.6e-05	0.000329	-0.000272	0.000152	-0.001791	0.006782	0.00011
1543	-0.025581	-0.024269	-0.024925	0.500283	0.478285	0.000359	0.003565	0.000203	-1e-05	0.000327	-0.000261	0.00015	-0.001753	0.006633	0.000189
1544	-0.025292	-0.024137	-0.0247145	0.495262	0.481443	0.000193	0.003644	0.000188	3e-06	0.000311	-0.000249	0.000149	-0.001713	0.006461	0.000258
1545	-0.024936	-0.023953	-0.0244445	0.489996	0.484636	-1.2e-05	0.003712	0.000174	1.8e-05	0.000283	-0.000239	0.000147	-0.001673	0.006285	0.000325
1546	-0.024394	-0.023675	-0.0240345	0.483647	0.488767	-0.000326	0.003798	0.000162	4.1e-05	0.000241	-0.000229	0.000147	-0.001619	0.00614	0.000355
1547	-0.023765	-0.023315	-0.02354	0.47674	0.493313	-0.000653	0.003816	0.000153	6.8e-05	0.000194	-0.00022	0.000146	-0.001562	0.006001	0.000391
1548	-0.023119	-0.022792	-0.0229555	0.469958	0.497718	-0.000815	0.003631	0.000146	9.1e-05	0.000157	-0.000215	0.000145	-0.00153	0.005829	0.000491
1549	-0.022467	-0.022198	-0.0223325	0.463811	0.501608	-0.000792	0.003246	0.000142	0.000111	0.000132	-0.000214	0.000145	-0.001504	0.005703	0.000585
1550	-0.021724	-0.021472	-0.021598	0.457579	0.505708	-0.000721	0.002824	0.000147	0.000134	0.000108	-0.000215	0.000146	-0.00147	0.005657	0.0006
1551	-0.021033	-0.020631	-0.020832	0.45241	0.509	-0.000699	0.002528	0.000159	0.000158	8e-05	-0.000217	0.000147	-0.001453	0.00568	0.000587
1552	-0.020332	-0.019756	-0.020044	0.447932	0.512124	-0.000747	0.00235	0.000172	0.000176	6.1e-05	-0.00022	0.000149	-0.001446	0.005731	0.00056
1553	-0.019743	-0.018861	-0.019302	0.445272	0.513969	-0.000773	0.002249	0.000179	0.000181	5.5e-05	-0.000225	0.000152	-0.00146	0.005809	0.000496
1554	-0.019286	-0.017911	-0.0185985	0.444005	0.514768	-0.000784	0.002242	0.000182	0.000176	5.5e-05	-0.000231	0.000155	-0.0015	0.00593	0.000394
1555	-0.018845	-0.016948	-0.0178965	0.444477	0.514239	-0.000792	0.002319	0.000184	0.000167	5.9e-05	-0.00024	0.00016	-0.00156	0.006129	0.000258
1556	-0.018405	-0.016038	-0.0172215	0.446207	0.512647	-0.0008	0.002483	0.000182	0.000153	6.7e-05	-0.00025	0.000167	-0.001636	0.006389	8.5e-05
1557	-0.017904	-0.015229	-0.0165665	0.448759	0.510264	-0.000789	0.002707	0.000178	0.000132	8e-05	-0.000261	0.000176	-0.001718	0.006711	-0.000106
1558	-0.017336	-0.014514	-0.015925	0.451649	0.507505	-0.000752	0.002967	0.000172	0.000104	0.000101	-0.000272	0.000183	-0.001803	0.007059	-0.000298
1559	-0.016768	-0.013956	-0.015362	0.454961	0.50419	-0.000731	0.00327	0.000169	7.3e-05	0.000127	-0.000283	0.00019	-0.001889	0.007405	-0.000464
1560	-0.016051	-0.013535	-0.014793	0.457647	0.501229	-0.000734	0.003598	0.000171	4.4e-05	0.000153	-0.000294	0.000196	-0.001978	0.007768	-0.000589
1561	-0.015367	-0.013177	-0.014272	0.459648	0.498669	-0.000752	0.003904	0.000174	2e-05	0.000184	-0.000305	0.000201	-0.002053	0.00812	-0.00067
1562	-0.014731	-0.012967	-0.013849	0.461067	0.496613	-0.000748	0.004123	0.000177	-1e-06	0.000218	-0.000316	0.000209	-0.002111	0.008437	-0.000693
1563	-0.014127	-0.01279	-0.0134585	0.460972	0.495954	-0.000731	0.004245	0.000177	-1.5e-05	0.000249	-0.000325	0.000215	-0.002147	0.008725	-0.000653
1564	-0.013558	-0.012628	-0.013093	0.459506	0.496712	-0.000739	0.004296	0.000174	-2.4e-05	0.000278	-0.000335	0.000222	-0.002157	0.008935	-0.000571
1565	-0.013097	-0.012598	-0.0128475	0.456855	0.498699	-0.000809	0.004315	0.000169	-2.7e-05	0.000295	-0.000342	0.000227	-0.002124	0.009052	-0.000465
1566	-0.012844	-0.012543	-0.0126935	0.453247	0.501791	-0.000925	0.004315	0.000163	-2.3e-05	0.000299	-0.000345	0.00023	-0.00207	0.00911	-0.000348
1567	-0.01255	-0.012575	-0.0125625	0.448816	0.505745	-0.001065	0.004307	0.000157	-1.4e-05	0.000291	-0.000349	0.000232	-0.002007	0.009157	-0.000221
1568	-0.012231	-0.012542	-0.0123865	0.442999	0.511105	-0.001242	0.004283	0.00015	-1e-06	0.00027	-0.00035	0.000234	-0.001932	0.009187	-9e-05
1569	-0.011849	-0.012399	-0.012124	0.436062	0.517638	-0.001429	0.004222	0.000144	1.8e-05	0.000241	-0.000349	0.000236	-0.001847	0.009221	2.8e-05
1570	-0.0115	-0.012207	-0.0118535	0.429456	0.523813	-0.001531	0.004089	0.000139	3.6e-05	0.000213	-0.000351	0.000239	-0.001792	0.009246	0.00016
1571	-0.011097	-0.011885	-0.011491	0.422841	0.530048	-0.001577	0.003893	0.000136	5.4e-05	0.000188	-0.000354	0.000242	-0.00175	0.009277	0.000296
1572	-0.010726	-0.011416	-0.011071	0.416793	0.53577	-0.001575	0.003658	0.000135	7e-05	0.00017	-0.000357	0.000246	-0.001722	0.009331	0.000423
1573	-0.010364	-0.010785	-0.0105745	0.410815	0.541516	-0.001559	0.003426	0.000139	8.5e-05	0.000158	-0.000359	0.000248	-0.001711	0.009384	0.000524
1574	-0.010131	-0.010158	-0.0101445	0.407345	0.5449	-0.001546	0.003256	0.000144	9.4e-05	0.000155	-0.000362	0.00025	-0.001719	0.009482	0.000592
1575	-0.00998	-0.009491	-0.0097355	0.405177	0.547042	-0.001553	0.003159	0.000149	9.9e-05	0.000157	-0.000366	0.000252	-0.001751	0.009625	0.000621
1576	-0.010034	-0.008783	-0.0094085	0.404508	0.547852	-0.001576	0.003123	0.000153	0.0001	0.000162	-0.000367	0.000251	-0.001775	0.009863	0.0006
1577	-0.010297	-0.008167	-0.009232	0.407443	0.545201	-0.001565	0.003125	0.000154	9.5e-05	0.000169	-0.000368	0.000252	-0.001786	0.010205	0.000545
1578	-0.010496	-0.007511	-0.0090035	0.411204	0.541786	-0.001556	0.003172	0.000152	8.8e-05	0.000177	-0.000369	0.000252	-0.001785	0.01061	0.000438
1579	-0.01072	-0.006866	-0.008793	0.416254	0.537077	-0.001529	0.003245	0.000148	7.9e-05	0.000186	-0.00037	0.000254	-0.0018	0.011052	0.000321
1580	-0.010827	-0.00616	-0.0084935	0.422085	0.531606	-0.001487	0.003329	0.000143	6.9e-05	0.000199	-0.000373	0.000257	-0.001851	0.01144	0.000232
1581	-0.010842	-0.005389	-0.0081155	0.428342	0.525768	-0.001432	0.003417	0.000139	5.8e-05	0.000214	-0.000378	0.000262	-0.00192	0.011748	0.00016
1582	-0.010762	-0.004659	-0.0077105	0.434694	0.519868	-0.001362	0.0035	0.000136	4.7e-05	0.000232	-0.000384	0.000268	-0.002007	0.011964	0.000109
1583	-0.010695	-0.004138	-0.0074165	0.441192	0.513956	-0.001286	0.003574	0.000135	3.6e-05	0.00025	-0.000392	0.000275	-0.002083	0.012082	6.2e-05
1584	-0.010566	-0.003853	-0.0072095	0.447042	0.508876	-0.00121	0.00364	0.000137	2.7e-05	0.000265	-0.0004	0.000282	-0.002148	0.01207	1.8e-05
1585	-0.010653	-0.003862	-0.0072575	0.452473	0.504665	-0.001142	0.003686	0.000139	2e-05	0.000276	-0.000409	0.000288	-0.002179	0.011886	1e-06
1586	-0.01091	-0.004303	-0.0076065	0.45713	0.501662	-0.001089	0.003713	0.000142	1.7e-05	0.000281	-0.000416	0.000292	-0.002193	0.011552	2e-05
1587	-0.011346	-0.005117	-0.0082315	0.460892	0.499977	-0.001046	0.003704	0.000145	1.8e-05	0.000281	-0.000423	0.000294	-0.002192	0.011072	8.1e-05
1588	-0.012	-0.006269	-0.0091345	0.463973	0.499299	-0.00102	0.003669	0.000146	2.2e-05	0.000275	-0.000426	0.000292	-0.002145	0.010561	0.000143
1589	-0.01269	-0.007544	-0.010117	0.465739	0.499967	-0.001007	0.0036	0.000146	3e-05	0.000262	-0.000425	0.000288	-0.002062	0.010115	0.000212
1590	-0.013397	-0.008949	-0.011173	0.466548	0.50147	-0.001011	0.003521	0.000143	4e-05	0.000242	-0.000416	0.000279	-0.00194	0.009723	0.000272
1591	-0.01412	-0.010315	-0.0122175	0.466336	0.503539	-0.001022	0.00343	0.00014	5.1e-05	0.00022	-0.000401	0.000267	-0.001812	0.009368	0.000342
1592	-0.014869	-0.011658	-0.0132635	0.46534	0.505914	-0.001038	0.003336	0.000137	6.1e-05	0.000196	-0.00038	0.000253	-0.001676	0.009051	0.00041
1593	-0.015634	-0.012955	-0.0142945	0.463845	0.508229	-0.001059	0.003248	0.000135	7.1e-05	0.000169	-0.000351	0.000233	-0.001548	0.008757	0.000469
1594	-0.016478	-0.01414	-0.015309	0.461508	0.51075	-0.001119	0.003199	0.000134	8.2e-05	0.000137	-0.000311	0.000207	-0.001417	0.008452	0.000503
1595	-0.017385	-0.015127	-0.016256	0.459497	0.512136	-0.001122	0.003163	0.000133	8.6e-05	0.00011	-0.000273	0.000184	-0.001338	0.008131	0.000538
1596	-0.018322	-0.015977	-0.0171495	0.457209	0.51312	-0.001147	0.003172	0.000135	8.8e-05	8.4e-05	-0.000236	0.00016	-0.001271	0.007872	0.00053
1597	-0.019242	-0.016628	-0.017935	0.454921	0.513551	-0.001175	0.003216	0.000137	8.8e-05	6.1e-05	-0.000202	0.000139	-0.001219	0.007649	0.000484
1598	-0.020174	-0.017134	-0.018654	0.452598	0.513508	-0.001203	0.003287	0.000139	8.6e-05	4.3e-05	-0.000172	0.000119	-0.001189	0.007437	0.000404
1599	-0.021002	-0.017594	-0.019298	0.450496	0.512964	-0.001219	0.003374	0.00014	8.2e-05	3e-05	-0.000148	0.000103	-0.001183	0.007248	0.000318
1600	-0.021815	-0.017972	-0.0198935	0.449052	0.511612	-0.001221	0.003474	0.000138	7.7e-05	2.4e-05	-0.000131	9e-05	-0.001206	0.007121	0.000231
1601	-0.022689	-0.018439	-0.020564	0.450209	0.507718	-0.001144	0.003548	0.000136	6.7e-05	2.5e-05	-0.000121	8.2e-05	-0.001256	0.007086	0.000161
1602	-0.023366	-0.018759	-0.0210625	0.449846	0.505742	-0.001153	0.00365	0.000134	6.2e-05	2.7e-05	-0.000115	7.6e-05	-0.001286	0.007096	7.2e-05
1603	-0.024012	-0.01894	-0.021476	0.450423	0.503332	-0.001146	0.003749	0.00013	5.8e-05	3.1e-05	-0.000114	7.4e-05	-0.001335	0.007145	6e-06
1604	-0.024651	-0.018998	-0.0218245	0.451825	0.50075	-0.001138	0.003839	0.000127	5.6e-05	3.7e-05	-0.000119	7.6e-05	-0.001395	0.007274	-3.6e-05
1605	-0.025237	-0.018908	-0.0220725	0.45383	0.498318	-0.001134	0.003918	0.000125	5.7e-05	4.3e-05	-0.000128	8.1e-05	-0.001449	0.007441	-6.3e-05
1606	-0.025615	-0.018653	-0.022134	0.455618	0.49682	-0.001148	0.003975	0.000124	6.1e-05	4.8e-05	-0.000141	8.7e-05	-0.001501	0.007617	-5.5e-05
1607	-0.025895	-0.018315	-0.022105	0.458477	0.494845	-0.001119	0.003998	0.000123	6.6e-05	5.5e-05	-0.000158	9.6e-05	-0.001549	0.007785	-8e-06
1608	-0.02581	-0.017967	-0.0218885	0.46013	0.49456	-0.001142	0.003993	0.000124	7.5e-05	6.3e-05	-0.000178	0.000108	-0.001575	0.007908	7e-05
1609	-0.025456	-0.017602	-0.021529	0.461277	0.495251	-0.00116	0.003941	0.000127	8.6e-05	7.3e-05	-0.000201	0.000121	-0.001603	0.007935	0.000201
1610	-0.024928	-0.01718	-0.021054	0.462248	0.496489	-0.001175	0.003848	0.00013	9.7e-05	8.4e-05	-0.000226	0.000137	-0.001621	0.007859	0.00037
1611	-0.024179	-0.016775	-0.020477	0.462735	0.498545	-0.001202	0.00373	0.000135	0.000107	9.4e-05	-0.000249	0.000151	-0.00162	0.007711	0.000556
1612	-0.023239	-0.016442	-0.0198405	0.462736	0.501115	-0.001233	0.003604	0.000141	0.000113	0.000104	-0.000269	0.000164	-0.001606	0.007528	0.000749
1613	-0.022067	-0.016119	-0.019093	0.461915	0.504514	-0.001298	0.003486	0.000148	0.000118	0.000111	-0.000284	0.000174	-0.00157	0.007333	0.000933
1614	-0.020869	-0.015837	-0.018353	0.462013	0.50673	-0.001332	0.003383	0.000154	0.000117	0.000117	-0.000293	0.000182	-0.001528	0.007164	0.001112
1615	-0.019607	-0.015576	-0.0175915	0.46136	0.509294	-0.00138	0.003299	0.000161	0.000114	0.000121	-0.000294	0.000185	-0.001478	0.007034	0.001262
1616	-0.018313	-0.015251	-0.016782	0.459704	0.512519	-0.001454	0.003254	0.000167	0.000109	0.00012	-0.000288	0.000184	-0.001434	0.006951	0.001367
1617	-0.017215	-0.015137	-0.016176	0.459214	0.51409	-0.001496	0.003237	0.000171	9.9e-05	0.00012	-0.000277	0.000182	-0.001414	0.006912	0.001437
1618	-0.016153	-0.015085	-0.015619	0.458099	0.515804	-0.001545	0.003253	0.000173	9.1e-05	0.000119	-0.000262	0.00018	-0.001409	0.006954	0.001453
1619	-0.015331	-0.015113	-0.015222	0.457781	0.516296	-0.00157	0.003288	0.000173	8.2e-05	0.000118	-0.000246	0.000181	-0.001427	0.007078	0.001427
1620	-0.01458	-0.015175	-0.0148775	0.457235	0.516677	-0.001619	0.003365	0.00017	7.6e-05	0.000116	-0.000232	0.000184	-0.001452	0.007322	0.001328
1621	-0.014036	-0.015274	-0.014655	0.456844	0.516347	-0.001635	0.00345	0.000162	7e-05	0.000115	-0.000221	0.000188	-0.001505	0.007577	0.001209
1622	-0.013714	-0.01539	-0.014552	0.456814	0.515226	-0.001637	0.003555	0.000151	6.5e-05	0.000114	-0.000214	0.000195	-0.001568	0.007874	0.001066
1623	-0.013495	-0.015383	-0.014439	0.455696	0.51467	-0.001649	0.003682	0.000138	6.3e-05	0.000112	-0.000211	0.000201	-0.001633	0.008181	0.000915
1624	-0.01341	-0.015357	-0.0143835	0.454542	0.513777	-0.001653	0.003816	0.000126	6.1e-05	0.000111	-0.000212	0.000207	-0.001701	0.008502	0.000767
1625	-0.013458	-0.015247	-0.0143525	0.453272	0.512696	-0.001648	0.003941	0.000115	6.1e-05	0.000111	-0.000218	0.000212	-0.001773	0.008766	0.000644
1626	-0.013641	-0.015094	-0.0143675	0.452577	0.510951	-0.001627	0.004048	0.000106	6.2e-05	0.000113	-0.000229	0.000218	-0.001837	0.008986	0.000545
1627	-0.013744	-0.01484	-0.014292	0.450978	0.50991	-0.001621	0.00414	0.000101	6.4e-05	0.000116	-0.000245	0.000226	-0.001898	0.009151	0.000474
1628	-0.013928	-0.014546	-0.014237	0.450468	0.507791	-0.001567	0.004189	0.0001	6.5e-05	0.000124	-0.000269	0.000235	-0.001969	0.009229	0.000446
1629	-0.013982	-0.014004	-0.013993	0.448821	0.506933	-0.001567	0.004224	0.000102	6.8e-05	0.000132	-0.000299	0.000248	-0.002032	0.009201	0.000447
1630	-0.013963	-0.013405	-0.013684	0.446709	0.506775	-0.001593	0.004241	0.000107	7.3e-05	0.000139	-0.000332	0.000262	-0.002082	0.009039	0.000471
1631	-0.014011	-0.012774	-0.0133925	0.444346	0.507238	-0.001608	0.00422	0.000113	7.7e-05	0.000149	-0.000366	0.000275	-0.002111	0.008749	0.000519
1632	-0.013926	-0.01215	-0.013038	0.441482	0.508806	-0.001669	0.004184	0.000122	8.4e-05	0.000161	-0.000399	0.00029	-0.002095	0.008382	0.000586
1633	-0.013746	-0.011571	-0.0126585	0.438353	0.511168	-0.00174	0.004117	0.00013	9.3e-05	0.000174	-0.000428	0.000301	-0.002055	0.007968	0.000679
1634	-0.013558	-0.011081	-0.0123195	0.435415	0.514029	-0.001805	0.004019	0.000138	0.000103	0.000187	-0.000449	0.000308	-0.001995	0.007524	0.000793
1635	-0.013264	-0.010658	-0.011961	0.432472	0.517434	-0.001864	0.003901	0.000143	0.000114	0.000201	-0.00046	0.000309	-0.001922	0.007115	0.000916
1636	-0.012994	-0.01031	-0.011652	0.430293	0.520505	-0.001888	0.003768	0.000146	0.000121	0.000214	-0.000459	0.000305	-0.001848	0.006749	0.00105
1637	-0.012717	-0.010018	-0.0113675	0.428641	0.523294	-0.001891	0.003636	0.000147	0.000126	0.000225	-0.000448	0.000297	-0.001773	0.006434	0.001181
1638	-0.012513	-0.009824	-0.0111685	0.427563	0.525483	-0.001889	0.003527	0.000147	0.000129	0.000233	-0.000428	0.000285	-0.001695	0.00623	0.001291
1639	-0.012642	-0.009824	-0.011233	0.428058	0.526006	-0.001856	0.003443	0.000147	0.000127	0.000238	-0.000403	0.000272	-0.001638	0.006059	0.001391
1640	-0.012843	-0.01	-0.0114215	0.428805	0.526137	-0.001847	0.00341	0.000148	0.000124	0.000237	-0.000373	0.000258	-0.001581	0.006017	0.00144
1641	-0.013082	-0.010308	-0.011695	0.429193	0.52633	-0.001846	0.003413	0.000149	0.000119	0.000229	-0.000342	0.000244	-0.001538	0.006033	0.001447
1642	-0.01361	-0.010841	-0.0122255	0.431694	0.524236	-0.001817	0.003436	0.000153	0.00011	0.000219	-0.000315	0.000235	-0.001508	0.006174	0.001413
1643	-0.014208	-0.011592	-0.0129	0.434319	0.521692	-0.001762	0.003477	0.000155	0.000101	0.000202	-0.000289	0.000225	-0.001494	0.006378	0.00134
1644	-0.014853	-0.012604	-0.0137285	0.437311	0.518441	-0.001682	0.003531	0.000156	8.9e-05	0.000182	-0.000268	0.000218	-0.001492	0.00667	0.001232
1645	-0.015554	-0.013785	-0.0146695	0.440117	0.515017	-0.001583	0.003596	0.000156	8e-05	0.000161	-0.000252	0.00021	-0.001503	0.006991	0.001107
1646	-0.016223	-0.015137	-0.01568	0.442753	0.511436	-0.001482	0.003694	0.000154	7.1e-05	0.000138	-0.000239	0.000201	-0.001534	0.007299	0.000976
1647	-0.016948	-0.016599	-0.0167735	0.445961	0.507063	-0.001382	0.003832	0.000149	6.4e-05	0.000116	-0.00023	0.000192	-0.001588	0.007593	0.000848
1648	-0.017506	-0.018134	-0.01782	0.448361	0.503364	-0.001315	0.004022	0.000143	5.9e-05	9.7e-05	-0.000225	0.000182	-0.00167	0.007822	0.000719
1649	-0.017983	-0.01966	-0.0188215	0.450175	0.50014	-0.001288	0.004245	0.000137	5.7e-05	8e-05	-0.000222	0.00017	-0.001772	0.007967	0.00058
1650	-0.01835	-0.021123	-0.0197365	0.451995	0.497066	-0.001273	0.004468	0.000131	5.7e-05	6.7e-05	-0.000224	0.00016	-0.001886	0.008028	0.000443
1651	-0.018654	-0.022561	-0.0206075	0.453459	0.494635	-0.001261	0.00466	0.000127	5.7e-05	6e-05	-0.000228	0.000152	-0.002006	0.007987	0.000322
1652	-0.018853	-0.023857	-0.021355	0.454847	0.492763	-0.001248	0.004798	0.000122	5.8e-05	5.7e-05	-0.000234	0.000147	-0.002112	0.007838	0.000235
1653	-0.01882	-0.024972	-0.021896	0.455435	0.492323	-0.001293	0.004895	0.00012	5.9e-05	5.6e-05	-0.00024	0.000145	-0.002161	0.007627	0.000163
1654	-0.018758	-0.025829	-0.0222935	0.455983	0.492402	-0.001308	0.004929	0.000117	5.9e-05	5.8e-05	-0.000244	0.000141	-0.002185	0.00734	0.00014
1655	-0.018678	-0.026431	-0.0225545	0.456533	0.493059	-0.001345	0.004925	0.000117	5.7e-05	6.2e-05	-0.000245	0.000136	-0.002148	0.007011	0.000151
1656	-0.018465	-0.026689	-0.022577	0.457514	0.493837	-0.00134	0.00487	0.000115	5.5e-05	6.7e-05	-0.000242	0.000131	-0.002082	0.006688	0.000212
1657	-0.01801	-0.026587	-0.0222985	0.458305	0.495483	-0.001402	0.004794	0.000115	5.3e-05	7.2e-05	-0.000237	0.000128	-0.001972	0.006434	0.0003
1658	-0.017423	-0.026149	-0.021786	0.459568	0.497289	-0.001455	0.004684	0.000115	5.3e-05	7.8e-05	-0.00023	0.000125	-0.001862	0.006257	0.000429
1659	-0.01691	-0.025466	-0.021188	0.461681	0.498658	-0.001466	0.004544	0.000113	5.4e-05	8.3e-05	-0.000223	0.000123	-0.00177	0.006126	0.000599
1660	-0.016287	-0.024566	-0.0204265	0.464152	0.50001	-0.001486	0.004394	0.000112	5.6e-05	8.6e-05	-0.000215	0.000121	-0.001674	0.006074	0.000769
1661	-0.015799	-0.023521	-0.01966	0.467221	0.500992	-0.001484	0.004226	0.00011	6.1e-05	8.9e-05	-0.000208	0.000121	-0.001585	0.00611	0.000925
1662	-0.015412	-0.022383	-0.0188975	0.470969	0.501173	-0.00144	0.004044	0.000108	6.7e-05	8.9e-05	-0.000203	0.000124	-0.001519	0.006222	0.001076
1663	-0.015267	-0.021126	-0.0181965	0.474753	0.501144	-0.001392	0.003878	0.000105	7.7e-05	8.6e-05	-0.000199	0.00013	-0.001465	0.006386	0.00121
1664	-0.015398	-0.019813	-0.0176055	0.478931	0.500321	-0.001355	0.003755	0.000103	8.8e-05	8.2e-05	-0.000198	0.000141	-0.001428	0.006599	0.001322
1665	-0.015796	-0.018508	-0.017152	0.482862	0.499219	-0.001351	0.003695	0.000102	0.000103	7.3e-05	-0.0002	0.000153	-0.001409	0.006863	0.001398
1666	-0.016564	-0.0173	-0.016932	0.487325	0.497048	-0.001331	0.003675	0.000101	0.000119	6.2e-05	-0.000207	0.000168	-0.001417	0.007151	0.001451
1667	-0.017448	-0.016149	-0.0167985	0.490694	0.495369	-0.001355	0.003702	0.000101	0.000133	5.1e-05	-0.000218	0.000185	-0.001428	0.007466	0.001461
1668	-0.018575	-0.015098	-0.0168365	0.493436	0.493603	-0.001381	0.003746	0.000102	0.000145	4.1e-05	-0.000233	0.000202	-0.00145	0.007773	0.001448
1669	-0.019758	-0.014189	-0.0169735	0.495207	0.49207	-0.00139	0.003797	0.000104	0.000151	3.7e-05	-0.000251	0.000219	-0.001486	0.00802	0.001428
1670	-0.020995	-0.013482	-0.0172385	0.496702	0.490039	-0.001371	0.003858	0.000106	0.00015	4e-05	-0.000274	0.000237	-0.001534	0.008235	0.001398
1671	-0.022158	-0.01297	-0.017564	0.497155	0.488193	-0.001351	0.003936	0.000109	0.000143	4.9e-05	-0.000302	0.000256	-0.00159	0.008444	0.00135
1672	-0.023118	-0.012779	-0.0179485	0.496443	0.486686	-0.001319	0.00402	0.000113	0.000131	6.4e-05	-0.000331	0.000273	-0.001646	0.008663	0.001282
1673	-0.023806	-0.012824	-0.018315	0.494213	0.485923	-0.001319	0.004102	0.000118	0.000115	8.3e-05	-0.000361	0.000289	-0.001684	0.008918	0.001203
1674	-0.024242	-0.013075	-0.0186585	0.490757	0.485769	-0.001307	0.004167	0.000122	9.7e-05	0.000106	-0.000386	0.000303	-0.001724	0.009139	0.001138
1675	-0.024395	-0.013595	-0.018995	0.486254	0.486202	-0.001305	0.004224	0.000123	8e-05	0.000131	-0.000405	0.000313	-0.001754	0.009415	0.001072
1676	-0.024146	-0.014301	-0.0192235	0.479845	0.488201	-0.001396	0.00431	0.000124	6.6e-05	0.000155	-0.000419	0.00032	-0.001769	0.009729	0.001008
1677	-0.023745	-0.015185	-0.019465	0.473491	0.490263	-0.001526	0.004429	0.000121	5.6e-05	0.000176	-0.000424	0.000324	-0.001777	0.010068	0.000949
1678	-0.02307	-0.016085	-0.0195775	0.466244	0.493407	-0.001718	0.004579	0.000115	5e-05	0.000194	-0.00042	0.000323	-0.001773	0.010405	0.000886
1679	-0.022232	-0.016884	-0.019558	0.458649	0.497362	-0.001956	0.004732	0.000107	4.7e-05	0.000209	-0.000408	0.000319	-0.001746	0.010772	0.000814
1680	-0.021274	-0.017514	-0.019394	0.450979	0.501933	-0.0022	0.00486	9.7e-05	4.6e-05	0.00022	-0.00039	0.000314	-0.001696	0.011178	0.000732
1681	-0.02017	-0.017863	-0.0190165	0.442656	0.507883	-0.002451	0.004945	8.8e-05	4.7e-05	0.000225	-0.000369	0.00031	-0.001614	0.011584	0.000638
1682	-0.019062	-0.017957	-0.0185095	0.435367	0.513364	-0.002616	0.004969	7.6e-05	4.9e-05	0.000229	-0.000349	0.000306	-0.001555	0.011858	0.000572
1683	-0.017897	-0.017624	-0.0177605	0.428285	0.51942	-0.002787	0.004961	6.7e-05	5.2e-05	0.00023	-0.00033	0.000306	-0.00148	0.012056	0.00052
1684	-0.016725	-0.016959	-0.016842	0.422043	0.525259	-0.002918	0.004906	6.1e-05	5.6e-05	0.000231	-0.000316	0.00031	-0.001409	0.012169	0.000487
1685	-0.015568	-0.016124	-0.015846	0.416777	0.530549	-0.002996	0.004806	5.9e-05	6.1e-05	0.000231	-0.000307	0.000317	-0.001348	0.012221	0.000467
1686	-0.014504	-0.015156	-0.01483	0.413112	0.534593	-0.002995	0.004648	6.2e-05	6.4e-05	0.000233	-0.000304	0.000328	-0.001302	0.01224	0.000467
1687	-0.013412	-0.014252	-0.013832	0.410816	0.537415	-0.002905	0.004422	6.6e-05	6.9e-05	0.000235	-0.000308	0.000341	-0.001281	0.012208	0.000496
1688	-0.012379	-0.013402	-0.0128905	0.409991	0.538848	-0.002749	0.00415	7.2e-05	7.3e-05	0.000241	-0.000318	0.000357	-0.001282	0.012138	0.000542
1689	-0.011429	-0.012615	-0.012022	0.410895	0.538577	-0.002559	0.003871	8.1e-05	7.8e-05	0.000247	-0.000337	0.000376	-0.00131	0.01204	0.000592
1690	-0.010564	-0.011975	-0.0112695	0.413888	0.536048	-0.00239	0.003649	9.1e-05	8.2e-05	0.000255	-0.000363	0.000396	-0.001367	0.011921	0.000661
1691	-0.009627	-0.01118	-0.0104035	0.416897	0.533359	-0.002297	0.003528	0.000101	9e-05	0.000259	-0.000393	0.000415	-0.001441	0.011812	0.000725
1692	-0.008839	-0.010561	-0.0097	0.422059	0.528205	-0.002243	0.003474	0.000111	0.0001	0.000265	-0.000428	0.000437	-0.001532	0.011774	0.000803
1693	-0.008205	-0.009869	-0.009037	0.426972	0.5229	-0.002201	0.003453	0.00012	0.000108	0.000271	-0.000466	0.000458	-0.001643	0.011711	0.000873
1694	-0.007815	-0.009227	-0.008521	0.432073	0.516995	-0.002159	0.003457	0.000128	0.000114	0.000279	-0.000505	0.000477	-0.00176	0.01164	0.000932
1695	-0.007625	-0.008556	-0.0080905	0.436289	0.511616	-0.002122	0.003474	0.000135	0.000118	0.000287	-0.000541	0.000491	-0.001883	0.011516	0.000991
1696	-0.007622	-0.007939	-0.0077805	0.440236	0.506348	-0.002088	0.003502	0.00014	0.000117	0.000298	-0.000571	0.000504	-0.002001	0.01144	0.001039
1697	-0.007879	-0.007447	-0.007663	0.443098	0.502129	-0.002062	0.003542	0.000144	0.000112	0.000309	-0.000594	0.000515	-0.002098	0.011439	0.001052
1698	-0.008387	-0.007105	-0.007746	0.444888	0.499209	-0.002046	0.003583	0.000146	0.000104	0.00032	-0.000607	0.000524	-0.002175	0.01153	0.001025
1699	-0.009113	-0.006946	-0.0080295	0.445377	0.498127	-0.002047	0.003615	0.000145	9.3e-05	0.000327	-0.00061	0.000532	-0.002222	0.011745	0.000959
1700	-0.009966	-0.006941	-0.0084535	0.444601	0.498751	-0.002087	0.003662	0.000142	8.2e-05	0.000331	-0.000603	0.000536	-0.002233	0.012056	0.000866
1701	-0.010837	-0.00707	-0.0089535	0.442639	0.501055	-0.002209	0.003765	0.000135	7.2e-05	0.000331	-0.000584	0.000537	-0.002205	0.012455	0.000747
1702	-0.0117	-0.007325	-0.0095125	0.439519	0.504937	-0.002443	0.003969	0.000125	6.5e-05	0.000325	-0.000557	0.000534	-0.002138	0.012963	0.000585
1703	-0.012379	-0.007549	-0.009964	0.435499	0.509979	-0.002773	0.00426	0.000112	6.1e-05	0.000312	-0.000528	0.000529	-0.002044	0.013573	0.000376
1704	-0.012833	-0.00773	-0.0102815	0.431199	0.515443	-0.003114	0.004558	9.5e-05	6.2e-05	0.000292	-0.000498	0.000522	-0.001935	0.014228	0.000135
1705	-0.012986	-0.007808	-0.010397	0.426221	0.521635	-0.003427	0.004816	7.9e-05	6.8e-05	0.000268	-0.00047	0.000514	-0.001814	0.014865	-9.7e-05
1706	-0.012819	-0.00782	-0.0103195	0.421357	0.527765	-0.003681	0.00502	6.3e-05	7.8e-05	0.000242	-0.000445	0.000505	-0.001706	0.015402	-0.00031
1707	-0.012451	-0.007872	-0.0101615	0.417028	0.533287	-0.003851	0.005158	5.2e-05	8.8e-05	0.000217	-0.000427	0.000496	-0.001611	0.015835	-0.0005
1708	-0.01187	-0.007881	-0.0098755	0.4133	0.538082	-0.003948	0.005227	4.4e-05	9.5e-05	0.000197	-0.000417	0.000488	-0.001535	0.016115	-0.000644
1709	-0.011116	-0.007884	-0.0095	0.410488	0.541824	-0.003983	0.00523	4.2e-05	9.9e-05	0.000183	-0.000415	0.00048	-0.001482	0.016174	-0.000712
1710	-0.010361	-0.007905	-0.009133	0.409039	0.544006	-0.003948	0.00517	4.5e-05	9.9e-05	0.000178	-0.000421	0.000475	-0.001449	0.016039	-0.000697
1711	-0.009687	-0.008041	-0.008864	0.409442	0.544026	-0.003831	0.00504	5.4e-05	9.5e-05	0.000178	-0.000435	0.000471	-0.001445	0.015718	-0.000618
1712	-0.009142	-0.008197	-0.0086695	0.411319	0.54248	-0.003672	0.004896	7e-05	9.1e-05	0.000186	-0.000455	0.00047	-0.001441	0.015284	-0.000464
1713	-0.008738	-0.00842	-0.008579	0.415052	0.538928	-0.003454	0.004722	9.1e-05	8.4e-05	0.000201	-0.000479	0.000472	-0.001448	0.014733	-0.000273
1714	-0.008473	-0.008739	-0.008606	0.42008	0.533917	-0.0032	0.004539	0.000114	7.8e-05	0.00022	-0.000506	0.000474	-0.001459	0.014132	-6.5e-05
1715	-0.00847	-0.009305	-0.0088875	0.427157	0.526748	-0.002916	0.004366	0.000138	7.1e-05	0.000243	-0.000536	0.000479	-0.001474	0.013551	0.000142
1716	-0.00871	-0.010119	-0.0094145	0.435043	0.518707	-0.002623	0.004216	0.000162	6.7e-05	0.000266	-0.000564	0.000483	-0.001497	0.012956	0.000335
1717	-0.009161	-0.011133	-0.010147	0.443239	0.510416	-0.002339	0.004107	0.000181	6.6e-05	0.000286	-0.000585	0.000486	-0.001521	0.01243	0.000502
1718	-0.009953	-0.012436	-0.0111945	0.451981	0.501681	-0.002012	0.004012	0.000195	6.5e-05	0.000304	-0.0006	0.000489	-0.001556	0.011947	0.000641
1719	-0.010961	-0.013921	-0.012441	0.459773	0.494166	-0.00173	0.003963	0.000204	7e-05	0.000313	-0.000604	0.00049	-0.001578	0.011619	0.000742
1720	-0.012298	-0.015591	-0.0139445	0.466702	0.487796	-0.001476	0.003944	0.000208	7.8e-05	0.000315	-0.000594	0.000487	-0.001593	0.011411	0.000816
1721	-0.013817	-0.017275	-0.015546	0.472176	0.483127	-0.001252	0.003934	0.000206	9e-05	0.000311	-0.000573	0.000482	-0.001604	0.011275	0.000858
1722	-0.01547	-0.018981	-0.0172255	0.476634	0.4798	-0.001067	0.003927	0.0002	0.000101	0.000301	-0.000542	0.000475	-0.001602	0.011263	0.000887
1723	-0.017166	-0.020598	-0.018882	0.479927	0.477805	-0.000935	0.003933	0.000192	0.00011	0.000286	-0.000506	0.000465	-0.001578	0.011413	0.0009
1724	-0.018792	-0.022053	-0.0204225	0.482038	0.476966	-0.000849	0.003943	0.000182	0.000119	0.000267	-0.000467	0.00045	-0.001545	0.011644	0.000904
1725	-0.020128	-0.023304	-0.021716	0.482815	0.477136	-0.000855	0.003989	0.000172	0.000127	0.000242	-0.000427	0.00043	-0.001502	0.012	0.000895
1726	-0.021112	-0.024305	-0.0227085	0.481783	0.478749	-0.000968	0.004078	0.000164	0.000137	0.000213	-0.000389	0.000409	-0.00145	0.01243	0.000874
1727	-0.02179	-0.025161	-0.0234755	0.48031	0.480232	-0.001096	0.004196	0.000154	0.000143	0.000182	-0.000356	0.000384	-0.001406	0.012862	0.000837
1728	-0.022154	-0.02593	-0.024042	0.478615	0.481593	-0.001275	0.004327	0.000147	0.000151	0.00015	-0.000328	0.00036	-0.001349	0.013293	0.000795
1729	-0.022123	-0.026521	-0.024322	0.476208	0.483309	-0.001459	0.004449	0.00014	0.000158	0.000116	-0.000305	0.000337	-0.001296	0.013679	0.000738
1730	-0.021798	-0.026924	-0.024361	0.473792	0.484749	-0.001625	0.00456	0.000133	0.000163	8.3e-05	-0.000288	0.000317	-0.001254	0.013955	0.000684
1731	-0.021126	-0.027093	-0.0241095	0.470689	0.486852	-0.001793	0.004669	0.000128	0.000167	5e-05	-0.000277	0.000303	-0.001224	0.014109	0.000633
1732	-0.020255	-0.027145	-0.0237	0.468205	0.488547	-0.001922	0.004754	0.000124	0.000167	2.3e-05	-0.000274	0.000297	-0.001211	0.014101	0.00062
1733	-0.019114	-0.026951	-0.0230325	0.465209	0.491016	-0.002012	0.004822	0.000119	0.000165	0	-0.000277	0.000294	-0.001217	0.013924	0.000635
1734	-0.017998	-0.0265	-0.022249	0.463398	0.492796	-0.002052	0.004862	0.000118	0.000159	-1.4e-05	-0.000288	0.000298	-0.001232	0.013643	0.000682
1735	-0.016853	-0.025769	-0.021311	0.461696	0.494884	-0.002073	0.004896	0.000118	0.000151	-2.1e-05	-0.000304	0.000305	-0.001253	0.013256	0.000749
1736	-0.015759	-0.024775	-0.020267	0.460426	0.49693	-0.002055	0.00492	0.000122	0.000142	-2e-05	-0.000324	0.000315	-0.001278	0.012809	0.000813
1737	-0.014773	-0.023547	-0.01916	0.459872	0.498569	-0.001992	0.004929	0.000128	0.000132	-9e-06	-0.000349	0.000328	-0.001309	0.012349	0.000881
1738	-0.013994	-0.022234	-0.018114	0.461247	0.49837	-0.001897	0.004926	0.000137	0.000121	1.2e-05	-0.000378	0.000345	-0.001343	0.011933	0.00095
1739	-0.013209	-0.020862	-0.0170355	0.463322	0.49723	-0.001759	0.004898	0.00015	0.000111	3.9e-05	-0.000407	0.000362	-0.001386	0.011471	0.001028
1740	-0.012437	-0.019444	-0.0159405	0.465938	0.495163	-0.001604	0.00486	0.000165	0.000105	6.9e-05	-0.000434	0.000381	-0.001431	0.011069	0.001101
1741	-0.011677	-0.017997	-0.014837	0.469086	0.492198	-0.001452	0.004809	0.000181	0.000101	0.000102	-0.000461	0.000406	-0.001484	0.01078	0.001176
1742	-0.011052	-0.016643	-0.0138475	0.472173	0.489021	-0.001299	0.004741	0.000196	0.000101	0.000134	-0.000482	0.000432	-0.001541	0.01052	0.001262
1743	-0.010573	-0.01546	-0.0130165	0.475053	0.485889	-0.00114	0.004652	0.000208	0.000105	0.000163	-0.0005	0.000459	-0.001601	0.010331	0.001354
1744	-0.010285	-0.014563	-0.012424	0.477254	0.483568	-0.001009	0.004551	0.000215	0.000114	0.000184	-0.000512	0.000487	-0.001651	0.010283	0.001443
1745	-0.010278	-0.013988	-0.012133	0.478825	0.482234	-0.000917	0.004444	0.000216	0.000126	0.0002	-0.000521	0.000513	-0.00168	0.010389	0.001531
1746	-0.010663	-0.013828	-0.0122455	0.47981	0.481928	-0.00085	0.004332	0.000211	0.000141	0.000209	-0.000525	0.000532	-0.001684	0.010595	0.001621
1747	-0.011485	-0.014012	-0.0127485	0.479882	0.482866	-0.000816	0.004213	0.0002	0.000158	0.000213	-0.000527	0.000544	-0.001668	0.010882	0.001722
1748	-0.012591	-0.014529	-0.01356	0.480356	0.483715	-0.000782	0.004087	0.000187	0.000173	0.000214	-0.000526	0.000548	-0.001637	0.011235	0.001832
1749	-0.013724	-0.015113	-0.0144185	0.47909	0.486211	-0.000849	0.003979	0.000176	0.000191	0.00021	-0.000521	0.000544	-0.001583	0.011633	0.001945
1750	-0.014863	-0.015801	-0.015332	0.477408	0.488584	-0.000862	0.003847	0.000166	0.000205	0.000205	-0.000515	0.000533	-0.001547	0.011957	0.002067
1751	-0.015915	-0.016522	-0.0162185	0.474437	0.491665	-0.000969	0.003757	0.000167	0.000219	0.000199	-0.000507	0.000519	-0.001499	0.012305	0.002163
1752	-0.016824	-0.017311	-0.0170675	0.470986	0.494588	-0.001087	0.00369	0.000175	0.00023	0.00019	-0.000498	0.000503	-0.001456	0.012559	0.002225
1753	-0.017536	-0.018112	-0.017824	0.466535	0.497691	-0.001219	0.003653	0.000187	0.000239	0.000179	-0.000489	0.000489	-0.001425	0.012715	0.002238
1754	-0.018034	-0.019035	-0.0185345	0.460931	0.501196	-0.001347	0.003654	0.000201	0.000244	0.000166	-0.000478	0.000474	-0.001402	0.012721	0.002214
1755	-0.018418	-0.020067	-0.0192425	0.455319	0.504137	-0.001456	0.003695	0.000217	0.000246	0.000152	-0.000466	0.000459	-0.001379	0.012669	0.002141
1756	-0.018665	-0.021156	-0.0199105	0.449807	0.506509	-0.001533	0.003771	0.00023	0.000247	0.000138	-0.000454	0.000445	-0.001357	0.012533	0.002029
1757	-0.018775	-0.022185	-0.02048	0.44452	0.508498	-0.001585	0.003891	0.000239	0.000247	0.000122	-0.000443	0.000434	-0.001337	0.012363	0.001872
1758	-0.018864	-0.023212	-0.021038	0.439884	0.509723	-0.001611	0.004057	0.000241	0.000249	0.000107	-0.000433	0.000424	-0.001317	0.012179	0.001679
1759	-0.018931	-0.024083	-0.021507	0.436242	0.510249	-0.001608	0.004267	0.000241	0.000249	9e-05	-0.000423	0.000417	-0.001296	0.012019	0.001445
1760	-0.018991	-0.024729	-0.02186	0.434363	0.509464	-0.001555	0.004526	0.000234	0.000247	7.5e-05	-0.000416	0.000413	-0.001282	0.011912	0.001161
1761	-0.019044	-0.025125	-0.0220845	0.434339	0.507513	-0.001449	0.004823	0.000224	0.000243	6e-05	-0.000409	0.000414	-0.001275	0.011862	0.000832
1762	-0.01909	-0.02524	-0.022165	0.435895	0.504808	-0.001298	0.005125	0.000218	0.000235	4.8e-05	-0.000404	0.000418	-0.001277	0.011819	0.000512
1763	-0.019084	-0.025052	-0.022068	0.438865	0.50155	-0.001095	0.005414	0.000215	0.000224	3.9e-05	-0.000398	0.000423	-0.00129	0.011727	0.000233
1764	-0.019053	-0.024638	-0.0218455	0.443634	0.497119	-0.000829	0.005669	0.000218	0.000207	3.4e-05	-0.000392	0.000429	-0.001319	0.011584	9e-06
1765	-0.018969	-0.02398	-0.0214745	0.448994	0.492892	-0.000589	0.005913	0.000228	0.000191	3.1e-05	-0.000384	0.000432	-0.001355	0.011406	-0.00014
1766	-0.01883	-0.023188	-0.021009	0.454866	0.488811	-0.000383	0.006121	0.000243	0.000172	3.2e-05	-0.000376	0.00043	-0.001395	0.011134	-0.000194
1767	-0.018755	-0.022412	-0.0205835	0.460547	0.485444	-0.000245	0.006283	0.000262	0.000153	3.2e-05	-0.000366	0.000421	-0.001431	0.010754	-0.000165
1768	-0.018836	-0.021723	-0.0202795	0.466038	0.482965	-0.000188	0.006388	0.00028	0.000135	2.7e-05	-0.000354	0.000405	-0.001454	0.010309	-6.3e-05
1769	-0.019038	-0.021278	-0.020158	0.471246	0.4815	-0.000251	0.006435	0.000295	0.000121	1.2e-05	-0.000335	0.000382	-0.001458	0.009854	0.000131
1770	-0.019306	-0.020974	-0.02014	0.474861	0.482077	-0.000471	0.006422	0.000306	0.000117	-1.8e-05	-0.000309	0.000352	-0.001437	0.009446	0.000397
1771	-0.019731	-0.020892	-0.0203115	0.478208	0.483058	-0.000706	0.006332	0.000311	0.000116	-5.3e-05	-0.000281	0.00032	-0.001401	0.009119	0.000675
1772	-0.02021	-0.021059	-0.0206345	0.481257	0.484161	-0.000962	0.006191	0.000311	0.000121	-9.2e-05	-0.000248	0.000288	-0.001352	0.00889	0.000935
1773	-0.020852	-0.021426	-0.021139	0.485076	0.484223	-0.001181	0.006012	0.00031	0.00013	-0.000127	-0.000217	0.000258	-0.001297	0.008755	0.001151
1774	-0.021432	-0.021693	-0.0215625	0.487218	0.485417	-0.001417	0.005823	0.00031	0.000147	-0.00016	-0.000186	0.000229	-0.001241	0.008666	0.001309
1775	-0.022058	-0.021974	-0.022016	0.488956	0.486533	-0.001622	0.005638	0.000313	0.000168	-0.000181	-0.000161	0.000207	-0.001183	0.008656	0.0014
1776	-0.022765	-0.022313	-0.022539	0.490509	0.48729	-0.001761	0.00548	0.000316	0.000191	-0.000197	-0.000141	0.000191	-0.001136	0.008749	0.001392
1777	-0.023515	-0.022697	-0.023106	0.492245	0.487364	-0.001832	0.005362	0.000316	0.000215	-0.00021	-0.000126	0.000179	-0.001095	0.008962	0.001265
1778	-0.024276	-0.022984	-0.02363	0.49363	0.487486	-0.001904	0.005335	0.000316	0.000241	-0.000217	-0.000117	0.000176	-0.001049	0.0093	0.001024
1779	-0.02506	-0.023227	-0.0241435	0.494885	0.487427	-0.001936	0.005366	0.000314	0.000267	-0.00022	-0.000112	0.000177	-0.001007	0.009744	0.000686
1780	-0.025856	-0.02345	-0.024653	0.495775	0.487454	-0.001967	0.005483	0.000307	0.000297	-0.000217	-0.00011	0.000184	-0.000965	0.010247	0.000275
1781	-0.026678	-0.02373	-0.025204	0.49691	0.48687	-0.001935	0.005661	0.000295	0.000325	-0.000211	-0.00011	0.000191	-0.000933	0.010786	-0.000192
1782	-0.027497	-0.023976	-0.0257365	0.498066	0.485938	-0.001874	0.005904	0.000281	0.000352	-0.000201	-0.000112	0.000201	-0.000906	0.01134	-0.000699
1783	-0.028351	-0.024205	-0.026278	0.499514	0.484418	-0.001772	0.006209	0.000262	0.000376	-0.00019	-0.000116	0.000213	-0.000887	0.011902	-0.001259
1784	-0.029266	-0.024445	-0.0268555	0.500929	0.482724	-0.00165	0.006557	0.000244	0.000398	-0.000177	-0.000123	0.000225	-0.000869	0.012356	-0.001812
1785	-0.030206	-0.024688	-0.027447	0.50235	0.480826	-0.001495	0.006921	0.00023	0.000416	-0.000165	-0.000132	0.000238	-0.000857	0.012653	-0.002312
1786	-0.031134	-0.024937	-0.0280355	0.504288	0.478185	-0.001292	0.007258	0.000221	0.000426	-0.000153	-0.000143	0.000251	-0.000853	0.012781	-0.002732
1787	-0.031951	-0.025153	-0.028552	0.506152	0.475323	-0.001076	0.007565	0.000216	0.000431	-0.000147	-0.000156	0.000264	-0.000856	0.012799	-0.003037
1788	-0.032658	-0.02538	-0.029019	0.508	0.472358	-0.000853	0.00783	0.000216	0.000428	-0.000145	-0.000169	0.000274	-0.000867	0.012718	-0.003227
1789	-0.033148	-0.025559	-0.0293535	0.509431	0.469678	-0.000663	0.008036	0.000224	0.000417	-0.000139	-0.000182	0.000283	-0.000879	0.012536	-0.003314
1790	-0.033422	-0.025691	-0.0295565	0.510297	0.467506	-0.000544	0.008177	0.000239	0.0004	-0.000133	-0.000194	0.00029	-0.000889	0.012239	-0.003304
1791	-0.033509	-0.02578	-0.0296445	0.510306	0.466352	-0.000569	0.008266	0.00026	0.000383	-0.000132	-0.000202	0.000292	-0.00089	0.011846	-0.003188
1792	-0.033377	-0.025845	-0.029611	0.509251	0.466374	-0.000727	0.008298	0.000283	0.000366	-0.000135	-0.000205	0.00029	-0.00088	0.011404	-0.002979
1793	-0.033016	-0.025948	-0.029482	0.507158	0.467659	-0.001023	0.008261	0.000305	0.000354	-0.000141	-0.000202	0.000284	-0.00086	0.010947	-0.002673
1794	-0.032501	-0.026088	-0.0292945	0.504489	0.469585	-0.001364	0.008138	0.000326	0.000343	-0.000148	-0.000194	0.000276	-0.000838	0.010443	-0.002281
1795	-0.031805	-0.026208	-0.0290065	0.500786	0.472504	-0.001773	0.007973	0.000346	0.000336	-0.000148	-0.000181	0.000267	-0.000811	0.009947	-0.001826
1796	-0.031039	-0.026385	-0.028712	0.497122	0.475182	-0.002139	0.007753	0.000366	0.00033	-0.000139	-0.000166	0.000258	-0.000796	0.009429	-0.001335
1797	-0.030207	-0.026557	-0.028382	0.493201	0.477994	-0.002458	0.007503	0.000385	0.000326	-0.000123	-0.00015	0.00025	-0.000793	0.008969	-0.00085
1798	-0.02934	-0.026704	-0.028022	0.488951	0.481165	-0.00276	0.007284	0.000407	0.000325	-0.000103	-0.000133	0.000243	-0.000796	0.008577	-0.000365
1799	-0.028463	-0.026805	-0.027634	0.484975	0.484103	-0.003007	0.007102	0.000429	0.000325	-8.2e-05	-0.000117	0.000238	-0.000814	0.008282	7.7e-05
1800	-0.027544	-0.026728	-0.027136	0.481042	0.487171	-0.003189	0.006969	0.000445	0.000329	-6.2e-05	-0.000103	0.000234	-0.000845	0.008131	0.000425
1801	-0.026645	-0.02653	-0.0265875	0.477502	0.490093	-0.00337	0.006943	0.000457	0.000339	-4.7e-05	-9e-05	0.000233	-0.000878	0.008114	0.000675
1802	-0.025809	-0.026212	-0.0260105	0.475167	0.491806	-0.003449	0.00695	0.000459	0.000343	-3.5e-05	-8e-05	0.000231	-0.000926	0.008186	0.000809
1803	-0.025003	-0.025697	-0.02535	0.472846	0.49373	-0.00352	0.007044	0.000458	0.000352	-3.1e-05	-7.2e-05	0.000231	-0.000969	0.008303	0.000851
1804	-0.024219	-0.025034	-0.0246265	0.471379	0.494897	-0.003546	0.007212	0.000447	0.000363	-3.5e-05	-6.5e-05	0.000232	-0.001007	0.008483	0.000782
1805	-0.023591	-0.024426	-0.0240085	0.472137	0.493559	-0.003449	0.007366	0.000425	0.000364	-4.5e-05	-6.2e-05	0.000233	-0.001049	0.008644	0.000654
1806	-0.022974	-0.023677	-0.0233255	0.47232	0.492738	-0.003364	0.007589	0.000402	0.000372	-6.6e-05	-5.6e-05	0.000234	-0.001078	0.008783	0.000494
1807	-0.02243	-0.022876	-0.022653	0.472511	0.49159	-0.003247	0.007828	0.000375	0.000381	-9.3e-05	-5.1e-05	0.000236	-0.001096	0.008849	0.000326
1808	-0.021986	-0.022103	-0.0220445	0.473714	0.489108	-0.003047	0.008026	0.000345	0.000383	-0.000123	-4.7e-05	0.000236	-0.001109	0.008815	0.000171
1809	-0.021596	-0.021285	-0.0214405	0.475201	0.486036	-0.002794	0.008186	0.000316	0.000379	-0.000152	-4.3e-05	0.000235	-0.00113	0.008674	8.4e-05
1810	-0.02123	-0.020403	-0.0208165	0.476525	0.482944	-0.002526	0.008318	0.000288	0.000374	-0.000179	-3.9e-05	0.000233	-0.001144	0.00848	5.5e-05
1811	-0.020958	-0.019639	-0.0202985	0.477926	0.479704	-0.002201	0.008362	0.000262	0.000362	-0.000203	-3.5e-05	0.000227	-0.001154	0.008163	9e-05
1812	-0.020827	-0.018941	-0.019884	0.478934	0.477087	-0.001976	0.008392	0.000239	0.00035	-0.000222	-2.8e-05	0.000221	-0.001143	0.00782	0.000178
1813	-0.02087	-0.018377	-0.0196235	0.478932	0.475786	-0.00186	0.00839	0.00022	0.000339	-0.000237	-1.7e-05	0.000212	-0.001114	0.007445	0.000319
1814	-0.021286	-0.018063	-0.0196745	0.478807	0.475116	-0.001774	0.008315	0.000201	0.000322	-0.000242	-2e-06	0.0002	-0.001076	0.007005	0.000515
1815	-0.021843	-0.018036	-0.0199395	0.477789	0.475887	-0.00188	0.008234	0.000188	0.000308	-0.000241	2.2e-05	0.000185	-0.001014	0.006591	0.000777
1816	-0.022461	-0.018288	-0.0203745	0.47619	0.477533	-0.002076	0.008124	0.000179	0.000295	-0.000232	4.6e-05	0.000171	-0.000947	0.006272	0.001038
1817	-0.023049	-0.018812	-0.0209305	0.474281	0.47982	-0.002396	0.008034	0.000178	0.000285	-0.000214	6.7e-05	0.000162	-0.00088	0.00612	0.001283
1818	-0.023654	-0.019541	-0.0215975	0.472596	0.48191	-0.002725	0.007939	0.000183	0.000275	-0.000188	8.3e-05	0.000158	-0.000832	0.006052	0.001529
1819	-0.024133	-0.020541	-0.022337	0.47144	0.483191	-0.002915	0.00779	0.000189	0.000261	-0.000155	8.6e-05	0.000156	-0.000819	0.005984	0.001764
1820	-0.024444	-0.021616	-0.02303	0.470224	0.484602	-0.00319	0.00776	0.000202	0.000254	-0.00012	8.9e-05	0.000161	-0.000815	0.006041	0.001976
1821	-0.024732	-0.022874	-0.023803	0.471064	0.483756	-0.003329	0.007725	0.000211	0.000241	-8e-05	8.2e-05	0.000172	-0.000844	0.00615	0.002136
1822	-0.024903	-0.0241	-0.0245015	0.472534	0.482528	-0.003467	0.007788	0.000222	0.000232	-4e-05	7.5e-05	0.000189	-0.000885	0.00632	0.002247
1823	-0.025044	-0.025351	-0.0251975	0.475097	0.480421	-0.003519	0.007891	0.000227	0.000223	-1e-06	6.2e-05	0.000209	-0.000944	0.006482	0.002309
1824	-0.025208	-0.026568	-0.025888	0.478841	0.477288	-0.003469	0.007989	0.000225	0.000214	3.7e-05	4.3e-05	0.00023	-0.001021	0.006594	0.002336
1825	-0.025396	-0.027774	-0.026585	0.483866	0.473043	-0.003339	0.008087	0.000214	0.000204	7e-05	2.3e-05	0.000249	-0.001094	0.006683	0.002321
1826	-0.0255	-0.028753	-0.0271265	0.488088	0.47003	-0.003218	0.008253	0.000204	0.000201	9.7e-05	5e-06	0.000266	-0.001157	0.006759	0.002269
1827	-0.025496	-0.029527	-0.0275115	0.491333	0.468225	-0.003056	0.008431	0.00019	0.000201	0.000119	-1.3e-05	0.000276	-0.00121	0.006735	0.002193
1828	-0.025497	-0.03017	-0.0278335	0.496183	0.465184	-0.002829	0.008554	0.000178	0.000189	0.00014	-3.3e-05	0.000282	-0.00125	0.006655	0.002102
1829	-0.025333	-0.030597	-0.027965	0.500515	0.462829	-0.002575	0.008658	0.000165	0.000178	0.000156	-5.4e-05	0.000282	-0.001272	0.006496	0.001991
1830	-0.025081	-0.030909	-0.027995	0.505288	0.45999	-0.002259	0.0087	0.000154	0.00016	0.000171	-7.6e-05	0.000278	-0.001279	0.006235	0.001869
1831	-0.024644	-0.031028	-0.027836	0.509451	0.457747	-0.00197	0.00874	0.000147	0.000141	0.000185	-9.7e-05	0.000271	-0.001268	0.005903	0.001742
1832	-0.024057	-0.031008	-0.0275325	0.513551	0.455334	-0.001638	0.008728	0.000137	0.000118	0.000199	-0.000119	0.000261	-0.001246	0.005499	0.001602
1833	-0.023315	-0.030841	-0.027078	0.517198	0.452958	-0.001304	0.008698	0.000124	0.0001	0.00021	-0.000139	0.000252	-0.001217	0.005081	0.001441
1834	-0.022634	-0.03056	-0.026597	0.520536	0.450486	-0.000939	0.008615	0.000107	7.7e-05	0.000224	-0.000161	0.000245	-0.001192	0.004671	0.00127
1835	-0.021943	-0.030154	-0.0260485	0.523752	0.447743	-0.000595	0.008498	8.9e-05	5.3e-05	0.00024	-0.00018	0.000244	-0.00117	0.00434	0.001112
1836	-0.021152	-0.029504	-0.025328	0.524618	0.447141	-0.000479	0.008437	7.4e-05	4.6e-05	0.000249	-0.000189	0.000242	-0.001135	0.004171	0.000982
1837	-0.02049	-0.028726	-0.024608	0.524239	0.447586	-0.000495	0.008383	6.2e-05	4.9e-05	0.00025	-0.000189	0.000238	-0.001098	0.004103	0.0009
1838	-0.020061	-0.027903	-0.023982	0.523891	0.447746	-0.000482	0.008259	4.6e-05	5e-05	0.000246	-0.000182	0.000234	-0.001073	0.004111	0.000824
1839	-0.019714	-0.026911	-0.0233125	0.521241	0.450174	-0.000748	0.008229	4.1e-05	6.6e-05	0.000229	-0.000163	0.000229	-0.00104	0.004304	0.000794
1840	-0.019469	-0.025911	-0.02269	0.517687	0.453292	-0.001091	0.008223	4e-05	8.5e-05	0.000206	-0.000138	0.000223	-0.00101	0.004579	0.000765
1841	-0.019407	-0.024924	-0.0221655	0.51369	0.456413	-0.001433	0.008217	4.2e-05	0.000103	0.00018	-0.000112	0.000217	-0.000994	0.004887	0.000729
1842	-0.019378	-0.023949	-0.0216635	0.508311	0.460555	-0.001877	0.008277	5.1e-05	0.000125	0.000154	-8.3e-05	0.000211	-0.000983	0.005214	0.000701
1843	-0.019469	-0.023105	-0.021287	0.503157	0.464062	-0.002263	0.008334	6e-05	0.000143	0.000133	-5.8e-05	0.000204	-0.000983	0.005475	0.000665
1844	-0.019675	-0.022412	-0.0210435	0.498265	0.467033	-0.002624	0.008404	7e-05	0.000157	0.000119	-3.7e-05	0.000198	-0.000997	0.005672	0.000636
1845	-0.020007	-0.021927	-0.020967	0.4941	0.469014	-0.002909	0.00845	7.8e-05	0.000163	0.000112	-2.2e-05	0.000192	-0.001027	0.005731	0.000632
1846	-0.020398	-0.021603	-0.0210005	0.489454	0.471302	-0.003167	0.008522	8.7e-05	0.000166	0.000111	-1e-05	0.000182	-0.001065	0.005629	0.000677
1847	-0.020931	-0.021572	-0.0212515	0.486396	0.471709	-0.003309	0.008548	9.3e-05	0.000161	0.000119	-3e-06	0.000173	-0.001109	0.005417	0.000757
1848	-0.021419	-0.021742	-0.0215805	0.48398	0.471391	-0.00337	0.008554	9.7e-05	0.000149	0.000132	0	0.000164	-0.001163	0.005074	0.000872
1849	-0.021934	-0.02211	-0.022022	0.481905	0.470668	-0.003329	0.008542	9.8e-05	0.000132	0.000148	-3e-06	0.000155	-0.001213	0.004641	0.000984
1850	-0.022493	-0.022707	-0.0226	0.481688	0.468221	-0.003156	0.008468	9.5e-05	0.000105	0.000168	-1e-05	0.000147	-0.001262	0.004103	0.001081
1851	-0.023088	-0.023417	-0.0232525	0.482029	0.46548	-0.00289	0.008389	8.8e-05	7.2e-05	0.000192	-2.3e-05	0.00014	-0.001302	0.003476	0.001125
1852	-0.023608	-0.024205	-0.0239065	0.483031	0.462368	-0.002514	0.008278	7.9e-05	3.8e-05	0.000217	-3.9e-05	0.000133	-0.001331	0.002802	0.001083
1853	-0.023994	-0.02496	-0.024477	0.484768	0.458982	-0.002061	0.008159	7e-05	-1e-06	0.000247	-6e-05	0.00013	-0.001354	0.002138	0.000951
1854	-0.024312	-0.025674	-0.024993	0.487913	0.454646	-0.001512	0.008014	5.7e-05	-4.5e-05	0.000285	-8.7e-05	0.000127	-0.001369	0.001535	0.000722
1855	-0.024399	-0.026216	-0.0253075	0.490774	0.450991	-0.000968	0.007886	4.4e-05	-8.6e-05	0.000326	-0.000113	0.000124	-0.001387	0.001017	0.000436
1856	-0.024346	-0.02656	-0.025453	0.493846	0.447423	-0.000419	0.007738	2.5e-05	-0.000126	0.000373	-0.00014	0.000123	-0.00141	0.000618	0.000121
1857	-0.024122	-0.026677	-0.0253995	0.496898	0.444088	8.8e-05	0.007566	2e-06	-0.000163	0.000427	-0.000166	0.000124	-0.001445	0.000358	-0.000164
1858	-0.023604	-0.026504	-0.025054	0.499057	0.441933	0.000461	0.007383	-2.6e-05	-0.000191	0.000481	-0.000183	0.000124	-0.001489	0.000216	-0.000343
1859	-0.022755	-0.026065	-0.02441	0.500519	0.440822	0.000686	0.007166	-5.6e-05	-0.00021	0.000537	-0.000194	0.000125	-0.001538	0.000161	-0.000382
1860	-0.021591	-0.025321	-0.023456	0.500108	0.441895	0.000672	0.006932	-8.4e-05	-0.000217	0.000589	-0.000197	0.000127	-0.001584	0.000185	-0.00025
1861	-0.020178	-0.024486	-0.022332	0.499731	0.443161	0.000593	0.006626	-0.000121	-0.000213	0.000634	-0.00019	0.000127	-0.00162	0.00027	-5.3e-05
1862	-0.018712	-0.023535	-0.0211235	0.499799	0.44419	0.000404	0.006293	-0.000158	-0.000208	0.000675	-0.000183	0.000133	-0.001654	0.000436	0.000237
1863	-0.01705	-0.022296	-0.019673	0.497191	0.447761	4.9e-05	0.005995	-0.000194	-0.000188	0.000698	-0.000169	0.000137	-0.001677	0.00068	0.000526
1864	-0.015359	-0.020907	-0.018133	0.493401	0.452394	-0.000418	0.005753	-0.000223	-0.000166	0.000707	-0.000154	0.000143	-0.001693	0.001021	0.000816
1865	-0.01369	-0.019436	-0.016563	0.488364	0.458123	-0.000927	0.005569	-0.00025	-0.000142	0.000706	-0.000138	0.00015	-0.0017	0.001432	0.001052
1866	-0.012138	-0.017966	-0.015052	0.482648	0.464252	-0.001446	0.005439	-0.000273	-0.00012	0.000696	-0.000122	0.000159	-0.001698	0.001887	0.001239
1867	-0.01072	-0.016475	-0.0135975	0.475745	0.471421	-0.001947	0.005365	-0.000292	-0.000101	0.000681	-0.000109	0.000169	-0.001676	0.002361	0.001349
1868	-0.009514	-0.01517	-0.012342	0.468627	0.478563	-0.002388	0.005331	-0.000306	-8.5e-05	0.000663	-9.9e-05	0.000178	-0.001632	0.00283	0.001387
1869	-0.008555	-0.013995	-0.011275	0.462055	0.484862	-0.002733	0.00529	-0.000318	-7.8e-05	0.00065	-9.3e-05	0.000187	-0.001575	0.003221	0.001389
1870	-0.007721	-0.012776	-0.0102485	0.454399	0.491971	-0.003037	0.005289	-0.000322	-7.6e-05	0.00064	-8.9e-05	0.000193	-0.001503	0.003496	0.001377
1871	-0.007196	-0.011897	-0.0095465	0.450353	0.495103	-0.00315	0.005151	-0.000336	-8.9e-05	0.000644	-9.3e-05	0.000199	-0.001446	0.003598	0.001366
1872	-0.006825	-0.011049	-0.008937	0.446485	0.497852	-0.00322	0.005046	-0.00034	-0.000113	0.000656	-9.9e-05	0.000204	-0.001388	0.003575	0.001393
1873	-0.006599	-0.010405	-0.008502	0.444642	0.498317	-0.003126	0.00484	-0.00035	-0.000148	0.000681	-0.000109	0.000205	-0.001356	0.003306	0.001449
1874	-0.00662	-0.009886	-0.008253	0.445137	0.496265	-0.002902	0.004556	-0.000359	-0.000197	0.00072	-0.000123	0.000207	-0.001338	0.002827	0.001519
1875	-0.006786	-0.00948	-0.008133	0.447236	0.492586	-0.002563	0.004224	-0.000366	-0.000257	0.000775	-0.000141	0.000207	-0.001331	0.002136	0.001561
1876	-0.007045	-0.009072	-0.0080585	0.450691	0.48756	-0.002125	0.003874	-0.000371	-0.000327	0.000842	-0.000162	0.000203	-0.001334	0.001246	0.001564
1877	-0.007386	-0.008698	-0.008042	0.455172	0.481661	-0.001617	0.003521	-0.000372	-0.000403	0.000921	-0.000186	0.000195	-0.001338	0.00024	0.001494
1878	-0.007838	-0.008262	-0.00805	0.460233	0.475423	-0.001075	0.0032	-0.000372	-0.000481	0.001008	-0.000212	0.000183	-0.001345	-0.000762	0.001338
1879	-0.008316	-0.007884	-0.0081	0.465406	0.469442	-0.000511	0.002914	-0.000374	-0.000552	0.001094	-0.000236	0.000167	-0.001363	-0.00165	0.001113
1880	-0.008987	-0.007691	-0.008339	0.470099	0.464409	-1e-05	0.002707	-0.000376	-0.000611	0.001168	-0.000257	0.000149	-0.001392	-0.00226	0.000857
1881	-0.009857	-0.007801	-0.008829	0.474303	0.460467	0.000403	0.002573	-0.00038	-0.000649	0.001219	-0.000271	0.000131	-0.001432	-0.002595	0.000603
1882	-0.010897	-0.008031	-0.009464	0.477533	0.45796	0.000723	0.002498	-0.000388	-0.000665	0.001245	-0.000277	0.000114	-0.001477	-0.002697	0.000354
1883	-0.011976	-0.008596	-0.010286	0.480098	0.456575	0.000899	0.002463	-0.000398	-0.000657	0.001242	-0.000272	9.6e-05	-0.001518	-0.002556	0.000194
1884	-0.013092	-0.009472	-0.011282	0.482293	0.455611	0.001001	0.002393	-0.000414	-0.000629	0.001227	-0.000259	8.1e-05	-0.001552	-0.002299	0.000141
1885	-0.014154	-0.010394	-0.012274	0.483012	0.456031	0.000943	0.002287	-0.000424	-0.000589	0.001201	-0.000238	6.8e-05	-0.001584	-0.001994	0.000239
1886	-0.015123	-0.011297	-0.01321	0.48332	0.456773	0.000756	0.002154	-0.000424	-0.000546	0.001172	-0.000218	5.9e-05	-0.001623	-0.001668	0.000442
1887	-0.015954	-0.01215	-0.014052	0.483562	0.457195	0.000493	0.001987	-0.000419	-0.000504	0.001149	-0.000199	5.7e-05	-0.001663	-0.001428	0.000716
1888	-0.016509	-0.012906	-0.0147075	0.482797	0.458133	0.000176	0.001756	-0.000408	-0.000466	0.001136	-0.000186	6.1e-05	-0.001696	-0.00127	0.000999
1889	-0.016848	-0.013554	-0.015201	0.481297	0.45955	-0.000187	0.001518	-0.000389	-0.000435	0.001128	-0.000177	7.1e-05	-0.001718	-0.001165	0.001288
1890	-0.016992	-0.014113	-0.0155525	0.479094	0.461529	-0.000537	0.001286	-0.000367	-0.00041	0.001121	-0.00017	8.3e-05	-0.001718	-0.001108	0.001545
1891	-0.017065	-0.014669	-0.015867	0.476757	0.463504	-0.000816	0.00105	-0.000345	-0.000392	0.001117	-0.000168	9.8e-05	-0.001701	-0.001096	0.001764
1892	-0.017092	-0.015176	-0.016134	0.473673	0.466135	-0.001005	0.000815	-0.000323	-0.000382	0.001114	-0.00017	0.000113	-0.001661	-0.001109	0.00193
1893	-0.017198	-0.015744	-0.016471	0.471123	0.468148	-0.001088	0.000595	-0.000305	-0.000379	0.001111	-0.000177	0.000128	-0.001597	-0.001148	0.002036
1894	-0.017311	-0.016309	-0.01681	0.469052	0.469801	-0.001057	0.000371	-0.00029	-0.000382	0.001107	-0.000188	0.000143	-0.001517	-0.001222	0.002081
1895	-0.017514	-0.016856	-0.017185	0.467879	0.470538	-0.000903	0.000152	-0.000279	-0.000393	0.001103	-0.000204	0.000159	-0.001434	-0.001353	0.002084
1896	-0.017673	-0.017324	-0.0174985	0.466681	0.471277	-0.000654	-5.5e-05	-0.000273	-0.000413	0.001097	-0.000223	0.000175	-0.001349	-0.001558	0.002027
1897	-0.017817	-0.017724	-0.0177705	0.466986	0.4705	-0.000321	-0.000237	-0.000274	-0.000442	0.001088	-0.000246	0.000191	-0.001267	-0.001891	0.001915
1898	-0.017855	-0.017883	-0.017869	0.466883	0.47027	7.3e-05	-0.000345	-0.000274	-0.000482	0.001068	-0.000268	0.000204	-0.001194	-0.002279	0.001756
1899	-0.017901	-0.018004	-0.0179525	0.469412	0.467387	0.000531	-0.00045	-0.000281	-0.000531	0.001049	-0.000291	0.000215	-0.001133	-0.00279	0.001555
1900	-0.017738	-0.018025	-0.0178815	0.472343	0.464228	0.000993	-0.00048	-0.000291	-0.000587	0.001024	-0.000308	0.000221	-0.001082	-0.003325	0.001302
1901	-0.017376	-0.017786	-0.017581	0.475145	0.461377	0.001424	-0.000431	-0.000303	-0.000646	0.00099	-0.000318	0.000222	-0.001048	-0.003798	0.000987
1902	-0.016804	-0.017492	-0.017148	0.478327	0.458341	0.001785	-0.000282	-0.000319	-0.000702	0.000948	-0.00032	0.000217	-0.001024	-0.004124	0.000608
1903	-0.016187	-0.016979	-0.016583	0.481439	0.455743	0.002056	-5e-05	-0.000335	-0.00075	0.0009	-0.000315	0.000209	-0.001021	-0.00418	0.000157
1904	-0.015464	-0.016381	-0.0159225	0.484181	0.45389	0.002232	0.000265	-0.000353	-0.000781	0.000847	-0.000303	0.000197	-0.001027	-0.003942	-0.00038
1905	-0.014696	-0.01572	-0.015208	0.486454	0.452946	0.002314	0.00064	-0.000379	-0.000794	0.000789	-0.000284	0.000181	-0.001035	-0.00343	-0.000995
1906	-0.013875	-0.01494	-0.0144075	0.487725	0.453501	0.002289	0.001043	-0.000408	-0.000786	0.000728	-0.000262	0.000161	-0.001044	-0.002611	-0.001635
1907	-0.013091	-0.014195	-0.013643	0.4886	0.454692	0.002164	0.001456	-0.000437	-0.000761	0.000667	-0.000239	0.000141	-0.001059	-0.001516	-0.002229
1908	-0.012342	-0.013257	-0.0127995	0.488295	0.457342	0.001946	0.001798	-0.000459	-0.000724	0.000608	-0.000218	0.000124	-0.001086	-0.000311	-0.002675
1909	-0.011603	-0.012356	-0.0119795	0.487635	0.46036	0.001704	0.002012	-0.000475	-0.000682	0.000555	-0.000198	0.00011	-0.001113	0.000795	-0.003003
1910	-0.010925	-0.011475	-0.0112	0.48625	0.463967	0.001458	0.002076	-0.000478	-0.000641	0.000512	-0.000182	0.000102	-0.001142	0.001706	-0.003195
1911	-0.010403	-0.010645	-0.010524	0.484512	0.467859	0.001219	0.001982	-0.000468	-0.0006	0.000477	-0.000171	9.9e-05	-0.001172	0.002381	-0.003247
1912	-0.00995	-0.009872	-0.009911	0.481948	0.47221	0.001026	0.001716	-0.000446	-0.000562	0.000452	-0.000166	0.000102	-0.001193	0.002825	-0.003211
1913	-0.009644	-0.009191	-0.0094175	0.479058	0.476516	0.000881	0.001335	-0.000415	-0.000528	0.000438	-0.000167	0.000108	-0.001205	0.003064	-0.003105
1914	-0.00948	-0.008513	-0.0089965	0.475494	0.481098	0.000841	0.000846	-0.000377	-0.000501	0.00044	-0.000175	0.00012	-0.00121	0.003126	-0.002919
1915	-0.009297	-0.008034	-0.0086655	0.471541	0.48549	0.000914	0.000248	-0.000339	-0.000478	0.000457	-0.000188	0.000134	-0.001195	0.003062	-0.002726
1916	-0.009091	-0.007666	-0.0083785	0.466965	0.490075	0.001103	-0.000378	-0.0003	-0.000458	0.000487	-0.000205	0.000152	-0.001171	0.0029	-0.002484
1917	-0.008955	-0.00747	-0.0082125	0.462668	0.493646	0.001398	-0.001048	-0.000268	-0.00044	0.000528	-0.000226	0.000174	-0.001133	0.00266	-0.002306
1918	-0.008884	-0.007433	-0.0081585	0.458925	0.496092	0.001822	-0.001731	-0.000243	-0.000423	0.000578	-0.000248	0.000199	-0.001091	0.002347	-0.002149
1919	-0.008814	-0.007554	-0.008184	0.455669	0.497518	0.002318	-0.002358	-0.000227	-0.000406	0.000628	-0.00027	0.000222	-0.001036	0.001938	-0.00205
1920	-0.00878	-0.007853	-0.0083165	0.452979	0.49782	0.002824	-0.002879	-0.000219	-0.000394	0.000677	-0.00029	0.000244	-0.000969	0.001416	-0.002001
1921	-0.008783	-0.008361	-0.008572	0.45089	0.496982	0.003349	-0.00326	-0.000219	-0.000393	0.000722	-0.000307	0.000261	-0.000903	0.000819	-0.002004
1922	-0.008867	-0.009089	-0.008978	0.449694	0.494935	0.003823	-0.003493	-0.000223	-0.000405	0.000764	-0.00032	0.000274	-0.000844	0.000184	-0.002025
1923	-0.008993	-0.010012	-0.0095025	0.449359	0.491866	0.004167	-0.003528	-0.00023	-0.000431	0.000797	-0.000328	0.00028	-0.000794	-0.000449	-0.002082
1924	-0.009224	-0.011061	-0.0101425	0.449272	0.488667	0.004362	-0.003336	-0.000241	-0.000469	0.000819	-0.000328	0.000278	-0.000756	-0.001021	-0.002193
1925	-0.009523	-0.012265	-0.010894	0.449727	0.485139	0.004394	-0.002918	-0.000257	-0.000518	0.000829	-0.00032	0.00027	-0.000734	-0.001465	-0.002373
1926	-0.009893	-0.013552	-0.0117225	0.450016	0.482164	0.00426	-0.002254	-0.000279	-0.000568	0.000818	-0.000304	0.000254	-0.000738	-0.001613	-0.002614
1927	-0.010323	-0.014855	-0.012589	0.449895	0.480067	0.003944	-0.001357	-0.000312	-0.000612	0.000785	-0.000279	0.00023	-0.000753	-0.0015	-0.002966
1928	-0.010741	-0.016003	-0.013372	0.448905	0.479339	0.003486	-0.000308	-0.000354	-0.000643	0.000734	-0.000248	0.000201	-0.000759	-0.001168	-0.00338
1929	-0.011124	-0.016969	-0.0140465	0.447398	0.479626	0.002937	0.00081	-0.000403	-0.00066	0.000674	-0.000213	0.000169	-0.000761	-0.000617	-0.003765
1930	-0.011402	-0.017578	-0.01449	0.445104	0.481314	0.002353	0.001853	-0.000451	-0.00066	0.000612	-0.000177	0.000136	-0.000773	0.000131	-0.003992
1931	-0.011595	-0.017939	-0.014767	0.442399	0.483967	0.001764	0.002814	-0.000497	-0.000649	0.000555	-0.000142	0.000104	-0.00082	0.001041	-0.003969
1932	-0.01162	-0.018132	-0.014876	0.440467	0.486284	0.001264	0.003581	-0.000538	-0.000631	0.000514	-0.000111	7.8e-05	-0.000891	0.001926	-0.00373
1933	-0.011544	-0.017916	-0.01473	0.438812	0.489185	0.000835	0.004152	-0.000563	-0.000614	0.00049	-8.3e-05	5.5e-05	-0.00097	0.002607	-0.003245
1934	-0.011363	-0.017403	-0.014383	0.437865	0.492025	0.000515	0.004535	-0.000579	-0.000602	0.000482	-5.9e-05	3.5e-05	-0.001027	0.002973	-0.002735
1935	-0.011128	-0.016795	-0.0139615	0.438266	0.49406	0.000287	0.004781	-0.000588	-0.000596	0.00049	-3.9e-05	1.9e-05	-0.001064	0.003107	-0.002294
1936	-0.010758	-0.016049	-0.0134035	0.440004	0.495219	0.000205	0.004865	-0.00059	-0.000598	0.000514	-2.7e-05	6e-06	-0.001077	0.00308	-0.001996
1937	-0.010343	-0.015332	-0.0128375	0.443509	0.494889	0.000278	0.00478	-0.000586	-0.000607	0.000556	-2.5e-05	-1e-06	-0.001092	0.002929	-0.001766
1938	-0.009854	-0.014662	-0.012258	0.448312	0.493483	0.000507	0.004506	-0.000572	-0.000623	0.000618	-3.2e-05	-5e-06	-0.001107	0.002653	-0.001573
1939	-0.009332	-0.014152	-0.011742	0.45409	0.491092	0.00092	0.004022	-0.00055	-0.000645	0.000703	-4.8e-05	-4e-06	-0.001108	0.002227	-0.001414
1940	-0.008764	-0.013826	-0.011295	0.460618	0.487794	0.001531	0.003262	-0.000518	-0.000672	0.000813	-7e-05	0	-0.001098	0.001601	-0.001211
1941	-0.008129	-0.013675	-0.010902	0.467238	0.484131	0.002343	0.002265	-0.000481	-0.000701	0.000937	-9.8e-05	7e-06	-0.001078	0.000785	-0.000935
1942	-0.00757	-0.013673	-0.0106215	0.473641	0.480357	0.003359	0.001055	-0.000445	-0.000729	0.00107	-0.000128	1.5e-05	-0.001045	-0.000233	-0.000564
1943	-0.007092	-0.01377	-0.010431	0.479426	0.476822	0.004581	-0.000319	-0.000414	-0.00075	0.001198	-0.000155	2.3e-05	-0.001	-0.001437	-9e-05
1944	-0.006823	-0.013975	-0.010399	0.485218	0.472888	0.005935	-0.001745	-0.000393	-0.000761	0.001305	-0.000179	3e-05	-0.000941	-0.002761	0.000431
1945	-0.006888	-0.014216	-0.010552	0.490395	0.469252	0.007245	-0.003049	-0.000379	-0.000758	0.001379	-0.000197	3.7e-05	-0.000877	-0.004107	0.000966
1946	-0.007326	-0.014715	-0.0110205	0.495816	0.465124	0.008392	-0.004116	-0.000375	-0.000745	0.001421	-0.000208	4.3e-05	-0.000801	-0.005376	0.001412
1947	-0.008111	-0.015249	-0.01168	0.500811	0.461236	0.009225	-0.004762	-0.000379	-0.000733	0.001435	-0.000211	4.6e-05	-0.000728	-0.006456	0.001727
1948	-0.009368	-0.015835	-0.0126015	0.50552	0.45761	0.009631	-0.004943	-0.000389	-0.000722	0.001424	-0.000206	4.7e-05	-0.00066	-0.00725	0.001869
1949	-0.011035	-0.01646	-0.0137475	0.510038	0.45407	0.00955	-0.004538	-0.000408	-0.000712	0.001394	-0.000192	4.5e-05	-0.000601	-0.007629	0.00178
1950	-0.012984	-0.017151	-0.0150675	0.513803	0.451141	0.009011	-0.003575	-0.000432	-0.000706	0.001348	-0.00017	3.5e-05	-0.000562	-0.007503	0.001491
1951	-0.015094	-0.017862	-0.016478	0.517106	0.448225	0.008099	-0.002177	-0.000467	-0.000695	0.001288	-0.000141	2.2e-05	-0.000537	-0.006851	0.001026
1952	-0.017126	-0.018558	-0.017842	0.519155	0.445934	0.00691	-0.000427	-0.000506	-0.000676	0.001216	-0.000105	2e-06	-0.000536	-0.005629	0.000415
1953	-0.018883	-0.01925	-0.0190665	0.519475	0.444602	0.005627	0.001392	-0.000544	-0.000649	0.001136	-6.6e-05	-2e-05	-0.000556	-0.004066	-0.000247
1954	-0.020253	-0.019783	-0.020018	0.517496	0.444796	0.004339	0.003079	-0.000574	-0.000624	0.00106	-2.8e-05	-4.3e-05	-0.000596	-0.002434	-0.000786
1955	-0.02129	-0.020241	-0.0207655	0.513841	0.445928	0.003198	0.004411	-0.000592	-0.000602	0.001	4e-06	-6.1e-05	-0.000647	-0.000986	-0.001116
1956	-0.022005	-0.020567	-0.021286	0.508549	0.448278	0.002228	0.005399	-0.000594	-0.000583	0.000954	2.9e-05	-7.6e-05	-0.000698	0.000226	-0.001304
1957	-0.022498	-0.02078	-0.021639	0.503004	0.450644	0.001503	0.006043	-0.000584	-0.000572	0.000923	4.7e-05	-8.6e-05	-0.000735	0.001118	-0.001376
1958	-0.022906	-0.020939	-0.0219225	0.49822	0.452059	0.001078	0.006352	-0.000567	-0.000571	0.00091	5.8e-05	-9.3e-05	-0.000748	0.001696	-0.001378
1959	-0.023164	-0.021049	-0.0221065	0.493944	0.453412	0.000873	0.006472	-0.000541	-0.000581	0.000914	6.1e-05	-0.000101	-0.00075	0.001987	-0.001328
1960	-0.023333	-0.021126	-0.0222295	0.491383	0.453495	0.001	0.006336	-0.000519	-0.0006	0.000934	5.9e-05	-0.000107	-0.000725	0.002126	-0.001347
1961	-0.023395	-0.02103	-0.0222125	0.489279	0.453949	0.001334	0.006068	-0.000488	-0.000632	0.000974	5e-05	-0.000113	-0.000703	0.002099	-0.001372
1962	-0.02332	-0.02076	-0.02204	0.488063	0.454343	0.001932	0.005559	-0.000455	-0.000678	0.001037	3.5e-05	-0.000118	-0.000676	0.001908	-0.001407
1963	-0.023056	-0.020414	-0.021735	0.487391	0.45497	0.002814	0.00476	-0.000421	-0.000731	0.001116	1.5e-05	-0.00012	-0.000643	0.00156	-0.001483
1964	-0.022548	-0.019951	-0.0212495	0.486913	0.456182	0.003982	0.003635	-0.000388	-0.000784	0.001207	-1.2e-05	-0.000116	-0.000609	0.001056	-0.001584
1965	-0.021781	-0.019471	-0.020626	0.486678	0.457638	0.005435	0.002176	-0.000364	-0.000826	0.001305	-4.5e-05	-0.000103	-0.000578	0.00039	-0.001682
1966	-0.020708	-0.018859	-0.0197835	0.486124	0.459606	0.007121	0.000498	-0.000351	-0.000848	0.001396	-8e-05	-8.4e-05	-0.000559	-0.000402	-0.001733
1967	-0.019472	-0.018151	-0.0188115	0.485281	0.461619	0.008918	-0.00123	-0.000345	-0.00084	0.001464	-0.000117	-5.8e-05	-0.000537	-0.001229	-0.001801
1968	-0.018139	-0.017577	-0.017858	0.485256	0.462624	0.010701	-0.002861	-0.000344	-0.000808	0.001503	-0.00015	-3.1e-05	-0.000517	-0.00206	-0.001814
1969	-0.016718	-0.016851	-0.0167845	0.48368	0.464855	0.012263	-0.004141	-0.000337	-0.000765	0.001508	-0.000178	-8e-06	-0.00053	-0.002754	-0.001774
1970	-0.015442	-0.016206	-0.015824	0.483028	0.46568	0.01336	-0.004958	-0.000323	-0.000721	0.001477	-0.000199	9e-06	-0.000531	-0.003124	-0.001854
1971	-0.014341	-0.015615	-0.014978	0.482382	0.46622	0.013871	-0.005279	-0.000308	-0.000685	0.001419	-0.000211	2e-05	-0.000524	-0.003197	-0.00203
1972	-0.013557	-0.015076	-0.0143165	0.48163	0.466615	0.013752	-0.005088	-0.0003	-0.000657	0.001339	-0.000214	2.4e-05	-0.00052	-0.002917	-0.002322
1973	-0.013081	-0.01471	-0.0138955	0.480218	0.467577	0.013007	-0.00437	-0.000315	-0.000638	0.001242	-0.000203	2e-05	-0.000518	-0.002348	-0.00271
1974	-0.013008	-0.01459	-0.013799	0.479476	0.467771	0.011784	-0.003236	-0.000355	-0.000618	0.00113	-0.000182	1.2e-05	-0.000522	-0.001471	-0.003193
1975	-0.013181	-0.014681	-0.013931	0.478284	0.468247	0.01027	-0.001819	-0.00042	-0.000593	0.001013	-0.000151	2e-06	-0.000533	-0.000469	-0.003665
1976	-0.013702	-0.014852	-0.014277	0.476772	0.46857	0.008678	-0.000287	-0.0005	-0.000564	0.000896	-0.000118	-6e-06	-0.000543	0.000545	-0.004156
1977	-0.014281	-0.015167	-0.014724	0.474202	0.469402	0.007191	0.001191	-0.000583	-0.000533	0.00079	-8.5e-05	-1.1e-05	-0.000536	0.001452	-0.004621
1978	-0.014867	-0.015513	-0.01519	0.470747	0.470753	0.005852	0.002526	-0.000656	-0.000505	0.000704	-5.7e-05	-1.6e-05	-0.000522	0.002237	-0.004987
1979	-0.015497	-0.015791	-0.015644	0.467322	0.471685	0.004749	0.003545	-0.000707	-0.00048	0.000639	-3.8e-05	-1.7e-05	-0.000483	0.002848	-0.005322
1980	-0.01586	-0.015911	-0.0158855	0.46229	0.474195	0.00385	0.004288	-0.000733	-0.000466	0.000602	-2.6e-05	-1.8e-05	-0.000436	0.003157	-0.00547
1981	-0.01617	-0.015912	-0.016041	0.458135	0.475908	0.003214	0.004714	-0.000736	-0.000462	0.000586	-2.1e-05	-1.7e-05	-0.000377	0.003231	-0.005547
1982	-0.016423	-0.0157	-0.0160615	0.454579	0.477428	0.002847	0.004844	-0.000715	-0.000471	0.000587	-2.4e-05	-1.6e-05	-0.000315	0.003069	-0.005564
1983	-0.016603	-0.015308	-0.0159555	0.452246	0.478327	0.002758	0.004695	-0.000675	-0.000495	0.000601	-3.1e-05	-1.3e-05	-0.00026	0.002695	-0.005529
1984	-0.016773	-0.014723	-0.015748	0.450969	0.479228	0.002896	0.004356	-0.000622	-0.000529	0.000623	-4.1e-05	-1e-05	-0.000227	0.002204	-0.005466
1985	-0.016866	-0.014052	-0.015459	0.451601	0.479248	0.003334	0.003763	-0.00056	-0.000575	0.000646	-5.2e-05	-7e-06	-0.000198	0.001632	-0.005465
1986	-0.016915	-0.013294	-0.0151045	0.453403	0.479264	0.004046	0.002984	-0.000496	-0.000628	0.00067	-6.2e-05	-5e-06	-0.000187	0.000981	-0.005488
1987	-0.016886	-0.012452	-0.014669	0.456142	0.479332	0.00504	0.002034	-0.000437	-0.000679	0.00069	-7.3e-05	-4e-06	-0.000181	0.000324	-0.005554
1988	-0.016802	-0.011667	-0.0142345	0.460631	0.478531	0.006302	0.000922	-0.000389	-0.000714	0.000701	-8.7e-05	1e-06	-0.000194	-0.000293	-0.005629
1989	-0.016525	-0.010899	-0.013712	0.46486	0.478327	0.007728	-0.000214	-0.000353	-0.000725	0.000698	-0.000101	7e-06	-0.000211	-0.000786	-0.005754
1990	-0.016083	-0.010282	-0.0131825	0.468943	0.478232	0.009269	-0.001338	-0.000317	-0.000704	0.000677	-0.000118	1.6e-05	-0.000226	-0.0011	-0.00593
1991	-0.015441	-0.009842	-0.0126415	0.472899	0.478025	0.01085	-0.002391	-0.000272	-0.000651	0.000636	-0.000136	2.6e-05	-0.000237	-0.001191	-0.006148
1992	-0.014486	-0.009477	-0.0119815	0.474896	0.479142	0.01232	-0.003277	-0.000209	-0.000576	0.000576	-0.000152	3.6e-05	-0.00024	-0.001062	-0.006447
1993	-0.013458	-0.009498	-0.011478	0.477445	0.47944	0.013546	-0.003967	-0.00013	-0.000491	0.000508	-0.000168	4.3e-05	-0.000267	-0.000753	-0.006633
1994	-0.012474	-0.009745	-0.0111095	0.479501	0.479682	0.014427	-0.00444	-3.6e-05	-0.000405	0.000437	-0.000179	4.8e-05	-0.000288	-0.000279	-0.006818
1995	-0.011528	-0.01008	-0.010804	0.480287	0.480794	0.014852	-0.004706	5.3e-05	-0.00033	0.000371	-0.000185	5.1e-05	-0.000307	0.000271	-0.00691
1996	-0.010709	-0.010555	-0.010632	0.48024	0.482431	0.014847	-0.004808	0.000129	-0.000269	0.000313	-0.000185	5.2e-05	-0.000316	0.000835	-0.006922
1997	-0.010121	-0.011103	-0.010612	0.479436	0.484421	0.014377	-0.004751	0.000181	-0.000226	0.000266	-0.000179	5.1e-05	-0.000307	0.001369	-0.006877
[truncated: 8,002 more rows]

## Sheet: geometry trajectory
time	Dist NH---ON	angle	Dist O...Cl
0	1.8846	166.069	4.07744
1	1.886	166.663	4.07856
2	1.8886	167.413	4.08041
3	1.892	168.371	4.08215
4	1.8961	169.382	4.08434
5	1.901	170.478	4.08689
6	1.9065	171.412	4.08865
7	1.913	172.166	4.09074
8	1.9194	172.676	4.09178
9	1.926	172.828	4.09232
10	1.932	172.684	4.09256
11	1.9377	172.156	4.09237
12	1.9427	171.219	4.09181
13	1.9468	170.018	4.09052
14	1.9499	168.744	4.08919
15	1.9517	167.634	4.08696
16	1.9521	166.708	4.08486
17	1.9507	166.09	4.08195
18	1.9484	165.641	4.07891
19	1.9447	165.61	4.07801
20	1.9402	165.891	4.07621
21	1.935	166.442	4.07471
22	1.9306	167.049	4.07395
23	1.9268	167.718	4.07324
24	1.9238	168.385	4.07206
25	1.9224	168.841	4.07166
26	1.9226	169.172	4.07006
27	1.9237	169.341	4.06917
28	1.9262	169.436	4.06833
29	1.9295	169.523	4.06672
30	1.9341	169.697	4.06392
31	1.9396	169.842	4.06076
32	1.9456	170.07	4.05757
33	1.9513	170.283	4.05287
34	1.9572	170.398	4.04735
35	1.9637	170.198	4.04275
36	1.9697	169.839	4.03613
37	1.9755	169.312	4.02951
38	1.9814	168.635	4.02303
39	1.9868	167.943	4.01733
40	1.9911	167.476	4.01039
41	1.9939	167.272	4.00384
42	1.996	167.154	3.99693
43	1.997	167.179	3.99172
44	1.9972	167.383	3.98559
45	1.9969	167.666	3.97985
46	1.996	167.98	3.9733
47	1.9948	168.239	3.96876
48	1.9937	168.414	3.96465
49	1.9928	168.514	3.96012
50	1.9919	168.576	3.9548
51	1.991	168.611	3.95148
52	1.9899	168.698	3.94704
53	1.9879	168.925	3.94307
54	1.9859	169.088	3.93861
55	1.9838	169.341	3.93347
56	1.9816	169.636	3.92755
57	1.98	169.87	3.92252
58	1.9781	170.152	3.91708
59	1.9764	170.476	3.90997
60	1.9751	170.752	3.90542
61	1.9741	170.955	3.89956
62	1.9737	170.938	3.89459
63	1.9739	170.765	3.88998
64	1.9752	170.318	3.8854
65	1.9775	169.722	3.88281
66	1.9804	169.133	3.87982
67	1.9841	168.503	3.87792
68	1.9883	167.887	3.87649
69	1.9927	167.437	3.87494
70	1.9973	166.965	3.87541
71	2.0024	166.391	3.87511
72	2.0076	165.786	3.87512
73	2.0124	165.147	3.87436
74	2.0161	164.601	3.87373
75	2.019	164.026	3.87259
76	2.0209	163.555	3.87025
77	2.0213	163.22	3.86791
78	2.0199	163.082	3.86452
79	2.0173	163.161	3.8613
80	2.0134	163.45	3.85655
81	2.008	164.023	3.85299
82	2.0016	164.75	3.84699
83	1.9955	165.668	3.84218
84	1.9894	166.655	3.83772
85	1.9839	167.612	3.83321
86	1.9796	168.428	3.83025
87	1.9768	168.94	3.82638
88	1.9754	169.173	3.82449
89	1.9758	169.024	3.82135
90	1.9781	168.509	3.81981
91	1.9815	168.036	3.81857
92	1.9858	167.554	3.8156
93	1.9918	166.954	3.81503
94	1.999	166.366	3.81204
95	2.0065	165.784	3.8103
96	2.0148	165.157	3.80738
97	2.0233	164.515	3.80277
98	2.0318	163.823	3.79997
99	2.04	163.113	3.79418
100	2.0467	162.478	3.79058
101	2.0516	161.893	3.785
102	2.0552	161.451	3.77855
103	2.0571	161.174	3.77216
104	2.0571	161.091	3.76548
105	2.0554	161.122	3.75869
106	2.0525	161.283	3.7524
107	2.0486	161.589	3.74606
108	2.0442	162.008	3.73897
109	2.0396	162.456	3.73334
110	2.0353	162.814	3.72871
111	2.0323	163.038	3.72478
112	2.0298	163.138	3.72165
113	2.0285	163.051	3.72018
114	2.0282	162.834	3.71706
115	2.0281	162.584	3.71599
116	2.0283	162.352	3.71499
117	2.0292	162.096	3.71438
118	2.0301	162.027	3.71466
119	2.0311	162.023	3.71489
120	2.0326	162.062	3.7156
121	2.034	162.206	3.71469
122	2.0352	162.445	3.71502
123	2.0358	162.866	3.71295
124	2.036	163.497	3.71213
125	2.0366	164.024	3.71131
126	2.0375	164.53	3.70975
127	2.0379	165.011	3.7094
128	2.0384	165.291	3.70867
129	2.0397	165.292	3.70885
130	2.042	165.013	3.70936
131	2.0445	164.497	3.70988
132	2.0475	163.717	3.7121
133	2.0508	162.801	3.71467
134	2.0541	161.785	3.71729
135	2.0567	160.863	3.72032
136	2.058	160.185	3.72409
137	2.0575	159.794	3.72872
138	2.0555	159.695	3.73382
139	2.0526	159.767	3.73727
140	2.0486	160.109	3.74193
141	2.0437	160.763	3.74579
142	2.0377	161.634	3.74841
143	2.0312	162.704	3.75063
144	2.0245	163.939	3.75326
145	2.0187	165.059	3.75509
146	2.0137	166.136	3.75738
147	2.0095	167.148	3.75915
148	2.006	168.135	3.75934
149	2.0042	168.845	3.76039
150	2.0038	169.308	3.76138
151	2.0055	169.29	3.76237
152	2.0095	168.641	3.76297
153	2.0157	167.437	3.76429
154	2.0244	165.811	3.76608
155	2.036	163.758	3.7678
156	2.0497	161.508	3.76906
157	2.0653	159.19	3.77105
158	2.0812	157.089	3.77304
159	2.0966	155.247	3.77504
160	2.11	153.818	3.77871
161	2.1207	152.833	3.78232
162	2.128	152.234	3.78474
163	2.1314	152.071	3.78718
164	2.1306	152.463	3.78878
165	2.1262	153.277	3.78998
166	2.1188	154.438	3.79126
167	2.109	155.866	3.79125
168	2.0973	157.516	3.79133
169	2.0852	159.196	3.78889
170	2.0733	160.732	3.78645
171	2.062	162.071	3.78241
172	2.052	163.203	3.77943
173	2.0435	164.08	3.77573
174	2.0368	164.665	3.77239
175	2.0328	164.889	3.76894
176	2.0304	164.817	3.76558
177	2.03	164.486	3.7626
178	2.0325	163.767	3.76034
179	2.0382	162.783	3.75781
180	2.0461	161.645	3.75559
181	2.0566	160.253	3.75428
182	2.0694	158.782	3.7521
183	2.0841	157.271	3.75075
184	2.1006	155.678	3.74905
185	2.118	154.202	3.74819
186	2.1344	153.012	3.74528
187	2.1494	152.09	3.74158
188	2.1621	151.445	3.73661
189	2.1715	151.092	3.73217
190	2.178	150.994	3.72638
191	2.1817	151.092	3.71977
192	2.1822	151.402	3.7127
193	2.1806	151.847	3.70446
194	2.1769	152.473	3.69582
195	2.1715	153.209	3.68711
196	2.1653	154.003	3.67729
197	2.1589	154.81	3.67028
198	2.1527	155.606	3.66168
199	2.1468	156.568	3.65395
200	2.1411	157.535	3.64582
201	2.1365	158.495	3.63935
202	2.1327	159.466	3.63373
203	2.13	160.443	3.62769
204	2.1281	161.461	3.62255
205	2.1279	162.365	3.6186
206	2.1287	163.118	3.61457
207	2.1306	163.607	3.61027
208	2.1331	163.87	3.60625
209	2.1365	163.863	3.6035
210	2.1399	163.624	3.59908
211	2.1432	163.167	3.59466
212	2.1464	162.489	3.59025
213	2.1496	161.696	3.58458
214	2.1525	160.748	3.57968
215	2.1543	159.806	3.57563
216	2.1554	158.864	3.5699
217	2.1562	157.949	3.56549
218	2.1561	157.064	3.56143
219	2.1558	156.326	3.55697
220	2.1548	155.793	3.55457
221	2.1534	155.55	3.55185
222	2.1509	155.691	3.54953
223	2.1481	156.103	3.54805
224	2.1452	156.819	3.547
225	2.1428	157.615	3.54552
226	2.1407	158.486	3.54487
227	2.1393	159.293	3.54423
228	2.1386	160.05	3.54451
229	2.1395	160.541	3.54387
230	2.1412	160.803	3.54416
231	2.1439	160.7	3.54353
232	2.1473	160.259	3.54293
233	2.1512	159.47	3.54113
234	2.156	158.317	3.53918
235	2.1612	156.879	3.53723
236	2.1666	155.2	3.53284
237	2.1725	153.36	3.52879
238	2.1788	151.428	3.5239
239	2.1847	149.503	3.51936
240	2.1902	147.645	3.51481
241	2.1956	145.825	3.5095
242	2.1999	144.267	3.50493
243	2.2039	142.863	3.50206
244	2.2058	141.784	3.50087
245	2.2063	140.989	3.50002
246	2.2063	140.436	3.49797
247	2.2046	140.24	3.4993
248	2.202	140.281	3.49902
249	2.1982	140.537	3.50077
250	2.1928	141.068	3.50211
251	2.187	141.805	3.50555
252	2.1805	142.678	3.50699
253	2.1728	143.751	3.51045
254	2.1652	144.872	3.51258
255	2.1571	146.067	3.51445
256	2.1492	147.239	3.51666
257	2.1411	148.344	3.51685
258	2.133	149.378	3.51771
259	2.125	150.362	3.51699
260	2.1175	151.304	3.51626
261	2.1104	152.156	3.51425
262	2.1039	152.945	3.51225
263	2.0982	153.563	3.50991
264	2.0932	154.05	3.50631
265	2.0896	154.256	3.50397
266	2.0875	154.237	3.50248
267	2.0872	153.977	3.50059
268	2.0885	153.614	3.49962
269	2.0917	153.137	3.49751
270	2.0956	152.651	3.49622
271	2.1002	152.137	3.49582
272	2.1047	151.742	3.49585
273	2.1082	151.556	3.49674
274	2.1093	151.73	3.49723
275	2.1087	152.145	3.49729
276	2.106	152.858	3.49773
277	2.101	153.849	3.49727
278	2.094	155.172	3.49688
279	2.0853	156.778	3.49636
280	2.076	158.496	3.49513
281	2.0661	160.298	3.49337
282	2.0567	161.997	3.49004
283	2.0476	163.489	3.48869
284	2.0393	164.583	3.48569
285	2.0325	165.243	3.48364
286	2.0272	165.364	3.48231
287	2.0235	165.023	3.48137
288	2.0217	164.171	3.48053
289	2.022	162.83	3.48047
290	2.0253	160.982	3.47971
291	2.0316	158.856	3.47903
292	2.0406	156.568	3.47992
293	2.0523	154.194	3.48051
294	2.0653	151.94	3.48266
295	2.0783	149.974	3.48271
296	2.0905	148.385	3.48457
297	2.101	147.149	3.48625
298	2.1086	146.434	3.487
299	2.1131	146.161	3.48813
300	2.1151	146.315	3.48888
301	2.1139	146.948	3.48865
302	2.1101	147.935	3.48834
303	2.1036	149.261	3.48785
304	2.0951	150.874	3.4858
305	2.0865	152.498	3.483
306	2.0775	154.192	3.48107
307	2.0697	155.721	3.47577
308	2.0627	157.182	3.4729
309	2.057	158.446	3.46973
310	2.0531	159.395	3.46586
311	2.0503	160.07	3.463
312	2.0491	160.25	3.46032
313	2.0504	159.782	3.45889
314	2.054	158.682	3.45746
315	2.06	156.996	3.45478
316	2.0675	155.132	3.45541
317	2.0759	153.169	3.45447
318	2.0846	151.233	3.45314
319	2.0919	149.56	3.45338
320	2.0972	148.279	3.45332
321	2.0995	147.418	3.45269
322	2.0979	147.032	3.45176
323	2.092	147.231	3.44964
324	2.0821	147.944	3.4469
325	2.0687	149.11	3.44259
326	2.0533	150.608	3.43819
327	2.037	152.303	3.43253
328	2.0206	154.136	3.4272
329	2.0056	155.917	3.41999
330	1.9922	157.646	3.41386
331	1.9811	159.162	3.40665
332	1.9724	160.412	3.39863
333	1.9661	161.3	3.39299
334	1.9623	161.882	3.38546
335	1.9606	162.155	3.3788
336	1.9616	161.946	3.37268
337	1.9647	161.343	3.36742
338	1.9695	160.513	3.36043
339	1.9752	159.511	3.35604
340	1.9812	158.487	3.35127
341	1.9872	157.556	3.34775
342	1.9929	156.761	3.34347
343	1.9974	156.155	3.33925
344	1.9997	155.899	3.33553
345	2	155.926	3.33077
346	1.9979	156.285	3.32705
347	1.994	156.882	3.32187
348	1.9882	157.753	3.31675
349	1.9814	158.717	3.31163
350	1.9734	159.929	3.30477
351	1.965	161.282	3.29699
352	1.9567	162.727	3.29014
353	1.9488	164.157	3.28205
354	1.9423	165.53	3.2741
355	1.9369	166.867	3.26693
356	1.9328	168.065	3.25953
357	1.9304	169.11	3.25095
358	1.9294	169.873	3.2441
359	1.93	170.27	3.23625
360	1.9321	170.27	3.22909
361	1.9346	170.089	3.22317
362	1.9377	169.657	3.21586
363	1.9412	169.023	3.20875
364	1.9453	168.245	3.20319
365	1.9492	167.509	3.19764
366	1.9529	166.796	3.1919
367	1.9569	166.012	3.18464
368	1.9601	165.365	3.1789
369	1.9625	164.824	3.17228
370	1.964	164.559	3.16567
371	1.9647	164.454	3.15873
372	1.9649	164.478	3.15272
373	1.965	164.434	3.14554
374	1.9651	164.421	3.14021
375	1.9653	164.587	3.13401
376	1.9657	164.885	3.1285
377	1.966	165.223	3.12405
378	1.9662	165.722	3.12065
379	1.9661	166.42	3.11694
380	1.9655	167.386	3.11498
381	1.9639	168.589	3.11359
382	1.9614	170.108	3.11288
383	1.9583	171.805	3.11219
384	1.9549	173.808	3.11062
385	1.9513	175.946	3.11019
386	1.9471	178.073	3.10908
387	1.9429	179.077	3.10803
388	1.9381	177.684	3.1057
389	1.9325	176.519	3.10386
390	1.9256	175.98	3.10029
391	1.9173	176.039	3.09586
392	1.9079	176.793	3.09095
393	1.8986	178.079	3.0851
394	1.89	178.127	3.07849
395	1.8831	175.874	3.07179
396	1.8795	172.848	3.06425
397	1.8796	169.488	3.05768
398	1.8836	166.063	3.04986
399	1.8903	162.907	3.04362
400	1.8986	160.178	3.03826
401	1.907	158.155	3.03348
402	1.914	156.833	3.02902
403	1.9182	156.442	3.02599
404	1.92	156.908	3.02425
405	1.9189	158.196	3.02369
406	1.9153	160.242	3.02299
407	1.9101	162.846	3.0226
408	1.9054	165.663	3.02321
409	1.9019	168.248	3.02371
410	1.9002	170.061	3.0238
411	1.8995	170.723	3.0246
412	1.8993	170.434	3.02456
413	1.8988	169.911	3.02437
414	1.8968	169.733	3.02306
415	1.8933	170.165	3.01989
416	1.8891	171.177	3.01702
417	1.885	172.488	3.01401
418	1.8821	173.42	3.01058
419	1.8818	172.719	3.00715
420	1.8853	170.393	3.00416
421	1.8924	167.332	3.0006
422	1.9014	164.287	2.99719
423	1.9119	161.592	2.99564
424	1.9213	159.601	2.99339
425	1.9276	158.616	2.99297
426	1.9299	158.611	2.99399
427	1.9281	159.647	2.99386
428	1.9225	161.6	2.99558
429	1.9145	164.394	2.99702
430	1.9051	167.959	2.99989
431	1.8965	171.766	3.00319
432	1.8901	175.3	3.00577
433	1.8853	177.362	3.00866
434	1.8811	175.933	3.01226
435	1.8771	173.703	3.01615
436	1.873	172.005	3.01919
437	1.868	171.079	3.02179
438	1.861	170.954	3.02314
439	1.8529	171.67	3.02575
440	1.8449	173.035	3.0281
441	1.8375	175.001	3.02972
442	1.8315	177.284	3.03219
443	1.8282	178.775	3.03595
444	1.8282	177.4	3.03972
445	1.8302	175.386	3.04504
446	1.8343	173.657	3.05179
447	1.8393	172.41	3.05766
448	1.8447	171.709	3.06438
449	1.8497	171.6	3.07353
450	1.8547	172.039	3.08323
451	1.8596	172.614	3.09165
452	1.8645	173.048	3.10166
453	1.8702	172.843	3.11167
454	1.8765	171.955	3.12053
455	1.8833	170.485	3.12811
456	1.8903	168.741	3.13633
457	1.8964	167.114	3.14381
458	1.9012	165.707	3.14792
459	1.9044	164.681	3.15148
460	1.9053	164.148	3.15422
461	1.9037	164.066	3.15443
462	1.9005	164.413	3.15485
463	1.8959	165.154	3.15455
464	1.8903	166.229	3.15397
465	1.8846	167.55	3.15289
466	1.8791	168.877	3.15275
467	1.8743	170.236	3.15147
468	1.8697	171.529	3.15129
469	1.8663	172.663	3.15247
470	1.8633	173.745	3.15417
471	1.8611	174.758	3.15671
472	1.8593	175.589	3.15926
473	1.8584	176.098	3.16348
474	1.8583	176.179	3.1676
475	1.8583	175.808	3.17232
476	1.8593	174.979	3.17661
477	1.8609	173.689	3.18202
478	1.8631	172.273	3.18758
479	1.8663	170.71	3.19227
480	1.8703	169.203	3.19573
481	1.875	167.711	3.19925
482	1.8805	166.267	3.20268
483	1.8865	164.9	3.20411
484	1.8922	163.786	3.20472
485	1.898	162.919	3.2049
486	1.904	162.235	3.2047
487	1.9096	161.777	3.20377
488	1.9148	161.619	3.20324
489	1.9184	161.845	3.20307
490	1.9206	162.442	3.20182
491	1.9218	163.29	3.20175
492	1.9223	164.427	3.20225
493	1.9218	165.812	3.20394
494	1.921	167.425	3.20526
495	1.9194	169.231	3.20624
496	1.918	171.074	3.20733
497	1.9162	172.838	3.21086
498	1.9147	174.285	3.2136
499	1.914	174.899	3.21772
500	1.9144	174.275	3.22048
501	1.9161	172.758	3.22336
502	1.9187	170.809	3.22636
503	1.9224	168.802	3.22939
504	1.9269	166.853	3.23151
505	1.9319	164.999	3.23204
506	1.9371	163.365	3.23387
507	1.9421	162.082	3.23316
508	1.9472	161.038	3.23283
509	1.952	160.297	3.23252
510	1.9562	159.862	3.23188
511	1.9596	159.819	3.23126
512	1.9621	160.111	3.23018
513	1.9642	160.669	3.23027
514	1.9656	161.493	3.22874
515	1.9674	162.478	3.22916
516	1.9687	163.706	3.22889
517	1.9699	165.201	3.23012
518	1.9712	166.932	3.23167
519	1.9728	168.733	3.23286
520	1.9753	170.577	3.23485
521	1.9786	172.478	3.23656
522	1.9829	174.418	3.2387
523	1.9885	176.142	3.242
524	1.9953	176.963	3.24322
525	2.0029	176.41	3.24624
526	2.0113	175.034	3.24668
527	2.0205	173.421	3.24701
528	2.0297	171.858	3.24919
529	2.0391	170.415	3.24989
530	2.0484	169.123	3.24947
531	2.057	168.193	3.24898
532	2.0648	167.459	3.24852
533	2.0711	166.9	3.24972
534	2.0766	166.512	3.24937
535	2.0807	166.29	3.24983
536	2.0833	166.252	3.25022
537	2.0842	166.492	3.25132
538	2.0834	167.005	3.25252
539	2.081	167.808	3.25426
540	2.0771	168.942	3.25713
541	2.0728	170.173	3.25896
542	2.0681	171.527	3.26264
543	2.0632	172.923	3.26537
544	2.0585	174.39	3.26812
545	2.0549	175.637	3.27183
546	2.0518	176.29	3.27537
547	2.0496	175.863	3.27946
548	2.0488	174.588	3.28338
549	2.049	172.958	3.28633
550	2.05	171.201	3.28951
551	2.0521	169.422	3.29305
552	2.055	167.827	3.29531
553	2.058	166.468	3.29759
554	2.0602	165.449	3.30139
555	2.0623	164.648	3.30427
556	2.0638	164.183	3.30625
557	2.0651	163.962	3.31029
558	2.0658	163.861	3.31287
559	2.0662	163.901	3.31624
560	2.0659	163.995	3.3213
561	2.065	164.261	3.32731
562	2.0634	164.648	3.33277
563	2.0613	165.164	3.34103
564	2.0592	165.729	3.34873
565	2.0574	166.312	3.35755
566	2.0555	166.896	3.36579
567	2.054	167.418	3.37515
568	2.0527	167.795	3.38503
569	2.0513	168.086	3.39397
570	2.0506	168.207	3.40422
571	2.0501	168.097	3.41332
572	2.0502	167.734	3.42316
573	2.0517	167.099	3.43204
574	2.0535	166.309	3.44093
575	2.056	165.524	3.44924
576	2.0588	164.748	3.45682
577	2.0618	164.041	3.4644
578	2.0646	163.422	3.47177
579	2.0672	163.004	3.48025
580	2.0693	162.707	3.48927
581	2.0705	162.654	3.49718
582	2.0706	162.775	3.50585
583	2.0701	163.073	3.51432
584	2.0693	163.366	3.52263
585	2.0676	163.733	3.53259
586	2.0653	164.187	3.54091
587	2.0619	164.792	3.55127
588	2.0576	165.418	3.56128
589	2.053	166.004	3.57056
590	2.0484	166.459	3.58115
591	2.0439	166.737	3.59119
592	2.0397	166.694	3.59901
593	2.0355	166.356	3.60815
594	2.0318	165.694	3.61656
595	2.029	164.784	3.62423
596	2.0273	163.666	3.63116
597	2.0265	162.374	3.63718
598	2.0274	161.03	3.64376
599	2.0295	159.656	3.64776
600	2.0327	158.25	3.65346
601	2.0372	156.846	3.65933
602	2.0425	155.423	3.66484
603	2.0486	154.043	3.67134
604	2.0557	152.675	3.67688
605	2.0627	151.443	3.68191
606	2.0693	150.339	3.68806
607	2.0756	149.339	3.69475
608	2.0809	148.447	3.7004
609	2.0854	147.624	3.70734
610	2.0891	146.821	3.71465
611	2.0912	146.141	3.72198
612	2.0898	145.78	3.72985
613	2.0857	145.684	3.73734
614	2.0798	145.708	3.74062
615	2.0721	145.91	3.73918
616	2.0624	146.288	3.73829
617	2.0513	146.864	3.73662
618	2.0393	147.577	3.73418
619	2.0265	148.478	3.73288
620	2.0131	149.569	3.73034
621	1.9991	150.992	3.72746
622	1.986	152.655	3.7255
623	1.9727	154.625	3.72219
624	1.9603	156.82	3.71871
625	1.9496	159.195	3.7152
626	1.9405	161.796	3.71327
627	1.9337	164.408	3.71036
628	1.9295	166.955	3.70881
629	1.9272	169.31	3.70669
630	1.927	171.387	3.70458
631	1.9283	173.084	3.70351
632	1.9308	174.234	3.70223
633	1.934	174.678	3.70138
634	1.938	174.339	3.70193
635	1.9422	173.38	3.70251
636	1.9467	171.901	3.70273
637	1.9518	170.149	3.70376
638	1.9574	168.272	3.70324
639	1.9639	166.252	3.70451
640	1.9701	164.238	3.70325
641	1.976	162.304	3.70297
642	1.9819	160.524	3.70253
643	1.9873	158.957	3.70147
644	1.9919	157.706	3.7
645	1.9953	156.826	3.69895
646	1.9974	156.313	3.69809
647	1.9991	155.999	3.69681
648	2.0008	155.821	3.69534
649	2.0034	155.588	3.69424
650	2.0069	155.224	3.69515
651	2.0114	154.719	3.69484
652	2.0173	154.075	3.69534
653	2.0233	153.381	3.69508
654	2.0291	152.749	3.697
655	2.0332	152.267	3.69771
656	2.0356	151.938	3.69986
657	2.0364	151.721	3.70164
658	2.0371	151.464	3.70343
659	2.0368	151.307	3.70582
660	2.0354	151.224	3.70779
661	2.0333	151.175	3.70866
662	2.0301	151.221	3.70949
663	2.0262	151.353	3.70814
664	2.0215	151.631	3.70802
665	2.0149	152.273	3.70706
666	2.0066	153.3	3.70595
667	1.9974	154.614	3.70347
668	1.9867	156.323	3.70078
669	1.9758	158.475	3.69832
670	1.9652	160.903	3.69631
671	1.9559	163.441	3.69321
672	1.9484	166.066	3.6923
673	1.9424	168.667	3.69015
674	1.9386	171.042	3.68822
675	1.9365	172.993	3.68708
676	1.9357	174.477	3.68696
677	1.9355	175.508	3.6867
678	1.9356	176.095	3.68658
679	1.936	176.086	3.68581
680	1.9372	175.448	3.68491
681	1.9391	174.333	3.68495
682	1.9416	172.967	3.68557
683	1.9454	171.543	3.68415
684	1.9496	170.25	3.68339
685	1.9538	169.2	3.68264
686	1.958	168.527	3.68078
687	1.962	168.21	3.67949
688	1.9656	168.314	3.67692
689	1.969	168.941	3.67506
690	1.9721	169.915	3.67124
691	1.9758	171.032	3.66926
692	1.9794	172.305	3.66544
693	1.9835	173.491	3.66287
694	1.9878	174.398	3.65976
695	1.9916	174.918	3.65742
696	1.9948	174.928	3.65406
697	1.9969	174.476	3.65197
698	1.9976	173.639	3.64873
699	1.9977	172.624	3.6455
700	1.9966	171.497	3.6418
701	1.9946	170.421	3.63799
702	1.9915	169.318	3.63638
703	1.9876	168.326	3.63108
704	1.9832	167.599	3.62729
705	1.9782	167.132	3.62153
706	1.973	166.966	3.61613
707	1.9677	167.15	3.61006
708	1.9634	167.49	3.60341
709	1.9596	168.03	3.59655
710	1.9572	168.607	3.58889
711	1.9564	169.041	3.58078
712	1.957	169.343	3.57175
713	1.959	169.575	3.56504
714	1.9616	169.779	3.55694
715	1.9652	169.981	3.54826
716	1.9689	170.296	3.53951
717	1.9724	170.829	3.53256
718	1.9762	171.256	3.5262
719	1.9795	171.481	3.51932
720	1.9831	171.466	3.51384
721	1.986	171.213	3.50835
722	1.9887	170.66	3.50307
723	1.991	169.861	3.49844
724	1.9921	169.155	3.49442
725	1.9927	168.537	3.48907
726	1.9923	168.306	3.4851
727	1.9907	168.431	3.47883
728	1.9879	168.971	3.47533
729	1.9843	169.856	3.4701
730	1.9807	171.072	3.46429
731	1.9777	172.389	3.45834
732	1.976	173.602	3.45232
733	1.9753	174.392	3.44538
734	1.9756	174.624	3.43672
735	1.9764	174.472	3.42899
736	1.9776	174.25	3.42047
737	1.9787	174.16	3.41123
738	1.9796	174.442	3.40192
739	1.9804	174.966	3.39189
740	1.981	175.53	3.38278
741	1.9817	175.733	3.37367
742	1.9827	175.132	3.36318
743	1.9839	173.834	3.35519
744	1.9855	172.212	3.34628
745	1.9868	170.754	3.33737
746	1.9877	169.57	3.32879
747	1.9886	168.656	3.31976
748	1.9888	168.131	3.31237
749	1.9885	168.013	3.3022
750	1.9874	168.433	3.29243
751	1.9862	169.241	3.28115
752	1.9855	170.286	3.27139
753	1.9864	171.17	3.26041
754	1.989	171.577	3.24689
755	1.9935	171.415	3.23532
756	1.9994	170.829	3.22266
757	2.0062	170.003	3.21062
758	2.0131	169.227	3.19829
759	2.0194	168.774	3.18645
760	2.025	168.653	3.17542
761	2.0289	168.889	3.16657
762	2.0311	169.43	3.157
763	2.031	170.474	3.14895
764	2.0298	171.74	3.14047
765	2.0269	173.178	3.13485
766	2.0229	174.579	3.12934
767	2.018	175.835	3.12479
768	2.0119	176.928	3.12176
769	2.0054	177.916	3.12029
770	1.9991	178.628	3.11693
771	1.9937	178.583	3.11489
772	1.9891	177.927	3.11304
773	1.9861	177.015	3.11111
774	1.9844	175.959	3.11008
775	1.9843	174.955	3.10668
776	1.986	173.903	3.10407
777	1.9887	172.948	3.10156
778	1.9925	172.11	3.09798
779	1.9974	171.438	3.0939
780	2.0028	171.014	3.08973
781	2.0074	170.951	3.08644
782	2.0115	171.081	3.08376
783	2.0149	171.393	3.07967
784	2.0169	171.799	3.07857
785	2.0172	172.323	3.07675
786	2.0164	172.899	3.07723
787	2.0143	173.442	3.07689
788	2.0114	173.913	3.07756
789	2.0075	174.297	3.07882
790	2.0028	174.742	3.08168
791	1.9975	175.196	3.08435
792	1.9922	175.441	3.08712
793	1.9872	175.578	3.0906
794	1.983	175.684	3.0927
795	1.9799	175.857	3.09451
796	1.9777	175.978	3.09632
797	1.9768	176.107	3.09782
798	1.9768	176.341	3.09804
799	1.9779	176.697	3.09654
800	1.9801	177.081	3.09435
801	1.9831	177.518	3.09206
802	1.9861	177.938	3.08945
803	1.9897	178.196	3.08755
804	1.9938	178.306	3.08435
805	1.9979	178.407	3.08205
806	2.0016	178.45	3.08025
807	2.0041	178.556	3.07876
808	2.0059	178.648	3.07736
809	2.0062	178.717	3.07826
810	2.005	178.874	3.07906
811	2.0021	179.188	3.07936
812	1.9975	179.573	3.08256
813	1.9919	179.432	3.08436
814	1.9857	178.793	3.08777
815	1.9791	178.026	3.09128
816	1.9725	177.246	3.09528
817	1.9666	176.442	3.09731
818	1.9612	175.699	3.10073
819	1.9565	175.111	3.10395
820	1.9528	174.691	3.10428
821	1.9503	174.373	3.1052
822	1.949	174.252	3.1043
823	1.949	174.217	3.10361
824	1.95	174.3	3.10179
825	1.9519	174.398	3.10008
826	1.9548	174.579	3.09587
827	1.9585	174.724	3.09256
828	1.9623	174.887	3.09006
829	1.966	175.063	3.08814
830	1.9696	175.16	3.08545
831	1.9729	175.438	3.08514
832	1.9761	175.645	3.08405
833	1.9785	176.025	3.08466
834	1.9799	176.428	3.08568
835	1.9806	176.888	3.0871
836	1.9808	177.228	3.09003
837	1.9809	177.419	3.09297
838	1.9807	177.31	3.09672
839	1.9803	176.999	3.09908
840	1.9796	176.618	3.10275
841	1.9783	176.226	3.10512
842	1.9772	175.961	3.10801
843	1.9756	175.8	3.10959
844	1.974	175.734	3.11029
845	1.9721	175.768	3.10938
846	1.9701	175.965	3.10716
847	1.9679	176.279	3.10692
848	1.9653	176.738	3.10522
849	1.9622	177.225	3.10256
850	1.9591	177.554	3.10102
851	1.9555	177.625	3.09837
852	1.9514	177.317	3.09748
853	1.947	176.776	3.09653
854	1.9426	176.172	3.09697
855	1.9385	175.57	3.09617
856	1.9347	174.911	3.09683
857	1.9308	174.333	3.09831
858	1.9269	173.981	3.10125
859	1.9232	173.84	3.10272
860	1.9203	173.853	3.10566
861	1.9179	174.077	3.10656
862	1.9158	174.534	3.1095
863	1.9144	175.087	3.11164
864	1.9141	175.698	3.11245
865	1.9148	176.252	3.1131
866	1.9161	176.668	3.11236
867	1.9174	177.005	3.11146
868	1.9186	177.165	3.11115
869	1.9195	177.285	3.10791
870	1.9198	177.318	3.10555
871	1.9194	177.36	3.10261
872	1.9177	177.458	3.10013
873	1.9152	177.569	3.09656
874	1.9117	177.46	3.09381
875	1.9068	177.157	3.09175
876	1.9007	176.603	3.08992
877	1.8933	175.768	3.08908
878	1.8856	174.699	3.08894
879	1.8772	173.553	3.08977
880	1.8685	172.579	3.0908
881	1.8596	171.776	3.09237
882	1.8514	171.24	3.09369
883	1.8436	170.909	3.09644
884	1.8367	170.744	3.09923
885	1.8304	170.969	3.10206
886	1.8254	171.393	3.10412
887	1.8219	172.024	3.10632
888	1.819	172.575	3.10812
889	1.8173	172.817	3.11004
890	1.8166	172.843	3.11064
891	1.8171	172.427	3.11001
892	1.8186	171.806	3.10999
893	1.8201	171.041	3.10928
894	1.8216	170.097	3.10838
895	1.8227	169.144	3.10693
896	1.8234	168.217	3.10673
897	1.8234	167.33	3.10597
898	1.8225	166.321	3.10507
899	1.8214	165.204	3.10636
900	1.8201	163.978	3.10629
901	1.8185	162.687	3.10686
902	1.8165	161.545	3.10807
903	1.8145	160.577	3.1087
904	1.8119	159.885	3.11135
905	1.8091	159.535	3.11182
906	1.8054	159.647	3.11388
907	1.8011	160.069	3.1142
908	1.7964	160.815	3.11433
909	1.7915	162.006	3.11449
910	1.7862	163.637	3.11307
911	1.7819	165.565	3.11146
912	1.7783	167.631	3.10847
913	1.7754	169.705	3.10607
914	1.7735	171.684	3.10273
915	1.7723	173.378	3.09939
916	1.772	174.629	3.0959
917	1.7724	175.195	3.09319
918	1.7726	174.746	3.09068
919	1.773	173.523	3.08798
920	1.7737	171.715	3.08627
921	1.7749	169.478	3.08597
922	1.7767	167.017	3.08521
923	1.7792	164.479	3.08588
924	1.7816	162.121	3.08814
925	1.7844	159.983	3.08997
926	1.7876	158.108	3.09326
927	1.79	156.743	3.09674
928	1.791	155.913	3.1003
929	1.7902	155.706	3.10585
930	1.788	156.111	3.11137
931	1.7847	157.092	3.11641
932	1.7812	158.497	3.12105
933	1.7776	160.263	3.12522
934	1.775	162.114	3.12889
935	1.774	163.913	3.13274
936	1.7745	165.593	3.134
937	1.7757	166.932	3.13713
938	1.7791	167.813	3.13932
939	1.784	167.968	3.1411
940	1.7905	167.4	3.14279
941	1.7985	166.26	3.14434
942	1.8082	164.712	3.14781
943	1.8194	162.905	3.14922
944	1.8321	160.969	3.15134
945	1.846	159.002	3.15456
946	1.8596	157.292	3.15779
947	1.8732	155.721	3.1612
948	1.8858	154.543	3.16463
949	1.8976	153.692	3.1689
950	1.908	153.27	3.17198
951	1.9164	153.314	3.17631
952	1.9231	153.75	3.17861
953	1.928	154.568	3.18066
954	1.9308	155.788	3.18326
955	1.9326	157.23	3.18286
956	1.9348	158.58	3.18338
957	1.9368	159.848	3.1812
958	1.9395	160.897	3.17994
959	1.9427	161.595	3.17856
960	1.9463	161.916	3.17482
961	1.9507	161.812	3.17275
962	1.956	161.218	3.16957
963	1.9616	160.215	3.16887
964	1.9676	158.913	3.16636
965	1.9737	157.484	3.16497
966	1.9805	155.956	3.16471
967	1.9871	154.483	3.16535
968	1.9931	153.199	3.16659
969	1.9982	152.247	3.16783
970	2.0024	151.53	3.17057
971	2.0056	151.103	3.17362
972	2.0086	150.948	3.17735
973	2.0115	150.95	3.1821
974	2.0153	151.006	3.18617
975	2.0199	151.073	3.19061
976	2.0245	151.291	3.1949
977	2.0299	151.491	3.19837
978	2.036	151.676	3.20136
979	2.0432	151.838	3.20538
980	2.0514	151.996	3.20806
981	2.0608	151.991	3.20975
982	2.0713	151.88	3.2101
983	2.0832	151.591	3.21164
984	2.0956	151.304	3.21166
985	2.1083	150.876	3.21203
986	2.1209	150.474	3.21359
987	2.1329	150.067	3.21565
988	2.1438	149.738	3.21943
989	2.1532	149.543	3.22254
990	2.1611	149.51	3.22581
991	2.167	149.673	3.23066
992	2.1706	150.086	3.23633
993	2.1719	150.79	3.24323
994	2.1711	151.737	3.24875
995	2.1696	152.77	3.25466
996	2.1675	153.812	3.26241
997	2.1646	154.922	3.2678
998	2.1617	155.905	3.27521
999	2.159	156.708	3.27955
1000	2.1567	157.296	3.28353
1001	2.155	157.639	3.2875
1002	2.1537	157.728	3.28976
1003	2.1532	157.575	3.29244
1004	2.1534	157.201	3.29362
1005	2.1552	156.454	3.29441
1006	2.1579	155.455	3.29569
1007	2.1613	154.349	3.29579
1008	2.1648	153.327	3.29552
1009	2.1689	152.297	3.29562
1010	2.1723	151.437	3.29659
1011	2.1757	150.647	3.2982
1012	2.1795	149.896	3.29869
1013	2.1839	149.167	3.30052
1014	2.1883	148.533	3.30203
1015	2.192	148.085	3.30525
1016	2.1952	147.763	3.3081
1017	2.1972	147.647	3.31084
1018	2.1992	147.51	3.31256
1019	2.2011	147.34	3.31627
1020	2.2025	147.202	3.31881
1021	2.2039	146.985	3.31983
1022	2.2053	146.696	3.3215
1023	2.2065	146.286	3.32404
1024	2.2063	145.934	3.32534
1025	2.2051	145.551	3.32546
1026	2.2027	145.177	3.32522
1027	2.2005	144.801	3.32481
1028	2.197	144.455	3.32458
1029	2.193	144.155	3.32398
1030	2.1881	143.972	3.32327
1031	2.1824	143.951	3.3244
1032	2.1762	144.082	3.32504
1033	2.1698	144.315	3.32654
1034	2.1625	144.735	3.32821
1035	2.1556	145.187	3.33143
1036	2.15	145.629	3.33398
1037	2.1442	146.193	3.3372
1038	2.1383	146.81	3.34078
1039	2.1329	147.419	3.34302
1040	2.1285	147.905	3.34795
1041	2.1246	148.307	3.35087
1042	2.1205	148.713	3.35311
1043	2.1163	149.001	3.35536
1044	2.1122	149.125	3.35781
1045	2.1086	148.993	3.35916
1046	2.1052	148.622	3.36059
1047	2.1017	148.06	3.36053
1048	2.0973	147.449	3.35993
1049	2.0926	146.794	3.35871
1050	2.087	146.191	3.35672
1051	2.0813	145.633	3.35596
1052	2.0746	145.184	3.35473
1053	2.0672	144.878	3.35314
1054	2.0587	144.789	3.35304
1055	2.0503	144.838	3.35361
1056	2.0413	145.15	3.35334
1057	2.0327	145.601	3.35662
1058	2.0256	146.047	3.36014
1059	2.0194	146.654	3.36309
1060	2.0136	147.367	3.36717
1061	2.0091	148.066	3.37099
1062	2.0057	148.716	3.37655
1063	2.0038	149.289	3.37994
1064	2.0024	149.81	3.38311
1065	2.0012	150.327	3.38679
1066	2.0002	150.737	3.38997
1067	1.9993	150.992	3.39357
1068	1.9984	151.071	3.39572
1069	1.997	150.991	3.39799
1070	1.995	150.729	3.39957
1071	1.9926	150.365	3.40066
1072	1.9899	149.814	3.40093
1073	1.9875	149.058	3.40193
1074	1.9843	148.283	3.40339
1075	1.9818	147.389	3.4051
1076	1.9792	146.451	3.40632
1077	1.9768	145.53	3.41005
1078	1.9738	144.779	3.41255
1079	1.971	144.139	3.41565
1080	1.9687	143.597	3.41992
1081	1.9657	143.284	3.42396
1082	1.9628	143.116	3.42968
1083	1.9599	143.13	3.4348
1084	1.9568	143.261	3.44006
1085	1.9542	143.451	3.44569
1086	1.952	143.732	3.45026
1087	1.9509	143.975	3.45485
1088	1.9493	144.315	3.45909
1089	1.9471	144.82	3.46274
1090	1.9453	145.294	3.46423
1091	1.9441	145.693	3.4668
1092	1.9431	145.969	3.46793
1093	1.9427	146.017	3.4687
1094	1.9424	145.974	3.47018
1095	1.9427	145.787	3.47096
1096	1.9448	145.353	3.47151
1097	1.9476	144.755	3.47268
1098	1.9498	144.171	3.47517
1099	1.9517	143.595	3.47698
1100	1.9532	143.091	3.48034
1101	1.9538	142.694	3.48325
1102	1.9538	142.43	3.48761
1103	1.9534	142.281	3.49139
1104	1.9517	142.309	3.49616
1105	1.9491	142.518	3.50125
1106	1.9451	142.964	3.50648
1107	1.9398	143.596	3.51094
1108	1.9333	144.403	3.51477
1109	1.9251	145.482	3.51903
1110	1.916	146.649	3.5201
1111	1.906	147.915	3.52182
1112	1.8956	149.183	3.52169
1113	1.8852	150.387	3.5205
1114	1.8745	151.561	3.5191
1115	1.8645	152.529	3.51739
1116	1.8554	153.27	3.51587
1117	1.8471	153.777	3.51506
1118	1.8398	153.979	3.51342
1119	1.8334	153.891	3.51351
1120	1.8277	153.619	3.51354
1121	1.8246	153.004	3.51528
1122	1.823	152.144	3.5174
1123	1.8229	151.191	3.52184
1124	1.8238	150.229	3.52471
1125	1.8254	149.289	3.53051
1126	1.8278	148.46	3.53608
1127	1.8307	147.816	3.54311
1128	1.8336	147.466	3.54835
1129	1.8369	147.274	3.55553
1130	1.8397	147.381	3.56163
1131	1.8421	147.722	3.56822
1132	1.8437	148.325	3.57457
1133	1.8447	149.206	3.57969
1134	1.8448	150.299	3.58373
1135	1.8446	151.5	3.58544
1136	1.8445	152.717	3.58784
1137	1.8444	153.882	3.58831
1138	1.8442	155.021	3.58877
1139	1.8441	156.016	3.58909
1140	1.8436	156.846	3.58723
1141	1.8422	157.548	3.58622
1142	1.8405	158.097	3.58475
1143	1.8387	158.453	3.58475
1144	1.8369	158.54	3.58545
1145	1.8354	158.446	3.58583
1146	1.834	158.222	3.58754
1147	1.833	157.856	3.58939
1148	1.8335	157.326	3.59149
1149	1.8357	156.645	3.59327
1150	1.8393	155.912	3.59576
1151	1.8435	155.251	3.59779
1152	1.8478	154.701	3.59936
1153	1.852	154.386	3.6021
1154	1.8557	154.32	3.60203
1155	1.8587	154.488	3.60158
1156	1.8612	154.849	3.60026
1157	1.8636	155.388	3.59754
1158	1.866	156.016	3.59241
1159	1.8683	156.726	3.5858
1160	1.8702	157.469	3.5792
1161	1.8719	158.131	3.57121
1162	1.8737	158.787	3.56339
1163	1.8752	159.367	3.55365
1164	1.8763	159.873	3.54634
1165	1.8771	160.261	3.53771
1166	1.8778	160.577	3.53079
1167	1.8787	160.865	3.52459
1168	1.8795	161.13	3.51855
1169	1.8803	161.333	3.5131
1170	1.8807	161.561	3.50874
1171	1.8819	161.814	3.50546
1172	1.8836	162.161	3.50303
1173	1.8861	162.569	3.49988
1174	1.8892	162.984	3.49744
1175	1.8933	163.417	3.49646
1176	1.8987	163.798	3.4951
1177	1.9046	164.228	3.49328
1178	1.9115	164.536	3.48977
1179	1.9184	164.737	3.48725
1180	1.9255	164.969	3.48426
1181	1.9328	165.124	3.48118
1182	1.94	165.183	3.47764
1183	1.9471	165.21	3.47281
1184	1.9535	165.2	3.46813
1185	1.9593	165.075	3.46407
1186	1.9639	164.933	3.4598
1187	1.9672	164.937	3.45662
1188	1.9683	165.086	3.45429
1189	1.9687	165.257	3.45074
1190	1.9681	165.436	3.44879
1191	1.9666	165.692	3.44715
1192	1.9642	166.069	3.44552
1193	1.9615	166.466	3.44397
1194	1.9589	166.879	3.4427
1195	1.9569	167.253	3.44193
1196	1.9559	167.54	3.44012
1197	1.9552	167.884	3.43853
1198	1.9552	168.284	3.43645
1199	1.9566	168.585	3.43348
1200	1.9595	168.822	3.42947
1201	1.9639	168.84	3.42478
1202	1.9692	168.727	3.42015
1203	1.9754	168.497	3.41338
1204	1.9829	168.059	3.40628
1205	1.9912	167.545	3.39802
1206	1.9996	166.992	3.3906
1207	2.0082	166.457	3.38372
1208	2.0159	166.01	3.37471
1209	2.0234	165.779	3.36811
1210	2.0296	165.833	3.36075
1211	2.0339	166.215	3.35366
1212	2.0366	166.885	3.34843
1213	2.0379	167.857	3.34298
1214	2.0385	169.057	3.33858
1215	2.0387	170.46	3.3345
1216	2.039	171.878	3.33015
1217	2.0395	173.362	3.32657
1218	2.0402	174.881	3.32356
1219	2.041	176.305	3.31895
1220	2.0426	177.456	3.31513
1221	2.0443	178.261	3.31078
1222	2.0464	178.573	3.30561
1223	2.0486	178.465	3.29963
1224	2.051	178.205	3.29308
1225	2.0535	177.797	3.28573
1226	2.0561	177.189	3.27783
1227	2.0585	176.418	3.27045
1228	2.0614	175.452	3.26259
1229	2.0648	174.308	3.25551
1230	2.0684	173.147	3.2477
1231	2.0724	172.006	3.24098
1232	2.0763	171.079	3.23592
1233	2.0797	170.408	3.23247
1234	2.0824	170.013	3.22799
1235	2.0841	169.938	3.22727
1236	2.085	170.135	3.2261
1237	2.0847	170.649	3.22647
1238	2.0839	171.337	3.22714
1239	2.0825	172.275	3.22864
1240	2.0808	173.31	3.23038
1241	2.0794	174.196	3.23347
1242	2.0788	174.729	3.2347
1243	2.0786	174.626	3.23722
1244	2.0796	174.001	3.23811
1245	2.0809	173.209	3.23789
1246	2.0825	172.527	3.23664
1247	2.0841	171.919	3.23562
1248	2.0848	171.511	3.23298
1249	2.0849	171.262	3.2303
1250	2.0843	171.213	3.22764
1251	2.084	171.14	3.22373
1252	2.0835	171.043	3.22192
1253	2.0829	170.635	3.21935
1254	2.0831	169.997	3.2168
1255	2.0834	169.16	3.2168
1256	2.0838	168.195	3.21567
1257	2.0839	167.151	3.21699
1258	2.0838	166.035	3.21857
1259	2.0831	165.03	3.2213
1260	2.0818	164.298	3.22485
1261	2.0793	163.668	3.22969
1262	2.0758	163.353	3.23509
1263	2.0717	163.233	3.24049
1264	2.0671	163.378	3.24434
1265	2.062	163.771	3.24896
1266	2.0567	164.364	3.25277
1267	2.0507	165.082	3.25568
1268	2.0445	165.772	3.25467
1269	2.0382	166.514	3.25309
1270	2.0317	167.326	3.24984
1271	2.0256	167.964	3.24724
1272	2.0203	168.499	3.24241
1273	2.0157	169.014	3.23896
1274	2.0115	169.447	3.23487
1275	2.0079	169.787	3.23171
1276	2.0046	170.179	3.22968
1277	2.0017	170.62	3.22827
1278	1.9992	171.013	3.22784
1279	1.9972	171.282	3.22808
1280	1.9967	171.115	3.23157
1281	1.9967	170.608	3.23446
1282	1.9987	169.613	3.23799
1283	2.0019	168.306	3.24415
1284	2.0065	166.767	3.2512
1285	2.0114	165.202	3.25953
1286	2.0165	163.809	3.26742
1287	2.022	162.596	3.27446
1288	2.0262	161.757	3.28217
1289	2.028	161.435	3.28726
1290	2.0276	161.627	3.29277
1291	2.0254	162.188	3.29696
1292	2.0207	163.299	3.30009
1293	2.0142	164.769	3.30144
1294	2.0065	166.539	3.30173
1295	1.9984	168.347	3.30094
1296	1.9895	170.265	3.29974
1297	1.9807	172.01	3.29855
1298	1.9726	173.504	3.29675
1299	1.9649	174.666	3.29625
1300	1.9577	175.471	3.29471
1301	1.9511	175.781	3.29448
1302	1.945	175.685	3.29425
1303	1.9398	175.24	3.29489
1304	1.9361	174.281	3.29747
1305	1.934	172.839	3.30069
1306	1.934	171.155	3.3052
1307	1.9359	169.417	3.30995
1308	1.9393	167.647	3.31363
1309	1.9436	166.039	3.3184
1310	1.9489	164.583	3.32318
1311	1.9535	163.495	3.32709
1312	1.9575	162.803	3.33163
1313	1.96	162.567	3.33362
1314	1.9598	162.876	3.3358
1315	1.9573	163.636	3.33712
1316	1.9528	164.776	3.3365
1317	1.946	166.292	3.33628
1318	1.9383	168.001	3.33631
1319	1.9301	169.751	3.33524
1320	1.9215	171.423	3.33548
1321	1.9133	172.794	3.33571
1322	1.9058	173.809	3.33662
1323	1.8995	174.367	3.33832
1324	1.8939	174.609	3.3407
1325	1.8893	174.496	3.34474
1326	1.8858	174.026	3.34967
1327	1.8837	173.305	3.35499
1328	1.8833	172.349	3.36267
1329	1.885	171.151	3.36885
1330	1.8887	169.863	3.37739
1331	1.8938	168.48	3.38377
1332	1.9004	167.135	3.38997
1333	1.9074	166.04	3.39105
1334	1.9149	165.164	3.39104
1335	1.9219	164.581	3.39164
1336	1.9282	164.295	3.392
1337	1.9333	164.21	3.39149
1338	1.9371	164.346	3.38976
1339	1.94	164.487	3.38839
1340	1.9418	164.734	3.38591
1341	1.943	164.903	3.38455
1342	1.9433	164.994	3.38207
1343	1.9435	164.831	3.37998
1344	1.9444	164.376	3.37738
1345	1.9458	163.658	3.37454
1346	1.9483	162.712	3.37269
1347	1.9515	161.488	3.3722
1348	1.9559	160.119	3.37194
1349	1.9616	158.705	3.37294
1350	1.9681	157.382	3.3738
1351	1.9746	156.369	3.37492
1352	1.9812	155.652	3.37715
1353	1.9872	155.244	3.3784
1354	1.9918	155.264	3.38064
1355	1.9957	155.664	3.38277
1356	1.9984	156.449	3.38415
1357	2	157.667	3.38504
1358	2.0009	159.085	3.38407
1359	2.0014	160.548	3.38335
1360	2.0021	161.884	3.38212
1361	2.0028	163.064	3.37941
1362	2.0042	163.791	3.37535
1363	2.0059	163.899	3.37266
1364	2.0088	163.442	3.36998
1365	2.0129	162.29	3.36731
1366	2.0183	160.618	3.36403
1367	2.0264	158.398	3.36197
1368	2.0369	155.883	3.36091
1369	2.0498	153.106	3.36044
1370	2.0656	150.244	3.36144
1371	2.0823	147.563	3.3627
1372	2.0986	145.217	3.36455
1373	2.1133	143.366	3.36788
1374	2.1248	142.178	3.37195
1375	2.1323	141.747	3.3754
1376	2.1356	142.025	3.3788
1377	2.1352	142.965	3.37511
1378	2.1298	144.678	3.37331
1379	2.1212	146.937	3.37006
1380	2.1111	149.615	3.36613
1381	2.1015	152.505	3.36212
1382	2.093	155.36	3.35634
1383	2.0866	157.973	3.35025
1384	2.0827	160.122	3.34488
1385	2.081	161.624	3.33822
1386	2.0815	162.402	3.33247
1387	2.0843	162.398	3.326
1388	2.0895	161.615	3.32025
1389	2.0978	160.056	3.31447
1390	2.1098	157.831	3.30929
1391	2.1251	155.117	3.3059
1392	2.1434	152.179	3.3028
1393	2.1641	149.234	3.29929
1394	2.1852	146.56	3.29857
1395	2.2059	144.256	3.29785
1396	2.2232	142.562	3.29832
1397	2.237	141.454	3.2984
1398	2.2461	141.006	3.29887
1399	2.25	141.24	3.30115
1400	2.2495	142.118	3.30304
1401	2.245	143.534	3.30353
1402	2.2372	145.447	3.30502
1403	2.2271	147.749	3.30492
1404	2.2159	150.257	3.30412
1405	2.2039	152.812	3.30363
1406	2.1922	155.363	3.30276
1407	2.1817	157.552	3.30221
1408	2.173	159.333	3.30136
1409	2.1658	160.641	3.30136
1410	2.1601	161.382	3.30118
1411	2.1565	161.499	3.30172
1412	2.1554	160.994	3.30275
1413	2.1562	160.065	3.3053
1414	2.159	158.766	3.30814
1415	2.1645	157.167	3.31256
1416	2.1733	155.263	3.31678
1417	2.1855	153.188	3.32155
1418	2.1997	151.152	3.3268
1419	2.2146	149.304	3.3328
1420	2.2301	147.595	3.33791
1421	2.2459	146.109	3.34391
1422	2.2615	144.773	3.34957
1423	2.2768	143.566	3.35592
1424	2.2903	142.659	3.36171
1425	2.3023	141.989	3.36542
1426	2.3113	141.592	3.36925
1427	2.3164	141.543	3.37134
1428	2.3179	141.791	3.37202
1429	2.317	142.215	3.37293
1430	2.3141	142.76	3.37397
1431	2.3103	143.443	3.37373
1432	2.3058	144.205	3.37376
1433	2.3017	144.973	3.37509
1434	2.2985	145.725	3.37576
1435	2.2968	146.406	3.3771
1436	2.297	147.013	3.37978
1437	2.2996	147.431	3.38192
1438	2.3052	147.663	3.38607
1439	2.314	147.581	3.39063
1440	2.3257	147.218	3.39595
1441	2.34	146.596	3.40342
1442	2.3568	145.698	3.41112
1443	2.3769	144.475	3.41747
1444	2.3989	142.983	3.42085
1445	2.4224	141.332	3.42257
1446	2.4463	139.619	3.42265
1447	2.4691	137.926	3.42029
1448	2.4904	136.295	3.41708
1449	2.509	134.77	3.41097
1450	2.5251	133.374	3.40242
1451	2.5366	132.29	3.39177
1452	2.5435	131.528	3.38071
1453	2.5455	131.179	3.36759
1454	2.5432	131.182	3.35239
1455	2.5367	131.57	3.33804
1456	2.527	132.305	3.32449
1457	2.5158	133.292	3.31095
1458	2.5033	134.54	3.29949
1459	2.4903	135.981	3.28884
1460	2.4775	137.501	3.27942
1461	2.4668	138.982	3.27245
1462	2.4585	140.355	3.26674
1463	2.454	141.46	3.26431
1464	2.4534	142.231	3.26146
1465	2.4574	142.527	3.26067
1466	2.4657	142.377	3.2607
1467	2.4774	141.824	3.26195
1468	2.4922	140.925	3.26404
1469	2.5094	139.751	3.26572
1470	2.5278	138.369	3.2662
1471	2.5464	136.931	3.26706
1472	2.5645	135.527	3.26631
1473	2.5802	134.29	3.26352
1474	2.5927	133.342	3.25871
1475	2.602	132.68	3.25187
1476	2.6073	132.381	3.24504
1477	2.6089	132.469	3.23738
1478	2.6066	132.9	3.22897
1479	2.601	133.716	3.22134
1480	2.5934	134.827	3.21371
1481	2.584	136.181	3.20769
1482	2.5735	137.755	3.20247
1483	2.5632	139.483	3.19936
1484	2.5536	141.284	3.1974
1485	2.5448	143.102	3.1959
1486	2.5379	144.826	3.19599
1487	2.533	146.382	3.19811
1488	2.5313	147.549	3.20065
1489	2.5332	148.277	3.20403
1490	2.5372	148.636	3.2074
1491	2.5435	148.567	3.21164
1492	2.5518	148.107	3.21628
1493	2.5616	147.287	3.21974
1494	2.5731	146.172	3.22234
1495	2.5851	144.931	3.22537
1496	2.597	143.604	3.22602
1497	2.6103	142.129	3.22669
1498	2.6235	140.707	3.22653
1499	2.6367	139.407	3.2256
1500	2.6497	138.279	3.22389
1501	2.6617	137.366	3.22219
1502	2.6732	136.607	3.22092
1503	2.6848	135.998	3.22003
1504	2.6948	135.687	3.21957
1505	2.703	135.706	3.21995
1506	2.7093	136.052	3.22111
1507	2.714	136.697	3.22307
1508	2.7167	137.666	3.22549
1509	2.7188	138.761	3.22871
1510	2.7208	139.917	3.23271
1511	2.7215	141.192	3.23667
1512	2.7216	142.446	3.24021
1513	2.7221	143.6	3.24371
1514	2.7233	144.506	3.24524
1515	2.7253	145.103	3.24458
1516	2.7288	145.233	3.24446
1517	2.7334	144.953	3.24061
1518	2.7387	144.262	3.2351
1519	2.7457	143.082	3.22886
1520	2.7551	141.438	3.22174
1521	2.7664	139.399	3.21229
1522	2.7788	137.163	3.20279
1523	2.7917	134.831	3.19261
1524	2.8045	132.612	3.18401
1525	2.8162	130.522	3.17467
1526	2.827	128.603	3.16753
1527	2.8351	127.068	3.16195
1528	2.8401	125.931	3.15687
1529	2.8407	125.293	3.15382
1530	2.8363	125.245	3.15277
1531	2.8272	125.742	3.15203
1532	2.8139	126.784	3.15498
1533	2.797	128.339	3.15747
1534	2.7788	130.226	3.16045
1535	2.7604	132.355	3.16465
1536	2.7437	134.556	3.16961
1537	2.728	136.819	3.17411
1538	2.7156	138.939	3.17834
1539	2.7077	140.755	3.18211
1540	2.7042	142.103	3.18419
1541	2.7048	142.952	3.18675
1542	2.7092	143.294	3.18642
1543	2.718	143.088	3.18703
1544	2.7311	142.295	3.1855
1545	2.7482	140.969	3.18323
1546	2.7704	139.078	3.18123
1547	2.7965	136.823	3.17852
1548	2.8243	134.474	3.17728
1549	2.8521	132.197	3.17654
1550	2.8777	130.28	3.17607
1551	2.8992	128.829	3.17587
1552	2.9139	128.008	3.17836
1553	2.9214	127.882	3.1799
1554	2.9228	128.328	3.18296
1555	2.9175	129.421	3.18772
1556	2.9065	131.112	3.19254
1557	2.8914	133.266	3.19813
1558	2.8748	135.646	3.203
1559	2.8587	138.058	3.20767
1560	2.8447	140.311	3.21186
1561	2.8329	142.319	3.21292
1562	2.8242	143.963	3.21445
1563	2.8179	145.209	3.21381
1564	2.8142	146.038	3.21189
1565	2.8133	146.346	3.20933
1566	2.8155	146.19	3.20555
1567	2.8207	145.607	3.20232
1568	2.8291	144.562	3.19892
1569	2.8397	143.231	3.19479
1570	2.852	141.742	3.19068
1571	2.8661	140.162	3.18714
1572	2.8817	138.524	3.18623
1573	2.8965	137.119	3.18491
1574	2.91	136.028	3.18488
1575	2.9209	135.309	3.18719
1576	2.9285	135.058	3.1899
1577	2.9321	135.302	3.19397
1578	2.9322	136.001	3.19964
1579	2.9297	137.054	3.20561
1580	2.9254	138.346	3.21202
1581	2.92	139.792	3.2162
1582	2.9144	141.31	3.22238
1583	2.9085	142.802	3.22615
1584	2.9033	144.116	3.23062
1585	2.8989	145.216	3.23398
1586	2.8965	145.908	3.23579
1587	2.8952	146.288	3.23718
1588	2.896	146.297	3.23743
1589	2.8972	146.077	3.23741
1590	2.9	145.57	3.23854
1591	2.9039	144.834	3.23885
1592	2.9088	143.95	3.24044
1593	2.9138	143.102	3.24231
1594	2.9183	142.369	3.24519
1595	2.9222	141.802	3.25048
1596	2.9252	141.424	3.25548
1597	2.9275	141.206	3.26219
1598	2.9292	141.126	3.27004
1599	2.9308	141.157	3.2793
1600	2.9342	141.052	3.28812
1601	2.9383	140.917	3.29864
1602	2.9434	140.766	3.30835
1603	2.9495	140.517	3.31908
1604	2.9557	140.208	3.32742
1605	2.9633	139.743	3.3354
1606	2.9708	139.233	3.34076
1607	2.9776	138.703	3.34364
1608	2.9836	138.152	3.34494
1609	2.9884	137.584	3.34415
1610	2.9914	137.057	3.34207
1611	2.9926	136.633	3.33883
1612	2.992	136.35	3.33492
1613	2.99	136.222	3.33016
1614	2.987	136.225	3.32511
1615	2.982	136.474	3.32177
1616	2.9752	136.942	3.31729
1617	2.9675	137.605	3.31486
1618	2.9591	138.413	3.31209
1619	2.9506	139.383	3.31148
1620	2.9425	140.446	3.31147
1621	2.9339	141.646	3.31229
1622	2.9268	142.814	3.31449
1623	2.9211	143.858	3.31564
1624	2.9173	144.776	3.31936
1625	2.9152	145.504	3.32245
1626	2.9156	145.892	3.32739
1627	2.9183	145.951	3.33076
1628	2.9233	145.707	3.33563
1629	2.9298	145.235	3.33762
1630	2.9372	144.519	3.34013
1631	2.9454	143.613	3.34144
1632	2.9544	142.556	3.34146
1633	2.9634	141.445	3.34074
1634	2.9722	140.36	3.34055
1635	2.9795	139.404	3.33866
1636	2.9851	138.616	3.33621
1637	2.9883	138.046	3.33557
1638	2.9891	137.667	3.33548
1639	2.9863	137.599	3.3361
1640	2.9808	137.77	3.33851
1641	2.9736	138.13	3.3422
1642	2.9639	138.744	3.34652
1643	2.9524	139.599	3.35206
1644	2.9404	140.528	3.3589
1645	2.9269	141.671	3.367
1646	2.9137	142.903	3.37507
1647	2.9005	144.235	3.38432
1648	2.8884	145.571	3.39354
1649	2.8773	146.872	3.40224
1650	2.8677	148.092	3.41027
1651	2.8598	149.21	3.41475
1652	2.8532	150.257	3.42095
1653	2.8488	151.113	3.42425
1654	2.8462	151.773	3.42633
1655	2.8464	152.14	3.42593
1656	2.849	152.244	3.42503
1657	2.854	152.075	3.42475
1658	2.861	151.682	3.42208
1659	2.8693	151.136	3.42004
1660	2.879	150.405	3.41862
1661	2.8905	149.485	3.41781
1662	2.9036	148.357	3.41769
1663	2.9177	147.134	3.41758
1664	2.9319	145.877	3.41987
1665	2.9455	144.688	3.42223
1666	2.9574	143.691	3.42753
1667	2.9675	142.841	3.43283
1668	2.9739	142.334	3.43993
1669	2.9766	142.105	3.4465
1670	2.9755	142.196	3.45653
1671	2.97	142.638	3.46538
1672	2.9606	143.38	3.47362
1673	2.9485	144.325	3.48127
1674	2.9339	145.465	3.48888
1675	2.9183	146.713	3.49468
1676	2.9025	147.991	3.50042
1677	2.8876	149.19	3.5056
1678	2.874	150.276	3.50892
1679	2.8621	151.204	3.51168
1680	2.8528	151.788	3.51262
1681	2.8463	152.032	3.51422
1682	2.8429	151.952	3.51465
1683	2.8431	151.461	3.51448
1684	2.8469	150.601	3.51555
1685	2.8545	149.412	3.516
1686	2.8654	147.954	3.51711
1687	2.8785	146.37	3.51827
1688	2.8938	144.651	3.52
1689	2.9096	143.066	3.52348
1690	2.9253	141.628	3.52584
1691	2.9401	140.435	3.52882
1692	2.9522	139.5	3.53294
1693	2.96	138.997	3.5365
1694	2.9643	138.799	3.53898
1695	2.9643	138.95	3.54193
1696	2.96	139.418	3.54435
1697	2.9518	140.218	3.54559
1698	2.9391	141.3	3.54625
1699	2.9229	142.653	3.54575
1700	2.9051	144.069	3.54452
1701	2.8857	145.566	3.54217
1702	2.8661	147.074	3.54033
1703	2.8465	148.522	3.53733
1704	2.8285	149.701	3.53496
1705	2.8113	150.717	3.53189
1706	2.7963	151.394	3.53178
1707	2.7837	151.707	3.53106
1708	2.774	151.645	3.53091
1709	2.7671	151.234	3.53255
1710	2.7623	150.509	3.53423
1711	2.7596	149.592	3.53937
1712	2.7587	148.517	3.54389
1713	2.7594	147.323	3.55081
1714	2.7604	146.199	3.55772
1715	2.7617	145.193	3.56469
1716	2.7623	144.419	3.57168
1717	2.762	143.858	3.5781
1718	2.7605	143.51	3.58456
1719	2.7582	143.309	3.5893
1720	2.7542	143.317	3.59396
1721	2.7476	143.548	3.59576
1722	2.7389	143.993	3.59692
1723	2.7286	144.532	3.59737
1724	2.7162	145.241	3.5961
1725	2.7023	146.045	3.59364
1726	2.6871	146.921	3.59228
1727	2.672	147.643	3.58798
1728	2.657	148.36	3.58413
1729	2.6422	149.094	3.57997
1730	2.6275	149.925	3.57764
1731	2.613	150.829	3.57685
1732	2.5983	151.953	3.57572
1733	2.5838	153.211	3.57653
1734	2.5703	154.573	3.57745
1735	2.5585	155.882	3.57917
1736	2.5475	157.215	3.58184
1737	2.5372	158.539	3.5856
1738	2.5278	159.641	3.58988
1739	2.5191	160.538	3.59272
1740	2.511	161.192	3.59488
1741	2.5028	161.488	3.5986
1742	2.4951	161.392	3.60069
1743	2.4876	160.888	3.60076
1744	2.48	160.049	3.60041
1745	2.4721	158.963	3.59964
1746	2.4642	157.706	3.5965
1747	2.4567	156.218	3.59326
1748	2.4498	154.49	3.58895
1749	2.4435	152.678	3.58632
1750	2.4374	150.956	3.58335
1751	2.4316	149.362	3.58083
1752	2.4255	148.127	3.57844
1753	2.4185	147.219	3.57802
1754	2.411	146.625	3.57893
1755	2.4028	146.427	3.58153
1756	2.3936	146.643	3.5865
1757	2.3831	147.341	3.59035
1758	2.371	148.444	3.59615
1759	2.3583	149.999	3.60407
1760	2.3454	151.86	3.61358
1761	2.334	153.756	3.62358
1762	2.3234	155.665	3.63264
1763	2.3142	157.482	3.6414
1764	2.3051	159.21	3.64969
1765	2.2961	160.745	3.65625
1766	2.2872	161.953	3.66164
1767	2.2784	162.635	3.66529
1768	2.2694	162.868	3.6673
1769	2.2602	162.512	3.66763
1770	2.2513	161.615	3.6663
1771	2.2426	160.298	3.66371
1772	2.2343	158.674	3.66075
1773	2.2275	156.773	3.65872
1774	2.2226	154.658	3.65548
1775	2.2198	152.517	3.65394
1776	2.2178	150.52	3.65329
1777	2.2158	148.841	3.6534
1778	2.2141	147.414	3.65517
1779	2.2119	146.37	3.65661
1780	2.2077	145.86	3.65963
1781	2.2019	145.781	3.66389
1782	2.1946	146.105	3.66775
1783	2.1855	146.83	3.67446
1784	2.1749	147.877	3.68117
1785	2.1641	149.065	3.68829
1786	2.153	150.421	3.69509
1787	2.142	151.788	3.70145
1788	2.1312	152.98	3.70668
1789	2.1202	153.951	3.71266
1790	2.1087	154.689	3.71698
1791	2.096	155.264	3.71974
1792	2.0829	155.602	3.71999
1793	2.0697	155.606	3.71948
1794	2.0566	155.412	3.71809
1795	2.0443	155.019	3.71304
1796	2.0334	154.408	3.70734
1797	2.023	153.811	3.70233
1798	2.0132	153.285	3.69835
1799	2.0054	152.75	3.69624
1800	1.9983	152.474	3.6958
1801	1.9915	152.416	3.69599
1802	1.9852	152.573	3.69927
1803	1.9792	153.118	3.70381
1804	1.9733	153.968	3.70959
1805	1.968	154.996	3.71822
1806	1.9635	156.18	3.72701
1807	1.9598	157.388	3.73561
1808	1.957	158.62	3.74442
1809	1.9546	159.832	3.75207
1810	1.9526	160.803	3.75614
1811	1.9498	161.647	3.75978
1812	1.9456	162.413	3.7618
1813	1.9399	162.9	3.76011
1814	1.9325	163.225	3.75678
1815	1.9238	163.281	3.75223
1816	1.9133	163.184	3.74566
1817	1.9013	162.983	3.73669
1818	1.8887	162.64	3.72533
1819	1.8754	162.466	3.71687
1820	1.8615	162.427	3.70724
1821	1.8481	162.55	3.69949
1822	1.8351	162.879	3.69458
1823	1.8237	163.248	3.69106
1824	1.8136	163.904	3.68802
1825	1.8056	164.583	3.68782
1826	1.7995	165.389	3.68967
1827	1.7955	166.141	3.68756
1828	1.7937	166.88	3.68586
1829	1.7943	167.487	3.68457
1830	1.7973	167.907	3.6829
1831	1.8021	168.159	3.68046
1832	1.8073	168.446	3.67805
1833	1.8132	168.642	3.67649
1834	1.8195	168.794	3.67209
1835	1.8257	168.953	3.66729
1836	1.8309	168.981	3.66125
1837	1.8356	168.824	3.65353
1838	1.8397	168.581	3.64418
1839	1.8425	168.332	3.63561
1840	1.8444	168.068	3.62377
1841	1.8452	167.859	3.61356
1842	1.8454	167.69	3.60213
1843	1.845	167.584	3.59114
1844	1.8439	167.601	3.58137
1845	1.8423	167.662	3.57165
1846	1.8405	167.841	3.56238
1847	1.839	168.081	3.55478
1848	1.8378	168.383	3.54807
1849	1.8368	168.818	3.54103
1850	1.836	169.32	3.53569
1851	1.8359	169.749	3.53079
1852	1.8374	169.929	3.52565
1853	1.8396	169.891	3.52139
1854	1.8429	169.655	3.51675
1855	1.8471	169.241	3.51257
1856	1.8522	168.651	3.50632
1857	1.8578	167.909	3.49954
1858	1.8635	167.15	3.49106
1859	1.869	166.506	3.48122
1860	1.8746	165.819	3.46924
1861	1.8802	165.082	3.45704
1862	1.8861	164.333	3.44274
1863	1.8925	163.495	3.42755
1864	1.8988	162.613	3.41387
1865	1.9053	161.722	3.40034
1866	1.9115	160.868	3.38676
1867	1.917	160.17	3.37562
1868	1.9224	159.543	3.3642
1869	1.9272	159.038	3.35495
1870	1.9313	158.831	3.34656
1871	1.9342	158.795	3.3402
1872	1.9367	158.855	3.3344
1873	1.9395	158.963	3.33114
1874	1.9418	159.299	3.32712
1875	1.944	159.695	3.32522
1876	1.9462	160.174	3.32368
1877	1.9483	160.684	3.32182
1878	1.95	161.23	3.32031
1879	1.9519	161.726	3.31586
1880	1.9529	162.29	3.31293
1881	1.9536	162.986	3.3078
1882	1.9543	163.704	3.3009
1883	1.9547	164.511	3.29349
1884	1.9551	165.441	3.28347
1885	1.9552	166.612	3.27263
1886	1.9552	167.911	3.26087
1887	1.9558	169.24	3.24955
1888	1.9566	170.595	3.23806
1889	1.9572	171.998	3.22836
1890	1.9578	173.374	3.21865
1891	1.9585	174.562	3.21017
1892	1.9587	175.634	3.2017
1893	1.9584	176.662	3.19531
1894	1.958	177.402	3.1894
1895	1.9573	177.94	3.1839
1896	1.9558	178.406	3.18042
1897	1.9535	178.797	3.17709
1898	1.9507	179.066	3.17494
1899	1.9471	178.891	3.17314
1900	1.9435	178.418	3.16982
1901	1.9396	177.626	3.16761
1902	1.9359	176.846	3.16457
1903	1.9321	176.1	3.16021
1904	1.928	175.401	3.15538
1905	1.9246	174.832	3.14881
1906	1.9215	174.377	3.14142
1907	1.9188	174.233	3.13447
1908	1.917	174.283	3.12664
1909	1.9165	174.445	3.11889
1910	1.9169	174.59	3.11194
1911	1.9187	174.289	3.10388
1912	1.9224	173.308	3.09781
1913	1.9276	171.626	3.09317
1914	1.9347	169.481	3.08933
1915	1.9435	167.134	3.08478
1916	1.9544	164.605	3.08352
1917	1.9662	162.096	3.08121
1918	1.9783	159.762	3.08136
1919	1.9888	157.815	3.08157
1920	1.9957	156.515	3.08349
1921	1.9991	155.718	3.08543
1922	1.999	155.48	3.08777
1923	1.9948	155.786	3.08974
1924	1.9878	156.479	3.09175
1925	1.9792	157.27	3.09235
1926	1.9701	157.948	3.09213
1927	1.9615	158.344	3.09023
1928	1.9535	158.495	3.08984
1929	1.947	158.257	3.0879
1930	1.9412	157.781	3.08588
1931	1.9362	157.021	3.0838
1932	1.9311	156.356	3.08188
1933	1.925	155.92	3.08073
1934	1.9175	155.807	3.08167
1935	1.9081	156.112	3.08225
1936	1.8976	156.814	3.0837
1937	1.8866	157.808	3.08724
1938	1.8751	158.98	3.09125
1939	1.8651	160.005	3.09562
1940	1.8565	160.73	3.10171
1941	1.8497	161.051	3.10817
1942	1.8444	161.029	3.11468
1943	1.8399	160.817	3.12194
1944	1.8355	160.563	3.12792
1945	1.8301	160.525	3.13594
1946	1.8229	161.044	3.14068
1947	1.814	162.127	3.14617
1948	1.803	164.016	3.1496
1949	1.7914	166.538	3.15178
1950	1.7798	169.598	3.15388
1951	1.7697	172.889	3.15524
1952	1.7627	175.31	3.15577
1953	1.7601	174.781	3.15675
1954	1.7614	171.863	3.156
1955	1.7655	168.681	3.15663
1956	1.7704	166.146	3.1577
1957	1.7747	164.398	3.15879
1958	1.7769	163.645	3.16064
1959	1.7769	163.849	3.16266
1960	1.7748	164.883	3.16531
1961	1.7722	166.412	3.16804
1962	1.7704	167.951	3.17044
1963	1.7711	168.62	3.17272
1964	1.7752	167.808	3.17627
1965	1.7823	165.852	3.17875
1966	1.7914	163.405	3.18272
1967	1.801	161.026	3.18511
1968	1.8093	159.085	3.18709
1969	1.8145	157.882	3.18749
1970	1.8161	157.397	3.18706
1971	1.8148	157.621	3.18495
1972	1.81	158.521	3.18286
1973	1.8035	159.97	3.17962
1974	1.7972	161.736	3.17397
1975	1.7922	163.485	3.16706
1976	1.7896	164.88	3.1609
1977	1.7893	165.795	3.1533
1978	1.7921	165.953	3.1444
1979	1.7972	165.488	3.13733
1980	1.8041	164.639	3.1293
1981	1.8126	163.671	3.12102
1982	1.8212	162.941	3.11351
1983	1.8303	162.156	3.10651
1984	1.8404	161.369	3.09923
1985	1.8509	160.457	3.09352
1986	1.8629	159.273	3.08626
1987	1.8762	157.714	3.08201
1988	1.8912	155.827	3.07566
1989	1.9075	153.752	3.06919
1990	1.9233	151.741	3.06418
1991	1.9386	149.874	3.05724
1992	1.9519	148.374	3.04989
1993	1.9621	147.328	3.04205
1994	1.969	146.794	3.03263
1995	1.9723	146.749	3.02385
1996	1.9713	147.274	3.01449
1997	1.9673	148.328	3.00335
1998	1.9607	149.732	2.99475
[truncated: 8,002 more rows]

## Sheet: spin density covariance
	TEMPO_C2C6	TEMPO_N	TEMPO_O	Indole_H(N)	Indole_N	Indole_C2	Indole_C3	Indole_C3a	Indole_C4	Indole_C5	Indole_C6	Indole_C7	Indole_C7a
TEMPO_C2C6	1
TEMPO_N	-0.62298	1
TEMPO_O	0.45304	-0.84905	1
Indole_H(N)	-0.11293	0.08315	-0.06199	1
Indole_N	-0.19744	0.34922	-0.45332	-0.5321	1
Indole_C2	-0.1682	0.08433	-0.00283	-0.20169	0.1815	1
Indole_C3	0.03892	-0.04197	0.08452	-0.4508	0.16321	-0.36492	1
Indole_C3a	0.128	-0.00621	-0.12234	0.45335	-0.21756	-0.19849	-0.57296	1
Indole_C4	0.11193	-0.03961	0.07733	-0.27054	-0.00013	-0.31769	0.57414	-0.32366	1
Indole_C5	0.05729	-0.04508	-0.06348	0.02787	0.19389	0.16173	-0.30515	0.47313	-0.6799	1
Indole_C6	0.0255	-0.02846	0.09992	-0.20164	-0.08325	-0.2154	0.59179	-0.37976	0.78074	-0.61175	1
Indole_C7	-0.08687	-0.04898	0.04273	-0.01251	0.29852	0.27265	-0.19221	-0.05484	-0.66251	0.61789	-0.59007	1
Indole_C7a	0.03406	-0.04371	0.05178	-0.36769	0.06837	0.18742	0.0544	-0.13837	0.12828	-0.02115	-0.02817	-0.10427	1

## Sheet: Supplementary Table2
Supplementary Table2. Summary of ODNP NMR spectra of indole, imidazole and CCl4 acquired on HC probehead
compound	solvent	radical	site	chemical shift* (ppm, - mw)	chemical shift* (ppm, + mw)	1JCH	1JCC	DNP
						(Hz)	(Hz)	Enhancement
indole	CCl4	TEMPO	C2	124.6	123.3	181	67	14.1 ± 2.5 (13C2)
								26.2± 2.4 (U-13C)
			C3	102.2	101.4	170	62	11.6 ± 1.1
			C3a	127	127.0†	-	-	-1.8 ± 0.5
			C4/5/6	119.7	119.5	n.r.‡	n.r.‡	5.4 ± 0.2
			C7	111	109.9	157	62	20.7 ± 2.5
			C7a	134.5	135	-	-	-2.1 ± 0.5
			HN¶	7.23	7.04	-	-	-9.5 ± 0.0
			H2¶	6.61	6.31	n.r.‡	-	-1.5 ± 0.1
			H3¶	6.41	6.17	n.r.‡	-	-8.7 ± 0.0
			H4¶	7.57	7.3	n.r.‡	-	-8.9 ± 0.1
			H5/6¶	7.07	6.83	n.r.‡	-	-10.9 ± 0.0
			H7¶	6.87	6.6	n.r.‡	-	-11.8 ± 0.0
CCl4	CCl4	TEMPONE	C	97.9	91.7	-	-	92.4 ± 19.4
imidazole§	CDCl3	TEMPO	H2	7.86	7.57	n.r.‡	-	-5.2 ± 0.4
			H4/5	7.3	7.02	n.r.‡	-	-4.0 ± 0.2
imidazole§	D2O	TEMPOL	C2	-	136.2	n.r.‡	-	> 0 (low S/N)
			H2	7.7	7.36	n.r.‡	-	-12.3 ± 4.0
			H4/5	7.33	7.02	n.r.‡	-	-18.7 ± 1.7
			HDO	4.7	3.34	-	-	-39.2 ± 2.4
* all chemical shifts are referenced indirectly to TMS
† this peak is assigned tentatively
‡ not resolved (n.r.)
¶ values extracted from spectral deconvolution
§ no stable enhancement values can be obtained due to the severe sample heating

## Sheet: Supplementary Table3
Supplementary Table3. Summary of ODNP NMR spectra of water-soluble compounds acquired on FP probehead
compound	solvent	radical	site	chemical shift* (ppm, - mw)	chemical shift* (ppm, + mw)	1JCH	1JCC	DNP
						(Hz)	(Hz)	Enhancement
imidazole	D2O	TEMPOL	C2	136.2	136	n.r.‡	n.r.‡	50 ± 10
			H2/4/5	7.12 (broad)	7.64	n.r.‡	n.r.‡	-5.0 ± 0.3
			HDO	4.7	5.18	-	-	-9.5 ± 0.2
glucose	H2O	TEMPOL	C1 (β)	96.1	95.9	154	n.r.‡	5.9 ± 1.9
			C1 (α)	92.2	92	156	n.r.‡	6.9 ± 2.2
			C3 (β)	76	75.9	n.r.‡	59
			C2 (β)	74.2	74.2	n.r.‡	59	2.2 ± 0.4 (C2/3/4/5)
			C3 (α)	73	73.1	n.r.‡	50
			C2 (α)/C4 (α+β)	71.5	71.5	n.r.‡	65
			C5(α+β)	69.8	69.9	n.r.‡	74
			C6 (α+β)	61.1	61.1	136	n.r.‡	6.8 ± 1.8
			Hglucose + H2O	4.7	4.65	n.r.‡	-	-8.3 ± 0.2
glycine	H2O	TEMPOL	Cα	41.8	41.9	141	n.r.‡	10.7 ± 1.7
			C’	172.5	n.r.‡	-	n.r.‡	ca. -1†
			Hα	3.16¶	3.22¶	n.r.‡	n.r.‡	10.0 ± 0.1¶
			H2O	4.7	5.02	n.r.‡	-	-9.8 ± 0.1
alanine	H2O	TEMPOL	Cα	50.8	50.8	134	n.r.‡	6.0 ± 1.6
			Cβ	16.7	16.4	131	n.r.‡	6.1 ± 2.2
			C’	175.9	n.r.‡	-	n.r.‡	ca. -1†
			Hβ	1.19	n.r.‡	n.r.‡	n.r.‡	n.r.‡
			Hα + H2O	4.7	4.48	n.r.‡	n.r.‡	-10.2 ± 0.1
serine	H2O	TEMPOL	Cα	56.5	56.2	155	n.r.‡	6.0 ± 0.1
			Cβ	60.3	60	145	n.r.‡	6.5 ± 0.1
			C’	172.5	n.r.‡	-	n.r.‡	ca. -1†
			Hserine + H2O	4.7	4.03	n.r.‡	n.r.‡	-7.0 ± 0.1
proline	H2O	TEMPOL	Cα	61.3	61.5	144	n.r.‡	4.5 ± 0.5
			Cδ	46.3	46.3	145	n.r.‡	10.5 ± 0.8
			Cβ	29.1	29	128	n.r.‡	6.9 ± 0.7
			Cγ	23.8	23.8	133	n.r.‡	8.2 ± 0.7
			C’	174.5	n.r.‡	-	n.r.‡	ca. -1†
			Hβ2/γ	1.78	1.98	n.r.‡	n.r.‡	-2.9 ± 0.2
			Hα/β1/δ + H2O	4.7	3.39	n.r.‡	n.r.‡	-7.0 ± 0.1
* all chemical shifts are referenced indirectly to TMS
† this value is estimated by the disappearance of C’ signal on ODNP NMR spectrum
‡ not resolved (n.r.)
¶ values extracted from spectral deconvolution

## Sheet: Supplementary Table4
Supplementary Table4. Summary of paramagnetic shifts and ODNP enhancements*
compound	solvent	radical	site	Molar-free paramagnetic chemical shift (ppm)	DNP
					Enhancement
indole	CCl4	TEMPO	C2	16.21 ± 0.09	14.1 ± 2.5 (13C2)
					26.2± 2.4 (U-13C)
			C3	14.65 ± 0.07	11.6 ± 1.1
			C3a	11.66 ± 0.07	-1.8 ± 0.5
			C4/5/6	8.17 ± 0.38	5.4 ± 0.2
			C7	14.42 ± 0.09	20.7 ± 2.5
			C7a	10.19 ± 0.07	-2.1 ± 0.5
CCl4	CCl4	TEMPONE	C	25.69 ± 0.07	92.4 ± 19.4
					(430 ± 50)†
CBr4	CCl4	TEMPONE	C	120.4 ± 0.7	128.9 ± 12.9‡
					(600 ± 60)†
CHCl3	CHCl3	TEMPONE	C	46.13 ± 0.63	68.8 ± 12.9‡
					(320 ± 60)†
diethyl malonate	diethyl malonate	TEMPONE	C2	13.38 ± 0.11	6.4 ± 2.1‡ (30 ± 10)†
ethyl acetoacetate	ethyl acetoacetate	TEMPONE	C2	11.36 ± 0.09	3.9 ± 0.2‡ (18 ± 1)†
			C4	10.85 ± 0.08	2.8 ± 0.4‡ (13 ± 2)†
pyruvic acid	pyruvic acid	TEMPONE	C3	6.28 ± 0.15	2.8 ± 0.4‡ (13 ± 2)†
imidazole	D2O	TEMPOL	C2	4.93 ± 0.02	50 ± 10
glucose	H2O	TEMPOL	C1 (β)	1.86 ± 0.02	5.9 ± 1.9
			C1 (α)	2.05 ± 0.02	6.9 ± 2.2
			C3 (β)	1.78 ± 0.02
			C2 (β)	1.43 ± 0.02	2.2 ± 0.4 (C2/3/4/5)
			C3 (α)	1.27 ± 0.01
			C2 (α)/C4 (α+β)	1.87 ± 0.02
			C5(α+β)	1.47 ± 0.02
			C6 (α+β)	3.06 ± 0.02	6.8 ± 1.8
glycine	H2O	TEMPOL	Cα	2.98 ± 0.03	10.7 ± 1.7
			C’	0.68 ± 0.01	ca. -1
alanine	H2O	TEMPOL	Cα	1.93 ± 0.02	6.0 ± 1.6
			Cβ	3.27 ± 0.02	6.1 ± 2.2
			C’	0.68 ± 0.01	ca. -1
serine	H2O	TEMPOL	Cα	1.83 ± 0.01	6.0 ± 0.1
			Cβ	2.43 ± 0.01	6.5 ± 0.1
			C’	0.68 ± 0.01	ca. -1
proline	H2O	TEMPOL	Cα	2.11 ± 0.04	4.5 ± 0.5
			Cδ	3.52 ± 0.04	10.5 ± 0.8
			Cβ	3.06 ± 0.04	6.9 ± 0.7
			Cγ	3.59 ± 0.05	8.2 ± 0.7
			C’	0.27 ± 0.01	ca. -1
* DNP enhancements in organic solvents (white background) or water (gray background) were measured on HC probehead.or FP probehead respectively. All
enhancement values are determined at 9.4 T.
† the DNP enhancement in parenthesis was reported in Ref. [1].
‡ the DNP enhancement value was scaled from the results reported in Ref. [1] via the DNP enhancements determined on CCl4.

## Sheet: Supplementary Table5
Supplementary Table5. Summary of spin density and hyperfine coupling of TEMPOL-amino acid complexes by DFT calculations
substrate	binding site	H-bond length (Å)	H-bond angle (o)	ΔΔG†	spin density |ρ|*104 (atomic unit)
				(kJ/mol)	N	C’	Cα	Cβ	Cγ	Cδ
glycine	NH2	2.092	158	0	68.6	23.2	27.7	-	-	-
	Cα	2.4	118.5	7.65	1.26	7.44	52.8	-	-	-
alanine	NH2	2.076	164.8	0	71.8	1.33	6.88	12.6	-	-
	Cα	2.326	131.3	7.67	0.33	2.95	13.3	21.9	-	-
	Cβ (CH3)	2.447	165.5	8.74	1.36	0.18	1.19	20.3	-	-
serine	NH2	2.098	155.9	0	96.4	0.09	2	2.3	-	-
	Cα	2.294	125	0.18	1.71	5.5	9.09	1.4	-	-
	Cβ	2.452	163	3.37	4.24	0.64	3.88	36.9	-	-
	OH	1.815	161.6	-15.7	0.22	0.24	5.9	11.1	-	-
proline	NH	2.125	162.5	0	15.7	4.22	2.62	0.74	0.59	1.43
	Cα	2.307	137.6	3.82	0.27	0.05	37.6	13.22	1.26	1.2
	Cβ	2.453 (Hβ1)	137.8	3.42	0.76	29.5	6.42	70.03	1.34	7.14
		2.381 (Hβ2)	161.7	0.76	1.13	0.52	5.39	45.2	44.7	2.33
	Cγ	3.018 (Hγ1)*	93.9	3.84	0.5	7.48	4.02	60.9	3.15	9.8
		2.640 (Hγ2)	153.9	4.96	3.01	0.31	6.41	1.3	51.9	14.4
	Cδ	2.661 (Hδ1)	161.6	8.31	0.26	1.35	0.27	1.18	0.41	1.15
		2.384 (Hδ2)	157.6	2.84	0.37	0.16	0.26	1.26	0.33	22.9
† referenced to the energy of TEMPO-substrate(NH) complex
* the optimization consistently yields a structure similar to the Hβ1 complex as indicated by the much higher spin density on Cβ than Cγ

## Sheet: Supplementary Table6
Supplementary Table6. Summary of the mechanistic analysis of indole ODNP behaviors based on paramagnetic NMR and QM/MM MD
site	Molar-free paramagnetic chemical shift (ppm)	Average spin density	average A/h	G(0)*104	jZQ*102† (fs)	Rs,ZQ(s-1)‡	13C T1	13C T1	leakage factor	Rs,ZQ (s-1) QM/MM MD	13C T1	leakage factor	coupling factor	RDQ - RZQ (s-1)	ODNP enhancement
		|ρ|*104 (atomic unit)	(MHz)			QM/MM MD	(- radical)	(+ radical)			(+ radical)			(back-fitted)
C2	16.21 ± 0.09	3.26	0.367	4.55	2.4	0.77	2.63 ± 0.07	0.85 ± 0.08	0.68 ± 0.05	0.77	0.85 ± 0.08	0.68	-0.013 (13C2)	-0.015 (13C2)	14.1 ± 2.5 (13C2)
													-0.024 (U-13C)	-0.029 (U-13C)	26.2± 2.4 (U-13C)
C3	14.65 ± 0.07	0.664	7.46*10-2	12	1.9	1.1	3.01 ± 0.09	1.19 ± 0.03	0.60 ± 0.00	1.1	1.19 ± 0.03	0.6	-0.012	-0.01	11.6 ± 1.1
C3a	11.66 ± 0.07	1.35	0.152	5.45	5.2	1.4	15.3 ± 1.0	1.05 ± 0.03	0.93 ± 0.04	1.4	1.05 ± 0.03	0.93	0.002	0.002	-1.8 ± 0.5
C4/5/6	8.17 ± 0.38	5.83 (C4)	0.655 (C4)	2.05 (C4)	2.1	0.26 (C4)	2.62 ± 0.08 (C4)	1.46 ± 0.03 (C4)	0.44 ± 0.00 (C4)	0.26 (C4)	1.46 ± 0.03 (C4)	0.44 (C4)	-0.0065(C4)	-0.005 (C4)	5.4 ± 0.2
		32.3 (C4)	3.63 (C5)	1.48 (C4)		0.098 (C5)	2.67 ± 0.05 (C5)	1.28 ± 0.02 (C5)	0.52 ± 0.00 (C5)	0.098 (C5)	1.28 ± 0.02 (C5)	0.52 (C5)	-0.0056 (C5)	-0.004 (C5)
		8.19 (C4)	0.921 (C6)	12.6 (C4)		1.4 (C6)	2.34 ± 0.10 (C6)	1.68 ± 0.04 (C6)	0.28 ± 0.01 (C6)	1.4 (C6)	1.68 ± 0.04 (C6)	0.28 (C6)	-0.010 (C6)	-0.006 (C6)
C7	14.42 ± 0.09	1.83	0.205	785	2.2	85	2.62 ± 0.08	1.37 ± 0.04	0.48 ± 0.00	85	1.37 ± 0.04	0.48	-0.027	-0.02	20.7 ± 2.5
C7a	10.19 ± 0.07	0.579	6.51*10-2	98.3	2.4	12	14.8 ± 1.0	1.07 ± 0.02	0.93 ± 0.05	12	1.07 ± 0.02	0.93	0.0022	0.002	-2.1 ± 0.5
† jZQ presents the “spectral density” at ωZQ on the spectral density function Fourier transformed from the normalized spin density autocorrelation function.
ωZQ= ωe – ω13C = (263-0.1)*2π GHz = 1.652 THz
‡ Rs,ZQ is the scalar coupling-driven relaxation

## Sheet: Supplementary figures
	source data
Supplementary Figure 1	source data collected in sheet "T_gyrotron_opt"					https://doi.org/10.6084/m9.figshare.14774433, https://doi.org/10.6084/m9.figshare.14774415
Supplementary Figure 2	source data collected in sheet "paramagnetic shifts"
Supplementary Figure 3	source data collected in sheet "Supplementary Table 4"
Supplementary Figure 4	-
Supplementary Figure 5	source data collected in sheet "spin density trajectory","geometry trajectory"
Supplementary Figure 6	source data collected in sheet "ACF"
Supplementary Figure 7	source data collected in sheet "spectral density"
Supplementary Figure 8	source data collected in sheet "ACF_Laplace"
Supplementary Figure 9	source data collected in sheet "memory function"
Supplementary Figure 10	source data collected in sheet "memory FT"
Supplementary Figure 11	source data collected in sheet "spin density trajectory", "dipolar_fluctuation","AR(p) regression","hNOE"

[truncated: 10 more sheets: T_gyrotron_opt, paramagnetic shifts, ACF, ACF_Laplace, spectral density, memory_function, memory_FT, dipolar_fluctuation, AR(p) regression, hNOE]
